# Supplementary material for: Genome-wide identification of new reference genes for RT-qPCR normalization in CGMMV-infected Lagenaria siceraria
Source: PeerJ. 2018 Oct 12;6:e5642. doi: 10.7717/peerj.5642 (PMC6188008; doi:10.7717/peerj.5642)
Supplement: Table S1 [file peerj-06-5642-s006.xls]

## Sheet: Sheet1
gene_ID	transcript_id(s)	length	effective_length	Name	Annotation	GO_Term	KOG_des	KEGG_KO	KEGG_Pathway	L1_LCG_count	L2_LCG_count	L3_LCG_count	L1_LCK_count	L2_LCK_count	L3_LCK_count	L1_LCG_rpkm	L2_LCG_rpkm	L3_LCG_rpkm	L1_LCK_rpkm	L2_LCK_rpkm	L3_LCK_rpkm	mean_count_LCG	mean_count_LCK	mean_rpkm_LCG	mean_rpkm_LCK	log2fold_change	ABS(log2fold_change)	pvalue	FDR	significant
comp88003_c0	comp88003_c0_seq1	318	318	-	-	-	-	-	-	14	21.83	23.71	4	7	15.02	1.51	2.06	1.82	0.44	1.18	1.11	19.8467	8.67333	1.79667	0.91	0.981384	0.981384	0.0426062	0.800877	no
comp26185_c0	comp26185_c0_seq1	2050	2050	Q8YV57	-	GO:0004197(cysteine-type endopeptidase activity);GO:0006508(proteolysis)	[R] General function prediction only	-	-	949.15	1063.44	1268.1	834.8	510.45	1221	12.63	12.38	11.99	11.31	10.6	11.19	1093.56	855.417	12.3333	11.0333	0.160694	0.160694	0.0113431	0.800877	no
comp6713_c0	comp6713_c0_seq1	4257	4257	P92979	adenylyl-sulfate reductase (glutathione)	GO:0009570(chloroplast stroma);GO:0051539(4 iron, 4 sulfur cluster binding);GO:0033741(adenylyl-sulfate reductase (glutathione) activity);GO:0009973(adenylyl-sulfate reductase activity);GO:0046872(metal ion binding);GO:0045454(cell redox homeostasis);GO:0	-	K05907	-	2479.8	1806.72	2397.41	3133.25	2036.38	4250.65	15.59	9.94	10.71	20.05	19.98	18.4	2227.98	3140.09	12.08	19.4767	-0.689126	0.689126	0.0429293	0.800877	no
comp12813_c0	comp12813_c0_seq1,comp12813_c0_seq2,comp12813_c0_seq3,comp12813_c0_seq4	1825	1218.77	-	-	-	[R] General function prediction only	-	-	2554.17	2381	2726.47	1019.85	1039.48	2151.47	57.02	46.12	45.57	25.56	38.93	35.4	2553.88	1403.6	49.57	33.2967	0.57409	0.57409	0.0411594	0.800877	no
comp259190_c0	comp259190_c0_seq1	285	285	-	-	-	-	-	-	9	10.01	10	5	2	8	1.12	1.09	0.89	0.63	0.39	0.69	9.67	5	1.03333	0.57	0.858272	0.858272	0.0183255	0.800877	no
comp59462_c0	comp59462_c0_seq1	406	406	-	-	-	-	-	-	30	24	41	11	9.67	20	2.38	1.66	2.31	0.89	1.2	1.09	31.6667	13.5567	2.11667	1.06	0.99773	0.99773	0.0307009	0.800877	no
comp16334_c0	comp16334_c0_seq1,comp16334_c0_seq10,comp16334_c0_seq11,comp16334_c0_seq2,comp16334_c0_seq3,comp16334_c0_seq4,comp16334_c0_seq5,comp16334_c0_seq6,comp16334_c0_seq7,comp16334_c0_seq8,comp16334_c0_seq9	2630	1763.12	Q551H4	non-specific serine/threonine protein kinase	GO:0005524(ATP binding);GO:0046872(metal ion binding);GO:0004674(protein serine/threonine kinase activity)	[T] Signal transduction mechanisms	K08282	-	257.12	276.86	302	133	88	271.33	3.73	3.31	3.1	1.56	1.76	2.49	278.66	164.11	3.38	1.93667	0.803448	0.803448	0.0176915	0.800877	no
comp337266_c0	comp337266_c0_seq1	649	649	-	-	-	-	-	-	7	16	17	26	12	26	0.32	0.64	0.55	1.21	0.86	0.82	13.3333	21.3333	0.503333	0.963333	-0.936521	0.936521	0.0457126	0.800877	no
comp330095_c0	comp330095_c0_seq1	379	379	-	-	-	-	-	-	7	7	9	4	3	7	0.6	0.53	0.55	0.35	0.4	0.42	7.66667	4.66667	0.56	0.39	0.521953	0.521953	0.00446545	0.800877	no
comp15210_c0	comp15210_c0_seq1,comp15210_c0_seq2,comp15210_c0_seq3,comp15210_c0_seq4,comp15210_c0_seq5,comp15210_c0_seq6,comp15210_c0_seq7	1890	1512.3	Q9C8T1	heme exporter protein A	GO:0016020(membrane);GO:0030288(outer membrane-bounded periplasmic space);GO:0005524(ATP binding);GO:0015439(heme-transporting ATPase activity);GO:0017004(cytochrome complex assembly)	[I] Lipid transport and metabolism ;[R] General function prediction only	K02193	ko02010(ABC transporters)	308	358.06	400.06	233	148.92	367.93	5.72	5.71	5.57	4.14	4.29	5.04	355.373	249.95	5.66667	4.49	0.335785	0.335785	0.0479644	0.800877	no
comp15968_c0	comp15968_c0_seq1,comp15968_c0_seq10,comp15968_c0_seq11,comp15968_c0_seq12,comp15968_c0_seq13,comp15968_c0_seq14,comp15968_c0_seq15,comp15968_c0_seq16,comp15968_c0_seq2,comp15968_c0_seq3,comp15968_c0_seq4,comp15968_c0_seq5,comp15968_c0_seq6,comp15968_c0_s	2937	1694.82	P04146	-	-	[R] General function prediction only	-	-	1036.87	1071.04	1429.9	969.19	519.07	1418.22	17.54	15.97	16.12	14.43	12.7	14.73	1179.27	968.827	16.5433	13.9533	0.24564	0.24564	0.0350363	0.800877	no
comp16341_c0	comp16341_c0_seq1,comp16341_c0_seq2,comp16341_c0_seq3,comp16341_c0_seq4,comp16341_c0_seq5	1424	745.57	P93280	-	GO:0016021(integral to membrane);GO:0031966(mitochondrial membrane);GO:0015232(heme transporter activity);GO:0017004(cytochrome complex assembly)	-	-	-	143	180.25	149	63	49.97	91	3.76	3.88	3.55	1.81	2.07	2.27	157.417	67.99	3.73	2.05	0.863552	0.863552	0.000819819	0.800877	no
comp30184_c0	comp30184_c0_seq1	964	964	-	-	-	-	-	-	151.72	145	244	71.84	62	161.42	4.48	3.75	5.12	2.16	2.86	3.28	180.24	98.42	4.45	2.76667	0.685657	0.685657	0.0321203	0.800877	no
comp1570_c0	comp1570_c0_seq1,comp1570_c0_seq2	251	244.03	-	-	-	-	-	-	5	6	8	2	2	5.78	0.77	0.78	0.84	0.32	0.46	0.6	6.33333	3.26	0.796667	0.46	0.792342	0.792342	0.0449723	0.800877	no
comp16439_c0	comp16439_c0_seq1	676	676	Q03274	-	GO:0004519(endonuclease activity);GO:0003723(RNA binding);GO:0003964(RNA-directed DNA polymerase activity);GO:0006278(RNA-dependent DNA replication)	[R] General function prediction only	-	-	22	29	31.93	35	25	59	0.96	1.11	0.99	1.56	1.7	1.78	27.6433	39.6667	1.02	1.68	-0.719892	0.719892	0.00172013	0.800877	no
comp418544_c0	comp418544_c0_seq1	336	336	-	-	-	-	-	-	6	7	9	3	2	6	0.6	0.61	0.64	0.31	0.31	0.41	7.33333	3.66667	0.616667	0.343333	0.844881	0.844881	0.00824254	0.800877	no
comp11717_c0	comp11717_c0_seq1,comp11717_c0_seq2,comp11717_c0_seq3	1479	1301.75	P46665	homeobox-leucine zipper protein	GO:0005634(nucleus);GO:0043565(sequence-specific DNA binding);GO:0003700(sequence-specific DNA binding transcription factor activity)	[K] Transcription	K09338	-	2987.8	2981.8	3944.24	1727.35	1182.33	1877.45	64.23	56.14	59.57	37.57	39.76	27.63	3304.61	1595.71	59.98	34.9867	0.777676	0.777676	0.00790217	0.800877	no
comp6630_c0	comp6630_c0_seq1	970	970	-	-	-	-	-	-	40.96	38.17	46	20	10	35	1.2	0.98	0.96	0.6	0.46	0.71	41.71	21.6667	1.04667	0.59	0.827015	0.827015	0.0124907	0.800877	no
comp96271_c0	comp96271_c0_seq1	1529	1529	-	-	-	-	-	-	83	117	125	71	40	101	1.5	1.85	1.61	1.31	1.13	1.26	108.333	70.6667	1.65333	1.23333	0.422815	0.422815	0.0364712	0.800877	no
comp9209_c0	comp9209_c0_seq1,comp9209_c0_seq2,comp9209_c0_seq3,comp9209_c0_seq4	3243	3214.18	Q00766	starch phosphorylase	GO:0005622(intracellular);GO:0008184(glycogen phosphorylase activity);GO:0000166(nucleotide binding);GO:0030170(pyridoxal phosphate binding);GO:0005980(glycogen catabolic process)	[G] Carbohydrate transport and metabolism	K00688	ko00500(Starch and sucrose metabolism);ko04910(Insulin signaling pathway)	1453.15	1440.16	2951.21	2598.67	1590.97	4546.59	12.16	10.55	17.54	22.14	20.77	26.18	1948.17	2912.08	13.4167	23.03	-0.779488	0.779488	0.0252201	0.800877	no
comp132480_c0	comp132480_c0_seq1	1385	1385	-	-	-	-	-	-	44	47	47	26	17	43.99	0.88	0.82	0.67	0.53	0.53	0.61	46	28.9967	0.79	0.556667	0.505039	0.505039	0.0483834	0.800877	no
comp3893_c0	comp3893_c0_seq1,comp3893_c0_seq2	1265	1241.79	P37959	1-acylglycerone phosphate reductase	GO:0005488(binding);GO:0016491(oxidoreductase activity)	[Q] Secondary metabolites biosynthesis, transport and catabolism	K06123	ko00564(Glycerophospholipid metabolism);ko00565(Ether lipid metabolism)	1932.07	1621.73	2104.02	529.17	737.29	1482.47	43.49	31.92	33.64	12.11	25.93	22.95	1885.94	916.31	36.35	20.33	0.838345	0.838345	0.0455725	0.800877	no
comp18507_c0	comp18507_c0_seq1	1952	1952	Q8LDB8	-	GO:0016021(integral to membrane);GO:0016874(ligase activity);GO:0008270(zinc ion binding)	[O] Posttranslational modification, protein turnover, chaperones	-	-	2945.62	3028.06	3282.98	1552.81	1323.8	3005.63	41.24	37.09	32.67	22.13	28.93	28.99	3085.55	1960.75	37	26.6833	0.471586	0.471586	0.0376995	0.800877	no
comp9311_c0	comp9311_c0_seq1	1247	1247	-	-	-	-	-	-	72	64	88	38	20	51	1.61	1.26	1.4	0.87	0.7	0.79	74.6667	36.3333	1.42333	0.786667	0.855449	0.855449	0.0122666	0.800877	no
comp5883_c0	comp5883_c0_seq1	1708	1708	-	-	-	-	-	-	78.92	98.42	115	93	60.96	140.98	1.27	1.39	1.32	1.52	1.53	1.56	97.4467	98.3133	1.32667	1.53667	-0.211998	0.211998	0.0177509	0.800877	no
comp18409_c0	comp18409_c0_seq1	7625	7625	Q99PV0	-	GO:0016607(nuclear speck);GO:0003723(RNA binding);GO:0000398(nuclear mRNA splicing, via spliceosome)	[A] RNA processing and modification	-	-	9983.47	12927.4	13848.6	11345.1	8053.44	18331.6	34.76	39.38	34.27	40.21	43.77	43.97	12253.2	12576.7	36.1367	42.65	-0.239082	0.239082	0.0365838	0.800877	no
comp8232_c0	comp8232_c0_seq1,comp8232_c0_seq2	2276	2262.55	Q9SXS2	sulfate permease, SulP family	GO:0016021(integral to membrane);GO:0008271(secondary active sulfate transmembrane transporter activity);GO:0015293(symporter activity)	[P] Inorganic ion transport and metabolism	K03321	-	2107.2	2112.78	2217.54	743.01	937.93	1247.74	25.34	22.13	18.9	9.1	17.51	10.28	2145.84	976.227	22.1233	12.2967	0.847301	0.847301	0.0435854	0.800877	no
comp2799_c0	comp2799_c0_seq1	963	963	-	-	-	-	-	-	10	10	17	18	10	24	0.3	0.26	0.36	0.54	0.46	0.49	12.3333	17.3333	0.306667	0.496667	-0.695607	0.695607	0.00789207	0.800877	no
comp19834_c0	comp19834_c0_seq1	2314	2314	Q9SG96	-	GO:0016021(integral to membrane);GO:0008270(zinc ion binding)	[O] Posttranslational modification, protein turnover, chaperones	-	-	857.34	834	1054.89	417.57	296.94	854.93	10.06	8.57	8.8	4.99	5.44	6.91	915.41	523.147	9.14333	5.78	0.661651	0.661651	0.0117825	0.800877	no
comp3786_c0	comp3786_c0_seq1	1077	1077	-	-	-	-	-	-	32	26	41	10	11	24	0.84	0.6	0.76	0.27	0.45	0.43	33	15	0.733333	0.383333	0.93587	0.93587	0.0196857	0.800877	no
comp7786_c0	comp7786_c0_seq1	347	347	P48980	beta-galactosidase	GO:0004565(beta-galactosidase activity);GO:0043169(cation binding);GO:0005529(sugar binding);GO:0005975(carbohydrate metabolic process)	[G] Carbohydrate transport and metabolism	K01190	ko00052(Galactose metabolism);ko00511(Other glycan degradation);ko00600(Sphingolipid metabolism)	118	111	138.82	77	42	116.99	11.36	9.35	9.5	7.55	6.31	7.76	122.607	78.6633	10.07	7.20667	0.48266	0.48266	0.0268013	0.800877	no
comp6125_c1	comp6125_c1_seq1	2351	2351	Q9FIB2	-	GO:0005488(binding)	[R] General function prediction only	-	-	145.04	188.72	211.97	106.93	83	150	1.67	1.91	1.74	1.26	1.5	1.19	181.91	113.31	1.77333	1.31667	0.429574	0.429574	0.0204227	0.800877	no
comp228382_c0	comp228382_c0_seq1	835	835	-	-	-	-	-	-	26	31	30	15	11	29	0.9	0.94	0.74	0.53	0.59	0.69	29	18.3333	0.86	0.603333	0.511381	0.511381	0.0319551	0.800877	no
comp23703_c0	comp23703_c0_seq1	441	441	-	-	-	-	-	-	247	381.18	500.17	101.3	113.96	287.85	17.69	23.89	25.47	7.39	12.74	14.21	376.117	167.703	22.35	11.4467	0.965347	0.965347	0.0265791	0.800877	no
comp80879_c0	comp80879_c0_seq1	569	569	-	-	-	-	-	-	52	60	94	16	27	47	2.76	2.79	3.55	0.87	2.24	1.72	68.6667	30	3.03333	1.61	0.913843	0.913843	0.0490181	0.800877	no
comp11997_c0	comp11997_c0_seq1,comp11997_c0_seq2,comp11997_c0_seq3	1474	1031.43	-	-	-	[P] Inorganic ion transport and metabolism	-	-	380.88	311	400.61	187	139.99	237	10.79	8.05	7.95	5.56	6.48	4.7	364.163	187.997	8.93	5.58	0.678395	0.678395	0.0486063	0.800877	no
comp343763_c0	comp343763_c0_seq1	359	359	-	-	-	-	-	-	5	3	7	8	6	11	0.46	0.24	0.46	0.75	0.86	0.7	5	8.33333	0.386667	0.77	-0.993768	0.993768	0.0165929	0.800877	no
comp9907_c0	comp9907_c0_seq1,comp9907_c0_seq2,comp9907_c0_seq3,comp9907_c0_seq4	5444	5295.93	Q9C9I6	-	GO:0005488(binding)	[R] General function prediction only	-	-	1519.72	1581.04	1888.67	1150.05	774.28	1713.59	7.69	6.85	6.77	5.8	6	5.89	1663.14	1212.64	7.10333	5.89667	0.268597	0.268597	0.0499142	0.800877	no
comp29537_c0	comp29537_c0_seq1	5119	5119	Q9LYZ7	E3 ubiquitin-protein ligase TRIP12	GO:0005622(intracellular);GO:0016881(acid-amino acid ligase activity);GO:0005488(binding);GO:0006464(protein modification process)	[O] Posttranslational modification, protein turnover, chaperones	K10590	ko04120(Ubiquitin mediated proteolysis)	1470.38	1597.55	1873.14	1048.91	719.22	1855.67	7.66	7.28	6.94	5.56	5.85	6.66	1647.02	1207.93	7.29333	6.02333	0.276016	0.276016	0.0396885	0.800877	no
comp257472_c0	comp257472_c0_seq1	364	364	-	-	-	-	-	-	9	8	12	6	2	5	0.82	0.63	0.77	0.55	0.28	0.31	9.66667	4.33333	0.74	0.38	0.961526	0.961526	0.0309731	0.800877	no
comp192183_c0	comp192183_c0_seq1	262	262	-	-	-	-	-	-	8	7.73	9.07	6.07	3	7	1.12	0.95	0.9	0.86	0.65	0.67	8.26667	5.35667	0.99	0.726667	0.446135	0.446135	0.0493343	0.800877	no
comp24100_c0	comp24100_c0_seq1	3360	3360	Q9SH30	Cu2+-exporting ATPase	GO:0016021(integral to membrane);GO:0005524(ATP binding);GO:0005507(copper ion binding);GO:0004008(copper-exporting ATPase activity);GO:0006754(ATP biosynthetic process);GO:0010273(detoxification of copper ion)	[P] Inorganic ion transport and metabolism	K01533	-	1701.02	1827.16	2192.59	746.7	677.1	1709.24	13.61	12.79	12.47	6.08	8.46	9.42	1906.92	1044.35	12.9567	7.98667	0.698029	0.698029	0.0274635	0.800877	no
comp16378_c0	comp16378_c0_seq1,comp16378_c0_seq2	1297	1047.49	-	-	-	-	-	-	198.25	201.02	246	142.96	91.99	166.01	5.78	4.92	5.14	4.15	3.94	3.26	215.09	133.653	5.28	3.78333	0.48088	0.48088	0.0159287	0.800877	no
comp15019_c0	comp15019_c0_seq1,comp15019_c0_seq2,comp15019_c0_seq3,comp15019_c0_seq4	2766	1941.32	Q8S403	-	GO:0016021(integral to membrane);GO:0005886(plasma membrane);GO:0016036(cellular response to phosphate starvation);GO:0006817(phosphate transport)	[U] Intracellular trafficking, secretion, and vesicular transport	-	-	264	243	345.46	87.55	43	198	3.49	2.78	2.91	1.73	1.48	1.72	284.153	109.517	3.06	1.64333	0.896907	0.896907	0.0140525	0.800877	no
comp76258_c0	comp76258_c0_seq1	453	453	-	-	-	-	-	-	57.27	52	74.96	36	20	37.98	3.97	3.16	3.7	2.54	2.17	1.82	61.41	31.3267	3.61	2.17667	0.729878	0.729878	0.0109909	0.800877	no
comp148029_c0	comp148029_c0_seq1	819	819	-	-	-	-	-	-	46	47	53	23	13	28	1.62	1.45	1.33	0.83	0.72	0.68	48.6667	21.3333	1.46667	0.743333	0.98046	0.98046	0.00447482	0.800877	no
comp8739_c0	comp8739_c0_seq1	1910	1910	-	-	-	[K] Transcription	-	-	2328.04	2681.37	3276.2	1786.09	1028.98	2077.58	33.34	33.6	33.35	26.04	23	20.49	2761.87	1630.88	33.43	23.1767	0.52847	0.52847	0.0233628	0.800877	no
comp16347_c0	comp16347_c0_seq1,comp16347_c0_seq2,comp16347_c0_seq3,comp16347_c0_seq4,comp16347_c0_seq5	1329	1112.42	Q9M0U9	-	GO:0005634(nucleus)	[R] General function prediction only	-	-	441.59	426.98	631.42	327.16	222.06	414.94	11.22	9.58	11.65	8.36	8.66	7.6	499.997	321.387	10.8167	8.20667	0.398388	0.398388	0.0353985	0.800877	no
comp22081_c0	comp22081_c0_seq1	2243	2243	Q058P4	-	GO:0000151(ubiquitin ligase complex);GO:0005488(binding);GO:0004842(ubiquitin-protein ligase activity)	-	-	-	747.98	926.24	1187.91	648	435	1046.09	9.07	9.82	10.23	8	8.23	8.74	954.043	709.697	9.70667	8.32333	0.221815	0.221815	0.034151	0.800877	no
comp26025_c0	comp26025_c0_seq1	1056	1056	O82251	-	GO:0009941(chloroplast envelope);GO:0005739(mitochondrion)	-	-	-	396.77	329.77	466.01	520.66	311	672.76	10.62	7.73	8.87	14.19	13	12.41	397.517	501.473	9.07333	13.2	-0.540833	0.540833	0.0202186	0.800877	no
comp217917_c0	comp217917_c0_seq1	649	649	-	-	-	-	-	-	16.91	20	21	12	8	17	0.77	0.8	0.68	0.56	0.57	0.54	19.3033	12.3333	0.75	0.556667	0.430077	0.430077	0.0273911	0.800877	no
comp54173_c0	comp54173_c0_seq1	474	474	-	-	-	-	-	-	53.11	58	86.01	29	24.07	40.97	3.49	3.34	4.02	1.94	2.47	1.86	65.7067	31.3467	3.61667	2.09	0.791158	0.791158	0.00568639	0.800877	no
comp157413_c0	comp157413_c0_seq1	622	622	-	-	-	-	-	-	22	26	36.08	13	12	16	1.06	1.09	1.23	0.63	0.9	0.53	28.0267	13.6667	1.12667	0.686667	0.714379	0.714379	0.0398807	0.800877	no
comp9641_c0	comp9641_c0_seq1,comp9641_c0_seq2,comp9641_c0_seq3	4115	3341.64	O19922	cell division protease FtsH	GO:0009535(chloroplast thylakoid membrane);GO:0016021(integral to membrane);GO:0005524(ATP binding);GO:0046872(metal ion binding);GO:0004222(metalloendopeptidase activity);GO:0017111(nucleoside-triphosphatase activity);GO:0030163(protein catabolic process	[O] Posttranslational modification, protein turnover, chaperones	K03798	-	2560.14	2601.77	3526.12	2753.82	1768.14	4119.23	20.97	18.72	20.73	23.25	23.11	23.55	2896.01	2880.4	20.14	23.3033	-0.210473	0.210473	0.0433689	0.800877	no
comp15704_c0	comp15704_c0_seq1	906	906	-	-	-	-	-	-	23	30	33	14	7	19	0.73	0.83	0.74	0.45	0.35	0.41	28.6667	13.3333	0.766667	0.403333	0.926627	0.926627	0.00112078	0.800877	no
comp7803_c0	comp7803_c0_seq1,comp7803_c0_seq2	2216	2172.08	-	-	-	-	-	-	736.4	665.89	1015.93	402.87	344.98	711.76	9.22	7.3	8.97	5.08	6.78	6.12	806.073	486.537	8.49667	5.99333	0.503538	0.503538	0.0343509	0.800877	no
comp53673_c0	comp53673_c0_seq1	1380	1380	-	-	-	-	-	-	25	21	34	13	8	25	0.5	0.37	0.49	0.27	0.25	0.35	26.6667	15.3333	0.453333	0.29	0.644519	0.644519	0.03874	0.800877	no
comp142628_c0	comp142628_c0_seq1	816	816	-	-	-	-	-	-	32	31	47	16	9	30	1.13	0.96	1.18	0.58	0.5	0.73	36.6667	18.3333	1.09	0.603333	0.853301	0.853301	0.00681171	0.800877	no
comp59891_c0	comp59891_c0_seq1	1202	1202	-	-	-	-	-	-	97.73	85.89	130	45.99	40	86.41	2.28	1.75	2.15	1.09	1.46	1.39	104.54	57.4667	2.06	1.31333	0.649411	0.649411	0.0227373	0.800877	no
comp5331_c0	comp5331_c0_seq1	473	473	Q9C5U3	26S proteasome regulatory subunit T6	GO:0005829(cytosol);GO:0005634(nucleus);GO:0005886(plasma membrane);GO:0000502(proteasome complex);GO:0005524(ATP binding);GO:0017111(nucleoside-triphosphatase activity);GO:0030163(protein catabolic process)	[O] Posttranslational modification, protein turnover, chaperones	K03066	ko03050(Proteasome)	381.7	433.99	450	258	197	360.95	25.15	25.02	21.08	17.31	20.26	16.38	421.897	271.983	23.75	17.9833	0.401267	0.401267	0.0322205	0.800877	no
comp18695_c0	comp18695_c0_seq1	5958	5958	Q7GB25	ATP-binding cassette, subfamily C (CFTR/MRP), member 3	GO:0016021(integral to membrane);GO:0000325(plant-type vacuole);GO:0005774(vacuolar membrane);GO:0005524(ATP binding);GO:0008281(sulfonylurea receptor activity);GO:0008559(xenobiotic-transporting ATPase activity);GO:0030007(cellular potassium ion homeosta	[Q] Secondary metabolites biosynthesis, transport and catabolism	K05667	ko02010(ABC transporters)	2034.99	2188.19	3228.38	3350.08	1729.78	4860.01	9.09	8.56	10.25	15.24	12.06	14.96	2483.85	3313.29	9.3	14.0867	-0.599028	0.599028	0.0257044	0.800877	no
comp52121_c0	comp52121_c0_seq1	935	935	-	-	-	-	-	-	63	89.02	95.98	41	14	74	1.92	2.38	2.08	1.27	0.67	1.56	82.6667	43	2.12667	1.16667	0.866202	0.866202	0.0474628	0.800877	no
comp16672_c0	comp16672_c0_seq1	440	440	-	-	-	-	-	-	7	9	12	10	7	17	0.5	0.57	0.61	0.73	0.78	0.84	9.33333	11.3333	0.56	0.783333	-0.4842	0.4842	0.00782305	0.800877	no
comp51371_c0	comp51371_c0_seq1	410	410	-	-	-	-	-	-	27.03	28.81	42.03	15	12	20	2.11	1.97	2.34	1.19	1.47	1.08	32.6233	15.6667	2.14	1.24667	0.779535	0.779535	0.00495223	0.800877	no
comp16027_c0	comp16027_c0_seq1,comp16027_c0_seq10,comp16027_c0_seq11,comp16027_c0_seq12,comp16027_c0_seq13,comp16027_c0_seq14,comp16027_c0_seq15,comp16027_c0_seq16,comp16027_c0_seq17,comp16027_c0_seq18,comp16027_c0_seq19,comp16027_c0_seq2,comp16027_c0_seq20,comp16027_	6125	3919.11	Q8W5R1	DNA mismatch repair protein MSH3	GO:0005634(nucleus);GO:0003677(DNA binding);GO:0004519(endonuclease activity);GO:0046872(metal ion binding);GO:0006281(DNA repair)	[L] Replication, recombination and repair	K08736	ko03430(Mismatch repair);ko05200(Pathways in cancer);ko05210(Colorectal cancer)	1874.84	1958.39	2506.17	1474.66	974.24	2350.13	13.05	11.93	11.37	8.79	10.84	10.05	2113.13	1599.68	12.1167	9.89333	0.292464	0.292464	0.0473821	0.800877	no
comp584300_c0	comp584300_c0_seq1	437	437	-	-	-	-	-	-	8	8	14	4	3	7	0.58	0.51	0.72	0.29	0.34	0.35	10	4.66667	0.603333	0.326667	0.885136	0.885136	0.0371808	0.800877	no
comp149797_c0	comp149797_c0_seq1	403	403	-	-	-	-	-	-	18	18	19	9	8	13	1.44	1.26	1.08	0.73	1	0.72	18.3333	10	1.26	0.816667	0.625604	0.625604	0.0336696	0.800877	no
comp3948_c0	comp3948_c0_seq1	3120	3120	P42158	-	GO:0005737(cytoplasm);GO:0009506(plasmodesma);GO:0005524(ATP binding);GO:0004674(protein serine/threonine kinase activity)	[T] Signal transduction mechanisms	K00924	-	2814.17	2846.11	3176.4	1604.86	1404.54	2628.68	24.29	21.49	19.49	14.1	18.92	15.63	2945.56	1879.36	21.7567	16.2167	0.42398	0.42398	0.0496403	0.800877	no
comp7730_c0	comp7730_c0_seq1,comp7730_c0_seq2	1570	1549.34	Q8GZ38	phytochrome-interacting factor 3	GO:0005634(nucleus);GO:0009506(plasmodesma);GO:0003677(DNA binding);GO:0009567(double fertilization forming a zygote and endosperm);GO:0006355(regulation of transcription, DNA-dependent);GO:0006351(transcription, DNA-dependent)	-	K12126	ko04712(Circadian rhythm - plant)	2936.83	2454.6	2927.78	1052.35	1137.2	1942.1	52.16	38.05	36.83	19.1	31.31	23.64	2773.07	1377.22	42.3467	24.6833	0.778711	0.778711	0.0489885	0.800877	no
comp703165_c0	comp703165_c0_seq1	310	310	-	-	-	-	-	-	2	1	2	3	2	3	0.22	0.1	0.16	0.34	0.35	0.23	1.66667	2.66667	0.16	0.306667	-0.938599	0.938599	0.0477291	0.800877	no
comp13741_c0	comp13741_c0_seq1	333	333	-	-	-	-	-	-	44	36	42.37	61.01	40	74.97	4.47	3.2	3.06	6.3	6.34	5.24	40.79	58.66	3.57667	5.96	-0.736697	0.736697	0.0157454	0.800877	no
comp42739_c0	comp42739_c0_seq1	241	241	-	-	-	-	-	-	27.02	23.35	40.97	33.97	28.01	50.59	4.25	3.22	4.58	5.44	6.88	5.49	30.4467	37.5233	4.01667	5.93667	-0.563654	0.563654	0.0381722	0.800877	no
comp6394_c0	comp6394_c0_seq1	1548	1548	-	-	-	-	-	-	76	92.03	116	49.01	43.04	83.96	1.36	1.44	1.47	0.89	1.2	1.03	94.6767	58.67	1.42333	1.04	0.45269	0.45269	0.0379286	0.800877	no
comp10398_c0	comp10398_c0_seq1,comp10398_c0_seq2	663	621.39	-	-	-	-	-	-	42	68.1	60	28	24	36	2.11	2.76	2.15	1.34	1.67	1.3	56.7	29.3333	2.34	1.43667	0.703783	0.703783	0.0306848	0.800877	no
comp64837_c0	comp64837_c0_seq1	1098	1098	-	-	-	-	-	-	28	37.24	44	14	12	23	0.72	0.84	0.8	0.37	0.48	0.41	36.4133	16.3333	0.786667	0.42	0.905363	0.905363	0.00159803	0.800877	no
comp12092_c0	comp12092_c0_seq1	785	785	-	-	-	-	-	-	30	40	37.09	20.99	15	24	1.11	1.29	0.97	0.79	0.87	0.61	35.6967	19.9967	1.12333	0.756667	0.570056	0.570056	0.0398728	0.800877	no
comp9001_c0	comp9001_c0_seq1,comp9001_c0_seq2	2693	2680.27	-	-	-	[G] Carbohydrate transport and metabolism	-	-	4542.04	4663.2	5112.68	3116.65	1820.87	4795.16	45.84	41.24	36.82	32.15	28.78	33.43	4772.64	3244.23	41.3	31.4533	0.392929	0.392929	0.0433957	0.800877	no
comp340844_c0	comp340844_c0_seq1	744	744	-	-	-	-	-	-	23	23	33	16	10	15	0.9	0.79	0.92	0.64	0.61	0.41	26.3333	13.6667	0.87	0.553333	0.652867	0.652867	0.0289465	0.800877	no
comp18322_c0	comp18322_c0_seq1	3868	3868	Q9SZR1	Ca2+-transporting ATPase	GO:0016021(integral to membrane);GO:0005886(plasma membrane);GO:0009506(plasmodesma);GO:0005524(ATP binding);GO:0005388(calcium-transporting ATPase activity);GO:0005516(calmodulin binding);GO:0046872(metal ion binding);GO:0006754(ATP biosynthetic process)	[P] Inorganic ion transport and metabolism	K01537	-	5542.26	6869.53	6911.86	3781.96	2769.86	6092.22	38.41	41.65	34.05	26.68	29.96	29.08	6441.22	4214.68	38.0367	28.5733	0.412721	0.412721	0.0341041	0.800877	no
comp294731_c0	comp294731_c0_seq1	554	554	-	-	-	-	-	-	8	12	15	6	5	9	0.44	0.58	0.58	0.33	0.43	0.34	11.6667	6.66667	0.533333	0.366667	0.540568	0.540568	0.0490054	0.800877	no
comp17368_c0	comp17368_c0_seq1	1476	1476	P25776	-	GO:0004197(cysteine-type endopeptidase activity);GO:0006508(proteolysis)	[O] Posttranslational modification, protein turnover, chaperones	K01376	-	8587.58	7920.61	9982.37	3603.01	2616.16	7180.43	161.04	129.96	133.06	68.78	76.58	92.76	8830.19	4466.53	141.353	79.3733	0.83258	0.83258	0.00907334	0.800877	no
comp8160_c1	comp8160_c1_seq1	304	304	-	-	-	-	-	-	40.76	42	63	29.16	22	35	4.66	4.2	5.12	3.39	3.93	2.76	48.5867	28.72	4.66	3.36	0.471869	0.471869	0.0418712	0.800877	no
comp2090_c0	comp2090_c0_seq1	417	417	-	-	-	-	-	-	11	9	15	6	3	10	0.84	0.6	0.82	0.47	0.36	0.53	11.6667	6.33333	0.753333	0.453333	0.732716	0.732716	0.0384315	0.800877	no
comp14692_c0	comp14692_c0_seq1,comp14692_c0_seq2	2456	2225.24	-	-	-	-	-	-	170.75	150	167.15	68	59	123.02	1.99	1.61	1.56	0.9	1.14	1.17	162.633	83.34	1.72	1.07	0.684798	0.684798	0.0216784	0.800877	no
comp53200_c0	comp53200_c0_seq1	478	478	-	-	-	-	-	-	38	35	39	14	10	37	2.47	1.99	1.8	0.93	1.02	1.66	37.3333	20.3333	2.08667	1.20333	0.794164	0.794164	0.0450251	0.800877	no
comp8133_c0	comp8133_c0_seq1	3577	3577	Q9M907	-	GO:0005488(binding)	[R] General function prediction only	-	-	456	511.99	542.32	288	237.29	455.05	3.42	3.36	2.89	2.2	2.78	2.35	503.437	326.78	3.22333	2.44333	0.399703	0.399703	0.0320148	0.800877	no
comp12591_c0	comp12591_c0_seq1	861	861	-	-	-	-	-	-	22	19	31	13	6	20	0.73	0.56	0.74	0.44	0.31	0.46	24	13	0.676667	0.403333	0.746473	0.746473	0.0236057	0.800877	no
comp131603_c0	comp131603_c0_seq1	257	257	-	-	-	-	-	-	7	10	12.01	3	3	9	1.01	1.26	1.23	0.44	0.67	0.89	9.67	5	1.16667	0.666667	0.807355	0.807355	0.0401561	0.800877	no
comp329165_c0	comp329165_c0_seq1	385	385	-	-	-	-	-	-	10	16	14	18	11	22	0.85	1.18	0.84	1.55	1.45	1.28	13.3333	17	0.956667	1.42667	-0.57656	0.57656	0.031163	0.800877	no
comp12465_c0	comp12465_c0_seq1	426	426	-	-	-	-	-	-	18	16	26	12	5	17	1.34	1.05	1.38	0.91	0.58	0.87	20	11.3333	1.25667	0.786667	0.675778	0.675778	0.0330171	0.800877	no
comp2465_c0	comp2465_c0_seq1	430	430	-	-	-	-	-	-	10	13	16	5	5	8	0.74	0.84	0.84	0.38	0.58	0.41	13	6	0.806667	0.456667	0.820831	0.820831	0.0150617	0.800877	no
comp246_c0	comp246_c0_seq1	521	521	-	-	-	-	-	-	13	16.86	19	6	6	12	0.76	0.87	0.79	0.36	0.55	0.49	16.2867	8	0.806667	0.466667	0.78958	0.78958	0.011292	0.800877	no
comp16757_c4	comp16757_c4_seq1,comp16757_c4_seq10,comp16757_c4_seq11,comp16757_c4_seq12,comp16757_c4_seq13,comp16757_c4_seq14,comp16757_c4_seq15,comp16757_c4_seq16,comp16757_c4_seq17,comp16757_c4_seq18,comp16757_c4_seq19,comp16757_c4_seq2,comp16757_c4_seq20,comp16757_	3799	2151.4	C0LGG9	-	GO:0016021(integral to membrane);GO:0005886(plasma membrane);GO:0005524(ATP binding);GO:0004674(protein serine/threonine kinase activity);GO:0004872(receptor activity)	-	K00924	-	10622.5	13454.4	12037.5	4917.25	4456.5	9140.48	120.55	128.06	98.8	61.22	85.21	75.24	12038.1	6171.41	115.803	73.89	0.648226	0.648226	0.0219706	0.800877	no
comp76299_c0	comp76299_c0_seq1	730	730	-	-	-	-	-	-	70.52	87	88	48	26	80.82	2.83	3.05	2.51	1.96	1.63	2.23	81.84	51.6067	2.79667	1.94	0.527652	0.527652	0.0218953	0.800877	no
comp43867_c0	comp43867_c0_seq1	1747	1747	-	-	-	-	-	-	309.84	377.21	420	160.85	132	207	4.87	5.19	4.69	2.57	3.24	2.24	369.017	166.617	4.91667	2.68333	0.873654	0.873654	0.00700352	0.800877	no
comp16158_c1	comp16158_c1_seq1,comp16158_c1_seq2,comp16158_c1_seq3,comp16158_c1_seq4	1082	702.24	-	-	-	-	-	-	609	740.12	485.97	235.97	166.1	326.68	23.33	23.91	16.37	11.28	9.76	10.8	611.697	242.917	21.2033	10.6133	0.998413	0.998413	0.0444713	0.800877	no
comp398103_c0	comp398103_c0_seq1	317	317	-	-	-	-	-	-	1	2	2	2	2	4	0.11	0.19	0.15	0.22	0.34	0.3	1.66667	2.66667	0.15	0.286667	-0.934412	0.934412	0.0391829	0.800877	no
comp178120_c0	comp178120_c0_seq1	456	456	-	-	-	-	-	-	11	16	17	7	4	13	0.76	0.96	0.83	0.49	0.43	0.62	14.6667	8	0.85	0.513333	0.727567	0.727567	0.0143048	0.800877	no
comp811749_c0	comp811749_c0_seq1	431	431	-	-	-	-	-	-	4	3	5	7	3	10	0.29	0.19	0.26	0.52	0.34	0.51	4	6.66667	0.246667	0.456667	-0.888579	0.888579	0.0498845	0.800877	no
comp6980_c0	comp6980_c0_seq1,comp6980_c0_seq2	2263	2229.62	Q9FLQ4	2-oxoglutarate dehydrogenase E2 component (dihydrolipoamide succinyltransferase)	GO:0022626(cytosolic ribosome);GO:0005739(mitochondrion);GO:0045252(oxoglutarate dehydrogenase complex);GO:0004149(dihydrolipoyllysine-residue succinyltransferase activity);GO:0008270(zinc ion binding);GO:0006979(response to oxidative stress);GO:0006099(t	[C] Energy production and conversion	K00658	ko00020(Citrate cycle (TCA cycle));ko00310(Lysine degradation)	1519.98	1939.68	2965.22	2380.44	1585.5	4041.15	18.45	20.6	25.61	29.26	29.87	33.67	2141.63	2669.03	21.5533	30.9333	-0.521251	0.521251	0.0270412	0.800877	no
comp203726_c0	comp203726_c0_seq1	231	231	-	-	-	-	-	-	3.83	3	7	6.99	5	10	0.64	0.44	0.83	1.19	1.31	1.15	4.61	7.33	0.636667	1.21667	-0.934324	0.934324	0.0224181	0.800877	no
comp1210_c0	comp1210_c0_seq1	344	344	-	-	-	-	-	-	3	5	4	5	5	10	0.29	0.43	0.28	0.5	0.76	0.67	4	6.66667	0.333333	0.643333	-0.948601	0.948601	0.0343543	0.800877	no
comp102794_c0	comp102794_c0_seq1	635	635	-	-	-	-	-	-	10	9	18	21	12.01	30	0.47	0.37	0.6	1	0.88	0.97	12.3333	21.0033	0.48	0.95	-0.984893	0.984893	0.00779473	0.800877	no
comp9212_c0	comp9212_c0_seq1,comp9212_c0_seq2	1690	1421.8	Q9M0Y3	-	-	[F] Nucleotide transport and metabolism	-	-	388	429.95	404	124	148	292	7.26	7.27	5.67	2.42	4.43	3.97	407.317	188	6.73333	3.60667	0.900655	0.900655	0.0185818	0.800877	no
comp208448_c0	comp208448_c0_seq1	551	551	-	-	-	-	-	-	12	19	20	8	5	10	0.66	0.92	0.78	0.45	0.43	0.38	17	7.66667	0.786667	0.42	0.905363	0.905363	0.0319528	0.800877	no
comp265152_c0	comp265152_c0_seq1	1192	1192	Q99315	putative transposase	GO:0005737(cytoplasm);GO:0005634(nucleus);GO:0004190(aspartic-type endopeptidase activity);GO:0005524(ATP binding);GO:0003677(DNA binding);GO:0003887(DNA-directed DNA polymerase activity);GO:0004523(ribonuclease H activity);GO:0003723(RNA binding);GO:0003	[R] General function prediction only	K07497	-	37	48	60	33	18	31.01	0.87	0.99	1	0.79	0.66	0.5	48.3333	27.3367	0.953333	0.65	0.552541	0.552541	0.0494542	0.800877	no
comp8821_c0	comp8821_c0_seq1,comp8821_c0_seq2	367	365.93	-	-	-	-	-	-	48.33	60	67.01	27	13	51	4.35	4.73	4.3	2.49	1.82	3.16	58.4467	30.3333	4.46	2.49	0.840898	0.840898	0.0260347	0.800877	no
comp22311_c0	comp22311_c0_seq1	2359	2359	Q9LSN7	-	GO:0005634(nucleus);GO:0003677(DNA binding);GO:0006355(regulation of transcription, DNA-dependent);GO:0006351(transcription, DNA-dependent)	-	-	-	898.34	862.03	1009.85	355.88	413.9	561.33	10.34	8.68	8.26	4.17	7.43	4.45	923.407	443.703	9.09333	5.35	0.76527	0.76527	0.0482504	0.800877	no
comp26624_c0	comp26624_c0_seq1	423	423	-	-	-	-	-	-	254.95	211	277.02	108.76	70.3	232.26	19.21	13.91	14.83	8.34	8.27	12.05	247.657	137.107	15.9833	9.55333	0.742492	0.742492	0.0387216	0.800877	no
comp43349_c0	comp43349_c0_seq1	1106	1106	-	-	-	-	-	-	20	24	46	39.46	22	65.85	0.51	0.53	0.83	1.02	0.87	1.16	30	42.4367	0.623333	1.01667	-0.705771	0.705771	0.0440577	0.800877	no
comp44748_c0	comp44748_c0_seq1	333	333	-	-	-	-	-	-	25	27.99	39	13	11	25	2.54	2.49	2.81	1.34	1.74	1.75	30.6633	16.3333	2.61333	1.61	0.69883	0.69883	0.00511436	0.800877	no
comp17564_c0	comp17564_c0_seq1	1859	1859	Q9XF61	prolyl 4-hydroxylase, beta polypeptide	GO:0005788(endoplasmic reticulum lumen);GO:0009055(electron carrier activity);GO:0003756(protein disulfide isomerase activity);GO:0015035(protein disulfide oxidoreductase activity);GO:0045454(cell redox homeostasis);GO:0006662(glycerol ether metabolic pro	[O] Posttranslational modification, protein turnover, chaperones	K09580	-	3596.73	3917.69	4717.44	3660.61	2632.29	6131.64	52.97	50.49	49.39	54.88	60.52	62.21	4077.29	4141.51	50.95	59.2033	-0.216596	0.216596	0.0467411	0.800877	no
comp10078_c1	comp10078_c1_seq1	594	594	-	-	-	-	-	-	63.99	65	68	29	25	62.42	3.24	2.88	2.44	1.49	1.97	2.17	65.6633	38.8067	2.85333	1.87667	0.604476	0.604476	0.0343489	0.800877	no
comp81920_c0	comp81920_c0_seq1	473	473	-	-	-	-	-	-	32.79	31	50.86	16	13	23	2.16	1.79	2.38	1.07	1.34	1.04	38.2167	17.3333	2.11	1.15	0.875609	0.875609	0.0149964	0.800877	no
comp13237_c0	comp13237_c0_seq1,comp13237_c0_seq2,comp13237_c0_seq3,comp13237_c0_seq4,comp13237_c0_seq5,comp13237_c0_seq6,comp13237_c0_seq7	3057	2172.28	Q9SA76	-	GO:0009507(chloroplast);GO:0005488(binding);GO:0009793(embryo development ending in seed dormancy)	[R] General function prediction only	-	-	1006.92	1027.07	1363.6	1159.87	740.13	1639.06	10.81	10.97	12.65	14.73	14.54	16.2	1132.53	1179.69	11.4767	15.1567	-0.401249	0.401249	0.00983493	0.800877	no
comp16904_c0	comp16904_c0_seq1,comp16904_c0_seq10,comp16904_c0_seq11,comp16904_c0_seq12,comp16904_c0_seq13,comp16904_c0_seq2,comp16904_c0_seq3,comp16904_c0_seq4,comp16904_c0_seq5,comp16904_c0_seq6,comp16904_c0_seq7,comp16904_c0_seq8,comp16904_c0_seq9	3479	1499.22	P33079	-	GO:0009734(auxin mediated signaling pathway)	-	-	-	457.79	449.71	751.92	245	133	374.02	7.69	6.66	8.16	4.35	3.26	4.41	553.14	250.673	7.50333	4.00667	0.905129	0.905129	0.00416042	0.800877	no
comp14955_c0	comp14955_c0_seq1,comp14955_c0_seq2	5423	5335.61	Q759G7	helicase SWR1	GO:0005634(nucleus);GO:0005524(ATP binding);GO:0003677(DNA binding);GO:0004386(helicase activity);GO:0016568(chromatin modification);GO:0006355(regulation of transcription, DNA-dependent);GO:0006351(transcription, DNA-dependent)	[R] General function prediction only	K11681	-	1674.79	1941.19	2494.55	1973.65	1218.11	3143.54	8.28	8.51	8.85	10	9.56	10.78	2036.84	2111.77	8.54667	10.1133	-0.242825	0.242825	0.0316451	0.800877	no
comp459_c0	comp459_c0_seq1	375	375	-	-	-	-	-	-	12	13	17	6	3	13	1.05	0.99	1.06	0.53	0.41	0.78	14	7.33333	1.03333	0.573333	0.84986	0.84986	0.0469958	0.800877	no
comp5213_c0	comp5213_c0_seq1,comp5213_c0_seq2	2296	2050.97	-	-	-	-	-	-	1678.89	1433.94	1608.26	680.15	510.17	1154.84	20.87	16.39	15.22	9.02	11	11.19	1573.7	781.72	17.4933	10.4033	0.749759	0.749759	0.0396026	0.800877	no
comp493530_c0	comp493530_c0_seq1	265	265	-	-	-	-	-	-	5	5	9	3	2	3	0.69	0.6	0.88	0.42	0.43	0.28	6.33333	2.66667	0.723333	0.376667	0.941372	0.941372	0.031991	0.800877	no
comp168270_c0	comp168270_c0_seq1	788	788	-	-	-	-	-	-	32	34	32	19	10	27	1.18	1.1	0.84	0.71	0.57	0.68	32.6667	18.6667	1.04	0.653333	0.670692	0.670692	0.0480077	0.800877	no
comp6870_c0	comp6870_c0_seq1	741	741	-	-	-	-	-	-	66	82	96	55.97	36	73	2.6	2.83	2.69	2.25	2.21	1.98	81.3333	54.99	2.70667	2.14667	0.334419	0.334419	0.00740576	0.800877	no
comp8013_c0	comp8013_c0_seq1,comp8013_c0_seq2	3226	2868.05	-	-	-	-	-	-	7249.44	7361.05	7434.87	2915.99	2707.03	6883.04	68.47	60.72	49.64	27.4	39.72	44.14	7348.45	4168.69	59.61	37.0867	0.684654	0.684654	0.0388307	0.800877	no
comp126072_c0	comp126072_c0_seq1	2368	2368	-	-	-	-	-	-	87	107	144	76	50	91.87	1	1.07	1.17	0.89	0.89	0.73	112.667	72.6233	1.08	0.836667	0.368306	0.368306	0.0288472	0.800877	no
comp14510_c0	comp14510_c0_seq1,comp14510_c0_seq2,comp14510_c0_seq3	1382	971.87	-	-	-	-	-	-	64	48	86	39	26	55.62	2.13	1.55	1.95	1.34	1.28	1.08	66	40.2067	1.87667	1.23333	0.60561	0.60561	0.0465859	0.800877	no
comp4180_c0	comp4180_c0_seq1,comp4180_c0_seq2	1725	1184.86	Q39096	-	-	-	-	-	18267.6	16428.5	14823.3	4317.39	3877.98	10656.6	357.78	294.01	256.83	137.19	152.57	206.87	16506.5	6284	302.873	165.543	0.871506	0.871506	0.02309	0.800877	no
comp16792_c0	comp16792_c0_seq1,comp16792_c0_seq10,comp16792_c0_seq2,comp16792_c0_seq3,comp16792_c0_seq4,comp16792_c0_seq5,comp16792_c0_seq6,comp16792_c0_seq7,comp16792_c0_seq8,comp16792_c0_seq9	3885	2695.87	Q9M8M3	-	GO:0005739(mitochondrion)	[R] General function prediction only	-	-	590.2	572.14	662.92	336	198.97	470.81	5.67	4.56	4.53	2.98	2.84	3.39	608.42	335.26	4.92	3.07	0.68042	0.68042	0.0244794	0.800877	no
comp14578_c0	comp14578_c0_seq1,comp14578_c0_seq2,comp14578_c0_seq3,comp14578_c0_seq4,comp14578_c0_seq5,comp14578_c0_seq6,comp14578_c0_seq7,comp14578_c0_seq8,comp14578_c0_seq9	3364	2896.29	Q8VY13	-	GO:0016021(integral to membrane);GO:0005739(mitochondrion);GO:0005886(plasma membrane);GO:0009055(electron carrier activity);GO:0000293(ferric-chelate reductase activity);GO:0050660(flavin adenine dinucleotide binding);GO:0005506(iron ion binding)	[P] Inorganic ion transport and metabolism ;[Q] Secondary metabolites biosynthesis, transport and catabolism	-	-	2745.58	2631.91	4160.04	2007.9	916.77	2863.25	24.51	21.28	27.1	19.18	12.95	17.88	3179.18	1929.31	24.2967	16.67	0.543504	0.543504	0.0404054	0.800877	no
comp290063_c0	comp290063_c0_seq1	622	622	-	-	-	-	-	-	13	12	14	7	3	10	0.62	0.5	0.48	0.34	0.22	0.33	13	6.66667	0.533333	0.296667	0.846195	0.846195	0.0157866	0.800877	no
comp15975_c0	comp15975_c0_seq1,comp15975_c0_seq10,comp15975_c0_seq11,comp15975_c0_seq12,comp15975_c0_seq13,comp15975_c0_seq14,comp15975_c0_seq15,comp15975_c0_seq16,comp15975_c0_seq17,comp15975_c0_seq18,comp15975_c0_seq2,comp15975_c0_seq3,comp15975_c0_seq4,comp15975_c0	5803	2596.01	Q8RYC8	WNK lysine deficient protein kinase	GO:0005634(nucleus);GO:0003677(DNA binding);GO:0046983(protein dimerization activity);GO:0009734(auxin mediated signaling pathway);GO:0010386(lateral root primordium development);GO:0048366(leaf development);GO:0006355(regulation of transcription, DNA-dep	-	K08867	-	5245.15	6236.63	6780.39	3661.12	2842.14	6642.76	52.4	52.61	47.45	37.19	44.2	43.7	6087.39	4382.01	50.82	41.6967	0.285464	0.285464	0.0355059	0.800877	no
comp5658_c0	comp5658_c0_seq1	556	556	-	-	-	-	-	-	44	40.59	60.99	31	17	40.08	2.4	1.94	2.36	1.72	1.45	1.51	48.5267	29.36	2.23333	1.56	0.517653	0.517653	0.0258845	0.800877	no
comp5429_c0	comp5429_c0_seq1	571	571	P43309	-	GO:0009543(chloroplast thylakoid lumen);GO:0004097(catechol oxidase activity);GO:0046872(metal ion binding)	-	-	-	806.1	1043.39	1043.91	347.18	391.81	836.17	42.64	48.29	39.25	18.7	32.35	30.47	964.467	525.053	43.3933	27.1733	0.675282	0.675282	0.0415171	0.800877	no
comp982_c0	comp982_c0_seq1	357	357	-	-	-	-	-	-	4	6	8	6	5	12	0.37	0.49	0.53	0.57	0.73	0.77	6	7.66667	0.463333	0.69	-0.574546	0.574546	0.0463886	0.800877	no
comp21593_c0	comp21593_c0_seq1	237	237	P69322	ubiquitin C	GO:0005737(cytoplasm);GO:0005634(nucleus)	[O] Posttranslational modification, protein turnover, chaperones ;[R] General function prediction only	K08770	ko03320(PPAR signaling pathway)	238.69	197.88	236.36	107.43	54.45	164.44	38.5	27.93	27.1	17.64	13.71	18.27	224.31	108.773	31.1767	16.54	0.914507	0.914507	0.0432724	0.800877	no
comp58143_c0	comp58143_c0_seq1	274	274	-	-	-	-	-	-	27	26.14	28.98	12	9	18	3.55	3.01	2.71	1.61	1.85	1.63	27.3733	13	3.09	1.69667	0.864904	0.864904	0.021755	0.800877	no
comp10276_c0	comp10276_c0_seq1,comp10276_c0_seq2,comp10276_c0_seq3,comp10276_c0_seq4	1676	1620.44	-	D-cysteine desulfhydrase	-	-	K05396	ko00270(Cysteine and methionine metabolism)	135	120.99	205.94	181	127.08	276.58	2.28	1.79	2.49	3.17	3.34	3.25	153.977	194.887	2.18667	3.25333	-0.573185	0.573185	0.0302155	0.800877	no
comp11262_c0	comp11262_c0_seq1,comp11262_c0_seq2	1380	1318	-	-	-	[R] General function prediction only	-	-	382.14	351.01	488.94	294	155.38	362	8.11	6.49	7.36	6.33	5.11	5.25	407.363	270.46	7.32	5.56333	0.395894	0.395894	0.0462188	0.800877	no
comp17694_c0	comp17694_c0_seq1	2097	2097	Q39817	calnexin	GO:0005789(endoplasmic reticulum membrane);GO:0016021(integral to membrane);GO:0005509(calcium ion binding);GO:0005529(sugar binding);GO:0051082(unfolded protein binding);GO:0006457(protein folding)	[O] Posttranslational modification, protein turnover, chaperones	K08054	ko04145(Phagosome);ko04612(Antigen processing and presentation)	9361.49	10884.1	13079.4	13179.7	9492.86	18933.2	121.66	123.77	120.82	174.36	192.56	169.5	11108.3	13868.6	122.083	178.807	-0.550534	0.550534	0.0138835	0.800877	no
comp58688_c0	comp58688_c0_seq1	1470	1470	-	-	-	-	-	-	134.49	141	226.86	73.53	73.46	109	2.53	2.32	3.04	1.41	2.16	1.41	167.45	85.33	2.63	1.66	0.66388	0.66388	0.0432769	0.800877	no
comp60527_c0	comp60527_c0_seq1	1307	1307	Q9XHM5	gibberellin 2-oxidase	GO:0045543(gibberellin 2-beta-dioxygenase activity);GO:0005506(iron ion binding);GO:0016702(oxidoreductase activity, acting on single donors with incorporation of molecular oxygen, incorporation of two atoms of oxygen)	[Q] Secondary metabolites biosynthesis, transport and catabolism ;[R] General function prediction only	K04125	ko00904(Diterpenoid biosynthesis)	239.54	195.35	273.97	64.04	80.87	195	5.11	3.64	4.15	1.39	2.69	2.86	236.287	113.303	4.3	2.31333	0.894363	0.894363	0.0352372	0.800877	no
comp267605_c0	comp267605_c0_seq1	360	360	-	-	-	-	-	-	7	7	8	5	2	5	0.64	0.56	0.52	0.47	0.29	0.32	7.33333	4	0.573333	0.36	0.671377	0.671377	0.0404332	0.800877	no
comp14719_c0	comp14719_c0_seq1,comp14719_c0_seq2,comp14719_c0_seq3	6161	5193.16	Q921C3	bromodomain and WD repeat domain containing protein 1/3	GO:0005737(cytoplasm);GO:0005634(nucleus);GO:0005515(protein binding);GO:0006357(regulation of transcription from RNA polymerase II promoter);GO:0006351(transcription, DNA-dependent)	[R] General function prediction only	K11798	-	2292.13	2687.11	2959.07	2074.73	1522.71	3257.14	10.55	10.56	9.93	11.23	11.25	11.08	2646.1	2284.86	10.3467	11.1867	-0.112614	0.112614	0.0487464	0.800877	no
comp44967_c0	comp44967_c0_seq1	219	219	-	-	-	-	-	-	33	31	37	14	8	24.99	5.98	4.92	4.77	2.58	2.26	3.12	33.6667	15.6633	5.22333	2.65333	0.977165	0.977165	0.00744201	0.800877	no
comp12047_c2	comp12047_c2_seq1	291	291	-	-	-	-	-	-	6	8	13.11	5	2	5	0.73	0.85	1.13	0.62	0.38	0.42	9.03667	4	0.903333	0.473333	0.932402	0.932402	0.0467872	0.800877	no
comp8187_c0	comp8187_c0_seq1,comp8187_c0_seq2	1908	1721.71	P46573	-	GO:0009507(chloroplast);GO:0005886(plasma membrane);GO:0005524(ATP binding);GO:0004674(protein serine/threonine kinase activity);GO:0004713(protein tyrosine kinase activity)	[T] Signal transduction mechanisms	K00924	-	2264.68	3153.25	3132.59	1494	1287.25	2469.24	35.75	43.69	35.51	24.57	32.36	27.3	2850.17	1750.16	38.3167	28.0767	0.4486	0.4486	0.0453267	0.800877	no
comp116003_c0	comp116003_c0_seq1	273	273	-	-	-	-	-	-	16	18.98	32	10	7	12	2.11	2.19	3.01	1.34	1.44	1.09	22.3267	9.66667	2.43667	1.29	0.917538	0.917538	0.0445996	0.800877	no
comp334142_c0	comp334142_c0_seq1	480	480	-	-	-	-	-	-	10	12	12	7	3	9	0.65	0.68	0.55	0.46	0.3	0.4	11.3333	6.33333	0.626667	0.386667	0.696608	0.696608	0.0180094	0.800877	no
comp16741_c0	comp16741_c0_seq1,comp16741_c0_seq2,comp16741_c0_seq3,comp16741_c0_seq4,comp16741_c0_seq5,comp16741_c0_seq6	1791	1439.16	-	-	-	[Q] Secondary metabolites biosynthesis, transport and catabolism ;[R] General function prediction only	K06892	-	971.19	869.35	814	227.21	352.99	577.32	19.69	16.64	12.89	5.15	11.48	9.07	884.847	385.84	16.4067	8.56667	0.937476	0.937476	0.0439903	0.800877	no
comp10313_c0	comp10313_c0_seq1,comp10313_c0_seq2	1474	1308.23	-	-	-	-	-	-	20	20	34	24	20	44	0.42	0.38	0.52	0.53	0.67	0.65	24.6667	29.3333	0.44	0.616667	-0.486987	0.486987	0.0430917	0.800877	no
comp101327_c0	comp101327_c0_seq1	2307	2307	-	-	-	[R] General function prediction only	-	-	61	52.58	86	101	48	142.76	0.72	0.54	0.72	1.21	0.88	1.16	66.5267	97.2533	0.66	1.08333	-0.714939	0.714939	0.0336902	0.800877	no
comp13095_c0	comp13095_c0_seq1,comp13095_c0_seq10,comp13095_c0_seq2,comp13095_c0_seq3,comp13095_c0_seq4,comp13095_c0_seq5,comp13095_c0_seq6,comp13095_c0_seq7,comp13095_c0_seq8,comp13095_c0_seq9	3270	2725.06	-	-	-	[Z] Cytoskeleton	-	-	2570.7	2516.11	2803.39	1383.57	1187.16	2267.41	25.53	21.89	19.78	13.62	18.34	15.39	2630.07	1612.71	22.4	15.7833	0.505097	0.505097	0.0400726	0.800877	no
comp15159_c1	comp15159_c1_seq1,comp15159_c1_seq2,comp15159_c1_seq3	835	730.52	-	-	-	-	-	-	50	56	70	39	23	48.18	1.87	2.06	1.87	1.53	1.45	1.34	58.6667	36.7267	1.93333	1.44	0.425022	0.425022	0.00444294	0.800877	no
comp109258_c0	comp109258_c0_seq1	446	446	-	-	-	-	-	-	33	29	38	40	31	62	2.33	1.79	1.91	2.88	3.42	3.02	33.3333	44.3333	2.01	3.10667	-0.628172	0.628172	0.00887813	0.800877	no
comp135618_c0	comp135618_c0_seq1	407	407	-	-	-	-	-	-	34	35.88	47	16	12	21	2.68	2.48	2.64	1.29	1.48	1.14	38.96	16.3333	2.6	1.30333	0.996306	0.996306	0.000914436	0.800877	no
comp70247_c0	comp70247_c0_seq1	1005	1005	-	-	-	-	-	-	39	54	58	32	18	32	1.1	1.33	1.16	0.92	0.79	0.62	50.3333	27.3333	1.19667	0.776667	0.623654	0.623654	0.0211515	0.800877	no
comp11694_c0	comp11694_c0_seq1	378	378	-	-	-	-	-	-	8	10	15	4	3	9	0.69	0.76	0.92	0.35	0.4	0.54	11	5.33333	0.79	0.43	0.877516	0.877516	0.0163534	0.800877	no
comp3217_c0	comp3217_c0_seq1	600	600	-	-	-	-	-	-	71	57.43	78.88	21	25	52	3.55	2.51	2.8	1.07	1.95	1.79	69.1033	32.6667	2.95333	1.60333	0.88127	0.88127	0.0312755	0.800877	no
comp8659_c0	comp8659_c0_seq1	602	602	-	-	-	-	-	-	49	52	84	27.21	20	32.96	2.44	2.27	2.97	1.38	1.55	1.13	61.6667	26.7233	2.56	1.35333	0.919627	0.919627	0.0134805	0.800877	no
comp72914_c0	comp72914_c0_seq1	2498	2498	-	-	-	-	-	-	131	113	177.28	65	51	115	1.42	1.07	1.37	0.72	0.86	0.86	140.427	77	1.28667	0.813333	0.66172	0.66172	0.0341993	0.800877	no
comp14204_c0	comp14204_c0_seq1	400	400	-	-	-	-	-	-	5	6	10	2	2	6	0.4	0.42	0.57	0.16	0.25	0.33	7	3.33333	0.463333	0.246667	0.909488	0.909488	0.0411693	0.800877	no
comp10315_c0	comp10315_c0_seq1	546	546	O22187	interleukin-1 receptor-associated kinase 4	GO:0016021(integral to membrane);GO:0005524(ATP binding);GO:0004674(protein serine/threonine kinase activity)	[T] Signal transduction mechanisms	K04733	ko04210(Apoptosis);ko04620(Toll-like receptor signaling pathway);ko04722(Neurotrophin signaling pathway);ko05140(Leishmaniasis);ko05142(Chagas disease)	155.15	158	161.53	85	56	145.31	8.64	7.7	6.4	4.82	4.87	5.58	158.227	95.4367	7.58	5.09	0.574532	0.574532	0.0478269	0.800877	no
comp12822_c0	comp12822_c0_seq1,comp12822_c0_seq2,comp12822_c0_seq3,comp12822_c0_seq4,comp12822_c0_seq5,comp12822_c0_seq6	2911	2702.76	Q54V77	CTP synthase	GO:0005524(ATP binding);GO:0003883(CTP synthase activity);GO:0006241(CTP biosynthetic process);GO:0006541(glutamine metabolic process);GO:0008654(phospholipid biosynthetic process);GO:0019856(pyrimidine base biosynthetic process)	[F] Nucleotide transport and metabolism	K01937	ko00240(Pyrimidine metabolism)	2406.24	2273.31	3526.91	2804.73	2092.29	4053.12	23.9	19.5	24.59	27.87	32.38	27.4	2735.49	2983.38	22.6633	29.2167	-0.366432	0.366432	0.0435523	0.800877	no
comp16918_c0	comp16918_c0_seq1	405	405	-	-	-	-	-	-	11	7	16	16.74	10	21	0.87	0.49	0.9	1.35	1.24	1.15	11.3333	15.9133	0.753333	1.24667	-0.726715	0.726715	0.047833	0.800877	no
comp15026_c0	comp15026_c0_seq1,comp15026_c0_seq10,comp15026_c0_seq11,comp15026_c0_seq12,comp15026_c0_seq13,comp15026_c0_seq14,comp15026_c0_seq15,comp15026_c0_seq16,comp15026_c0_seq17,comp15026_c0_seq18,comp15026_c0_seq19,comp15026_c0_seq2,comp15026_c0_seq20,comp15026_	1803	1002.54	-	-	-	-	-	-	1546.44	1429.64	2160.96	930.27	660.33	1362.19	42.78	34.38	41.71	26.86	28.06	25.61	1712.35	984.263	39.6233	26.8433	0.561786	0.561786	0.0329113	0.800877	no
comp10875_c0	comp10875_c0_seq1	288	288	-	-	-	-	-	-	17	22	25.58	15	10	22	2.09	2.36	2.23	1.88	1.92	1.86	21.5267	15.6667	2.22667	1.88667	0.239046	0.239046	0.0429252	0.800877	no
comp178555_c0	comp178555_c0_seq1	456	456	-	-	-	-	-	-	12	13	14	6.16	5	11	0.83	0.78	0.68	0.43	0.54	0.52	13	7.38667	0.763333	0.496667	0.620035	0.620035	0.0101659	0.800877	no
comp8866_c0	comp8866_c0_seq1,comp8866_c0_seq2	2364	2181.94	Q9LZI2	dTDP-glucose 4,6-dehydratase	-	[G] Carbohydrate transport and metabolism ;[M] Cell wall/membrane/envelope biogenesis	K01710	ko00521(Streptomycin biosynthesis);ko00523(Polyketide sugar unit biosynthesis);ko01055(Biosynthesis of vancomycin group antibiotics)	1550.68	2289.63	2325.73	2270.21	1575.76	3522.01	19.42	24.97	20.72	28.99	30.72	30.49	2055.35	2455.99	21.7033	30.0667	-0.470248	0.470248	0.0284456	0.800877	no
comp16903_c0	comp16903_c0_seq1,comp16903_c0_seq10,comp16903_c0_seq11,comp16903_c0_seq12,comp16903_c0_seq2,comp16903_c0_seq3,comp16903_c0_seq4,comp16903_c0_seq5,comp16903_c0_seq6,comp16903_c0_seq7,comp16903_c0_seq8,comp16903_c0_seq9	3741	3043.84	Q9FIX3	-	GO:0005488(binding)	[R] General function prediction only	-	-	1080.98	1093.83	1268.99	717.24	520.99	1136.48	9.5	8.26	7.93	6.38	7.2	6.91	1147.93	791.57	8.56333	6.83	0.326287	0.326287	0.0489966	0.800877	no
comp110457_c0	comp110457_c0_seq1	562	562	-	-	-	-	-	-	43.16	37.96	50.02	27	16	25	2.33	1.79	1.92	1.48	1.35	0.93	43.7133	22.6667	2.01333	1.25333	0.683816	0.683816	0.0308112	0.800877	no
comp15842_c1	comp15842_c1_seq1,comp15842_c1_seq10,comp15842_c1_seq11,comp15842_c1_seq12,comp15842_c1_seq13,comp15842_c1_seq14,comp15842_c1_seq15,comp15842_c1_seq16,comp15842_c1_seq17,comp15842_c1_seq18,comp15842_c1_seq19,comp15842_c1_seq2,comp15842_c1_seq20,comp15842_	4439	3295.42	Q9LET7	vesicle-fusing ATPase	-	[O] Posttranslational modification, protein turnover, chaperones	K06027	ko04962(Vasopressin-regulated water reabsorption)	1364.01	1610.46	1616.97	850.07	596.99	1359.03	10.13	9.6	8.07	5.96	7.1	6.59	1530.48	935.363	9.26667	6.55	0.500556	0.500556	0.0293511	0.800877	no
comp8996_c0	comp8996_c0_seq1	1489	1489	Q56WD9	acetyl-CoA acyltransferase	GO:0009507(chloroplast);GO:0009514(glyoxysome);GO:0005739(mitochondrion);GO:0005730(nucleolus);GO:0005774(vacuolar membrane);GO:0003988(acetyl-CoA C-acyltransferase activity);GO:0006635(fatty acid beta-oxidation);GO:0010111(glyoxysome organization);GO:000	[I] Lipid transport and metabolism	K00632	ko00071(Fatty acid metabolism);ko00280(Valine, leucine and isoleucine degradation);ko00281(Geraniol degradation);ko00281(Geraniol degradation);ko00362(Benzoate degradation via hydroxylation);ko00592(alpha-Linolenic acid metabolism);ko00642(Ethylbenzene de	651.13	1153.98	1593.72	1895.29	1193.93	2504.48	12.1	18.76	21.05	35.85	34.63	32.06	1132.94	1864.57	17.3033	34.18	-0.982102	0.982102	0.0139027	0.800877	no
comp310958_c0	comp310958_c0_seq1	530	530	-	-	-	-	-	-	8	12	15	7	3	10	0.46	0.61	0.61	0.41	0.27	0.4	11.6667	6.66667	0.56	0.36	0.63743	0.63743	0.0416744	0.800877	no
comp13484_c1	comp13484_c1_seq1,comp13484_c1_seq2	1620	1406.32	-	-	-	-	-	-	2227.14	2350.4	3075.59	1905.85	1162.21	2747.6	42.97	39.35	42.77	38.68	35.07	37.15	2551.04	1938.55	41.6967	36.9667	0.173707	0.173707	0.0403494	0.800877	no
comp9337_c0	comp9337_c0_seq1	943	943	-	-	-	-	-	-	37.26	36	49.98	19	8.91	31	1.13	0.95	1.07	0.59	0.42	0.65	41.08	19.6367	1.05	0.553333	0.924169	0.924169	0.00561561	0.800877	no
comp8239_c1	comp8239_c1_seq1	785	785	Q9LIR6	beta-amylase	GO:0009507(chloroplast);GO:0005829(cytosol);GO:0005634(nucleus);GO:0016161(beta-amylase activity);GO:0043169(cation binding);GO:0009414(response to water deprivation);GO:0005983(starch catabolic process)	-	K01177	ko00500(Starch and sucrose metabolism)	65	58.01	113.02	89.95	71.99	136.32	2.4	1.88	2.97	3.39	4.16	3.47	78.6767	99.42	2.41667	3.67333	-0.604071	0.604071	0.0373588	0.800877	no
comp1788_c0	comp1788_c0_seq1	325	325	-	-	-	-	-	-	5	3	6	8	4	11	0.52	0.27	0.45	0.85	0.65	0.79	4.66667	7.66667	0.413333	0.763333	-0.885007	0.885007	0.0231454	0.800877	no
comp9032_c1	comp9032_c1_seq1	686	686	P0C899	-	GO:0005488(binding)	[R] General function prediction only	-	-	29.99	23	33	17	7	13	1.29	0.86	1.01	0.74	0.47	0.38	28.6633	12.3333	1.05333	0.53	0.990898	0.990898	0.0355672	0.800877	no
comp16121_c0	comp16121_c0_seq1	249	249	-	-	-	-	-	-	20	25	21	9.62	6	17	3	3.29	2.24	1.47	1.41	1.76	22	10.8733	2.84333	1.54667	0.878421	0.878421	0.0417888	0.800877	no
comp134085_c0	comp134085_c0_seq1	1040	1040	-	-	-	-	-	-	23	24	29	7	7	23	0.63	0.57	0.56	0.19	0.3	0.43	25.3333	12.3333	0.586667	0.306667	0.93587	0.93587	0.0457187	0.800877	no
comp775_c1	comp775_c1_seq1	273	273	-	-	-	-	-	-	3	3	3	5	3	7	0.4	0.35	0.28	0.67	0.62	0.64	3	5	0.343333	0.643333	-0.905957	0.905957	0.00618015	0.800877	no
comp20034_c0	comp20034_c0_seq1	1302	1302	P24068	extracellular signal-regulated kinase 1/2	GO:0005634(nucleus);GO:0046983(protein dimerization activity);GO:0043565(sequence-specific DNA binding);GO:0003700(sequence-specific DNA binding transcription factor activity)	-	K04371	ko04010(MAPK signaling pathway);ko04012(ErbB signaling pathway);ko04013(MAPK signaling pathway - fly);ko04062(Chemokine signaling pathway);ko04114(Oocyte meiosis);ko04150(mTOR signaling pathway);ko04270(Vascular smooth muscle contraction);ko04320(Dorso-ve	1473.05	1488.98	2120.4	829.84	739.53	1634.94	31.54	27.89	32.27	18.09	24.71	24.11	1694.14	1068.1	30.5667	22.3033	0.4547	0.4547	0.0382565	0.800877	no
comp8168_c0	comp8168_c0_seq1,comp8168_c0_seq2	1223	1177.93	Q9SAH7	-	GO:0005634(nucleus);GO:0005515(protein binding);GO:0043565(sequence-specific DNA binding);GO:0003700(sequence-specific DNA binding transcription factor activity);GO:0042742(defense response to bacterium);GO:0050832(defense response to fungus);GO:0050691(r	-	-	-	272	281	410	169.16	68	190	6.31	5.66	6.84	3.98	2.45	2.99	321	142.387	6.27	3.14	0.997701	0.997701	0.00625863	0.800877	no
comp25083_c0	comp25083_c0_seq1	2373	2373	Q5M974	-	GO:0016874(ligase activity);GO:0008270(zinc ion binding)	[O] Posttranslational modification, protein turnover, chaperones	-	-	794.02	888.49	966.95	371.01	382	730.73	9.08	8.89	7.86	4.32	6.82	5.76	883.153	494.58	8.61	5.63333	0.612024	0.612024	0.0353639	0.800877	no
comp13372_c1	comp13372_c1_seq1	750	750	Q92544	-	GO:0016021(integral to membrane)	[U] Intracellular trafficking, secretion, and vesicular transport	-	-	459.18	420.96	638.77	555.33	331.72	823.81	17.86	14.33	17.66	21.99	20.14	22.07	506.303	570.287	16.6167	21.4	-0.36498	0.36498	0.0331686	0.800877	no
comp15933_c0	comp15933_c0_seq1,comp15933_c0_seq10,comp15933_c0_seq11,comp15933_c0_seq12,comp15933_c0_seq13,comp15933_c0_seq14,comp15933_c0_seq15,comp15933_c0_seq16,comp15933_c0_seq17,comp15933_c0_seq18,comp15933_c0_seq19,comp15933_c0_seq2,comp15933_c0_seq20,comp15933_	1790	1453.63	P48977	alcohol dehydrogenase	GO:0005737(cytoplasm);GO:0004022(alcohol dehydrogenase (NAD) activity);GO:0008270(zinc ion binding)	[Q] Secondary metabolites biosynthesis, transport and catabolism	K00001	ko00010(Glycolysis / Gluconeogenesis);ko00071(Fatty acid metabolism);ko00350(Tyrosine metabolism);ko00624(1- and 2-Methylnaphthalene degradation);ko00641(3-Chloroacrylic acid degradation);ko00830(Retinol metabolism);ko00980(Metabolism of xenobiotics by cy	494.49	533.08	725.05	653	380	883.4	9.41	8.75	9.57	12.43	10.89	11.19	584.207	638.8	9.24333	11.5033	-0.315567	0.315567	0.0233638	0.800877	no
comp25528_c0	comp25528_c0_seq1	641	641	-	-	-	-	-	-	113	107	161	38	43	117	5.24	4.34	5.31	1.79	3.11	3.74	127	66	4.96333	2.88	0.785241	0.785241	0.0479324	0.800877	no
comp230329_c0	comp230329_c0_seq1	980	980	-	-	-	-	-	-	37	59	63	18	13	45	1.07	1.5	1.3	0.53	0.59	0.9	53	25.3333	1.29	0.673333	0.937978	0.937978	0.0220554	0.800877	no
comp13395_c0	comp13395_c0_seq1,comp13395_c0_seq2,comp13395_c0_seq3,comp13395_c0_seq4,comp13395_c0_seq5	4479	3623.5	O23225	-	GO:0000151(ubiquitin ligase complex);GO:0005488(binding);GO:0004842(ubiquitin-protein ligase activity)	[S] Function unknown	-	-	3287.21	4640.03	4433.93	1925.92	1592	3796.04	23.89	29.3	22.8	14.1	17.89	18.87	4120.39	2437.99	25.33	16.9533	0.579278	0.579278	0.0321671	0.800877	no
comp19099_c0	comp19099_c0_seq1	2382	2382	Q9C9W9	flavin-binding kelch repeat F-box protein 1	GO:0005634(nucleus);GO:0009881(photoreceptor activity);GO:0005515(protein binding);GO:0007623(circadian rhythm);GO:0009911(positive regulation of flower development);GO:0018298(protein-chromophore linkage);GO:0006355(regulation of transcription, DNA-depen	-	K12116	ko04712(Circadian rhythm - plant)	8359.62	6638.28	8768.7	2381.39	2811.48	6524.58	95.23	66.17	71	27.61	49.99	51.2	7922.2	3905.82	77.4667	42.9333	0.851477	0.851477	0.0444603	0.800877	no
comp16851_c4	comp16851_c4_seq1	269	269	-	charged multivesicular body protein 1	-	[U] Intracellular trafficking, secretion, and vesicular transport	K12197	ko04144(Endocytosis)	238.78	235.33	330.26	151	128.68	257.63	32.19	27.76	31.65	20.72	27.08	23.93	268.123	179.103	30.5333	23.91	0.352771	0.352771	0.0492659	0.800877	no
comp12953_c0	comp12953_c0_seq1,comp12953_c0_seq2,comp12953_c0_seq3	2674	2315.09	Q9FJJ3	-	GO:0005739(mitochondrion);GO:0016363(nuclear matrix);GO:0003950(NAD+ ADP-ribosyltransferase activity);GO:0007275(multicellular organismal development);GO:0072593(reactive oxygen species metabolic process);GO:0009651(response to salt stress)	-	-	-	411.53	366	565.28	171	187.97	317	4.81	3.79	4.68	2.05	3.41	2.6	447.603	225.323	4.42667	2.68667	0.720403	0.720403	0.0285663	0.800877	no
comp15857_c0	comp15857_c0_seq1,comp15857_c0_seq2,comp15857_c0_seq3,comp15857_c0_seq4,comp15857_c0_seq5,comp15857_c0_seq6,comp15857_c0_seq7,comp15857_c0_seq8,comp15857_c0_seq9	5044	2488.54	P08799	myosin V	GO:0042641(actomyosin);GO:0005826(actomyosin contractile ring);GO:0032982(myosin filament);GO:0016460(myosin II complex);GO:0001931(uropod);GO:0051015(actin filament binding);GO:0030898(actin-dependent ATPase activity);GO:0005524(ATP binding);GO:0005516(c	[Z] Cytoskeleton	K10357	-	484.92	496.89	582.07	718	444.66	927.03	4.42	3.57	3.74	5.98	5.66	5.16	521.293	696.563	3.91	5.6	-0.518258	0.518258	0.00885243	0.800877	no
comp11967_c1	comp11967_c1_seq1	1465	1465	Q02909	phosphoenolpyruvate carboxylase	GO:0005737(cytoplasm);GO:0008964(phosphoenolpyruvate carboxylase activity);GO:0015977(carbon fixation);GO:0015979(photosynthesis);GO:0006099(tricarboxylic acid cycle)	-	K01595	ko00620(Pyruvate metabolism);ko00710(Carbon fixation in photosynthetic organisms);ko00720(Reductive carboxylate cycle (CO2 fixation))	1151.01	1326.08	1860.59	1982.61	1032.94	2499.45	21.75	21.93	25	38.15	30.47	32.54	1445.89	1838.33	22.8933	33.72	-0.558677	0.558677	0.0265915	0.800877	no
comp5844_c0	comp5844_c0_seq1,comp5844_c0_seq2	2406	2274.99	-	-	-	-	-	-	1414.32	2030.61	1774.84	643.7	706.81	706.04	16.68	20.88	14.99	7.68	13.15	5.71	1739.92	685.517	17.5167	8.84667	0.985522	0.985522	0.0403705	0.800877	no
comp15793_c0	comp15793_c0_seq1	506	506	-	-	-	-	-	-	6	10	12	16	7	20	0.37	0.53	0.52	0.99	0.66	0.84	9.33333	14.3333	0.473333	0.83	-0.810255	0.810255	0.0444055	0.800877	no
comp13559_c0	comp13559_c0_seq1,comp13559_c0_seq2,comp13559_c0_seq3,comp13559_c0_seq4	4568	4045.76	Q32NW2	-	-	[K] Transcription	-	-	4078.25	4552.08	5217.85	3128.25	2245.95	5232.68	26.84	26.28	24.53	20.97	22.95	23.7	4616.06	3535.63	25.8833	22.54	0.199536	0.199536	0.0366545	0.800877	no
comp12274_c0	comp12274_c0_seq1,comp12274_c0_seq2,comp12274_c0_seq3,comp12274_c0_seq4	689	611.54	-	-	-	-	-	-	20	17	29	13	6	17	0.9	0.83	1.05	0.64	0.45	0.64	22	12	0.926667	0.576667	0.684313	0.684313	0.0181693	0.800877	no
comp114274_c0	comp114274_c0_seq1	380	380	-	-	-	-	-	-	1	1	1	2	1	2	0.09	0.08	0.06	0.17	0.13	0.12	1	1.66667	0.0766667	0.14	-0.868755	0.868755	0.0333003	0.800877	no
comp178735_c0	comp178735_c0_seq1	725	725	-	-	-	-	-	-	25	35	39	20	6	20	1.01	1.24	1.12	0.82	0.38	0.56	33	15.3333	1.12333	0.586667	0.937173	0.937173	0.0334662	0.800877	no
comp13271_c0	comp13271_c0_seq1	322	322	-	-	-	-	-	-	39	37	46.91	14	11	30.78	4.13	3.43	3.53	1.51	1.82	2.25	40.97	18.5933	3.69667	1.86	0.990922	0.990922	0.00389497	0.800877	no
comp24905_c0	comp24905_c0_seq1	2352	2352	P53393	sulfate permease, SulP family	GO:0016021(integral to membrane);GO:0008271(secondary active sulfate transmembrane transporter activity)	[P] Inorganic ion transport and metabolism	K03321	-	708.16	902.52	906.88	414.06	248.32	719	8.17	9.11	7.44	4.86	4.47	5.72	839.187	460.46	8.24	5.01667	0.715915	0.715915	0.00732813	0.800877	no
comp5442_c0	comp5442_c0_seq1,comp5442_c0_seq2	2510	2451.07	-	MAternally affected uncoordination	-	[S] Function unknown	K11266	-	2264.27	2435.61	2803.03	1614.63	1190	2645.36	24.8	23.32	21.78	17.86	20.22	19.91	2500.97	1816.66	23.3	19.33	0.269488	0.269488	0.0266504	0.800877	no
comp9355_c1	comp9355_c1_seq1,comp9355_c1_seq2	1781	1651.67	Q9C5S2	serine/threonine-protein kinase/endoribonuclease IRE1	-	[T] Signal transduction mechanisms	K08852	ko05010(Alzheimer's disease)	793.75	848.03	1005.98	593.64	337	875.08	13.27	12.4	11.96	10.11	8.85	10.08	882.587	601.907	12.5433	9.68	0.373842	0.373842	0.00729839	0.800877	no
comp16279_c0	comp16279_c0_seq1,comp16279_c0_seq10,comp16279_c0_seq11,comp16279_c0_seq12,comp16279_c0_seq13,comp16279_c0_seq14,comp16279_c0_seq15,comp16279_c0_seq16,comp16279_c0_seq17,comp16279_c0_seq18,comp16279_c0_seq19,comp16279_c0_seq2,comp16279_c0_seq20,comp16279_	4680	2990.44	Q64514	tripeptidyl-peptidase II	GO:0005737(cytoplasm);GO:0005634(nucleus);GO:0004177(aminopeptidase activity);GO:0004252(serine-type endopeptidase activity);GO:0006508(proteolysis)	[O] Posttranslational modification, protein turnover, chaperones	K01280	-	7913.32	8296.59	10424.6	5199.89	4241.09	10051.1	64.53	57.04	54.61	36.51	47.18	47.54	8878.16	6497.35	58.7267	43.7433	0.424953	0.424953	0.0347799	0.800877	no
comp562368_c0	comp562368_c0_seq1	282	282	-	-	-	-	-	-	4	4	5	2	1	4	0.51	0.44	0.45	0.26	0.2	0.35	4.33333	2.33333	0.466667	0.27	0.789433	0.789433	0.028358	0.800877	no
comp18633_c0	comp18633_c0_seq1	1896	1896	P14749	alpha-galactosidase	GO:0043169(cation binding);GO:0052692(raffinose alpha-galactosidase activity);GO:0005975(carbohydrate metabolic process)	[G] Carbohydrate transport and metabolism	K07407	ko00052(Galactose metabolism);ko00561(Glycerolipid metabolism);ko00600(Sphingolipid metabolism);ko00603(Glycosphingolipid biosynthesis - globo series)	4210.71	4253.19	4716.93	2502.1	1815.88	4498.8	60.76	53.7	48.38	36.75	40.9	44.72	4393.61	2938.93	54.28	40.79	0.412205	0.412205	0.0424448	0.800877	no
comp356_c0	comp356_c0_seq1	264	264	-	-	-	-	-	-	3	4	6	6	5	8	0.42	0.48	0.59	0.85	1.08	0.76	4.33333	6.33333	0.496667	0.896667	-0.852294	0.852294	0.0334764	0.800877	no
comp226089_c0	comp226089_c0_seq1	415	415	P10978	-	GO:0004190(aspartic-type endopeptidase activity);GO:0003677(DNA binding);GO:0004519(endonuclease activity);GO:0003964(RNA-directed DNA polymerase activity);GO:0008270(zinc ion binding);GO:0015074(DNA integration)	[R] General function prediction only	-	-	13	11.1	14	4	5	7	1	0.75	0.77	0.31	0.6	0.37	12.7	5.33333	0.84	0.426667	0.97728	0.97728	0.0261291	0.800877	no
comp429374_c0	comp429374_c0_seq1	492	492	-	-	-	[R] General function prediction only	-	-	9	8	13	12	7	16	0.57	0.44	0.58	0.77	0.69	0.69	10	11.6667	0.53	0.716667	-0.43531	0.43531	0.0332033	0.800877	no
comp24866_c0	comp24866_c0_seq1	2407	2407	-	-	-	-	-	-	424.97	503.99	720.81	543.35	424.91	931.7	4.79	4.97	5.77	6.23	7.47	7.23	549.923	633.32	5.17667	6.97667	-0.430514	0.430514	0.0225066	0.800877	no
comp14705_c1	comp14705_c1_seq1,comp14705_c1_seq2,comp14705_c1_seq3,comp14705_c1_seq4,comp14705_c1_seq5	721	610.5	-	-	-	-	-	-	51	41.77	59.05	23	16	26.95	2.33	1.84	2.05	1.29	1.2	1.01	50.6067	21.9833	2.07333	1.16667	0.82956	0.82956	0.00973214	0.800877	no
comp44280_c0	comp44280_c0_seq1	1085	1085	-	-	-	-	-	-	72	104.12	94	25	38	51.97	1.87	2.37	1.74	0.66	1.54	0.93	90.04	38.3233	1.99333	1.04333	0.933983	0.933983	0.0471277	0.800877	no
comp13291_c0	comp13291_c0_seq1,comp13291_c0_seq2	1557	908.31	Q5XF09	-	GO:0016021(integral to membrane);GO:0008643(carbohydrate transport)	[G] Carbohydrate transport and metabolism ;[E] Amino acid transport and metabolism	-	-	83	62.01	146	137.5	93.01	231	3.74	2.17	4.61	6.23	7.33	6.43	97.0033	153.837	3.50667	6.66333	-0.926144	0.926144	0.0307828	0.800877	no
comp12988_c0	comp12988_c0_seq1,comp12988_c0_seq2,comp12988_c0_seq3,comp12988_c0_seq4,comp12988_c0_seq5,comp12988_c0_seq6,comp12988_c0_seq7,comp12988_c0_seq8	2860	2687.95	-	-	-	[A] RNA processing and modification	K01529	-	2121.91	2070.86	2569.92	1486.69	1071	2171.13	21.36	18.31	18.34	15.12	16.62	15.09	2254.23	1576.27	19.3367	15.61	0.308869	0.308869	0.0472765	0.800877	no
comp12740_c1	comp12740_c1_seq1	921	921	Q7PC88	small multidrug resistance protein, SMR family	GO:0016021(integral to membrane);GO:0009506(plasmodesma);GO:0005524(ATP binding);GO:0016887(ATPase activity);GO:0006810(transport)	[Q] Secondary metabolites biosynthesis, transport and catabolism	K03297	-	67	75.05	67	16	27.44	50	2.08	2.04	1.48	0.51	1.33	1.07	69.6833	31.1467	1.86667	0.97	0.944408	0.944408	0.0469881	0.800877	no
comp883_c0	comp883_c0_seq1	1279	1279	-	-	-	-	-	-	94.58	90	111	39.94	37	79	2.06	1.72	1.72	0.89	1.26	1.19	98.5267	51.98	1.83333	1.11333	0.719584	0.719584	0.0109118	0.800877	no
comp5607_c0	comp5607_c0_seq1	1800	1800	Q9M8S6	ankyrin	GO:0016021(integral to membrane);GO:0015271(outward rectifier potassium channel activity)	[P] Inorganic ion transport and metabolism ;[T] Signal transduction mechanisms	K10380	-	307.13	249.75	313.88	120	108	198.91	4.68	3.33	3.4	1.86	2.57	2.09	290.253	142.303	3.80333	2.17333	0.807355	0.807355	0.0470736	0.800877	no
comp18563_c0	comp18563_c0_seq1	2581	2581	O64894	acyl-CoA oxidase	GO:0009514(glyoxysome);GO:0003995(acyl-CoA dehydrogenase activity);GO:0003997(acyl-CoA oxidase activity);GO:0050660(flavin adenine dinucleotide binding);GO:0006635(fatty acid beta-oxidation)	[I] Lipid transport and metabolism ;[Q] Secondary metabolites biosynthesis, transport and catabolism	K00232	ko00071(Fatty acid metabolism);ko00592(alpha-Linolenic acid metabolism);ko01040(Biosynthesis of unsaturated fatty acids);ko03320(PPAR signaling pathway);ko04146(Peroxisome)	4251.08	4899.86	5189.16	2040.5	1958.88	4155.36	44.58	44.96	38.68	21.78	32.06	30.02	4780.03	2718.25	42.74	27.9533	0.612567	0.612567	0.0226153	0.800877	no
comp22133_c0	comp22133_c0_seq1	2200	2200	Q03194	H+-transporting ATPase	GO:0016021(integral to membrane);GO:0005886(plasma membrane);GO:0005524(ATP binding);GO:0008553(hydrogen-exporting ATPase activity, phosphorylative mechanism);GO:0046872(metal ion binding);GO:0006754(ATP biosynthetic process)	[P] Inorganic ion transport and metabolism	K01535	ko00190(Oxidative phosphorylation)	2339.24	3013.78	3066.29	811.67	991.67	2388.83	28.93	32.61	26.95	10.22	19.14	20.35	2806.44	1397.39	29.4967	16.57	0.831978	0.831978	0.0368746	0.800877	no
comp15986_c0	comp15986_c0_seq1,comp15986_c0_seq10,comp15986_c0_seq11,comp15986_c0_seq12,comp15986_c0_seq13,comp15986_c0_seq14,comp15986_c0_seq15,comp15986_c0_seq16,comp15986_c0_seq17,comp15986_c0_seq18,comp15986_c0_seq19,comp15986_c0_seq2,comp15986_c0_seq20,comp15986_	3273	3020.92	Q5S1W2	histidyl-tRNA synthetase	GO:0005886(plasma membrane);GO:0006952(defense response)	[T] Signal transduction mechanisms	K01892	ko00970(Aminoacyl-tRNA biosynthesis)	4074.05	4086.77	5308.03	3178.43	2108.63	4926.22	36.19	32.34	34.02	29.24	29.49	30.66	4489.62	3404.43	34.1833	29.7967	0.198142	0.198142	0.0444021	0.800877	no
comp1535_c0	comp1535_c0_seq1	772	772	-	-	-	-	-	-	23	34	44	9	14	20	0.87	1.12	1.18	0.35	0.82	0.52	33.6667	14.3333	1.05667	0.563333	0.90746	0.90746	0.0484187	0.800877	no
comp16783_c5	comp16783_c5_seq1	341	341	-	-	-	-	-	-	118.2	89.79	147	42	45	73.94	11.64	7.74	10.29	4.21	6.92	5.02	118.33	53.6467	9.89	5.38333	0.877471	0.877471	0.0375466	0.800877	no
comp27311_c0	comp27311_c0_seq1	2785	2785	P92960	-	GO:0005783(endoplasmic reticulum);GO:0016021(integral to membrane);GO:0005886(plasma membrane);GO:0005249(voltage-gated potassium channel activity);GO:0010163(high-affinity potassium ion import);GO:0009624(response to nematode)	[P] Inorganic ion transport and metabolism ;[T] Signal transduction mechanisms	-	-	599	522	687.41	298	208	516.8	5.81	4.43	4.74	2.94	3.15	3.45	602.803	340.933	4.99333	3.18	0.650976	0.650976	0.0373075	0.800877	no
comp9752_c0	comp9752_c0_seq1,comp9752_c0_seq2	702	668.34	Q9M995	endoglucanase	GO:0005576(extracellular region);GO:0030246(carbohydrate binding);GO:0008810(cellulase activity);GO:0007047(cellular cell wall organization);GO:0030245(cellulose catabolic process)	-	K01179	ko00500(Starch and sucrose metabolism)	12	18	18	15.13	11	25	0.58	0.66	0.57	0.68	0.72	0.76	16	17.0433	0.603333	0.72	-0.255042	0.255042	0.0355001	0.800877	no
comp10444_c0	comp10444_c0_seq1,comp10444_c0_seq2,comp10444_c0_seq3	1970	1725.38	Q6AWW5	receptor-interacting serine/threonine-protein kinase 4	GO:0005783(endoplasmic reticulum);GO:0016021(integral to membrane);GO:0005886(plasma membrane)	[R] General function prediction only	K08848	-	230	299	437.58	312.97	230	521.03	4.06	4.28	4.85	5.16	5.97	5.99	322.193	354.667	4.39667	5.70667	-0.376238	0.376238	0.0229827	0.800877	no
comp155007_c0	comp155007_c0_seq1	1661	1661	-	-	-	-	-	-	44.77	60.88	63	28	21	49	0.74	0.88	0.74	0.47	0.54	0.56	56.2167	32.6667	0.786667	0.523333	0.588022	0.588022	0.0139528	0.800877	no
comp15873_c0	comp15873_c0_seq1,comp15873_c0_seq10,comp15873_c0_seq11,comp15873_c0_seq12,comp15873_c0_seq13,comp15873_c0_seq14,comp15873_c0_seq15,comp15873_c0_seq16,comp15873_c0_seq17,comp15873_c0_seq18,comp15873_c0_seq19,comp15873_c0_seq2,comp15873_c0_seq20,comp15873_	6006	5170.9	Q9FY48	ankyrin	GO:0005769(early endosome);GO:0005802(trans-Golgi network);GO:0005524(ATP binding);GO:0043621(protein self-association);GO:0004674(protein serine/threonine kinase activity);GO:0004842(ubiquitin-protein ligase activity);GO:0008270(zinc ion binding);GO:0009	-	K10380	-	5522.34	6367.86	8266.52	6578.7	4548.08	9848.73	27.62	27.77	29.9	33.4	35.55	34.07	6718.91	6991.84	28.43	34.34	-0.272476	0.272476	0.00396667	0.800877	no
comp4656_c1	comp4656_c1_seq1,comp4656_c1_seq2	881	819.29	-	-	-	-	-	-	23	19	28	13	12	15	0.75	0.69	0.9	0.43	0.61	0.34	23.3333	13.3333	0.78	0.46	0.76184	0.76184	0.0365531	0.800877	no
comp81588_c0	comp81588_c0_seq1	378	378	-	-	-	-	-	-	33	30	40	13	12	32	2.85	2.27	2.46	1.14	1.62	1.91	34.3333	19	2.52667	1.55667	0.698775	0.698775	0.0293502	0.800877	no
comp16376_c0	comp16376_c0_seq1,comp16376_c0_seq2	1086	1079.35	-	-	-	-	-	-	200.05	178	209.01	91.97	80.1	158	5.23	4.06	3.88	2.45	3.27	2.85	195.687	110.023	4.39	2.85667	0.619888	0.619888	0.0477068	0.800877	no
comp16180_c0	comp16180_c0_seq1,comp16180_c0_seq2,comp16180_c0_seq3,comp16180_c0_seq4,comp16180_c0_seq5	1995	1706.82	P83304	-	GO:0005536(glucose binding);GO:0005537(mannose binding);GO:0000771(agglutination involved in conjugation)	-	-	-	320.39	275.99	355	139	123	195	5.03	3.75	4.17	2.27	2.94	1.95	317.127	152.333	4.31667	2.38667	0.854921	0.854921	0.0174568	0.800877	no
comp4923_c0	comp4923_c0_seq1	2367	2367	-	-	-	-	-	-	103.98	141	170	69	57	130.5	1.19	1.41	1.39	0.81	1.02	1.03	138.327	85.5	1.33	0.953333	0.480374	0.480374	0.0199265	0.800877	no
comp32600_c0	comp32600_c0_seq1	944	944	P0C8Z0	-	-	-	-	-	109.01	96	115.07	65	26	93	3.29	2.54	2.47	2	1.23	1.94	106.693	61.3333	2.76667	1.72333	0.682947	0.682947	0.0445982	0.800877	no
comp8511_c0	comp8511_c0_seq1,comp8511_c0_seq2	950	945.76	-	-	-	-	-	-	429.01	373.45	601.06	175.07	137	334.27	12.93	9.85	12.87	5.38	6.44	6.96	467.84	215.447	11.8833	6.26	0.924705	0.924705	0.017821	0.800877	no
comp437491_c0	comp437491_c0_seq1	407	407	-	-	-	-	-	-	9.86	12	14	5	3	9	0.78	0.83	0.79	0.4	0.37	0.49	11.9533	5.66667	0.8	0.42	0.929611	0.929611	0.00358216	0.800877	no
comp22386_c0	comp22386_c0_seq1	1077	1077	Q9SXS8	EREBP-like factor	GO:0005634(nucleus);GO:0003677(DNA binding);GO:0003700(sequence-specific DNA binding transcription factor activity);GO:0006952(defense response);GO:0009873(ethylene mediated signaling pathway)	-	K09286	-	197.02	221.93	270	221.88	148.71	367.85	5.16	5.09	5.03	5.92	6.08	6.64	229.65	246.147	5.09333	6.21333	-0.286757	0.286757	0.0327852	0.800877	no
comp12338_c0	comp12338_c0_seq1	226	226	-	-	-	-	-	-	33.53	32.19	39	17	10.02	18	5.8	4.87	4.79	2.99	2.7	2.14	34.9067	15.0067	5.15333	2.61	0.981456	0.981456	0.00419375	0.800877	no
comp6578_c0	comp6578_c0_seq1,comp6578_c0_seq2	473	445.62	-	-	-	-	-	-	47	47.01	73.97	20	23	38	3.26	2.71	3.6	1.49	2.37	1.72	55.9933	27	3.19	1.86	0.778254	0.778254	0.0228156	0.800877	no
comp28448_c0	comp28448_c0_seq1	1627	1627	Q9FFN2	-	GO:0000139(Golgi membrane);GO:0016021(integral to membrane);GO:0016757(transferase activity, transferring glycosyl groups);GO:0007047(cellular cell wall organization)	[G] Carbohydrate transport and metabolism ;[M] Cell wall/membrane/envelope biogenesis ;[W] Extracellular structures	-	-	350	364.89	607.43	508.04	283.93	752.99	5.93	5.4	7.31	8.76	7.5	8.78	440.773	514.987	6.21333	8.34667	-0.425833	0.425833	0.043928	0.800877	no
comp6890_c0	comp6890_c0_seq1,comp6890_c0_seq2	2684	2657.29	Q9LIC3	-	GO:0005739(mitochondrion);GO:0005488(binding)	[R] General function prediction only	-	-	157	168.03	177.97	98.05	74	168.01	1.58	1.49	1.31	1.03	1.19	1.17	167.667	113.353	1.46	1.13	0.369646	0.369646	0.0323161	0.800877	no
comp20442_c0	comp20442_c0_seq1	4296	4296	Q9LF24	-	-	-	-	-	4592.51	4804.05	7350.48	2848.19	1629.76	4964.73	28.6	26.18	32.54	18.05	15.84	21.3	5582.35	3147.56	29.1067	18.3967	0.661905	0.661905	0.0124103	0.800877	no
comp171191_c0	comp171191_c0_seq1	1076	1076	-	-	-	-	-	-	18	28	43	43	32	70	0.47	0.64	0.8	1.15	1.31	1.27	29.6667	48.3333	0.636667	1.24333	-0.965603	0.965603	0.0112242	0.800877	no
comp295881_c0	comp295881_c0_seq1	777	777	-	-	-	-	-	-	17	14	24	8	7	12	0.64	0.46	0.64	0.3	0.41	0.31	18.3333	9	0.58	0.34	0.770518	0.770518	0.0365074	0.800877	no
comp18435_c0	comp18435_c0_seq1	1735	1735	Q8RXN3	-	GO:0031969(chloroplast membrane);GO:0016021(integral to membrane);GO:0005739(mitochondrion);GO:0009528(plastid inner membrane);GO:0015121(phosphoenolpyruvate:phosphate antiporter activity);GO:0015120(phosphoglycerate transmembrane transporter activity);GO	[G] Carbohydrate transport and metabolism ;[E] Amino acid transport and metabolism	-	-	3039.81	3110.9	4411.94	4303.57	2438.66	6651.29	48.11	43.09	49.64	69.34	60.25	72.53	3520.88	4464.51	46.9467	67.3733	-0.521155	0.521155	0.0155261	0.800877	no
comp27767_c0	comp27767_c0_seq1	3310	3310	P93648	Lon-like ATP-dependent protease	GO:0005759(mitochondrial matrix);GO:0005524(ATP binding);GO:0004176(ATP-dependent peptidase activity);GO:0003677(DNA binding);GO:0004252(serine-type endopeptidase activity);GO:0006508(proteolysis)	[O] Posttranslational modification, protein turnover, chaperones	K08675	-	1216.4	1282.86	1564.67	1471.5	934.98	1901.03	9.88	9.12	9.04	12.17	11.86	10.64	1354.64	1435.84	9.34667	11.5567	-0.306201	0.306201	0.0232797	0.800877	no
comp21552_c0	comp21552_c0_seq1	4433	4433	Q9LVK9	phospholipid-translocating ATPase	GO:0016021(integral to membrane);GO:0005524(ATP binding);GO:0015662(ATPase activity, coupled to transmembrane movement of ions, phosphorylative mechanism);GO:0000287(magnesium ion binding);GO:0004012(phospholipid-translocating ATPase activity);GO:0006754(	[R] General function prediction only	K01530	-	1646.25	2020.04	2739.11	2324.06	1394.91	3650.72	9.93	10.66	11.74	14.27	13.13	15.17	2135.13	2456.56	10.7767	14.19	-0.396964	0.396964	0.0128283	0.800877	no
comp398_c0	comp398_c0_seq1	281	281	-	-	-	-	-	-	12	12	14.25	5	4	8	1.52	1.33	1.29	0.65	0.79	0.7	12.75	5.66667	1.38	0.713333	0.95202	0.95202	0.00304804	0.800877	no
comp15965_c0	comp15965_c0_seq1,comp15965_c0_seq10,comp15965_c0_seq2,comp15965_c0_seq3,comp15965_c0_seq4,comp15965_c0_seq5,comp15965_c0_seq6,comp15965_c0_seq7,comp15965_c0_seq8,comp15965_c0_seq9	3060	2772.47	-	-	-	-	-	-	757.97	776.1	851.38	463.32	350.1	766.67	7.2	6.8	6.03	4.5	5.34	5.02	795.15	526.697	6.67667	4.95333	0.430728	0.430728	0.0183901	0.800877	no
comp26220_c0	comp26220_c0_seq1	1752	1752	-	-	-	-	-	-	739	684.19	841.97	398.89	318	573.36	11.58	9.38	9.38	6.36	7.78	6.19	755.053	430.083	10.1133	6.77667	0.577611	0.577611	0.024754	0.800877	no
comp20921_c0	comp20921_c0_seq1	2390	2390	Q9CAG8	kelch-like protein 19	-	[R] General function prediction only	K10456	ko04120(Ubiquitin mediated proteolysis)	3824.09	3560.03	4782.3	2284.54	1026	3655.65	43.41	35.36	38.59	26.4	18.18	28.59	4055.47	2322.06	39.12	24.39	0.681617	0.681617	0.0233401	0.800877	no
comp69070_c0	comp69070_c0_seq1	1584	1584	-	-	-	-	-	-	90.12	77	120.43	52	32	93	1.57	1.17	1.49	0.92	0.87	1.12	95.85	59	1.41	0.97	0.539639	0.539639	0.0477474	0.800877	no
comp27976_c0	comp27976_c0_seq1	1176	1176	-	-	-	[U] Intracellular trafficking, secretion, and vesicular transport	-	-	313	339	430.98	327	224	495	7.47	7.08	7.31	7.94	8.34	8.14	360.993	348.667	7.28667	8.14	-0.15977	0.15977	0.00618744	0.800877	no
comp118814_c0	comp118814_c0_seq1	1509	1509	-	-	-	-	-	-	64	51	70	32	15	39	1.17	0.82	0.91	0.6	0.43	0.49	61.6667	28.6667	0.966667	0.506667	0.931982	0.931982	0.03143	0.800877	no
comp15945_c0	comp15945_c0_seq1,comp15945_c0_seq10,comp15945_c0_seq11,comp15945_c0_seq12,comp15945_c0_seq13,comp15945_c0_seq14,comp15945_c0_seq15,comp15945_c0_seq16,comp15945_c0_seq17,comp15945_c0_seq18,comp15945_c0_seq19,comp15945_c0_seq2,comp15945_c0_seq20,comp15945_	4781	3346.18	F4K1G2	D-alanine-poly(phosphoribitol) ligase	-	[Q] Secondary metabolites biosynthesis, transport and catabolism	K03367	ko00473(D-Alanine metabolism)	989.11	1110.97	1393.49	901.56	536.65	1309.98	7.85	8.13	7.95	7.41	6.64	7.14	1164.52	916.063	7.97667	7.06333	0.175437	0.175437	0.0430347	0.800877	no
comp11982_c0	comp11982_c0_seq1,comp11982_c0_seq2,comp11982_c0_seq3	2083	1200.09	-	-	-	-	-	-	893.99	1008.25	1390.16	1107.03	625.33	1481.22	20.92	20.96	23.57	27.05	24.89	25.66	1097.47	1071.19	21.8167	25.8667	-0.245663	0.245663	0.023704	0.800877	no
comp36628_c0	comp36628_c0_seq1	419	419	-	-	-	-	-	-	100	111.9	166.99	69.24	28	80.22	7.62	7.46	9.05	5.37	3.33	4.21	126.297	59.1533	8.04333	4.30333	0.902339	0.902339	0.0091028	0.800877	no
comp13857_c0	comp13857_c0_seq1,comp13857_c0_seq2,comp13857_c0_seq3,comp13857_c0_seq4	348	290.17	-	-	-	-	-	-	28.19	30.07	42.09	45.01	28.16	60.92	4	3.81	4.05	5.77	5.52	5.12	33.45	44.6967	3.95333	5.47	-0.468471	0.468471	0.0081365	0.800877	no
comp13214_c0	comp13214_c0_seq1,comp13214_c0_seq2,comp13214_c0_seq3,comp13214_c0_seq4,comp13214_c0_seq5,comp13214_c0_seq6,comp13214_c0_seq7,comp13214_c0_seq8	3670	3173.03	Q9LK27	E1A/CREB-binding protein	GO:0009507(chloroplast);GO:0005634(nucleus);GO:0006355(regulation of transcription, DNA-dependent);GO:0006351(transcription, DNA-dependent)	[K] Transcription	K04498	ko04110(Cell cycle);ko04310(Wnt signaling pathway);ko04330(Notch signaling pathway);ko04350(TGF-beta signaling pathway);ko04520(Adherens junction);ko04630(Jak-STAT signaling pathway);ko04720(Long-term potentiation);ko04916(Melanogenesis);ko05016(Huntingto	9624.89	10992.5	12279.4	7540.53	5194.01	11832.6	82.54	82.13	74.52	66.25	69.67	70.05	10965.6	8189.03	79.73	68.6567	0.215723	0.215723	0.0344222	0.800877	no
comp427087_c0	comp427087_c0_seq1	735	735	-	-	-	-	-	-	16	19	21	10	7	19	0.64	0.66	0.59	0.4	0.43	0.52	18.6667	12	0.63	0.45	0.485427	0.485427	0.0199733	0.800877	no
comp8394_c0	comp8394_c0_seq1	346	346	-	-	-	-	-	-	10	9	12	3	4	8	0.97	0.76	0.82	0.3	0.6	0.53	10.3333	5	0.85	0.476667	0.834482	0.834482	0.0330319	0.800877	no
comp80260_c0	comp80260_c0_seq1	288	288	-	-	-	-	-	-	40.04	39.4	43	13.4	11	34	4.92	4.24	3.76	1.68	2.11	2.88	40.8133	19.4667	4.30667	2.22333	0.953847	0.953847	0.0128527	0.800877	no
comp14867_c0	comp14867_c0_seq1,comp14867_c0_seq2,comp14867_c0_seq3,comp14867_c0_seq4,comp14867_c0_seq5,comp14867_c0_seq6	2518	2009.04	-	-	-	-	-	-	354.49	354.2	522.46	501.25	381	645.95	4.53	3.83	4.48	6.21	7.12	5.34	410.383	509.4	4.28	6.22333	-0.540077	0.540077	0.0465593	0.800877	no
comp16211_c2	comp16211_c2_seq1,comp16211_c2_seq2,comp16211_c2_seq3,comp16211_c2_seq4	2782	1697.13	Q500Y9	-	GO:0005829(cytosol);GO:0005524(ATP binding);GO:0003951(NAD+ kinase activity);GO:0042736(NADH kinase activity);GO:0006741(NADP biosynthetic process)	[R] General function prediction only	-	-	787.05	721.24	914.72	584	361	791.7	13.06	11.44	11.2	10.03	9.09	8.99	807.67	578.9	11.9	9.37	0.344841	0.344841	0.0297987	0.800877	no
comp10331_c0	comp10331_c0_seq1,comp10331_c0_seq2,comp10331_c0_seq3,comp10331_c0_seq4,comp10331_c0_seq5	1380	1192.77	Q5W6R4	EREBP-like factor	GO:0005634(nucleus);GO:0003677(DNA binding);GO:0003700(sequence-specific DNA binding transcription factor activity);GO:0045893(positive regulation of transcription, DNA-dependent);GO:0009408(response to heat);GO:0009651(response to salt stress);GO:0009414	-	K09286	-	367.04	308.9	411.79	125	134.02	222.65	8.37	6.41	7.27	3.5	5.21	3.98	362.577	160.557	7.35	4.23	0.797087	0.797087	0.0152892	0.800877	no
comp16170_c0	comp16170_c0_seq1	2219	2219	-	-	-	-	-	-	107.01	101.07	135.71	71	37	88.72	1.31	1.08	1.18	0.89	0.71	0.75	114.597	65.5733	1.19	0.783333	0.603263	0.603263	0.0100272	0.800877	no
comp306643_c0	comp306643_c0_seq1	458	458	-	-	-	-	-	-	7	10.98	13	6	2	7	0.48	0.66	0.63	0.42	0.21	0.33	10.3267	5	0.59	0.32	0.882643	0.882643	0.031018	0.800877	no
comp15272_c0	comp15272_c0_seq1,comp15272_c0_seq2,comp15272_c0_seq3,comp15272_c0_seq4,comp15272_c0_seq5	4311	3690.18	Q9LQV2	RNA-dependent RNA polymerase 1	GO:0000166(nucleotide binding);GO:0003723(RNA binding);GO:0003968(RNA-directed RNA polymerase activity);GO:0006952(defense response);GO:0031047(gene silencing by RNA);GO:0060148(positive regulation of posttranscriptional gene silencing);GO:0009751(respons	[A] RNA processing and modification	K11699	-	210	268	257	162	60	158	1.47	1.81	1.26	1.17	0.64	0.77	245	126.667	1.51333	0.86	0.815321	0.815321	0.0445703	0.800877	no
comp9808_c0	comp9808_c0_seq1,comp9808_c0_seq2,comp9808_c0_seq3,comp9808_c0_seq4,comp9808_c0_seq5,comp9808_c0_seq6,comp9808_c0_seq7,comp9808_c0_seq8	1905	1706.91	Q9HGM9	DnaJ homolog, subfamily C, member 3	GO:0005829(cytosol);GO:0031072(heat shock protein binding);GO:0051082(unfolded protein binding);GO:0006457(protein folding)	[O] Posttranslational modification, protein turnover, chaperones	K09523	-	657.24	648.96	966.1	871.99	576.02	1239.23	10.6	9.5	10.83	14.15	14.55	13.59	757.433	895.747	10.31	14.0967	-0.45131	0.45131	0.00260751	0.800877	no
comp247517_c0	comp247517_c0_seq1	692	692	-	-	-	-	-	-	10	10	11	5	4	10	0.43	0.37	0.33	0.22	0.27	0.29	10.3333	6.33333	0.376667	0.26	0.534777	0.534777	0.0357571	0.800877	no
comp96465_c0	comp96465_c0_seq1	536	536	-	-	-	-	-	-	29	25	33	13.06	12	12	1.65	1.24	1.33	0.76	1.07	0.47	29	12.3533	1.40667	0.766667	0.875609	0.875609	0.0451941	0.800877	no
comp181864_c0	comp181864_c0_seq1	1737	1737	-	-	-	-	-	-	59	80	72	35	20	41.45	0.93	1.11	0.81	0.56	0.49	0.45	70.3333	32.15	0.95	0.5	0.925999	0.925999	0.0245203	0.800877	no
comp16841_c2	comp16841_c2_seq1,comp16841_c2_seq10,comp16841_c2_seq11,comp16841_c2_seq12,comp16841_c2_seq13,comp16841_c2_seq14,comp16841_c2_seq15,comp16841_c2_seq16,comp16841_c2_seq17,comp16841_c2_seq18,comp16841_c2_seq2,comp16841_c2_seq3,comp16841_c2_seq4,comp16841_c2	3948	1534.67	-	-	-	[R] General function prediction only	-	-	3240.89	3308.22	4777.77	2743.09	1725.91	4169.65	66.86	59.97	62.94	46.4	56.08	51.81	3775.63	2879.55	63.2567	51.43	0.298607	0.298607	0.0308831	0.800877	no
comp22061_c0	comp22061_c0_seq1	821	821	Q6K8Z4	-	GO:0003779(actin binding);GO:0004721(phosphoprotein phosphatase activity);GO:0030036(actin cytoskeleton organization)	-	-	-	311.98	324.99	778.46	829.48	368.08	1110.21	10.98	10.01	19.47	29.72	20.22	26.92	471.81	769.257	13.4867	25.62	-0.925737	0.925737	0.0423835	0.800877	no
comp36852_c0	comp36852_c0_seq1	1519	1519	Q8LE59	-	GO:0009535(chloroplast thylakoid membrane);GO:0016021(integral to membrane);GO:0005886(plasma membrane);GO:0005774(vacuolar membrane);GO:0005381(iron ion transmembrane transporter activity);GO:0005385(zinc ion transmembrane transporter activity);GO:005507	[P] Inorganic ion transport and metabolism	-	-	233.02	232	321.8	161	92	263	4.24	3.69	4.16	2.98	2.61	3.3	262.273	172	4.03	2.96333	0.443559	0.443559	0.0160989	0.800877	no
comp11569_c0	comp11569_c0_seq1	253	253	-	-	-	-	-	-	4	4	7	3	1	3	0.59	0.51	0.73	0.45	0.23	0.3	5	2.33333	0.61	0.326667	0.90099	0.90099	0.0361659	0.800877	no
comp32410_c0	comp32410_c0_seq1	5045	5045	-	-	-	[Y] Nuclear structure ;[U] Intracellular trafficking, secretion, and vesicular transport	-	-	1187.11	1447.15	1735.84	1524.55	913.17	2243.56	6.28	6.7	6.53	8.21	7.54	8.17	1456.7	1560.43	6.50333	7.97333	-0.294004	0.294004	0.00844608	0.800877	no
comp31785_c0	comp31785_c0_seq1	795	795	Q56YJ8	-	GO:0005634(nucleus);GO:0003677(DNA binding);GO:0010052(guard cell differentiation);GO:0051782(negative regulation of cell division);GO:0045597(positive regulation of cell differentiation);GO:0045893(positive regulation of transcription, DNA-dependent);GO:	-	-	-	276	264.18	365.67	152	118.03	280.5	10.06	8.43	9.48	5.64	6.72	7.05	301.95	183.51	9.32333	6.47	0.52708	0.52708	0.0114658	0.800877	no
comp106367_c0	comp106367_c0_seq1	598	598	-	-	-	-	-	-	50	51	55	21	21	40	2.51	2.24	1.96	1.07	1.64	1.38	52	27.3333	2.23667	1.36333	0.714212	0.714212	0.0188774	0.800877	no
comp18229_c0	comp18229_c0_seq1	1975	1975	Q39193	-	GO:0005829(cytosol);GO:0005634(nucleus);GO:0005524(ATP binding);GO:0005515(protein binding);GO:0004674(protein serine/threonine kinase activity);GO:0009738(abscisic acid mediated signaling pathway);GO:0009789(positive regulation of abscisic acid mediated	[T] Signal transduction mechanisms	K00924	-	9178.23	8115.81	10087.4	4543.67	3983.13	7569.19	126.93	98.21	99.16	63.97	85.98	72.11	9127.14	5365.33	108.1	74.02	0.546379	0.546379	0.0473272	0.800877	no
comp1341_c0	comp1341_c0_seq1	705	705	-	-	-	-	-	-	51	50	48	15	16	38	2.12	1.82	1.42	0.64	1.04	1.09	49.6667	23	1.78667	0.923333	0.952347	0.952347	0.0300894	0.800877	no
comp15771_c0	comp15771_c0_seq1,comp15771_c0_seq2	1900	1735.17	Q9ZUX7	tRNA dimethylallyltransferase	GO:0005829(cytosol);GO:0009824(AMP dimethylallyltransferase activity);GO:0005524(ATP binding);GO:0052381(tRNA dimethylallyltransferase activity);GO:0008270(zinc ion binding);GO:0009691(cytokinin biosynthetic process);GO:0008033(tRNA processing)	[J] Translation, ribosomal structure and biogenesis	K00791	ko00908(Zeatin biosynthesis)	1035.72	987.48	1238.7	587.05	477.1	1032.92	15.75	12.68	13.02	9.06	11.16	10.64	1087.3	699.023	13.8167	10.2867	0.425634	0.425634	0.0466143	0.800877	no
comp11029_c0	comp11029_c0_seq1,comp11029_c0_seq2,comp11029_c0_seq3,comp11029_c0_seq4	2906	2860.75	-	-	-	-	-	-	4839.97	6143.81	6307.05	2592.71	2221.89	5288.1	45.71	50.82	42.28	24.92	32.81	34.38	5763.61	3367.57	46.27	30.7033	0.591682	0.591682	0.0162259	0.800877	no
comp14071_c0	comp14071_c0_seq1,comp14071_c0_seq2,comp14071_c0_seq3	2338	1971.66	Q5ZME8	glucose repression regulatory protein TUP1	GO:0005737(cytoplasm);GO:0005634(nucleus)	[R] General function prediction only	K06666	ko04111(Cell cycle - yeast)	1270.1	1284.91	1810.2	1021.1	706.07	1669.08	18.81	18.33	17.53	14.8	16.42	16.01	1455.07	1132.08	18.2233	15.7433	0.211046	0.211046	0.0176678	0.800877	no
comp11099_c1	comp11099_c1_seq1	202	202	-	-	-	-	-	-	2	3	4	4	2	6	0.41	0.54	0.58	0.84	0.64	0.85	3	4	0.51	0.776667	-0.606798	0.606798	0.0394048	0.800877	no
comp34441_c0	comp34441_c0_seq1	1018	1018	O82277	-	GO:0005634(nucleus);GO:0003677(DNA binding);GO:0048366(leaf development);GO:0006355(regulation of transcription, DNA-dependent);GO:0006351(transcription, DNA-dependent)	-	-	-	618.03	522.2	849.3	287.5	272	556.19	17.21	12.73	16.81	8.15	11.82	10.67	663.177	371.897	15.5833	10.2133	0.60955	0.60955	0.0441011	0.800877	no
comp144072_c0	comp144072_c0_seq1	640	640	-	-	-	-	-	-	30	38	40	23	12	24	1.39	1.54	1.32	1.09	0.87	0.77	36	19.6667	1.41667	0.91	0.638562	0.638562	0.0150744	0.800877	no
comp5723_c0	comp5723_c0_seq1	1253	1253	-	-	-	-	-	-	91.16	107.12	138	52	40	78	2.03	2.09	2.19	1.18	1.39	1.2	112.093	56.6667	2.10333	1.25667	0.743075	0.743075	0.000854765	0.800877	no
comp11169_c1	comp11169_c1_seq1,comp11169_c1_seq2	2413	2313.3	Q5Z8P0	pyruvate dehydrogenase phosphatase	GO:0016021(integral to membrane);GO:0008287(protein serine/threonine phosphatase complex);GO:0046872(metal ion binding);GO:0004722(protein serine/threonine phosphatase activity);GO:0006470(protein dephosphorylation)	[T] Signal transduction mechanisms	K01102	-	4856.24	4542.86	5116.74	2241.65	1673.02	4227.67	56.98	46.5	42.71	26.79	30.54	34.02	4838.61	2714.11	48.73	30.45	0.678368	0.678368	0.0327955	0.800877	no
comp16857_c0	comp16857_c0_seq1,comp16857_c0_seq2,comp16857_c0_seq3,comp16857_c0_seq4,comp16857_c0_seq5,comp16857_c0_seq6,comp16857_c0_seq7,comp16857_c0_seq8	1687	1489.1	F4HW02	-	-	[E] Amino acid transport and metabolism	-	-	2919.66	3707.01	3430.22	1360.44	1450.02	2518.47	52.78	57.9	43.33	24.95	41.12	31.06	3352.3	1776.31	51.3367	32.3767	0.665035	0.665035	0.0411762	0.800877	no
comp14371_c0	comp14371_c0_seq1,comp14371_c0_seq2,comp14371_c0_seq3	399	327.12	-	-	-	-	-	-	12.85	14	17	15	9	20	1.26	1.21	1.27	1.62	1.45	1.46	14.6167	14.6667	1.24667	1.51	-0.276473	0.276473	0.0306927	0.800877	no
comp14545_c0	comp14545_c0_seq1,comp14545_c0_seq10,comp14545_c0_seq2,comp14545_c0_seq3,comp14545_c0_seq4,comp14545_c0_seq5,comp14545_c0_seq6,comp14545_c0_seq7,comp14545_c0_seq8,comp14545_c0_seq9	2650	2445.21	-	-	-	-	-	-	1711.42	1474.42	1695.4	722.05	700.26	1291.43	19.22	15.18	13.88	8.19	12.17	9.92	1627.08	904.58	16.0933	10.0933	0.67306	0.67306	0.043923	0.800877	no
comp160555_c0	comp160555_c0_seq1	956	956	-	-	-	-	-	-	33	34	55	20	17	28	0.98	0.89	1.17	0.61	0.79	0.57	40.6667	21.6667	1.01333	0.656667	0.625876	0.625876	0.0304722	0.800877	no
comp29372_c0	comp29372_c0_seq1,comp29372_c0_seq2	2447	2136.83	-	-	-	[K] Transcription ;[R] General function prediction only	-	-	611.36	656.84	749.96	483.69	333.07	754.95	7.45	7.28	6.87	6	6.62	6.32	672.72	523.903	7.2	6.31333	0.189595	0.189595	0.0234309	0.800877	no
comp536676_c0	comp536676_c0_seq1	405	405	-	-	-	-	-	-	5	7	9	9	6	11	0.4	0.49	0.51	0.73	0.74	0.6	7	8.66667	0.466667	0.69	-0.564204	0.564204	0.019262	0.800877	no
comp14715_c0	comp14715_c0_seq1,comp14715_c0_seq2,comp14715_c0_seq3,comp14715_c0_seq4,comp14715_c0_seq5,comp14715_c0_seq6	1795	989.93	-	-	-	-	-	-	137	130	115.06	151	91.39	195.78	3.65	3.18	2.85	4.28	3.83	4.08	127.353	146.057	3.22667	4.06333	-0.332619	0.332619	0.0483065	0.800877	no
comp257423_c0	comp257423_c0_seq1	327	327	-	-	-	-	-	-	5	3.97	9	8	6	14	0.52	0.36	0.66	0.85	0.97	1	5.99	9.33333	0.513333	0.94	-0.872765	0.872765	0.021847	0.800877	no
comp15053_c0	comp15053_c0_seq1,comp15053_c0_seq2	590	522.92	-	-	-	-	-	-	21	18.96	25	10	6	19.71	1.18	0.96	1.11	0.59	0.55	0.77	21.6533	11.9033	1.08333	0.636667	0.766867	0.766867	0.00891407	0.800877	no
comp13972_c1	comp13972_c1_seq1,comp13972_c1_seq2	2554	2461.46	-	-	-	-	-	-	1172.25	1090.94	1437.74	278.96	453.86	927.04	12.96	10.58	11.33	3.14	7.84	7.05	1233.64	553.287	11.6233	6.01	0.951587	0.951587	0.0425875	0.800877	no
comp6563_c0	comp6563_c0_seq1	521	521	-	-	-	-	-	-	20	21	31	16	8	14	1.18	1.08	1.3	0.96	0.73	0.57	24	12.6667	1.18667	0.753333	0.655554	0.655554	0.0413964	0.800877	no
comp175994_c0	comp175994_c0_seq1	668	668	-	-	-	-	-	-	12	14	20	9	6.01	16	0.53	0.54	0.63	0.41	0.42	0.49	15.3333	10.3367	0.566667	0.44	0.364997	0.364997	0.0379753	0.800877	no
comp1464_c0	comp1464_c0_seq1,comp1464_c0_seq2	375	320.81	-	-	-	-	-	-	10.97	12	12	8	4	8	1.39	1.37	1.24	0.71	1.09	0.84	11.6567	6.66667	1.33333	0.88	0.599462	0.599462	0.0399648	0.800877	no
comp15920_c0	comp15920_c0_seq1,comp15920_c0_seq2,comp15920_c0_seq3,comp15920_c0_seq4,comp15920_c0_seq5	728	609.8	-	-	-	-	-	-	112.99	102.39	150.22	77.51	41	106	5.77	5.07	5.51	3.88	2.57	3.5	121.867	74.8367	5.45	3.31667	0.716522	0.716522	0.0163759	0.800877	no
comp106327_c0	comp106327_c0_seq1	687	687	-	-	-	-	-	-	25	23	25	31	23	65.99	1.07	0.86	0.76	1.35	1.54	1.95	24.3333	39.9967	0.896667	1.61333	-0.847401	0.847401	0.0369435	0.800877	no
comp38650_c0	comp38650_c0_seq1	1616	1616	O04567	-	GO:0016021(integral to membrane);GO:0005634(nucleus);GO:0005886(plasma membrane);GO:0005524(ATP binding);GO:0004672(protein kinase activity)	[R] General function prediction only	K00924	-	114	97	259.91	266.02	136	358.98	1.94	1.45	3.15	4.62	3.62	4.22	156.97	253.667	2.18	4.15333	-0.929942	0.929942	0.0390513	0.800877	no
comp5682_c0	comp5682_c0_seq1,comp5682_c0_seq2	3626	3466.4	Q9SA60	-	GO:0005739(mitochondrion);GO:0005488(binding)	-	-	-	312.14	292.69	373.47	220	128	311.87	2.37	1.99	2.07	1.73	1.58	1.67	326.1	219.957	2.14333	1.66	0.368673	0.368673	0.039465	0.800877	no
comp20769_c0	comp20769_c0_seq1	1687	1687	-	-	-	[R] General function prediction only	-	-	1826.11	1833.73	1955.75	676.52	705.13	1445.26	29.76	26.15	22.66	11.22	17.94	16.23	1871.86	942.303	26.19	15.13	0.791604	0.791604	0.0183641	0.800877	no
comp10161_c0	comp10161_c0_seq1	814	814	-	-	-	-	-	-	164	164	212.08	132	76	182.02	5.83	5.1	5.36	4.77	4.21	4.45	180.027	130.007	5.43	4.47667	0.278527	0.278527	0.0266124	0.800877	no
comp40211_c0	comp40211_c0_seq1	880	880	-	-	-	-	-	-	105	118	142	62	46	95.72	3.42	3.37	3.29	2.06	2.34	2.15	121.667	67.9067	3.36	2.18333	0.621929	0.621929	0.00137614	0.800877	no
comp13233_c3	comp13233_c3_seq1,comp13233_c3_seq2	3743	2390.09	Q9LMI0	trehalose-phosphatase	GO:0005829(cytosol);GO:0003825(alpha,alpha-trehalose-phosphate synthase (UDP-forming) activity);GO:0005992(trehalose biosynthetic process)	[G] Carbohydrate transport and metabolism	K01087	ko00500(Starch and sucrose metabolism)	9533.24	15585.9	14988.6	5170.87	6205.81	11491.3	109.49	128.65	103.46	49.42	89.81	70.78	13369.2	7622.66	113.867	70.0033	0.70185	0.70185	0.0425114	0.800877	no
comp59057_c0	comp59057_c0_seq1	1130	1130	-	-	-	-	-	-	195	190	283.03	123	71	154.02	4.85	4.14	5.01	3.12	2.76	2.64	222.677	116.007	4.66667	2.84	0.716501	0.716501	0.00859948	0.800877	no
comp10108_c0	comp10108_c0_seq1,comp10108_c0_seq2	891	762.66	-	-	-	-	-	-	87.97	68	105	37.37	29	76	3.39	2.72	3.37	1.6	1.94	2.19	86.99	47.4567	3.16	1.91	0.726352	0.726352	0.0125267	0.800877	no
comp799_c0	comp799_c0_seq1	1293	1293	-	-	-	-	-	-	27	23	41	12	10	23	0.58	0.43	0.63	0.26	0.34	0.34	30.3333	15	0.546667	0.313333	0.802963	0.802963	0.0435584	0.800877	no
comp18163_c0	comp18163_c0_seq1	2844	2844	O65351	subtilisin	GO:0048046(apoplast);GO:0009505(plant-type cell wall);GO:0042802(identical protein binding);GO:0004252(serine-type endopeptidase activity);GO:0080001(mucilage extrusion from seed coat);GO:0048359(mucilage metabolic process involved seed coat development);	-	K01342	-	1238.39	1395.61	3234.13	2975.57	1507.02	4865.88	11.75	11.59	21.82	28.75	22.33	31.82	1956.04	3116.16	15.0533	27.6333	-0.876327	0.876327	0.0475768	0.800877	no
comp19078_c0	comp19078_c0_seq1	1715	1715	Q9Y7K5	-	GO:0005829(cytosol)	-	-	-	3793.27	3721.33	4722.61	2544.96	1763.71	4168.69	60.77	52.17	53.78	41.51	44.11	46.01	4079.07	2825.79	55.5733	43.8767	0.340939	0.340939	0.0299352	0.800877	no
comp5055_c0	comp5055_c0_seq1	1586	1586	Q6TUG0	DnaJ homolog, subfamily B, member 11	GO:0005788(endoplasmic reticulum lumen);GO:0031072(heat shock protein binding);GO:0006457(protein folding)	[O] Posttranslational modification, protein turnover, chaperones	K09517	-	1035.31	1584.9	1839.4	1785.82	957.92	2579.12	18	24.11	22.73	31.61	26	30.89	1486.54	1774.29	21.6133	29.5	-0.448793	0.448793	0.036809	0.800877	no
comp15535_c0	comp15535_c0_seq1,comp15535_c0_seq10,comp15535_c0_seq11,comp15535_c0_seq12,comp15535_c0_seq13,comp15535_c0_seq14,comp15535_c0_seq15,comp15535_c0_seq16,comp15535_c0_seq17,comp15535_c0_seq2,comp15535_c0_seq3,comp15535_c0_seq4,comp15535_c0_seq5,comp15535_c0_	2676	2287.3	Q2MHE4	sterile alpha motif and leucine zipper containing kinase AZK	GO:0005524(ATP binding);GO:0004674(protein serine/threonine kinase activity);GO:0010119(regulation of stomatal movement)	[T] Signal transduction mechanisms	K04424	ko04010(MAPK signaling pathway);ko04530(Tight junction)	1647.17	1510.04	2008.14	863.08	556.79	1681.48	19.29	15.24	16.6	10.61	9.92	14.02	1721.78	1033.78	17.0433	11.5167	0.565484	0.565484	0.0337541	0.800877	no
comp14664_c0	comp14664_c0_seq1,comp14664_c0_seq2,comp14664_c0_seq3	430	336.51	-	-	-	-	-	-	13	27	28	15	5	20	1.68	2.45	1.87	1.25	0.88	1.17	22.6667	13.3333	2	1.1	0.862496	0.862496	0.0419132	0.800877	no
comp16448_c4	comp16448_c4_seq1,comp16448_c4_seq10,comp16448_c4_seq11,comp16448_c4_seq12,comp16448_c4_seq13,comp16448_c4_seq14,comp16448_c4_seq15,comp16448_c4_seq2,comp16448_c4_seq3,comp16448_c4_seq4,comp16448_c4_seq5,comp16448_c4_seq6,comp16448_c4_seq7,comp16448_c4_se	1143	700.94	-	-	-	-	-	-	149	154.99	228	133.38	60.03	191.3	5.91	5.23	5.87	4.48	4	4.38	177.33	128.237	5.67	4.28667	0.403492	0.403492	0.0093126	0.800877	no
comp210078_c0	comp210078_c0_seq1	417	417	-	-	-	-	-	-	12	13.93	15	7	5	10	0.92	0.93	0.82	0.55	0.6	0.53	13.6433	7.33333	0.89	0.56	0.668379	0.668379	0.00293056	0.800877	no
comp11967_c2	comp11967_c2_seq1	709	709	P27154	phosphoenolpyruvate carboxylase	GO:0005737(cytoplasm);GO:0008964(phosphoenolpyruvate carboxylase activity);GO:0015977(carbon fixation);GO:0015979(photosynthesis);GO:0006099(tricarboxylic acid cycle)	-	K01595	ko00620(Pyruvate metabolism);ko00710(Carbon fixation in photosynthetic organisms);ko00720(Reductive carboxylate cycle (CO2 fixation))	249.96	381.27	456.92	487.74	252.07	722.99	10.35	13.81	13.45	20.56	16.29	20.62	362.717	487.6	12.5367	19.1567	-0.611693	0.611693	0.0240524	0.800877	no
comp15544_c0	comp15544_c0_seq1,comp15544_c0_seq2,comp15544_c0_seq3,comp15544_c0_seq4,comp15544_c0_seq5,comp15544_c0_seq6,comp15544_c0_seq7,comp15544_c0_seq8	1661	1028.39	Q5E9J7	-	GO:0016787(hydrolase activity);GO:0008270(zinc ion binding);GO:0008033(tRNA processing)	[F] Nucleotide transport and metabolism	K01500	ko00791(Atrazine degradation)	518.93	469.01	611.28	272.08	181	355	15.42	13.53	12.46	7.79	9.04	7.14	533.073	269.36	13.8033	7.99	0.788749	0.788749	0.00767241	0.800877	no
comp511057_c0	comp511057_c0_seq1	371	371	-	-	-	-	-	-	7	9	12	5	3	9.88	0.62	0.7	0.76	0.45	0.41	0.6	9.33333	5.96	0.693333	0.486667	0.510615	0.510615	0.0491915	0.800877	no
comp14996_c0	comp14996_c0_seq1,comp14996_c0_seq10,comp14996_c0_seq11,comp14996_c0_seq12,comp14996_c0_seq2,comp14996_c0_seq3,comp14996_c0_seq4,comp14996_c0_seq5,comp14996_c0_seq6,comp14996_c0_seq7,comp14996_c0_seq8,comp14996_c0_seq9	1333	1172.13	-	-	-	-	-	-	3474.66	2759.02	3875.01	1055.94	1302.04	2391.31	82.16	57.22	65.29	25.75	48.54	39.26	3369.56	1583.1	68.2233	37.85	0.849972	0.849972	0.0377642	0.800877	no
comp19552_c0	comp19552_c0_seq1	3305	3305	F4JMJ1	hypoxia up-regulated 1	-	[O] Posttranslational modification, protein turnover, chaperones	K09486	-	4052.71	4826.48	5184.58	4946.69	3591.75	7765	32.98	34.36	29.99	40.97	45.62	43.53	4687.92	5434.48	32.4433	43.3733	-0.418886	0.418886	0.004239	0.800877	no
comp6515_c0	comp6515_c0_seq1	552	552	-	-	-	-	-	-	10	10	15	14	8	20	0.55	0.48	0.59	0.78	0.69	0.76	11.6667	14	0.54	0.743333	-0.46105	0.46105	0.0090798	0.800877	no
comp11991_c0	comp11991_c0_seq1,comp11991_c0_seq2,comp11991_c0_seq3,comp11991_c0_seq4	3148	1829.07	-	-	-	-	-	-	142	223	290	142.29	91	232.16	2.12	2.22	2.53	1.72	1.9	1.82	218.333	155.15	2.29	1.81333	0.336703	0.336703	0.0450385	0.800877	no
comp3698_c0	comp3698_c0_seq1,comp3698_c0_seq2	2766	2146.15	-	-	-	-	-	-	426.29	458.01	448.15	238	181.98	340.96	5.34	5.08	4.1	3.02	3.84	2.87	444.15	253.647	4.84	3.24333	0.57753	0.57753	0.0319961	0.800877	no
comp506610_c0	comp506610_c0_seq1	218	218	-	-	-	-	-	-	3	4	6	2	1	3	0.55	0.64	0.78	0.37	0.28	0.38	4.33333	2	0.656667	0.343333	0.935551	0.935551	0.0265861	0.800877	no
comp159912_c0	comp159912_c0_seq1	479	479	-	-	-	-	-	-	24	23	23	15	6	13	1.56	1.31	1.06	0.99	0.61	0.58	23.3333	11.3333	1.31	0.726667	0.850201	0.850201	0.0410356	0.800877	no
comp120870_c0	comp120870_c0_seq1	961	961	-	-	-	-	-	-	38.43	36	43	18	15	25	1.14	0.93	0.91	0.54	0.69	0.51	39.1433	19.3333	0.993333	0.58	0.776225	0.776225	0.012912	0.800877	no
comp12293_c1	comp12293_c1_seq1,comp12293_c1_seq2	958	747.49	-	-	-	-	-	-	731.11	882.36	878.71	301	366.97	525.13	28.44	30.53	24.61	12.12	22.2	14.01	830.727	397.7	27.86	16.11	0.790239	0.790239	0.0422807	0.800877	no
comp16404_c0	comp16404_c0_seq1,comp16404_c0_seq2,comp16404_c0_seq3,comp16404_c0_seq4	1423	1112.31	-	-	-	-	-	-	123.06	128	155.96	76	46.72	88.5	2.86	2.96	3.03	2.3	1.68	1.75	135.673	70.4067	2.95	1.91	0.627142	0.627142	0.0277377	0.800877	no
comp82626_c0	comp82626_c0_seq1	587	587	-	-	-	-	-	-	34	50	61	24	18	42	1.74	2.24	2.22	1.25	1.44	1.48	48.3333	28	2.06667	1.39	0.572221	0.572221	0.0377732	0.800877	no
comp512392_c0	comp512392_c0_seq1	329	329	-	-	-	-	-	-	2	4	5	6	4	8	0.21	0.36	0.37	0.63	0.64	0.57	3.66667	6	0.313333	0.613333	-0.968973	0.968973	0.0168319	0.800877	no
comp150631_c0	comp150631_c0_seq1	1075	1075	-	-	-	-	-	-	25.2	31	32	16	11	16.66	0.66	0.71	0.6	0.43	0.45	0.3	29.4	14.5533	0.656667	0.393333	0.739409	0.739409	0.0132186	0.800877	no
comp12066_c0	comp12066_c0_seq1,comp12066_c0_seq2,comp12066_c0_seq3	721	531.8	-	-	-	-	-	-	17	18.04	29	13	7	22	1.03	0.99	0.98	0.77	0.68	0.71	21.3467	14	1	0.72	0.473931	0.473931	0.00211021	0.800877	no
comp13775_c0	comp13775_c0_seq1,comp13775_c0_seq2	803	782.9	-	-	-	-	-	-	228	226.71	258.99	159	77	220.04	8.46	7.34	6.8	6	4.46	5.61	237.9	152.013	7.53333	5.35667	0.491953	0.491953	0.0319601	0.800877	no
comp16503_c1	comp16503_c1_seq1,comp16503_c1_seq10,comp16503_c1_seq11,comp16503_c1_seq12,comp16503_c1_seq13,comp16503_c1_seq14,comp16503_c1_seq15,comp16503_c1_seq16,comp16503_c1_seq17,comp16503_c1_seq18,comp16503_c1_seq19,comp16503_c1_seq2,comp16503_c1_seq20,comp16503_	4853	2063.83	Q9FH87	-	GO:0005488(binding)	[R] General function prediction only	-	-	1615.18	1527.78	2255.49	1175.22	751.95	1842.95	21.69	17.69	21.04	13.53	15.19	15.28	1799.48	1256.71	20.14	14.6667	0.457523	0.457523	0.0313935	0.800877	no
comp350994_c0	comp350994_c0_seq1	797	797	-	-	-	-	-	-	22	26	33	16	11	25	0.8	0.83	0.85	0.59	0.62	0.63	27	17.3333	0.826667	0.613333	0.430634	0.430634	0.000419602	0.800877	no
comp5781_c0	comp5781_c0_seq1	394	394	-	-	-	-	-	-	35	40	50.21	16.75	11	35.03	2.88	2.88	2.93	1.4	1.41	1.98	41.7367	20.9267	2.89667	1.59667	0.859331	0.859331	0.0204024	0.800877	no
comp9922_c0	comp9922_c0_seq1,comp9922_c0_seq2	3109	2571.99	Q9XIL5	-	GO:0005488(binding);GO:0004519(endonuclease activity);GO:0000373(Group II intron splicing);GO:0045292(nuclear mRNA cis splicing, via spliceosome);GO:0048564(photosystem I assembly)	[R] General function prediction only	-	-	1457.17	1531.78	1989.39	1159.25	867	1818.79	13.41	13.87	13.46	10.87	12.27	11.88	1659.45	1281.68	13.58	11.6733	0.218267	0.218267	0.0333785	0.800877	no
comp233461_c0	comp233461_c0_seq1	410	410	Q42602	-	GO:0016021(integral to membrane);GO:0009055(electron carrier activity);GO:0020037(heme binding);GO:0004497(monooxygenase activity);GO:0016705(oxidoreductase activity, acting on paired donors, with incorporation or reduction of molecular oxygen)	[Q] Secondary metabolites biosynthesis, transport and catabolism	K00517	ko00361(gamma-Hexachlorocyclohexane degradation);ko00626(Naphthalene and anthracene degradation);ko00903(Limonene and pinene degradation);ko00945(Stilbenoid, diarylheptanoid and gingerol biosynthesis)	7	12	21.8	17	15	33.13	0.55	0.82	1.21	1.35	1.83	1.79	13.6	21.71	0.86	1.65667	-0.945875	0.945875	0.0337417	0.800877	no
comp2705_c0	comp2705_c0_seq1,comp2705_c0_seq2	1458	1369.45	Q8G2L5	ApaG protein	-	-	K06195	-	307.54	335.25	531.19	485.61	300	590	5.89	5.61	7.17	9.39	9.01	7.77	391.327	458.537	6.22333	8.72333	-0.487192	0.487192	0.0218359	0.800877	no
comp45886_c0	comp45886_c0_seq1	299	299	-	-	-	-	-	-	49.91	62	60.91	29.95	18	56.99	5.83	6.34	5.06	3.56	3.28	4.59	57.6067	34.98	5.74333	3.81	0.592097	0.592097	0.0240404	0.800877	no
comp118469_c0	comp118469_c0_seq1	445	445	-	-	-	-	-	-	8	10	13	4	3	8	0.57	0.62	0.65	0.29	0.33	0.39	10.3333	5	0.613333	0.336667	0.86535	0.86535	0.00209846	0.800877	no
comp4672_c0	comp4672_c0_seq1	4549	4549	-	-	-	-	-	-	1908.85	2103.03	2537.44	1746.94	1074.83	2507.95	11.21	10.81	10.6	10.45	9.86	10.15	2183.11	1776.57	10.8733	10.1533	0.0988408	0.0988408	0.0436027	0.800877	no
comp12220_c0	comp12220_c0_seq1,comp12220_c0_seq2	531	496.32	-	-	-	-	-	-	6	7.99	9	12	6	15	0.36	0.48	0.37	0.74	0.54	0.62	7.66333	11	0.403333	0.633333	-0.650992	0.650992	0.0369473	0.800877	no
comp63612_c0	comp63612_c0_seq1	203	203	-	-	-	-	-	-	7	8	12.08	12	6	15.02	1.43	1.43	1.75	2.49	1.91	2.11	9.02667	11.0067	1.53667	2.17	-0.497891	0.497891	0.043693	0.800877	no
comp354420_c0	comp354420_c0_seq1	342	342	-	-	-	-	-	-	2	4	3	4	3	6	0.2	0.34	0.21	0.4	0.46	0.41	3	4.33333	0.25	0.423333	-0.759866	0.759866	0.0459861	0.800877	no
comp19528_c0	comp19528_c0_seq1	1358	1358	Q9M9S6	-	-	[G] Carbohydrate transport and metabolism	-	-	1811.55	1675.66	2724.26	2471.82	1396.91	3299.86	37.09	30.02	39.65	51.52	44.65	46.55	2070.49	2389.53	35.5867	47.5733	-0.418816	0.418816	0.0321888	0.800877	no
comp16698_c1	comp16698_c1_seq1,comp16698_c1_seq2,comp16698_c1_seq3,comp16698_c1_seq4,comp16698_c1_seq5,comp16698_c1_seq6,comp16698_c1_seq7	3582	2703.03	Q5JK68	Cdc2-related kinase, arginine/serine-rich	GO:0005524(ATP binding);GO:0004693(cyclin-dependent protein kinase activity);GO:0008353(RNA polymerase II carboxy-terminal domain kinase activity)	[D] Cell cycle control, cell division, chromosome partitioning	K08819	-	4680.06	4793.59	5495.81	3370.35	2367.01	5230.99	46.34	41.35	39.63	33.01	36.29	35.35	4989.82	3656.12	42.44	34.8833	0.282887	0.282887	0.0455801	0.800877	no
comp15896_c0	comp15896_c0_seq1,comp15896_c0_seq10,comp15896_c0_seq11,comp15896_c0_seq12,comp15896_c0_seq13,comp15896_c0_seq14,comp15896_c0_seq15,comp15896_c0_seq16,comp15896_c0_seq17,comp15896_c0_seq18,comp15896_c0_seq19,comp15896_c0_seq2,comp15896_c0_seq20,comp15896_	2668	1880.08	-	-	-	-	-	-	1771.15	1425.8	1933.47	1058.18	574	1100.2	25.63	19.02	19.6	15.21	12.92	11.06	1710.14	910.793	21.4167	13.0633	0.713211	0.713211	0.0379841	0.800877	no
comp15332_c0	comp15332_c0_seq1,comp15332_c0_seq2,comp15332_c0_seq3,comp15332_c0_seq4,comp15332_c0_seq5,comp15332_c0_seq6,comp15332_c0_seq7	935	668.39	-	-	-	-	-	-	77.17	68	99.03	48	20	60	3.17	2.32	3.11	1.7	1.45	1.35	81.4	42.6667	2.86667	1.5	0.934412	0.934412	0.0260731	0.800877	no
comp129624_c0	comp129624_c0_seq1	555	555	-	-	-	-	-	-	27	25	39	17.01	12	24	1.48	1.2	1.52	0.95	1.02	0.9	30.3333	17.67	1.4	0.956667	0.549339	0.549339	0.0364502	0.800877	no
comp17102_c0	comp17102_c0_seq1	484	484	P0CG85	ubiquitin C	GO:0005737(cytoplasm);GO:0005634(nucleus)	[O] Posttranslational modification, protein turnover, chaperones ;[R] General function prediction only	K08770	ko03320(PPAR signaling pathway)	17316.6	15859.5	21412.9	10600.4	7981.62	16635.3	1110.4	889.85	976	691.95	798.88	734.86	18196.3	11739.1	992.083	741.897	0.419243	0.419243	0.0416286	0.800877	no
comp91381_c0	comp91381_c0_seq1	353	353	-	-	-	-	-	-	22	24.17	39	8	7	24	2.07	1.99	2.61	0.77	1.03	1.56	28.39	13	2.22333	1.12	0.989226	0.989226	0.0231661	0.800877	no
comp13745_c0	comp13745_c0_seq1,comp13745_c0_seq2,comp13745_c0_seq3,comp13745_c0_seq4,comp13745_c0_seq5,comp13745_c0_seq6	2826	2604.24	Q9CAA7	-	GO:0000151(ubiquitin ligase complex);GO:0005488(binding);GO:0004842(ubiquitin-protein ligase activity)	[S] Function unknown	-	-	271.99	247	288	154	114.98	189	2.88	2.27	2.14	1.62	1.86	1.35	268.997	152.66	2.43	1.61	0.593896	0.593896	0.0479357	0.800877	no
comp14358_c0	comp14358_c0_seq1,comp14358_c0_seq2	1230	1212.78	-	-	-	-	-	-	72.01	99	101.69	55	32	93.73	1.66	2	1.67	1.29	1.15	1.48	90.9	60.2433	1.77667	1.30667	0.443282	0.443282	0.0341321	0.800877	no
comp459358_c0	comp459358_c0_seq1	452	452	-	-	-	[R] General function prediction only	-	-	9	9.99	9	11	8	16	0.63	0.61	0.44	0.78	0.87	0.77	9.33	11.6667	0.56	0.806667	-0.526546	0.526546	0.0356121	0.800877	no
comp127397_c0	comp127397_c0_seq1	1339	1339	-	-	-	-	-	-	104.92	94	106	45	30	76	2.18	1.71	1.57	0.95	0.97	1.09	101.64	50.3333	1.82	1.00333	0.859137	0.859137	0.0411664	0.800877	no
comp7073_c0	comp7073_c0_seq1	538	538	-	-	-	-	-	-	51.97	42	60.93	32	13	32	2.94	2.08	2.45	1.85	1.15	1.25	51.6333	25.6667	2.49	1.41667	0.813645	0.813645	0.0324782	0.800877	no
comp329452_c0	comp329452_c0_seq1	1641	1641	-	-	-	-	-	-	37	55.77	77	19	20	33	0.62	0.82	0.92	0.32	0.52	0.38	56.59	24	0.786667	0.406667	0.951906	0.951906	0.02904	0.800877	no
comp12244_c0	comp12244_c0_seq1,comp12244_c0_seq2	927	898.76	-	-	-	-	-	-	30	27	30	15	9	14	0.96	0.76	0.67	0.49	0.44	0.31	29	12.6667	0.796667	0.413333	0.94667	0.94667	0.0263831	0.800877	no
comp1280_c0	comp1280_c0_seq1	572	572	-	-	-	-	-	-	9	9	15	7	3.34	5	0.48	0.42	0.56	0.38	0.28	0.18	11	5.11333	0.486667	0.28	0.797507	0.797507	0.0489895	0.800877	no
comp12275_c0	comp12275_c0_seq1,comp12275_c0_seq2,comp12275_c0_seq3	565	468.18	-	-	-	-	-	-	27	28.01	50	17	11	21	1.7	1.71	2.39	0.95	1.08	0.95	35.0033	16.3333	1.93333	0.993333	0.960741	0.960741	0.0498359	0.800877	no
comp1461_c0	comp1461_c0_seq1	779	779	-	-	-	-	-	-	20.01	21	30	15	7	12	0.75	0.69	0.8	0.57	0.41	0.31	23.67	11.3333	0.746667	0.43	0.796128	0.796128	0.0374674	0.800877	no
comp15005_c0	comp15005_c0_seq1,comp15005_c0_seq2,comp15005_c0_seq3,comp15005_c0_seq4,comp15005_c0_seq5,comp15005_c0_seq6	3075	2396.08	P25439	ATP-dependent helicase STH1/SNF2	GO:0035060(brahma complex);GO:0005524(ATP binding);GO:0003677(DNA binding);GO:0004386(helicase activity);GO:0005515(protein binding);GO:0007409(axonogenesis);GO:0016568(chromatin modification);GO:0070983(dendrite guidance);GO:0035172(hemocyte proliferatio	[K] Transcription	K11786	-	652	738.99	780.06	320.58	282.96	692	6.72	6.77	5.98	3.41	4.39	5.21	723.683	431.847	6.49	4.33667	0.581632	0.581632	0.0356951	0.800877	no
comp557856_c0	comp557856_c0_seq1	348	348	-	-	-	-	-	-	9	8	12	4	3	6	0.86	0.67	0.82	0.39	0.45	0.4	9.66667	4.33333	0.783333	0.413333	0.922321	0.922321	0.0162801	0.800877	no
comp11684_c0	comp11684_c0_seq1,comp11684_c0_seq2,comp11684_c0_seq3	3667	3266.04	-	-	-	-	-	-	1339.65	1311.3	1443.61	833.35	533	1012.85	11	9.47	8.31	6.94	6.87	5.85	1364.85	793.067	9.59333	6.55333	0.549803	0.549803	0.0427053	0.800877	no
comp193764_c0	comp193764_c0_seq1	885	885	-	-	-	-	-	-	22.88	31	37	11	8	28	0.74	0.88	0.85	0.36	0.4	0.63	30.2933	15.6667	0.823333	0.463333	0.829426	0.829426	0.0323491	0.800877	no
comp10330_c0	comp10330_c0_seq1	563	563	-	-	-	-	-	-	38	37	48	20	12	34	2.04	1.74	1.83	1.09	1.01	1.26	41	22	1.87	1.12	0.73954	0.73954	0.00325396	0.800877	no
comp12211_c0	comp12211_c0_seq1	1503	1503	-	-	-	-	-	-	31	26	34	17	8	19	0.57	0.42	0.44	0.32	0.23	0.24	30.3333	14.6667	0.476667	0.263333	0.856091	0.856091	0.0256009	0.800877	no
comp16259_c0	comp16259_c0_seq1,comp16259_c0_seq10,comp16259_c0_seq11,comp16259_c0_seq2,comp16259_c0_seq3,comp16259_c0_seq4,comp16259_c0_seq5,comp16259_c0_seq6,comp16259_c0_seq7,comp16259_c0_seq8,comp16259_c0_seq9	1785	1074.42	Q94JL3	-	GO:0005634(nucleus);GO:0003677(DNA binding);GO:0006355(regulation of transcription, DNA-dependent);GO:0006351(transcription, DNA-dependent)	-	-	-	307.62	335.48	557.79	506.15	237.71	669.5	7.07	5.99	7.58	10.73	9.42	8.35	400.297	471.12	6.88	9.5	-0.465519	0.465519	0.0411896	0.800877	no
comp17353_c0	comp17353_c0_seq1	1836	1836	Q39010	-	GO:0005524(ATP binding);GO:0004674(protein serine/threonine kinase activity);GO:0009742(brassinosteroid mediated signaling pathway);GO:0032880(regulation of protein localization)	[G] Carbohydrate transport and metabolism	K00924	-	8359.34	8168.71	9832.08	5279.81	3592.01	9388.8	124.73	106.65	104.28	80.19	83.66	96.51	8786.71	6086.87	111.887	86.7867	0.366493	0.366493	0.0401668	0.800877	no
comp9498_c1	comp9498_c1_seq1	460	460	P93194	-	GO:0005576(extracellular region);GO:0016021(integral to membrane);GO:0005886(plasma membrane);GO:0005524(ATP binding);GO:0004674(protein serine/threonine kinase activity);GO:0019199(transmembrane receptor protein kinase activity)	-	-	-	29	19.02	54.92	43	42	87	1.98	1.13	2.66	2.98	4.47	4.08	34.3133	57.3333	1.92333	3.84333	-0.998749	0.998749	0.0378323	0.800877	no
comp87658_c0	comp87658_c0_seq1	375	375	-	-	-	-	-	-	13	13	19	22	13.95	27	1.14	0.99	1.18	1.96	1.9	1.62	15	20.9833	1.10333	1.82667	-0.727345	0.727345	0.00814564	0.800877	no
comp93768_c0	comp93768_c0_seq1	1019	1019	-	-	-	-	-	-	65	83	75.18	43	23	41.98	1.81	2.02	1.49	1.22	1	0.8	74.3933	35.9933	1.77333	1.00667	0.816878	0.816878	0.0192708	0.800877	no
comp11786_c0	comp11786_c0_seq1,comp11786_c0_seq2,comp11786_c0_seq3,comp11786_c0_seq4	1993	1866.89	Q9LUM4	EREBP-like factor	GO:0005634(nucleus);GO:0003677(DNA binding);GO:0003700(sequence-specific DNA binding transcription factor activity);GO:0009873(ethylene mediated signaling pathway);GO:0001666(response to hypoxia)	-	K09286	-	9526.45	10780.1	12433.5	4461.63	4355.36	7749.97	139.63	138.24	129.48	66.85	99.72	78.56	10913.4	5522.32	135.783	81.71	0.732722	0.732722	0.0214997	0.800877	no
comp7053_c0	comp7053_c0_seq1	331	331	-	-	-	-	-	-	11	10	9	14	8	22	1.13	0.9	0.65	1.46	1.28	1.55	10	14.6667	0.893333	1.43	-0.678745	0.678745	0.0400022	0.800877	no
comp54059_c0	comp54059_c0_seq1	348	348	-	-	-	-	-	-	31.98	32	56	13	15	32	3.07	2.69	3.82	1.27	2.25	2.12	39.9933	20	3.19333	1.88	0.76433	0.76433	0.0442935	0.800877	no
comp14485_c0	comp14485_c0_seq1	1232	1232	P93050	-	GO:0016021(integral to membrane);GO:0005886(plasma membrane);GO:0005524(ATP binding);GO:0004674(protein serine/threonine kinase activity);GO:0004872(receptor activity)	[T] Signal transduction mechanisms	K00924	-	197.09	211.41	451.26	431.09	234.96	545.03	4.47	4.2	7.28	9.96	8.33	8.52	286.587	403.693	5.31667	8.93667	-0.749215	0.749215	0.046834	0.800877	no
comp15002_c0	comp15002_c0_seq1,comp15002_c0_seq2,comp15002_c0_seq3,comp15002_c0_seq4,comp15002_c0_seq5	1218	919.29	Q94A78	isopenicillin-N synthase	GO:0046872(metal ion binding);GO:0016706(oxidoreductase activity, acting on paired donors, with incorporation or reduction of molecular oxygen, 2-oxoglutarate as one donor, and incorporation of one atom each of oxygen into both donors)	[Q] Secondary metabolites biosynthesis, transport and catabolism ;[R] General function prediction only	K04126	ko00311(Penicillin and cephalosporin biosynthesis)	336	307.92	365.74	179	133	266.98	10.37	8.84	8.3	6.69	6.31	6.25	336.553	192.993	9.17	6.41667	0.515098	0.515098	0.0415487	0.800877	no
comp16015_c0	comp16015_c0_seq1,comp16015_c0_seq10,comp16015_c0_seq2,comp16015_c0_seq3,comp16015_c0_seq4,comp16015_c0_seq5,comp16015_c0_seq6,comp16015_c0_seq7,comp16015_c0_seq8,comp16015_c0_seq9	1931	912.97	-	-	-	[R] General function prediction only	-	-	315.01	272.02	350.21	147.99	108	270.75	9.37	7.64	7.42	4.37	4.98	5.77	312.413	175.58	8.14333	5.04	0.692196	0.692196	0.0184658	0.800877	no
comp9251_c0	comp9251_c0_seq1,comp9251_c0_seq2,comp9251_c0_seq3	5192	5036.83	-	-	-	[Y] Nuclear structure ;[U] Intracellular trafficking, secretion, and vesicular transport	-	-	1668.41	2019.6	2345.48	1970.13	1252.97	2791.2	8.88	9.76	8.85	10.61	10.39	10.17	2011.16	2004.77	9.16333	10.39	-0.181251	0.181251	0.0387937	0.800877	no
comp28216_c0	comp28216_c0_seq1	1691	1691	Q94C25	-	GO:0016021(integral to membrane);GO:0005524(ATP binding);GO:0004674(protein serine/threonine kinase activity);GO:0004872(receptor activity)	[T] Signal transduction mechanisms	K00924	-	732.37	780.85	969.92	570.99	389.3	915.53	11.91	11.11	11.21	9.45	9.88	10.25	827.713	625.273	11.41	9.86	0.210639	0.210639	0.0107058	0.800877	no
comp15540_c1	comp15540_c1_seq1	1034	1034	Q03194	H+-transporting ATPase	GO:0016021(integral to membrane);GO:0005886(plasma membrane);GO:0005524(ATP binding);GO:0008553(hydrogen-exporting ATPase activity, phosphorylative mechanism);GO:0046872(metal ion binding);GO:0006754(ATP biosynthetic process)	[P] Inorganic ion transport and metabolism	K01535	ko00190(Oxidative phosphorylation)	204	236.82	248.81	141	89.15	186.44	5.59	5.67	4.84	3.93	3.81	3.52	229.877	138.863	5.36667	3.75333	0.515854	0.515854	0.0137103	0.800877	no
comp10970_c2	comp10970_c2_seq1	536	536	-	-	-	-	-	-	16	16	23	8	7	12	0.91	0.8	0.93	0.46	0.62	0.47	18.3333	9	0.88	0.516667	0.76827	0.76827	0.00615213	0.800877	no
comp160732_c0	comp160732_c0_seq1	255	255	-	-	-	-	-	-	6	5	6	3	1	4	0.87	0.64	0.62	0.44	0.23	0.4	5.66667	2.66667	0.71	0.356667	0.993243	0.993243	0.0283815	0.800877	no
comp20706_c0	comp20706_c0_seq1	1916	1916	Q9LRR7	9-cis-epoxycarotenoid dioxygenase	GO:0009570(chloroplast stroma);GO:0009535(chloroplast thylakoid membrane);GO:0045549(9-cis-epoxycarotenoid dioxygenase activity);GO:0046872(metal ion binding);GO:0009688(abscisic acid biosynthetic process);GO:0042538(hyperosmotic salinity response);GO:000	[Q] Secondary metabolites biosynthesis, transport and catabolism	K09840	ko00906(Carotenoid biosynthesis)	1581	1408.51	1793.03	748.99	664.92	1370.69	22.57	17.59	18.19	10.88	14.81	13.48	1594.18	928.2	19.45	13.0567	0.574984	0.574984	0.03452	0.800877	no
comp942204_c0	comp942204_c0_seq1	230	230	-	-	-	-	-	-	4	5	6	2	2	3	0.67	0.74	0.72	0.34	0.53	0.35	5	2.33333	0.71	0.406667	0.803972	0.803972	0.0288561	0.800877	no
comp347904_c0	comp347904_c0_seq1	540	540	-	-	-	-	-	-	18	21	25	12	4	15	1.02	1.04	1	0.69	0.35	0.58	21.3333	10.3333	1.02	0.54	0.917538	0.917538	0.0393305	0.800877	no
comp24911_c0	comp24911_c0_seq1	1747	1747	-	-	-	[J] Translation, ribosomal structure and biogenesis	-	-	749.98	920.87	1064.55	954.99	618.61	1262.94	11.79	12.66	11.89	15.28	15.17	13.67	911.8	945.513	12.1133	14.7067	-0.279874	0.279874	0.0210075	0.800877	no
comp6944_c0	comp6944_c0_seq1	2420	2420	Q9FJY9	-	GO:0005739(mitochondrion)	[R] General function prediction only	-	-	248.98	217	261.08	118	101	137	2.79	2.13	2.08	1.35	1.77	1.06	242.353	118.667	2.33333	1.39333	0.743852	0.743852	0.0384713	0.800877	no
comp15917_c0	comp15917_c0_seq1,comp15917_c0_seq10,comp15917_c0_seq11,comp15917_c0_seq12,comp15917_c0_seq13,comp15917_c0_seq14,comp15917_c0_seq15,comp15917_c0_seq16,comp15917_c0_seq17,comp15917_c0_seq18,comp15917_c0_seq19,comp15917_c0_seq2,comp15917_c0_seq20,comp15917_	2861	2362.76	Q8GZM7	phytochrome-interacting factor 3	GO:0005634(nucleus);GO:0003677(DNA binding);GO:0010313(phytochrome binding);GO:0003700(sequence-specific DNA binding transcription factor activity);GO:0015995(chlorophyll biosynthetic process);GO:0009740(gibberellic acid mediated signaling pathway);GO:000	-	K12126	ko04712(Circadian rhythm - plant)	1676.76	1593.46	1926.71	1112.55	677.65	1467.32	19.81	17.08	15.78	12.78	12.68	11.74	1732.31	1085.84	17.5567	12.4	0.501679	0.501679	0.040832	0.800877	no
comp13524_c0	comp13524_c0_seq1,comp13524_c0_seq2,comp13524_c0_seq3,comp13524_c0_seq4,comp13524_c0_seq5	2357	2190.55	B6TCE8	-	GO:0005634(nucleus)	-	-	-	559.99	531.08	663.01	316.97	219	480.99	6.89	5.8	6.07	3.82	4.17	4.25	584.693	338.987	6.25333	4.08	0.616056	0.616056	0.0125186	0.800877	no
comp882_c0	comp882_c0_seq1	267	267	-	-	-	-	-	-	5	6	6	4	2	4.59	0.68	0.72	0.58	0.55	0.43	0.43	5.66667	3.53	0.66	0.47	0.489805	0.489805	0.0302617	0.800877	no
comp41838_c0	comp41838_c0_seq1	619	619	-	-	-	-	-	-	127.04	142	155	82	58	137	6.13	5.99	5.31	4.03	4.37	4.55	141.347	92.3333	5.81	4.31667	0.42862	0.42862	0.0120107	0.800877	no
comp16246_c0	comp16246_c0_seq1	588	588	Q9M0X5	-	GO:0016021(integral to membrane);GO:0005524(ATP binding);GO:0004674(protein serine/threonine kinase activity);GO:0004872(receptor activity)	-	-	-	9	9	12	3	4	6	0.46	0.4	0.44	0.16	0.32	0.21	10	4.33333	0.433333	0.23	0.913843	0.913843	0.0370961	0.800877	no
comp106996_c0	comp106996_c0_seq1	437	437	-	-	-	-	-	-	18	17	21	12.04	6	14	1.3	1.08	1.08	0.89	0.68	0.7	18.6667	10.68	1.15333	0.756667	0.60808	0.60808	0.0164553	0.800877	no
comp9559_c0	comp9559_c0_seq1,comp9559_c0_seq2	2186	1733.57	P33303	-	GO:0016021(integral to membrane);GO:0005743(mitochondrial inner membrane);GO:0005488(binding);GO:0005469(succinate:fumarate antiporter activity)	[C] Energy production and conversion	-	-	615.61	665.84	869.85	443.11	304	712.96	10.04	9.61	10.22	7.43	7.88	8.18	717.1	486.69	9.95667	7.83	0.346651	0.346651	0.00192036	0.800877	no
comp13239_c0	comp13239_c0_seq1	895	895	Q9LM33	-	GO:0005886(plasma membrane);GO:0005524(ATP binding);GO:0005516(calmodulin binding);GO:0004707(MAP kinase activity);GO:0042542(response to hydrogen peroxide);GO:0009753(response to jasmonic acid stimulus);GO:0009611(response to wounding)	[T] Signal transduction mechanisms	K00924	-	386	433.78	562.4	338.01	225	531	12.36	12.15	12.8	11.02	11.25	11.71	460.727	364.67	12.4367	11.3267	0.134877	0.134877	0.0165211	0.800877	no
comp19676_c0	comp19676_c0_seq1	569	569	Q8BTE0	-	GO:0005576(extracellular region);GO:0005739(mitochondrion)	[S] Function unknown	-	-	670.83	560	967.87	866.98	582	1175.23	35.63	26.03	36.54	46.87	48.25	43	732.9	874.737	32.7333	46.04	-0.492127	0.492127	0.0407104	0.800877	no
comp15968_c2	comp15968_c2_seq1,comp15968_c2_seq10,comp15968_c2_seq11,comp15968_c2_seq12,comp15968_c2_seq13,comp15968_c2_seq14,comp15968_c2_seq15,comp15968_c2_seq16,comp15968_c2_seq17,comp15968_c2_seq18,comp15968_c2_seq19,comp15968_c2_seq2,comp15968_c2_seq20,comp15968_	2145	768.93	-	-	-	[R] General function prediction only	-	-	1863	1710.2	2646.85	1287.93	559.22	2078.67	63.54	50.58	55.76	38.09	33.76	43.56	2073.35	1308.61	56.6267	38.47	0.557748	0.557748	0.0209635	0.800877	no
comp321833_c0	comp321833_c0_seq1	324	324	-	-	-	-	-	-	6	5	6	9	6	10	0.63	0.46	0.45	0.96	0.98	0.72	5.66667	8.33333	0.513333	0.886667	-0.788496	0.788496	0.0260993	0.800877	no
comp9818_c0	comp9818_c0_seq1,comp9818_c0_seq2,comp9818_c0_seq3,comp9818_c0_seq4	1096	967.19	-	-	-	-	-	-	80	85	86.49	54	29	59	2.4	2.32	1.83	1.58	1.31	1.28	83.83	47.3333	2.18333	1.39	0.651448	0.651448	0.0283831	0.800877	no
comp16044_c2	comp16044_c2_seq1,comp16044_c2_seq10,comp16044_c2_seq11,comp16044_c2_seq12,comp16044_c2_seq13,comp16044_c2_seq14,comp16044_c2_seq2,comp16044_c2_seq3,comp16044_c2_seq4,comp16044_c2_seq5,comp16044_c2_seq6,comp16044_c2_seq7,comp16044_c2_seq8,comp16044_c2_seq	3590	2554.34	Q9LVM1	mitochondrial ABC transporter ATM	GO:0009941(chloroplast envelope);GO:0016021(integral to membrane);GO:0005743(mitochondrial inner membrane);GO:0005524(ATP binding);GO:0042626(ATPase activity, coupled to transmembrane movement of substances);GO:0006879(cellular iron ion homeostasis);GO:00	[U] Intracellular trafficking, secretion, and vesicular transport	K05663	ko02010(ABC transporters)	2333.46	2667.36	3114.22	1561.35	1228.86	3023.7	24.83	24.04	21.91	15.79	17.37	19.76	2705.01	1937.97	23.5933	17.64	0.419529	0.419529	0.0169696	0.800877	no
comp223744_c0	comp223744_c0_seq1	292	292	-	-	-	-	-	-	10	8.02	13	4.47	4	8	1.21	0.85	1.11	0.55	0.75	0.66	10.34	5.49	1.05667	0.653333	0.693629	0.693629	0.0438797	0.800877	no
comp88846_c0	comp88846_c0_seq1	1331	1331	-	-	-	-	-	-	69	99.03	99.36	47	31	63	1.44	1.81	1.48	1	1.01	0.91	89.13	47	1.57667	0.973333	0.695872	0.695872	0.028762	0.800877	no
comp10288_c0	comp10288_c0_seq1,comp10288_c0_seq2	268	249.61	-	-	-	-	-	-	66.33	71	74	30	23	64.06	9.25	8.7	7.7	4.3	5.02	6.47	70.4433	39.02	8.55	5.26333	0.699948	0.699948	0.0169829	0.800877	no
comp337093_c0	comp337093_c0_seq1	276	276	-	-	-	-	-	-	8	8.44	10.08	4	3	6	1.04	0.96	0.93	0.53	0.61	0.54	8.84	4.33333	0.976667	0.56	0.802439	0.802439	0.00075498	0.800877	no
comp243712_c0	comp243712_c0_seq1	840	840	-	-	-	-	-	-	19	23	25	10	6	15	0.65	0.69	0.61	0.35	0.32	0.35	22.3333	10.3333	0.65	0.34	0.934905	0.934905	0.0018142	0.800877	no
comp43551_c0	comp43551_c0_seq1	3408	3408	-	-	-	-	-	-	871.9	814.93	1164.89	314	353.35	537.03	6.88	5.62	6.53	2.52	4.35	2.92	950.573	401.46	6.34333	3.26333	0.958895	0.958895	0.0136331	0.800877	no
comp9465_c0	comp9465_c0_seq1,comp9465_c0_seq2	1899	1527.45	Q94B59	-	GO:0005739(mitochondrion);GO:0005488(binding)	[R] General function prediction only	-	-	487.83	475.01	550.92	284.44	230	448	8.89	7.58	7.12	5.29	6.4	5.55	504.587	320.813	7.86333	5.74667	0.452416	0.452416	0.0361718	0.800877	no
comp15485_c2	comp15485_c2_seq1,comp15485_c2_seq2	3314	3245.12	F4IB81	-	-	-	K00924	-	6839.35	6488.58	8003.54	3068.69	2517.26	7388.85	56.74	47.11	47.18	25.95	32.55	42.24	7110.49	4324.93	50.3433	33.58	0.584199	0.584199	0.049985	0.800877	no
comp71064_c0	comp71064_c0_seq1	1616	1616	-	-	-	-	-	-	106	112	124	63.92	52	116	1.81	1.67	1.5	1.11	1.38	1.36	114	77.3067	1.66	1.28333	0.371287	0.371287	0.0392941	0.800877	no
comp19422_c1	comp19422_c1_seq1	4225	4225	Q8YQL2	carbamoyl-phosphate synthase large subunit	GO:0005524(ATP binding);GO:0004088(carbamoyl-phosphate synthase (glutamine-hydrolyzing) activity);GO:0046872(metal ion binding);GO:0006526(arginine biosynthetic process);GO:0006221(pyrimidine nucleotide biosynthetic process)	[R] General function prediction only	K01955	ko00240(Pyrimidine metabolism);ko00250(Alanine, aspartate and glutamate metabolism)	9028.49	9499.75	8988.54	4190.17	3194.56	6808.43	57.18	52.65	40.47	27.02	31.58	29.71	9172.26	4731.05	50.1	29.4367	0.767196	0.767196	0.0457621	0.800877	no
comp7180_c0	comp7180_c0_seq1	357	357	-	-	-	-	-	-	10	13	14	5	3.01	9	0.93	1.06	0.92	0.47	0.44	0.58	12.3333	5.67	0.97	0.496667	0.965707	0.965707	0.00160275	0.800877	no
comp748_c0	comp748_c0_seq1	1036	1036	Q9LFG8	ATP-binding cassette, subfamily G (WHITE), member 4	GO:0016021(integral to membrane);GO:0005524(ATP binding);GO:0016887(ATPase activity);GO:0006810(transport)	[Q] Secondary metabolites biosynthesis, transport and catabolism	K05680	ko02010(ABC transporters)	24	35	34	16	11	21	0.66	0.84	0.66	0.45	0.47	0.4	31	16	0.72	0.44	0.710493	0.710493	0.0319569	0.800877	no
comp103196_c0	comp103196_c0_seq1	360	360	-	-	-	-	-	-	22	33	30	17	8.2	13	2.02	2.65	1.96	1.59	1.18	0.82	28.3333	12.7333	2.21	1.19667	0.885025	0.885025	0.0318561	0.800877	no
comp15783_c0	comp15783_c0_seq1,comp15783_c0_seq10,comp15783_c0_seq11,comp15783_c0_seq2,comp15783_c0_seq3,comp15783_c0_seq4,comp15783_c0_seq5,comp15783_c0_seq6,comp15783_c0_seq7,comp15783_c0_seq8,comp15783_c0_seq9	3852	2822.62	Q9SV46	-	GO:0005739(mitochondrion);GO:0005488(binding)	[R] General function prediction only	-	-	487.03	540.79	564.02	340	213	539.11	3.9	3.54	3.25	2.94	2.51	3.03	530.613	364.037	3.56333	2.82667	0.334126	0.334126	0.0419931	0.800877	no
comp31309_c0	comp31309_c0_seq1	870	870	-	-	-	-	-	-	51	41.25	70.99	26	15	45.01	1.68	1.19	1.67	0.87	0.77	1.02	54.4133	28.67	1.51333	0.886667	0.771266	0.771266	0.0435278	0.800877	no
comp16957_c0	comp16957_c0_seq1,comp16957_c0_seq2	2678	2362.9	Q06FW7	photosystem II PsbM protein	GO:0009535(chloroplast thylakoid membrane);GO:0016021(integral to membrane);GO:0009523(photosystem II);GO:0019684(photosynthesis, light reaction)	-	K02714	ko00195(Photosynthesis)	820.98	574.01	1488.67	726.35	492.19	868.6	10.15	8.88	11.39	7.75	7.76	6.21	961.22	695.713	10.14	7.24	0.485996	0.485996	0.0360215	0.800877	no
comp6845_c0	comp6845_c0_seq1,comp6845_c0_seq2	1797	1660.24	Q9SKU1	-	-	-	-	-	119.08	100.98	203.02	244.99	142.28	287.05	1.82	1.55	2.37	3.93	3.67	3.11	141.027	224.773	1.91333	3.57	-0.899836	0.899836	0.00834798	0.800877	no
comp133923_c0	comp133923_c0_seq1	502	502	-	-	-	-	-	-	36	41	44	17	14	19	2.21	2.2	1.92	1.06	1.34	0.8	40.3333	16.6667	2.11	1.06667	0.984134	0.984134	0.00812141	0.800877	no
comp68917_c0	comp68917_c0_seq1	1107	1107	-	-	-	-	-	-	146.13	125.37	168.57	32	41	135	3.72	2.79	3.05	0.83	1.63	2.37	146.69	69.3333	3.18667	1.61	0.984987	0.984987	0.0497095	0.800877	no
comp1524_c0	comp1524_c0_seq1	986	986	-	-	-	-	-	-	22.99	35	34	15	12	14	0.66	0.88	0.7	0.44	0.54	0.28	30.6633	13.6667	0.746667	0.42	0.830075	0.830075	0.0329548	0.800877	no
comp13356_c0	comp13356_c0_seq1,comp13356_c0_seq2,comp13356_c0_seq3	2787	2594.91	Q4V9P6	adenosine deaminase	GO:0004000(adenosine deaminase activity);GO:0046872(metal ion binding);GO:0009168(purine ribonucleoside monophosphate biosynthetic process)	[F] Nucleotide transport and metabolism	K01488	ko00230(Purine metabolism);ko05340(Primary immunodeficiency)	5065.03	4521.01	5851.88	2567.29	2304.15	4594.04	53.48	41.85	43.81	26.2	36.4	32.62	5145.97	3155.16	46.38	31.74	0.547201	0.547201	0.0366405	0.800877	no
comp16181_c0	comp16181_c0_seq1,comp16181_c0_seq2,comp16181_c0_seq3,comp16181_c0_seq4	1073	833.69	-	-	-	-	-	-	147.72	163.89	182.06	126	71	163.37	4.61	4.72	4.51	4.04	3.65	3.75	164.557	120.123	4.61333	3.81333	0.274757	0.274757	0.00893804	0.800877	no
comp102501_c0	comp102501_c0_seq1	727	727	-	-	-	-	-	-	38	55	55	17.69	14	41.88	1.53	1.94	1.57	0.72	0.88	1.16	49.3333	24.5233	1.68	0.92	0.868755	0.868755	0.0142877	0.800877	no
comp6876_c0	comp6876_c0_seq1	967	967	-	-	-	-	-	-	61	93	113	42	37	45	1.8	2.4	2.36	1.26	1.7	0.91	89	41.3333	2.18667	1.29	0.761362	0.761362	0.041595	0.800877	no
comp12046_c0	comp12046_c0_seq1,comp12046_c0_seq2,comp12046_c0_seq3	2941	1759.61	Q8S3N1	E3 ubiquitin-protein ligase SIAH1	GO:0005737(cytoplasm);GO:0005634(nucleus);GO:0004842(ubiquitin-protein ligase activity);GO:0008270(zinc ion binding);GO:0007275(multicellular organismal development);GO:0006511(ubiquitin-dependent protein catabolic process)	[R] General function prediction only	K04506	ko04115(p53 signaling pathway);ko04120(Ubiquitin mediated proteolysis);ko04310(Wnt signaling pathway)	956.56	914.96	1334.76	730.2	364.69	1077.4	14.42	11.91	13.67	10.16	8.88	10.45	1068.76	724.097	13.3333	9.83	0.439774	0.439774	0.0225477	0.800877	no
comp812240_c0	comp812240_c0_seq1	292	292	-	-	-	[R] General function prediction only	-	-	2	4	5	6	4	8	0.24	0.42	0.43	0.74	0.75	0.66	3.66667	6	0.363333	0.716667	-0.980009	0.980009	0.0161876	0.800877	no
comp16124_c0	comp16124_c0_seq1,comp16124_c0_seq10,comp16124_c0_seq11,comp16124_c0_seq12,comp16124_c0_seq13,comp16124_c0_seq14,comp16124_c0_seq15,comp16124_c0_seq16,comp16124_c0_seq17,comp16124_c0_seq2,comp16124_c0_seq3,comp16124_c0_seq4,comp16124_c0_seq5,comp16124_c0_	2021	1009.26	Q9FK93	small multidrug resistance protein, SMR family	GO:0005488(binding)	[R] General function prediction only	K03297	-	345.95	380	379.12	213.19	182	349.99	8.98	7.55	7.42	5.23	5.58	5.89	368.357	248.393	7.98333	5.56667	0.520178	0.520178	0.0280054	0.800877	no
comp8407_c0	comp8407_c0_seq1,comp8407_c0_seq2	630	619.5	P29344	small subunit ribosomal protein S1	GO:0009507(chloroplast);GO:0005840(ribosome);GO:0003723(RNA binding);GO:0003735(structural constituent of ribosome);GO:0006412(translation)	-	K02945	ko03010(Ribosome)	89.9	122.27	116	45.83	41	84	4.34	5.15	3.99	2.24	3.08	2.78	109.39	56.9433	4.49333	2.7	0.734827	0.734827	0.0162812	0.800877	no
comp16902_c1	comp16902_c1_seq1,comp16902_c1_seq10,comp16902_c1_seq11,comp16902_c1_seq12,comp16902_c1_seq13,comp16902_c1_seq2,comp16902_c1_seq3,comp16902_c1_seq4,comp16902_c1_seq5,comp16902_c1_seq6,comp16902_c1_seq7,comp16902_c1_seq8,comp16902_c1_seq9	1718	1226.09	Q9LNF4	protein phosphatase	GO:0008287(protein serine/threonine phosphatase complex);GO:0046872(metal ion binding);GO:0004722(protein serine/threonine phosphatase activity);GO:0006470(protein dephosphorylation)	[T] Signal transduction mechanisms	K01090	-	716.95	806.25	1015.15	565	423.87	944.5	18.84	17.47	19.14	15.05	16.68	14.98	846.117	644.457	18.4833	15.57	0.247456	0.247456	0.0185087	0.800877	no
comp536023_c0	comp536023_c0_seq1	250	250	-	-	-	-	-	-	4	7	7	3	1	4.36	0.6	0.92	0.74	0.46	0.23	0.45	6	2.78667	0.753333	0.38	0.987289	0.987289	0.0372075	0.800877	no
comp1746_c0	comp1746_c0_seq1	1680	1680	-	-	-	-	-	-	76	98.97	110	64.98	35.04	100	1.24	1.42	1.28	1.08	0.9	1.13	94.99	66.6733	1.31333	1.03667	0.341281	0.341281	0.0383295	0.800877	no
comp11126_c0	comp11126_c0_seq1,comp11126_c0_seq2	421	419.16	-	-	-	-	-	-	4	8	10	12	8	13	0.31	0.53	0.54	0.93	0.95	0.68	7.33333	11	0.46	0.853333	-0.891476	0.891476	0.0275099	0.800877	no
comp390547_c0	comp390547_c0_seq1	536	536	-	-	-	-	-	-	10	8	20	15	12	32	0.57	0.4	0.81	0.87	1.07	1.25	12.6667	19.6667	0.593333	1.06333	-0.841679	0.841679	0.0442707	0.800877	no
comp16581_c0	comp16581_c0_seq1,comp16581_c0_seq10,comp16581_c0_seq11,comp16581_c0_seq12,comp16581_c0_seq2,comp16581_c0_seq3,comp16581_c0_seq4,comp16581_c0_seq5,comp16581_c0_seq6,comp16581_c0_seq7,comp16581_c0_seq8,comp16581_c0_seq9	3995	3171.1	Q9C8E7	glutamate receptor, ionotropic, other eukaryote	GO:0016021(integral to membrane);GO:0030288(outer membrane-bounded periplasmic space);GO:0005886(plasma membrane);GO:0005262(calcium channel activity);GO:0005234(extracellular-glutamate-gated ion channel activity);GO:0004965(GABA-B receptor activity);GO:0	[P] Inorganic ion transport and metabolism ;[E] Amino acid transport and metabolism ;[T] Signal transduction mechanisms	K05387	-	8864.55	8558.17	10724.5	5415.04	4280.7	8756.41	70.35	57.48	58.85	43.79	52.15	45.72	9382.41	6150.72	62.2267	47.22	0.398135	0.398135	0.0451978	0.800877	no
comp29230_c0	comp29230_c0_seq1	1428	1428	-	-	-	-	-	-	313	278.15	354.01	140.99	74	244.8	6.08	4.73	4.89	2.79	2.24	3.27	315.053	153.263	5.23333	2.76667	0.919581	0.919581	0.0117767	0.800877	no
comp108_c1	comp108_c1_seq1	772	772	-	-	-	-	-	-	14	16	17	28	15	41	0.53	0.53	0.46	1.07	0.88	1.06	15.6667	28	0.506667	1.00333	-0.985692	0.985692	0.00823618	0.800877	no
comp96327_c0	comp96327_c0_seq1	937	937	-	-	-	-	-	-	28	30	35	13	7	25	0.85	0.8	0.76	0.4	0.33	0.52	31	15	0.803333	0.416667	0.947105	0.947105	0.00945419	0.800877	no
comp427177_c0	comp427177_c0_seq1	462	462	-	-	-	-	-	-	7	10.98	14.01	14	8	17	0.47	0.65	0.67	0.97	0.85	0.79	10.6633	13	0.596667	0.87	-0.54409	0.54409	0.0313046	0.800877	no
comp491992_c0	comp491992_c0_seq1	204	204	-	-	-	-	-	-	2	1	2	3	2	3	0.4	0.18	0.29	0.62	0.63	0.42	1.66667	2.66667	0.29	0.556667	-0.940761	0.940761	0.046359	0.800877	no
comp14178_c0	comp14178_c0_seq1,comp14178_c0_seq2	331	315.89	-	-	-	-	-	-	8	8	10	5	3	5	0.87	0.72	0.76	0.59	0.48	0.35	8.66667	4.33333	0.783333	0.473333	0.72677	0.72677	0.0262563	0.800877	no
comp6731_c0	comp6731_c0_seq1	454	454	-	-	-	-	-	-	38	42	40	18	11	26	2.63	2.54	1.97	1.27	1.19	1.24	40	18.3333	2.38	1.23333	0.948399	0.948399	0.0296444	0.800877	no
comp14771_c0	comp14771_c0_seq1,comp14771_c0_seq2,comp14771_c0_seq3,comp14771_c0_seq4,comp14771_c0_seq5	2957	1978.76	Q9SWG3	-	GO:0005634(nucleus);GO:0005515(protein binding);GO:0003700(sequence-specific DNA binding transcription factor activity);GO:0008270(zinc ion binding);GO:0010018(far-red light signaling pathway);GO:0042753(positive regulation of circadian rhythm);GO:0045893	-	-	-	385.16	344.44	374.01	199	174	293.02	4.75	3.95	4.12	2.29	3.07	2.7	367.87	222.007	4.27333	2.68667	0.669545	0.669545	0.00887297	0.800877	no
comp264608_c0	comp264608_c0_seq1	352	352	-	-	-	-	-	-	9	13.94	14	6	3	11	0.85	1.15	0.94	0.58	0.44	0.72	12.3133	6.66667	0.98	0.58	0.756729	0.756729	0.0295141	0.800877	no
comp16751_c0	comp16751_c0_seq1,comp16751_c0_seq2,comp16751_c0_seq3,comp16751_c0_seq4	1166	859.9	-	-	-	-	-	-	300	262.27	365.99	154.07	136.25	273.18	10.32	8.26	9	5.31	7.15	6.41	309.42	187.833	9.19333	6.29	0.547528	0.547528	0.0232112	0.800877	no
comp10180_c1	comp10180_c1_seq1	1348	1348	Q56XU4	-	GO:0003677(DNA binding);GO:0008270(zinc ion binding)	-	-	-	103	81	129	117	88	170	2.13	1.46	1.89	2.46	2.83	2.42	104.333	125	1.82667	2.57	-0.492555	0.492555	0.0415429	0.800877	no
comp4182_c0	comp4182_c0_seq1	585	585	-	-	-	-	-	-	12	16	21	9	4	11	0.62	0.72	0.77	0.47	0.32	0.39	16.3333	8	0.703333	0.393333	0.838456	0.838456	0.00742144	0.800877	no
comp9104_c2	comp9104_c2_seq1	265	265	-	-	-	[R] General function prediction only	-	-	3	4	6	5	5	11	0.41	0.48	0.59	0.7	1.07	1.04	4.33333	7	0.493333	0.936667	-0.924973	0.924973	0.047766	0.800877	no
comp27414_c0	comp27414_c0_seq1	3331	3331	-	-	-	-	-	-	1695.58	1645.73	2611.88	638.81	666.71	1810.34	13.69	11.62	14.99	5.25	8.4	10.07	1984.4	1038.62	13.4333	7.90667	0.764676	0.764676	0.0383041	0.800877	no
comp521_c0	comp521_c0_seq1	502	502	-	-	-	-	-	-	17	23	31.98	12.99	6	23	1.04	1.24	1.4	0.81	0.58	0.97	23.9933	13.9967	1.22667	0.786667	0.640919	0.640919	0.0462672	0.800877	no
comp417191_c0	comp417191_c0_seq1	263	263	-	-	-	-	-	-	2	3	5	6	3	6	0.28	0.37	0.49	0.85	0.65	0.57	3.33333	5	0.38	0.69	-0.860597	0.860597	0.0444625	0.800877	no
comp5791_c0	comp5791_c0_seq1	377	377	-	-	-	-	-	-	5	5.03	5	3	2	3	0.43	0.38	0.31	0.27	0.27	0.18	5.01	2.66667	0.373333	0.24	0.63743	0.63743	0.0451922	0.800877	no
comp18030_c0	comp18030_c0_seq1	4231	4231	Q8L5Y6	-	GO:0005618(cell wall);GO:0005829(cytosol);GO:0005886(plasma membrane);GO:0005515(protein binding);GO:0006355(regulation of transcription, DNA-dependent);GO:0009733(response to auxin stimulus);GO:0006351(transcription, DNA-dependent);GO:0010228(vegetative	[R] General function prediction only	-	-	5380.47	6001.58	7462.67	5609.47	3663.51	8582.98	34.03	33.21	33.55	36.11	36.17	37.39	6281.57	5951.99	33.5967	36.5567	-0.121816	0.121816	0.00724974	0.800877	no
comp53738_c0	comp53738_c0_seq1	689	689	-	-	-	-	-	-	33	37.85	49	16	14	25.03	1.41	1.42	1.49	0.7	0.93	0.74	39.95	18.3433	1.44	0.79	0.866144	0.866144	0.00639931	0.800877	no
comp683430_c0	comp683430_c0_seq1	246	246	-	-	-	-	-	-	1	2	3	3	2	4	0.15	0.27	0.33	0.47	0.48	0.42	2	3	0.25	0.456667	-0.869213	0.869213	0.0472354	0.800877	no
comp39406_c0	comp39406_c0_seq1	250	250	-	-	-	-	-	-	12.97	17	25.98	12	5.05	11	1.94	2.22	2.76	1.82	1.18	1.13	18.65	9.35	2.30667	1.37667	0.74463	0.74463	0.0472302	0.800877	no
comp14542_c0	comp14542_c0_seq1	283	283	-	-	-	-	-	-	22	29	30	7	8	22	2.77	3.19	2.68	0.9	1.57	1.91	27	12.3333	2.88	1.46	0.9801	0.9801	0.023548	0.800877	no
comp38283_c0	comp38283_c0_seq1	828	828	-	-	-	-	-	-	136.96	120.09	150	33	51	104	4.78	3.66	3.72	1.17	2.78	2.5	135.683	62.6667	4.05333	2.15	0.914772	0.914772	0.0410305	0.800877	no
comp23040_c0	comp23040_c0_seq1	1658	1658	Q9FM86	solute carrier family 25 (mitochondrial carrier; adenine nucleotide translocator)	GO:0016021(integral to membrane);GO:0005743(mitochondrial inner membrane);GO:0005347(ATP transmembrane transporter activity);GO:0005488(binding);GO:0048653(anther development)	[C] Energy production and conversion	K05863	ko04020(Calcium signaling pathway);ko05012(Parkinson's disease);ko05016(Huntington's disease)	612.59	533.8	610.92	245	245	376.98	10.17	7.75	7.21	4.14	6.35	4.31	585.77	288.993	8.37667	4.93333	0.763813	0.763813	0.043685	0.800877	no
comp13488_c0	comp13488_c0_seq1,comp13488_c0_seq2,comp13488_c0_seq3,comp13488_c0_seq4,comp13488_c0_seq5,comp13488_c0_seq6,comp13488_c0_seq7,comp13488_c0_seq8,comp13488_c0_seq9	4195	3615.74	Q9LU14	-	GO:0048046(apoplast);GO:0016788(hydrolase activity, acting on ester bonds);GO:0016042(lipid catabolic process)	-	-	-	564.93	442.42	596.44	192.21	203.98	351.06	4.25	3.37	2.97	1.44	2.25	1.74	534.597	249.083	3.53	1.81	0.963678	0.963678	0.025148	0.800877	no
comp5556_c0	comp5556_c0_seq1,comp5556_c0_seq2	984	967.12	Q9SLC3	-	GO:0016021(integral to membrane);GO:0004842(ubiquitin-protein ligase activity);GO:0008270(zinc ion binding)	[O] Posttranslational modification, protein turnover, chaperones	-	-	225	200	356.47	330.94	290	506.72	6.6	5.16	7.42	9.89	13.16	10.31	260.49	375.887	6.39333	11.12	-0.798517	0.798517	0.0241664	0.800877	no
comp19213_c0	comp19213_c0_seq1	543	543	O65554	-	GO:0005524(ATP binding);GO:0005515(protein binding);GO:0004674(protein serine/threonine kinase activity);GO:0010540(basipetal auxin transport);GO:0042538(hyperosmotic salinity response);GO:0007275(multicellular organismal development);GO:0009414(response	[T] Signal transduction mechanisms	K00924	-	635.94	811.15	990.63	470.06	277.97	651.17	35.65	39.79	39.47	26.82	24.32	25.15	812.573	466.4	38.3033	25.43	0.590938	0.590938	0.00297912	0.800877	no
comp174432_c0	comp174432_c0_seq1	579	579	-	-	-	-	-	-	27	37	32	12	9	25	1.41	1.69	1.18	0.64	0.73	0.9	32	15.3333	1.42667	0.756667	0.914918	0.914918	0.0273945	0.800877	no
comp4865_c0	comp4865_c0_seq1	1300	1300	-	-	-	-	-	-	23	25	51	49	25.99	74.67	0.49	0.47	0.78	1.07	0.87	1.1	33	49.8867	0.58	1.01333	-0.804984	0.804984	0.028821	0.800877	no
comp17824_c0	comp17824_c0_seq1	2471	2471	Q03685	heat shock 70kDa protein 5	GO:0005788(endoplasmic reticulum lumen);GO:0005524(ATP binding)	[O] Posttranslational modification, protein turnover, chaperones	K09490	ko03060(Protein export);ko05020(Prion diseases)	8442.03	12413.4	14979.8	17289.8	10366.5	26070.8	92.59	119.13	116.79	193.04	177.48	196.99	11945	17909	109.503	189.17	-0.788709	0.788709	0.00237306	0.800877	no
comp1806_c0	comp1806_c0_seq1,comp1806_c0_seq2	497	461.42	-	-	-	-	-	-	18	23	22	9	8	15	1.21	1.28	0.99	0.6	0.81	0.66	21	10.6667	1.16	0.69	0.749457	0.749457	0.0148206	0.800877	no
comp6276_c0	comp6276_c0_seq1,comp6276_c0_seq2	536	513.6	-	-	-	-	-	-	107	113	189.93	49	31.01	114	6.12	5.65	7.8	2.92	2.77	4.5	136.643	64.67	6.52333	3.39667	0.94149	0.94149	0.0227028	0.800877	no
comp35786_c0	comp35786_c0_seq1	1775	1775	-	-	-	-	-	-	255.03	240	311.13	183	99	265.52	3.94	3.25	3.42	2.88	2.39	2.83	268.72	182.507	3.53667	2.7	0.389431	0.389431	0.0358014	0.800877	no
comp200890_c0	comp200890_c0_seq1	848	848	-	-	-	-	-	-	13	13	20	6	6	11	0.44	0.39	0.48	0.21	0.32	0.26	15.3333	7.66667	0.436667	0.263333	0.729642	0.729642	0.0146344	0.800877	no
comp9811_c0	comp9811_c0_seq1,comp9811_c0_seq2	1006	627.99	-	-	-	-	-	-	110.64	122	94	30.04	42	97.01	4.52	4.02	3.05	1.53	2.59	2.06	108.88	56.35	3.86333	2.06	0.907202	0.907202	0.0318051	0.800877	no
comp17441_c0	comp17441_c0_seq1	1075	1075	Q9MB94	aminocyclopropanecarboxylate oxidase	GO:0009815(1-aminocyclopropane-1-carboxylate oxidase activity);GO:0031418(L-ascorbic acid binding);GO:0046872(metal ion binding);GO:0016706(oxidoreductase activity, acting on paired donors, with incorporation or reduction of molecular oxygen, 2-oxoglutara	[Q] Secondary metabolites biosynthesis, transport and catabolism ;[R] General function prediction only	K05933	ko00270(Cysteine and methionine metabolism)	17746.9	19486.2	18350	4374.31	7392.01	11834.7	466.11	447.82	342.58	116.95	303.04	214.13	18527.7	7867	418.837	211.373	0.986594	0.986594	0.0399512	0.800877	no
comp299715_c0	comp299715_c0_seq1	656	656	O64495	subtilisin	GO:0048046(apoplast);GO:0009897(external side of plasma membrane);GO:0042802(identical protein binding);GO:0004252(serine-type endopeptidase activity);GO:0043086(negative regulation of catalytic activity);GO:0006508(proteolysis);GO:0042127(regulation of c	-	K01342	-	14	15	25	9	4	16	0.63	0.59	0.8	0.41	0.28	0.5	18	9.66667	0.673333	0.396667	0.763394	0.763394	0.0379891	0.800877	no
comp135423_c0	comp135423_c0_seq1	435	435	-	-	-	-	-	-	17	21	22	12	8	13	1.24	1.34	1.14	0.89	0.91	0.65	20	11	1.24	0.816667	0.602521	0.602521	0.0178954	0.800877	no
comp25998_c0	comp25998_c0_seq1	3022	3022	-	-	-	-	-	-	1006.02	1136.32	1291.98	1178.53	746.19	1572.78	8.97	8.87	8.19	10.7	10.39	9.66	1144.77	1165.83	8.67667	10.25	-0.240411	0.240411	0.0178477	0.800877	no
comp13890_c0	comp13890_c0_seq1,comp13890_c0_seq2	1453	1371.18	-	-	-	-	-	-	92	117	127.75	71	49	88	1.75	1.95	1.73	1.38	1.46	1.16	112.25	69.3333	1.81	1.33333	0.440952	0.440952	0.0155825	0.800877	no
comp253424_c0	comp253424_c0_seq1	1680	1680	-	-	-	-	-	-	55	64	69	27	20	52	0.9	0.92	0.8	0.45	0.51	0.59	62.6667	33	0.873333	0.516667	0.757299	0.757299	0.00298927	0.800877	no
comp15136_c0	comp15136_c0_seq1,comp15136_c0_seq2	1351	1329.69	-	-	-	-	-	-	58.93	60	91	39.11	28.63	75.95	1.24	1.1	1.34	0.83	0.92	1.08	69.9767	47.8967	1.22667	0.943333	0.378904	0.378904	0.0486005	0.800877	no
comp11902_c0	comp11902_c0_seq1,comp11902_c0_seq2	2201	2109.04	Q9SLB9	-	-	-	-	-	559.98	568.06	777.97	400.01	246	589.83	7.15	6.25	7.26	5.09	4.8	5.13	635.337	411.947	6.88667	5.00667	0.459955	0.459955	0.0196187	0.800877	no
comp11777_c0	comp11777_c0_seq1,comp11777_c0_seq2,comp11777_c0_seq3	2913	1519.69	F6HDM2	-	-	[G] Carbohydrate transport and metabolism	-	-	6418.79	5297.63	6270.07	2896.91	2499.96	4188.91	132.04	101.5	89.52	53.87	77.66	55.2	5995.5	3195.26	107.687	62.2433	0.790848	0.790848	0.0481923	0.800877	no
comp15704_c1	comp15704_c1_seq1,comp15704_c1_seq2,comp15704_c1_seq3,comp15704_c1_seq4,comp15704_c1_seq5	2805	2374.04	Q9SEK3	hexokinase	GO:0009707(chloroplast outer membrane);GO:0016021(integral to membrane);GO:0005524(ATP binding);GO:0004396(hexokinase activity);GO:0006096(glycolysis)	[G] Carbohydrate transport and metabolism	K00844	ko00010(Glycolysis / Gluconeogenesis);ko00051(Fructose and mannose metabolism);ko00052(Galactose metabolism);ko00500(Starch and sucrose metabolism);ko00520(Amino sugar and nucleotide sugar metabolism);ko00521(Streptomycin biosynthesis);ko00524(Butirosin a	1520.56	1490.29	1715.33	1003.85	754.62	1600.51	17.15	15.33	14.42	11.64	13.36	12.94	1575.39	1119.66	15.6333	12.6467	0.305868	0.305868	0.0437052	0.800877	no
comp181464_c0	comp181464_c0_seq1	464	464	-	-	-	-	-	-	16	17	19	8	7	12	1.08	1	0.91	0.55	0.74	0.56	17.3333	9	0.996667	0.616667	0.69262	0.69262	0.00965477	0.800877	no
comp15548_c0	comp15548_c0_seq1,comp15548_c0_seq10,comp15548_c0_seq11,comp15548_c0_seq12,comp15548_c0_seq13,comp15548_c0_seq14,comp15548_c0_seq15,comp15548_c0_seq16,comp15548_c0_seq17,comp15548_c0_seq18,comp15548_c0_seq19,comp15548_c0_seq2,comp15548_c0_seq3,comp15548_c	2990	1792.62	-	-	-	[I] Lipid transport and metabolism ;[O] Posttranslational modification, protein turnover, chaperones ;[T] Signal transduction mechanisms	-	-	600.05	657.51	688.67	420.33	282	692.96	8.72	7.9	7.08	5.52	6.4	6.03	648.743	465.097	7.9	5.98333	0.400903	0.400903	0.0363134	0.800877	no
comp10073_c0	comp10073_c0_seq1,comp10073_c0_seq2,comp10073_c0_seq3	946	813.97	-	-	-	-	-	-	207.01	183	258.58	129	74.94	195.11	6.96	5.68	6.55	4.45	4.46	4.68	216.197	133.017	6.39667	4.53	0.497809	0.497809	0.0342852	0.800877	no
comp28733_c0	comp28733_c0_seq1	2820	2820	-	-	-	-	-	-	689	746.97	903.23	462.14	332	786.87	6.6	6.26	6.15	4.5	4.96	5.19	779.733	527.003	6.33667	4.88333	0.375858	0.375858	0.00608691	0.800877	no
comp13236_c0	comp13236_c0_seq1	546	546	-	-	-	-	-	-	146	179.99	145.01	78	38	107	8.13	8.77	5.74	4.42	3.3	4.11	157	74.3333	7.54667	3.94333	0.936424	0.936424	0.0466069	0.800877	no
comp5920_c0	comp5920_c0_seq1	1521	1521	-	-	-	-	-	-	53	62	74	34.99	26	58	0.96	0.99	0.96	0.65	0.74	0.73	63	39.6633	0.97	0.706667	0.456955	0.456955	0.00632633	0.800877	no
comp278395_c0	comp278395_c0_seq1	607	607	-	-	-	-	-	-	11	11	13	8.02	4	12	0.54	0.47	0.46	0.4	0.31	0.41	11.6667	8.00667	0.49	0.373333	0.392317	0.392317	0.0480051	0.800877	no
comp73774_c0	comp73774_c0_seq1	813	813	-	-	-	-	-	-	61	48.9	77.61	40	17.99	43	2.17	1.52	1.96	1.45	1	1.05	62.5033	33.6633	1.88333	1.16667	0.690896	0.690896	0.0440999	0.800877	no
comp15622_c0	comp15622_c0_seq1,comp15622_c0_seq2,comp15622_c0_seq3	1401	1168.68	Q18779	-	GO:0000139(Golgi membrane);GO:0016021(integral to membrane);GO:0008643(carbohydrate transport);GO:0009792(embryo development ending in birth or egg hatching);GO:0002009(morphogenesis of an epithelium);GO:0018991(oviposition);GO:0040025(vulval development)	[G] Carbohydrate transport and metabolism ;[O] Posttranslational modification, protein turnover, chaperones ;[U] Intracellular trafficking, secretion, and vesicular transport	-	-	175.98	158.04	186	97.99	46	138.41	4.07	3.02	3.06	2.17	1.63	2.28	173.34	94.1333	3.38333	2.02667	0.739336	0.739336	0.037778	0.800877	no
comp13554_c0	comp13554_c0_seq1,comp13554_c0_seq2,comp13554_c0_seq3,comp13554_c0_seq4,comp13554_c0_seq5	2914	2397.16	Q51363	L-aspartate oxidase	GO:0005737(cytoplasm);GO:0009055(electron carrier activity);GO:0008734(L-aspartate oxidase activity);GO:0044318(L-aspartate:fumarate oxidoreductase activity);GO:0009435(NAD biosynthetic process)	[C] Energy production and conversion	K00278	ko00250(Alanine, aspartate and glutamate metabolism);ko00760(Nicotinate and nicotinamide metabolism)	292	339.14	616.05	490	420.13	775.51	3.33	3.35	4.99	5.35	7.02	5.67	415.73	561.88	3.89	6.01333	-0.628395	0.628395	0.0478075	0.800877	no
comp98494_c0	comp98494_c0_seq1	659	659	-	-	-	-	-	-	48.96	47	57.03	30	17	35	2.2	1.85	1.82	1.37	1.19	1.08	50.9967	27.3333	1.95667	1.21333	0.689422	0.689422	0.0100434	0.800877	no
comp9599_c0	comp9599_c0_seq1	283	283	-	-	-	-	-	-	3	3	5	2	1	3	0.38	0.33	0.45	0.26	0.2	0.26	3.66667	2	0.386667	0.24	0.688056	0.688056	0.0319197	0.800877	no
comp251398_c0	comp251398_c0_seq1	1097	1097	-	-	-	-	-	-	31	39	56	22	10	38	0.8	0.88	1.02	0.58	0.4	0.67	42	23.3333	0.9	0.55	0.710493	0.710493	0.0284482	0.800877	no
comp2635_c0	comp2635_c0_seq1	1408	1408	-	-	-	-	-	-	594.02	503.98	700.01	188.69	258.85	399.18	11.71	8.69	9.81	3.79	7.96	5.42	599.337	282.24	10.07	5.72333	0.815136	0.815136	0.0493375	0.800877	no
comp428_c0	comp428_c0_seq1	918	918	-	-	-	-	-	-	38	43	45	19	15	40	1.18	1.17	1	0.6	0.73	0.86	42	24.6667	1.11667	0.73	0.61323	0.61323	0.0171795	0.800877	no
comp12974_c0	comp12974_c0_seq1,comp12974_c0_seq2,comp12974_c0_seq3,comp12974_c0_seq4,comp12974_c0_seq5,comp12974_c0_seq6	2043	1836.92	Q2QQS5	-	GO:0005634(nucleus);GO:0019901(protein kinase binding);GO:0007049(cell cycle);GO:0051301(cell division);GO:0000079(regulation of cyclin-dependent protein kinase activity);GO:0006355(regulation of transcription, DNA-dependent)	[D] Cell cycle control, cell division, chromosome partitioning	-	-	713.29	739.11	828.53	403.05	336.96	737.94	10.83	9.82	8.61	6.09	8.1	7.26	760.31	492.65	9.75333	7.15	0.447952	0.447952	0.0402917	0.800877	no
comp26784_c0	comp26784_c0_seq1	1623	1623	Q9FI00	mlo protein	GO:0016021(integral to membrane);GO:0005516(calmodulin binding);GO:0008219(cell death);GO:0006952(defense response);GO:0009607(response to biotic stimulus)	-	K08472	-	535.97	626.67	642.99	348.01	256.08	611.37	9.1	9.31	7.76	6.01	6.78	7.15	601.877	405.153	8.72333	6.64667	0.392249	0.392249	0.0296553	0.800877	no
comp18782_c0	comp18782_c0_seq1	1893	1893	Q9MT28	threonine synthase	GO:0009507(chloroplast);GO:0030170(pyridoxal phosphate binding);GO:0004795(threonine synthase activity);GO:0009088(threonine biosynthetic process)	-	K01733	ko00260(Glycine, serine and threonine metabolism);ko00750(Vitamin B6 metabolism)	2118.72	2282.4	3467.88	2806.72	1611.83	4537.34	30.62	28.86	35.63	41.3	36.36	45.18	2623	2985.3	31.7033	40.9467	-0.369111	0.369111	0.0498902	0.800877	no
comp11731_c0	comp11731_c0_seq1,comp11731_c0_seq2,comp11731_c0_seq3	3512	1826.57	Q9M2A0	H+-transporting ATPase	GO:0016021(integral to membrane);GO:0005886(plasma membrane);GO:0005524(ATP binding);GO:0008553(hydrogen-exporting ATPase activity, phosphorylative mechanism);GO:0046872(metal ion binding);GO:0006754(ATP biosynthetic process)	[P] Inorganic ion transport and metabolism	K01535	ko00190(Oxidative phosphorylation)	5286.11	4432	8296.96	3239.86	1688.45	6629.23	102.88	76.69	103.98	53.5	50.68	76.47	6005.02	3852.51	94.5167	60.2167	0.650406	0.650406	0.0474692	0.800877	no
comp15147_c0	comp15147_c0_seq1	970	970	Q9SZ67	-	GO:0009941(chloroplast envelope);GO:0031224(intrinsic to membrane);GO:0005634(nucleus);GO:0005524(ATP binding);GO:0017111(nucleoside-triphosphatase activity);GO:0005515(protein binding);GO:0004674(protein serine/threonine kinase activity);GO:0043565(seque	-	-	-	52.87	47	57.01	26	19	25	1.55	1.21	1.19	0.78	0.87	0.51	52.2933	23.3333	1.31667	0.72	0.870821	0.870821	0.0201951	0.800877	no
comp8420_c0	comp8420_c0_seq1	2016	2016	-	-	-	-	-	-	74	110.65	159	159	79	197.18	1	1.31	1.53	2.19	1.67	1.84	114.55	145.06	1.28	1.9	-0.569856	0.569856	0.0460316	0.800877	no
comp328377_c0	comp328377_c0_seq1	598	598	-	-	-	-	-	-	12	13	23	20	13	25	0.6	0.57	0.82	1.02	1.02	0.86	16	19.3333	0.663333	0.966667	-0.543284	0.543284	0.0399397	0.800877	no
comp74820_c0	comp74820_c0_seq1	667	667	-	-	-	-	-	-	89	68	121	28	20	84	3.95	2.64	3.81	1.26	1.38	2.57	92.6667	44	3.46667	1.73667	0.997228	0.997228	0.0425767	0.800877	no
comp11894_c0	comp11894_c0_seq1,comp11894_c0_seq2	2783	2777.43	O08815	-	GO:0005737(cytoplasm);GO:0005524(ATP binding);GO:0003677(DNA binding);GO:0004518(nuclease activity);GO:0005515(protein binding);GO:0004674(protein serine/threonine kinase activity);GO:0006915(apoptosis);GO:0006289(nucleotide-excision repair);GO:0046777(pr	-	-	-	6686.87	7293.51	8909.1	5012.96	3357.41	8678.88	65.07	62.12	61.66	49.67	51	58.18	7629.83	5683.08	62.95	52.95	0.249576	0.249576	0.0480187	0.800877	no
comp69335_c0	comp69335_c0_seq1	993	993	-	-	-	-	-	-	111.06	127.5	126	46	44	63.83	3.18	3.19	2.56	1.34	1.96	1.26	121.52	51.2767	2.97667	1.52	0.969626	0.969626	0.00876663	0.800877	no
comp16941_c0	comp16941_c0_seq1,comp16941_c0_seq10,comp16941_c0_seq11,comp16941_c0_seq12,comp16941_c0_seq13,comp16941_c0_seq14,comp16941_c0_seq15,comp16941_c0_seq16,comp16941_c0_seq17,comp16941_c0_seq18,comp16941_c0_seq19,comp16941_c0_seq2,comp16941_c0_seq20,comp16941_	3378	1336.35	Q9C8H0	ATP-binding cassette, subfamily C (CFTR/MRP), member 2	GO:0016021(integral to membrane);GO:0005524(ATP binding);GO:0008559(xenobiotic-transporting ATPase activity)	[Q] Secondary metabolites biosynthesis, transport and catabolism	K05666	ko02010(ABC transporters)	398	477.04	782.83	663	384	881.22	7.45	7.06	8.74	12.11	9.84	10.26	552.623	642.74	7.75	10.7367	-0.470278	0.470278	0.0297361	0.800877	no
comp16276_c0	comp16276_c0_seq1,comp16276_c0_seq10,comp16276_c0_seq11,comp16276_c0_seq12,comp16276_c0_seq13,comp16276_c0_seq14,comp16276_c0_seq15,comp16276_c0_seq2,comp16276_c0_seq3,comp16276_c0_seq4,comp16276_c0_seq5,comp16276_c0_seq6,comp16276_c0_seq7,comp16276_c0_se	2031	938.13	Q93ZB9	-	GO:0005783(endoplasmic reticulum);GO:0005488(binding);GO:0080019(fatty-acyl-CoA reductase (alcohol-forming) activity);GO:0010025(wax biosynthetic process)	[I] Lipid transport and metabolism	-	-	405.6	403.35	502.37	229	186	455.07	16.64	15.1	13.96	8.26	12.26	11.22	437.107	290.023	15.2333	10.58	0.525892	0.525892	0.0389323	0.800877	no
comp15760_c0	comp15760_c0_seq1,comp15760_c0_seq10,comp15760_c0_seq11,comp15760_c0_seq12,comp15760_c0_seq13,comp15760_c0_seq14,comp15760_c0_seq15,comp15760_c0_seq16,comp15760_c0_seq17,comp15760_c0_seq2,comp15760_c0_seq3,comp15760_c0_seq4,comp15760_c0_seq5,comp15760_c0_	3245	2317.19	Q8IYT8	unc51-like kinase	GO:0034045(pre-autophagosomal structure membrane);GO:0005524(ATP binding);GO:0005515(protein binding);GO:0004674(protein serine/threonine kinase activity);GO:0007409(axonogenesis);GO:0046777(protein autophosphorylation);GO:0010506(regulation of autophagy)	[O] Posttranslational modification, protein turnover, chaperones ;[U] Intracellular trafficking, secretion, and vesicular transport ;[T] Signal transduction mechanisms	K08269	ko04140(Regulation of autophagy);ko04150(mTOR signaling pathway)	1177.94	1210.84	1529.21	934.03	605.76	1532.85	13.5	12.48	12.63	10.95	11.18	12.09	1306	1024.21	12.87	11.4067	0.174135	0.174135	0.0364761	0.800877	no
comp94534_c0	comp94534_c0_seq1	856	856	-	-	-	-	-	-	30	25	31	13	12	20	1.01	0.74	0.74	0.44	0.63	0.46	28.6667	15	0.83	0.51	0.702614	0.702614	0.0494777	0.800877	no
comp19352_c0	comp19352_c0_seq1	1816	1816	P0CH30	E3 ubiquitin-protein ligase RNF115/126	GO:0016874(ligase activity);GO:0008270(zinc ion binding)	[O] Posttranslational modification, protein turnover, chaperones	K11982	-	976.22	1045.14	1454.41	534.02	495.15	1019.72	14.73	13.8	15.6	8.2	11.66	10.6	1158.59	682.963	14.71	10.1533	0.534844	0.534844	0.0291575	0.800877	no
comp12866_c0	comp12866_c0_seq1,comp12866_c0_seq2	4114	4036.55	O80536	phytochrome-interacting factor 3	-	-	K12126	ko04712(Circadian rhythm - plant)	1362.65	1367.04	1604.03	597.89	453.99	1265.39	8.99	8.09	7.57	4.01	4.79	5.79	1444.57	772.423	8.21667	4.86333	0.756608	0.756608	0.00801916	0.800877	no
comp21946_c0	comp21946_c0_seq1	1195	1195	O64425	E3 ubiquitin-protein ligase RNF5	GO:0005789(endoplasmic reticulum membrane);GO:0016021(integral to membrane);GO:0004842(ubiquitin-protein ligase activity);GO:0008270(zinc ion binding);GO:0032527(protein exit from endoplasmic reticulum);GO:0032940(secretion by cell);GO:0006511(ubiquitin-d	[O] Posttranslational modification, protein turnover, chaperones	K10666	-	466.32	376.84	574.97	209	147	342.92	10.94	7.73	9.59	4.99	5.38	5.54	472.71	232.973	9.42	5.30333	0.828828	0.828828	0.0438185	0.800877	no
comp8435_c1	comp8435_c1_seq1	703	703	-	-	-	-	-	-	78	117	157.02	46	44	98	3.26	4.28	4.66	1.96	2.87	2.82	117.34	62.6667	4.06667	2.55	0.673349	0.673349	0.0472824	0.800877	no
comp110473_c0	comp110473_c0_seq1	311	311	-	-	-	-	-	-	12	16.71	24	9	4	11.83	1.33	1.62	1.89	1.02	0.69	0.9	17.57	8.27667	1.61333	0.87	0.890957	0.890957	0.0248073	0.800877	no
comp224349_c0	comp224349_c0_seq1	393	393	-	-	-	-	-	-	9	12	11	7	3	8	0.74	0.87	0.64	0.59	0.39	0.45	10.6667	6	0.75	0.476667	0.65391	0.65391	0.0380845	0.800877	no
comp10884_c1	comp10884_c1_seq1	518	518	-	-	-	-	-	-	12	12	20	20	13	27	0.71	0.62	0.84	1.21	1.2	1.1	14.6667	20	0.723333	1.17	-0.693776	0.693776	0.00787051	0.800877	no
comp62239_c0	comp62239_c0_seq1	504	504	-	-	-	-	-	-	46	42	67	33	14	34	2.81	2.25	2.91	2.05	1.34	1.43	51.6667	27	2.65667	1.60667	0.725547	0.725547	0.0260563	0.800877	no
comp4499_c0	comp4499_c0_seq1	2407	2407	Q9SJ56	-	GO:0005737(cytoplasm);GO:0005634(nucleus);GO:0046982(protein heterodimerization activity);GO:0042803(protein homodimerization activity);GO:0043565(sequence-specific DNA binding);GO:0003700(sequence-specific DNA binding transcription factor activity);GO:00	[K] Transcription	-	-	5865.99	5603.26	6181.43	1979.05	2244.83	4359.3	66.1	55.25	49.51	22.7	39.49	33.84	5883.56	2861.06	56.9533	32.01	0.831258	0.831258	0.022753	0.800877	no
comp645020_c0	comp645020_c0_seq1	455	455	-	-	-	-	-	-	7	8	9	3	3	4	0.48	0.48	0.44	0.21	0.32	0.19	8	3.33333	0.466667	0.24	0.959358	0.959358	0.0216305	0.800877	no
comp11758_c0	comp11758_c0_seq1,comp11758_c0_seq2,comp11758_c0_seq3,comp11758_c0_seq4,comp11758_c0_seq5,comp11758_c0_seq6	1646	1522.92	Q8RU27	-	GO:0005618(cell wall);GO:0005576(extracellular region);GO:0005794(Golgi apparatus);GO:0009506(plasmodesma);GO:0008466(glycogenin glucosyltransferase activity);GO:0007047(cellular cell wall organization);GO:0030244(cellulose biosynthetic process)	-	-	-	5982.06	6564.88	11489.1	10331.8	5778.51	15508.6	109.57	104.72	149.62	191.81	163.34	195.15	8012	10539.7	121.303	183.433	-0.596637	0.596637	0.0279741	0.800877	no
comp13215_c0	comp13215_c0_seq1,comp13215_c0_seq2,comp13215_c0_seq3,comp13215_c0_seq4,comp13215_c0_seq5,comp13215_c0_seq6,comp13215_c0_seq7,comp13215_c0_seq8	2700	2590.88	Q9LK03	-	GO:0016021(integral to membrane);GO:0005886(plasma membrane);GO:0005524(ATP binding);GO:0004674(protein serine/threonine kinase activity);GO:0004872(receptor activity)	-	-	-	397.02	553.61	669.99	569.44	349.92	1015.08	4.13	5.05	4.94	6.06	5.77	7.29	540.207	644.813	4.70667	6.37333	-0.437342	0.437342	0.0485777	0.800877	no
comp132410_c0	comp132410_c0_seq1	277	277	-	-	-	-	-	-	18	18	17	8	7	11	2.33	2.04	1.56	1.05	1.42	0.98	17.6667	8.66667	1.97667	1.15	0.781436	0.781436	0.0451313	0.800877	no
comp121235_c0	comp121235_c0_seq1	244	244	Q9LTX9	heat shock 70kDa protein 1/8	-	[O] Posttranslational modification, protein turnover, chaperones	K03283	ko03040(Spliceosome);ko04010(MAPK signaling pathway);ko04144(Endocytosis);ko04612(Antigen processing and presentation)	8	9	13	13.99	7	21.98	1.24	1.22	1.43	2.2	1.69	2.34	10	14.3233	1.29667	2.07667	-0.679462	0.679462	0.0467043	0.800877	no
comp214357_c0	comp214357_c0_seq1	257	257	-	-	-	-	-	-	3	4	6	7	4	7	0.43	0.5	0.61	1.02	0.9	0.69	4.33333	6	0.513333	0.87	-0.761119	0.761119	0.0456214	0.800877	no
comp13119_c0	comp13119_c0_seq1	3169	3169	-	-	-	-	-	-	493.24	544.1	612.2	356	240	499.25	4.19	4.04	3.7	3.08	3.18	2.92	549.847	365.083	3.97667	3.06	0.378028	0.378028	0.0110639	0.800877	no
comp279162_c0	comp279162_c0_seq1	633	633	-	-	-	-	-	-	23	20	25.94	14	9	14	1.08	0.82	0.87	0.67	0.66	0.45	22.98	12.3333	0.923333	0.593333	0.638009	0.638009	0.0375146	0.800877	no
comp5723_c1	comp5723_c1_seq1	457	457	-	-	-	-	-	-	21	25	36	13	6	23	1.44	1.5	1.76	0.91	0.64	1.09	27.3333	14	1.56667	0.88	0.832123	0.832123	0.016027	0.800877	no
comp12689_c1	comp12689_c1_seq1,comp12689_c1_seq2	374	360.67	-	-	-	-	-	-	6.73	8.9	13	3.04	4	5	0.63	0.73	0.81	0.29	0.55	0.32	9.54333	4.01333	0.723333	0.386667	0.90357	0.90357	0.0336057	0.800877	no
comp18353_c0	comp18353_c0_seq1	1284	1284	Q9S7X6	spermidine synthase	GO:0005737(cytoplasm);GO:0016768(spermine synthase activity);GO:0010487(thermospermine synthase activity);GO:0009926(auxin polar transport);GO:0006596(polyamine biosynthetic process);GO:0009826(unidimensional cell growth);GO:0048759(vessel member cell dif	[E] Amino acid transport and metabolism	K00797	ko00270(Cysteine and methionine metabolism);ko00330(Arginine and proline metabolism);ko00410(beta-Alanine metabolism);ko00480(Glutathione metabolism)	4965.81	6719.15	6554.88	2578.3	1281.7	4698.66	107.9	127.74	101.24	57.03	43.47	70.33	6079.95	2852.89	112.293	56.9433	0.979673	0.979673	0.00760415	0.800877	no
comp13993_c0	comp13993_c0_seq1,comp13993_c0_seq2	700	523.82	-	-	-	-	-	-	28.98	33	39	12	9.99	16.6	1.81	1.87	1.68	0.75	1.14	0.96	33.66	12.8633	1.78667	0.95	0.911271	0.911271	0.00744242	0.800877	no
comp7525_c0	comp7525_c0_seq1,comp7525_c0_seq2	2209	2157.65	Q9FKT4	-	GO:0005634(nucleus);GO:0003723(RNA binding)	[A] RNA processing and modification	-	-	963.95	999.9	1436.52	770.68	482.45	1149.24	12.1	11	12.91	9.99	9.46	9.9	1133.46	800.79	12.0033	9.78333	0.295037	0.295037	0.0473282	0.800877	no
comp15849_c0	comp15849_c0_seq1,comp15849_c0_seq10,comp15849_c0_seq11,comp15849_c0_seq12,comp15849_c0_seq2,comp15849_c0_seq3,comp15849_c0_seq4,comp15849_c0_seq5,comp15849_c0_seq6,comp15849_c0_seq7,comp15849_c0_seq8,comp15849_c0_seq9	2576	1017.81	-	-	-	-	-	-	385.88	347.55	734.23	628.49	417.01	830.64	10.96	8.03	12.57	15.06	17.94	14.61	489.22	625.38	10.52	15.87	-0.593167	0.593167	0.0366615	0.800877	no
comp9804_c0	comp9804_c0_seq1,comp9804_c0_seq2	3908	3857.2	Q6A332	-	GO:0005634(nucleus);GO:0003677(DNA binding);GO:0005515(protein binding);GO:0006355(regulation of transcription, DNA-dependent)	[B] Chromatin structure and dynamics ;[D] Cell cycle control, cell division, chromosome partitioning ;[T] Signal transduction mechanisms	-	-	2311.4	2403.45	2875.37	1618.25	1218.01	2500.14	16.01	14.6	14.2	11.39	13.19	11.91	2530.07	1778.8	14.9367	12.1633	0.29632	0.29632	0.0224112	0.800877	no
comp6539_c0	comp6539_c0_seq1,comp6539_c0_seq2	419	315.8	-	-	-	-	-	-	19	17	24	14	8	24.99	2.35	1.92	2.08	1.7	1.26	1.66	20	15.6633	2.11667	1.54	0.458864	0.458864	0.0382288	0.800877	no
comp55295_c0	comp55295_c0_seq1	345	345	-	-	-	-	-	-	25.01	24.41	36	15	11	14	2.43	2.07	2.48	1.48	1.67	0.94	28.4733	13.3333	2.32667	1.36333	0.771126	0.771126	0.0280216	0.800877	no
comp302892_c0	comp302892_c0_seq1	669	669	-	-	-	-	-	-	21	20	29	9	5	21	0.93	0.77	0.91	0.4	0.34	0.64	23.3333	11.6667	0.87	0.46	0.919382	0.919382	0.0276979	0.800877	no
comp4548_c1	comp4548_c1_seq1,comp4548_c1_seq2	2867	2826.74	Q9SIS3	myosin heavy chain	GO:0005874(microtubule);GO:0005739(mitochondrion);GO:0005634(nucleus);GO:0009524(phragmoplast);GO:0009536(plastid);GO:0009574(preprophase band);GO:0008017(microtubule binding);GO:0051301(cell division);GO:0007067(mitosis)	[D] Cell cycle control, cell division, chromosome partitioning ;[Z] Cytoskeleton	K10352	ko04530(Tight junction);ko05416(Viral myocarditis)	11151.4	10358.8	13406.9	4279.98	4710.17	8238.9	106.62	86.68	91.12	41.58	70.31	54.22	11639	5743.02	94.8067	55.37	0.775884	0.775884	0.0218922	0.800877	no
comp15726_c0	comp15726_c0_seq1,comp15726_c0_seq10,comp15726_c0_seq11,comp15726_c0_seq12,comp15726_c0_seq13,comp15726_c0_seq2,comp15726_c0_seq3,comp15726_c0_seq4,comp15726_c0_seq5,comp15726_c0_seq6,comp15726_c0_seq7,comp15726_c0_seq8,comp15726_c0_seq9	8972	4826.53	-	-	-	[R] General function prediction only	-	-	3052.49	4139.94	4033.07	2405.24	1880.83	4573.53	18.96	18.06	15.69	12.74	14.15	14.62	3741.83	2953.2	17.57	13.8367	0.344618	0.344618	0.0410968	0.800877	no
comp225920_c0	comp225920_c0_seq1	475	475	-	-	-	-	-	-	8	11	11	11	8	17	0.52	0.63	0.51	0.73	0.82	0.77	10	12	0.553333	0.773333	-0.482942	0.482942	0.0123491	0.800877	no
comp86256_c0	comp86256_c0_seq1	641	641	-	-	-	-	-	-	36	37	35	13	10	31	1.67	1.5	1.15	0.61	0.72	0.99	36	18	1.44	0.773333	0.896907	0.896907	0.0283931	0.800877	no
comp10756_c0	comp10756_c0_seq1	1743	1743	-	-	-	-	-	-	110.98	56	174.97	208	122	213.11	1.75	0.77	1.96	3.34	3	2.31	113.983	181.037	1.49333	2.88333	-0.949201	0.949201	0.04504	0.800877	no
comp3094_c0	comp3094_c0_seq1	277	277	-	-	-	-	-	-	79.9	98	115	58	42	85	10.35	11.11	10.59	7.65	8.49	7.58	97.6333	61.6667	10.6833	7.90667	0.43422	0.43422	0.00214316	0.800877	no
comp1874_c0	comp1874_c0_seq1	691	691	-	-	-	-	-	-	8	4	8	12	6	17	0.34	0.15	0.24	0.52	0.4	0.5	6.66667	11.6667	0.243333	0.473333	-0.959923	0.959923	0.0314278	0.800877	no
comp11127_c2	comp11127_c2_seq1	2096	2096	-	-	-	-	-	-	5326	5107.56	7857.16	6308.05	3807.51	9693.03	69.25	58.11	72.62	83.49	77.27	86.82	6096.91	6602.86	66.66	82.5267	-0.308039	0.308039	0.047087	0.800877	no
comp6314_c0	comp6314_c0_seq1,comp6314_c0_seq2	1252	1051.15	Q9ZT46	-	GO:0003723(RNA binding);GO:0006810(transport)	[R] General function prediction only	-	-	235.05	284.87	318.67	122	116.09	204.15	6.14	6.4	6.08	3.41	5.01	3.84	279.53	147.413	6.20667	4.08667	0.602894	0.602894	0.0424046	0.800877	no
comp11967_c3	comp11967_c3_seq1	290	290	Q84VW9	phosphoenolpyruvate carboxylase	GO:0005829(cytosol);GO:0008964(phosphoenolpyruvate carboxylase activity);GO:0015977(carbon fixation);GO:0015979(photosynthesis);GO:0006099(tricarboxylic acid cycle)	-	K01595	ko00620(Pyruvate metabolism);ko00710(Carbon fixation in photosynthetic organisms);ko00720(Reductive carboxylate cycle (CO2 fixation))	178.59	216.85	274.99	291	190.98	376	21.74	23.09	23.79	36.06	36.28	31.53	223.477	285.993	22.8733	34.6233	-0.598078	0.598078	0.00924921	0.800877	no
comp88476_c0	comp88476_c0_seq1	230	230	-	-	-	-	-	-	21	19	22	13	7	11	3.54	2.8	2.64	2.23	1.84	1.28	20.6667	10.3333	2.99333	1.78333	0.747177	0.747177	0.0364027	0.800877	no
comp274270_c0	comp274270_c0_seq1	406	406	-	-	-	-	-	-	7	11	11	3	4	7	0.55	0.76	0.62	0.24	0.49	0.38	9.66667	4.66667	0.643333	0.37	0.798041	0.798041	0.046616	0.800877	no
comp20836_c0	comp20836_c0_seq1	1791	1791	Q96255	phosphoserine aminotransferase	GO:0009570(chloroplast stroma);GO:0004648(O-phospho-L-serine:2-oxoglutarate aminotransferase activity);GO:0030170(pyridoxal phosphate binding);GO:0006564(L-serine biosynthetic process)	[H] Coenzyme transport and metabolism ;[E] Amino acid transport and metabolism	K00831	ko00260(Glycine, serine and threonine metabolism);ko00750(Vitamin B6 metabolism)	1333.64	1272.24	2202.72	2239.41	1091	3188.59	20.42	17.05	23.97	34.91	26.08	33.63	1602.87	2173	20.48	31.54	-0.622967	0.622967	0.0358598	0.800877	no
comp320925_c0	comp320925_c0_seq1	365	365	-	-	-	-	-	-	7	11	11	5	3	6	0.63	0.87	0.71	0.46	0.42	0.37	9.66667	4.66667	0.736667	0.416667	0.822118	0.822118	0.0330708	0.800877	no
comp26060_c0	comp26060_c0_seq1	333	333	-	-	-	-	-	-	189.73	169.91	229.97	91	79.77	173	19.26	15.09	16.59	9.4	12.64	12.1	196.537	114.59	16.98	11.38	0.577336	0.577336	0.0253474	0.800877	no
comp2260_c0	comp2260_c0_seq1	505	505	-	-	-	-	-	-	16	15	24	8	7	13	0.98	0.8	1.04	0.5	0.67	0.55	18.3333	9.33333	0.94	0.573333	0.713287	0.713287	0.0176899	0.800877	no
comp440131_c0	comp440131_c0_seq1	501	501	-	-	-	[R] General function prediction only	-	-	9	12	11	15	9	18	0.55	0.65	0.48	0.94	0.86	0.76	10.6667	14	0.56	0.853333	-0.607683	0.607683	0.0150675	0.800877	no
comp264_c0	comp264_c0_seq1	278	278	-	-	-	-	-	-	19	21	28	9	6	19	2.45	2.37	2.56	1.18	1.21	1.69	22.6667	11.3333	2.46	1.36	0.855052	0.855052	0.0144685	0.800877	no
comp12544_c0	comp12544_c0_seq1	349	349	O22518	small subunit ribosomal protein SAe	GO:0015935(small ribosomal subunit);GO:0003735(structural constituent of ribosome);GO:0006412(translation)	[J] Translation, ribosomal structure and biogenesis	K02998	ko03010(Ribosome)	515.75	470.02	652.37	680.69	379.04	966.22	49.31	39.32	44.33	66.24	56.56	63.64	546.047	675.317	44.32	62.1467	-0.487719	0.487719	0.0120198	0.800877	no
comp9596_c1	comp9596_c1_seq1	414	414	-	-	-	-	-	-	27	21	32	13	7	21	2.09	1.42	1.76	1.02	0.84	1.12	26.6667	13.6667	1.75667	0.993333	0.822491	0.822491	0.0427599	0.800877	no
comp15905_c0	comp15905_c0_seq1,comp15905_c0_seq10,comp15905_c0_seq11,comp15905_c0_seq12,comp15905_c0_seq13,comp15905_c0_seq14,comp15905_c0_seq15,comp15905_c0_seq16,comp15905_c0_seq17,comp15905_c0_seq18,comp15905_c0_seq19,comp15905_c0_seq2,comp15905_c0_seq20,comp15905_	2985	1629.62	Q9LJ69	-	GO:0005739(mitochondrion);GO:0080156(mitochondrial mRNA modification)	[R] General function prediction only	-	-	1000.8	836.92	1222.48	644.22	343	726.63	16.86	11.49	14.5	9.25	8.03	6.02	1020.07	571.283	14.2833	7.76667	0.878965	0.878965	0.0318467	0.800877	no
comp13739_c0	comp13739_c0_seq1,comp13739_c0_seq2,comp13739_c0_seq3	4036	2051.85	Q9FKR3	-	GO:0005488(binding)	[R] General function prediction only	-	-	707	662.78	816.15	404.12	312.11	669.41	8.64	6.24	7.02	4.09	4.53	5.43	728.643	461.88	7.3	4.68333	0.640361	0.640361	0.0452005	0.800877	no
comp1199_c1	comp1199_c1_seq1	719	719	-	-	-	-	-	-	5	7	8	9	5	14.65	0.2	0.25	0.23	0.37	0.32	0.41	6.66667	9.55	0.226667	0.366667	-0.693897	0.693897	0.0165354	0.800877	no
comp47551_c0	comp47551_c0_seq1	1470	1470	-	-	-	-	-	-	99	75	118	35	28	67	1.86	1.24	1.58	0.67	0.82	0.87	97.3333	43.3333	1.56	0.786667	0.987722	0.987722	0.0386657	0.800877	no
comp141497_c0	comp141497_c0_seq1	820	820	-	-	-	-	-	-	33	41.99	44	21	7	31	1.16	1.29	1.1	0.75	0.39	0.75	39.6633	19.6667	1.18333	0.63	0.909433	0.909433	0.0279132	0.800877	no
comp22619_c0	comp22619_c0_seq1	522	522	-	-	-	-	-	-	67	65	83	36.99	20	36	3.93	3.34	3.46	2.21	1.83	1.46	71.6667	30.9967	3.57667	1.83333	0.964147	0.964147	0.00385266	0.800877	no
comp14964_c1	comp14964_c1_seq1,comp14964_c1_seq2,comp14964_c1_seq3,comp14964_c1_seq4,comp14964_c1_seq5,comp14964_c1_seq6	767	686.54	Q9M339	small subunit ribosomal protein S3e	GO:0022627(cytosolic small ribosomal subunit);GO:0016020(membrane);GO:0009506(plasmodesma);GO:0003723(RNA binding);GO:0003735(structural constituent of ribosome);GO:0009651(response to salt stress);GO:0006412(translation)	[J] Translation, ribosomal structure and biogenesis	K02985	ko03010(Ribosome)	283.89	264	357.98	183	109.75	304.99	12.16	10.07	10.57	8.05	7.27	9.3	301.957	199.247	10.9333	8.20667	0.413865	0.413865	0.0345166	0.800877	no
comp19865_c0	comp19865_c0_seq1	2492	2492	P09114	acetolactate synthase I/II/III large subunit	GO:0009507(chloroplast);GO:0003984(acetolactate synthase activity);GO:0050660(flavin adenine dinucleotide binding);GO:0000287(magnesium ion binding);GO:0030976(thiamine pyrophosphate binding);GO:0009082(branched chain family amino acid biosynthetic proces	[E] Amino acid transport and metabolism ;[H] Coenzyme transport and metabolism	K01652	ko00290(Valine, leucine and isoleucine biosynthesis);ko00650(Butanoate metabolism);ko00660(C5-Branched dibasic acid metabolism);ko00770(Pantothenate and CoA biosynthesis)	2641.09	2984.43	5437.81	4942.95	2523.4	7959.12	28.72	28.39	42.03	54.71	42.83	59.62	3687.78	5141.82	33.0467	52.3867	-0.664695	0.664695	0.0454875	0.800877	no
comp7834_c0	comp7834_c0_seq1,comp7834_c0_seq2	1629	1238.56	P46423	glutathione S-transferase	GO:0004364(glutathione transferase activity);GO:0009734(auxin mediated signaling pathway)	[O] Posttranslational modification, protein turnover, chaperones	K00799	ko00480(Glutathione metabolism);ko00980(Metabolism of xenobiotics by cytochrome P450);ko00982(Drug metabolism - cytochrome P450)	186	174	277	305	189	376.2	4.13	3.64	4.56	7.09	6.69	5.58	212.333	290.067	4.11	6.45333	-0.650906	0.650906	0.0177175	0.800877	no
comp17092_c0	comp17092_c0_seq1	1934	1934	Q07346	glutamate decarboxylase	GO:0005516(calmodulin binding);GO:0004351(glutamate decarboxylase activity);GO:0030170(pyridoxal phosphate binding);GO:0006536(glutamate metabolic process)	[E] Amino acid transport and metabolism	K01580	ko00250(Alanine, aspartate and glutamate metabolism);ko00410(beta-Alanine metabolism);ko00430(Taurine and hypotaurine metabolism);ko00650(Butanoate metabolism);ko04940(Type I diabetes mellitus)	58526	73303.4	90394.8	31510.7	28959	66939.6	827.25	906.61	908.22	453.4	638.92	651.81	74074.7	42469.8	880.693	581.377	0.599167	0.599167	0.0289137	0.800877	no
comp16850_c0	comp16850_c0_seq1,comp16850_c0_seq10,comp16850_c0_seq2,comp16850_c0_seq3,comp16850_c0_seq4,comp16850_c0_seq5,comp16850_c0_seq6,comp16850_c0_seq7,comp16850_c0_seq8,comp16850_c0_seq9	2662	1649.58	-	-	-	-	-	-	750.98	716.65	759.1	350.15	244.39	550.02	12.23	10.54	9.26	7.18	6.03	6.22	742.243	381.52	10.6767	6.47667	0.721138	0.721138	0.0260729	0.800877	no
comp13295_c0	comp13295_c0_seq1,comp13295_c0_seq2,comp13295_c0_seq3,comp13295_c0_seq4,comp13295_c0_seq5,comp13295_c0_seq6	4783	2945.65	Q02224	kinesin family member 15	GO:0000777(condensed chromosome kinetochore);GO:0005829(cytosol);GO:0005874(microtubule);GO:0005634(nucleus);GO:0005819(spindle);GO:0005524(ATP binding);GO:0043515(kinetochore binding);GO:0003777(microtubule motor activity);GO:0005515(protein binding);GO:	[S] Function unknown	K10400	-	16373.2	20409.7	16792.3	5168.16	6631.2	10668.7	153.03	166.41	113.82	48.47	98.71	72.15	17858.4	7489.36	144.42	73.11	0.98213	0.98213	0.0295123	0.800877	no
comp7550_c0	comp7550_c0_seq1	635	635	-	-	-	-	-	-	37	44	58.03	23	18	27	1.73	1.8	1.93	1.1	1.32	0.87	46.3433	22.6667	1.82	1.09667	0.730813	0.730813	0.0177026	0.800877	no
comp337411_c0	comp337411_c0_seq1	764	764	-	-	-	-	-	-	21	24	27	10	7	22	0.8	0.8	0.73	0.39	0.42	0.58	24	13	0.776667	0.463333	0.745245	0.745245	0.0218867	0.800877	no
comp245932_c0	comp245932_c0_seq1	599	599	-	-	-	-	-	-	10	19	21	21	15	27	0.5	0.83	0.75	1.07	1.17	0.93	16.6667	21	0.693333	1.05667	-0.607899	0.607899	0.0462359	0.800877	no
comp3570_c0	comp3570_c0_seq1	3248	3248	-	-	-	-	-	-	639.03	726.47	910.99	542.23	301.88	727.52	5.29	5.27	5.36	4.57	3.9	4.15	758.83	523.877	5.30667	4.20667	0.335128	0.335128	0.0281888	0.800877	no
comp824_c0	comp824_c0_seq1	374	374	-	-	-	-	-	-	3	4	4	5	3	7	0.26	0.31	0.25	0.45	0.41	0.42	3.66667	5	0.273333	0.426667	-0.642448	0.642448	0.00394378	0.800877	no
comp12602_c0	comp12602_c0_seq1	828	828	-	-	-	-	-	-	23	24	34	15.07	10	27	0.8	0.73	0.84	0.53	0.54	0.65	27	17.3567	0.79	0.573333	0.462478	0.462478	0.0132734	0.800877	no
comp8333_c0	comp8333_c0_seq1	2805	2805	Q9SW11	interleukin-1 receptor-associated kinase 4	GO:0000151(ubiquitin ligase complex);GO:0005524(ATP binding);GO:0005515(protein binding);GO:0004674(protein serine/threonine kinase activity);GO:0004842(ubiquitin-protein ligase activity);GO:0006950(response to stress)	-	K04733	ko04210(Apoptosis);ko04620(Toll-like receptor signaling pathway);ko04722(Neurotrophin signaling pathway);ko05140(Leishmaniasis);ko05142(Chagas disease)	3097.33	2926.4	3042.14	1276.52	1156.81	2653.53	29.82	24.65	20.82	12.51	17.38	17.6	3021.96	1695.62	25.0967	15.83	0.664835	0.664835	0.0494024	0.800877	no
comp9256_c0	comp9256_c0_seq1,comp9256_c0_seq2,comp9256_c0_seq3	1692	1454.59	Q9LME2	enhancer of polycomb-like protein	GO:0000795(synaptonemal complex);GO:0051301(cell division);GO:0007131(reciprocal meiotic recombination);GO:0007129(synapsis)	-	K11322	-	122	102.3	93.25	47	35	67	2.06	1.73	1.41	0.8	1.06	0.83	105.85	49.6667	1.73333	0.896667	0.950905	0.950905	0.0314713	0.800877	no
comp8567_c1	comp8567_c1_seq1	295	295	-	-	-	-	-	-	2	2	4	4	3	6	0.24	0.21	0.34	0.48	0.56	0.49	2.66667	4.33333	0.263333	0.51	-0.953607	0.953607	0.00952709	0.800877	no
comp28_c0	comp28_c0_seq1,comp28_c0_seq2	637	586.7	-	-	-	-	-	-	21	22	22	11	10	13	1.08	1.06	0.82	0.52	0.8	0.53	21.6667	11.3333	0.986667	0.616667	0.678072	0.678072	0.0410796	0.800877	no
comp9686_c0	comp9686_c0_seq1	628	628	-	-	-	-	-	-	369.99	485.73	642.98	232	189	322	17.56	20.17	21.69	11.21	14	10.53	499.567	247.667	19.8067	11.9133	0.733409	0.733409	0.0083024	0.800877	no
comp17640_c0	comp17640_c0_seq1	1287	1287	-	-	-	-	-	-	5182.21	4651.34	5823.96	3260.97	1608.94	4076.71	112.32	88.21	89.73	71.95	54.43	60.87	5219.17	2982.21	96.7533	62.4167	0.63238	0.63238	0.0273161	0.800877	no
comp9909_c0	comp9909_c0_seq1,comp9909_c0_seq2,comp9909_c0_seq3	4171	1859.53	-	-	-	-	-	-	2925.43	3297.54	3442.25	1610.7	1245.01	3391.9	40.94	36.98	33.31	21.08	25.15	28.36	3221.74	2082.54	37.0767	24.8633	0.576492	0.576492	0.0161018	0.800877	no
comp7557_c0	comp7557_c0_seq1	3966	3966	Q9FJE6	-	GO:0005488(binding)	[R] General function prediction only	-	-	573	644.55	652.65	313	292	522.03	3.87	3.81	3.13	2.15	3.08	2.43	623.4	375.677	3.60333	2.55333	0.49695	0.49695	0.0458296	0.800877	no
comp10746_c0	comp10746_c0_seq1,comp10746_c0_seq2	454	430.41	-	-	-	-	-	-	42	36	44	12	15	32	3.17	2.31	2.29	0.85	1.67	1.67	40.6667	19.6667	2.59	1.39667	0.890964	0.890964	0.0403525	0.800877	no
comp86880_c0	comp86880_c0_seq1	335	335	-	-	-	-	-	-	19.01	22	27.98	12.04	7	19.4	1.91	1.94	2	1.23	1.1	1.35	22.9967	12.8133	1.95	1.22667	0.668731	0.668731	0.00495153	0.800877	no
comp15890_c1	comp15890_c1_seq1,comp15890_c1_seq2,comp15890_c1_seq3,comp15890_c1_seq4,comp15890_c1_seq5,comp15890_c1_seq6,comp15890_c1_seq7	1341	1159.11	-	-	-	-	-	-	174.74	158.91	204.04	77	76	122	4.17	3.4	3.38	1.91	2.84	1.97	179.23	91.6667	3.65	2.24	0.704398	0.704398	0.0246616	0.800877	no
comp9865_c0	comp9865_c0_seq1,comp9865_c0_seq2,comp9865_c0_seq3,comp9865_c0_seq4	3160	3073.25	-	-	-	-	-	-	1574.72	1492.13	1995.96	1023.64	799.99	1679.44	13.81	11.46	12.42	9.1	10.97	10.14	1687.6	1167.69	12.5633	10.07	0.319156	0.319156	0.0485744	0.800877	no
comp17031_c0	comp17031_c0_seq1	1365	1365	P59169	histone H3	GO:0000786(nucleosome);GO:0005634(nucleus);GO:0003677(DNA binding);GO:0006334(nucleosome assembly)	[B] Chromatin structure and dynamics	K11253	ko05322(Systemic lupus erythematosus)	25843	26555.5	33339.9	16035.6	12043.7	27195.3	526.28	473.19	482.61	332.43	382.83	381.52	28579.5	18424.9	494.027	365.593	0.434349	0.434349	0.00528306	0.800877	no
comp3641_c0	comp3641_c0_seq1	1954	1954	-	-	-	-	-	-	545	505.42	886.05	889.98	444.06	1197.28	7.62	6.18	8.81	12.67	9.69	11.53	645.49	843.773	7.53667	11.2967	-0.583899	0.583899	0.0319264	0.800877	no
comp14844_c0	comp14844_c0_seq1,comp14844_c0_seq2,comp14844_c0_seq3,comp14844_c0_seq4,comp14844_c0_seq5,comp14844_c0_seq6,comp14844_c0_seq7	1172	994.89	-	-	-	-	-	-	220.01	263.3	325.25	169	101	252.11	6.5	6.9	6.66	5.15	4.72	5.25	269.52	174.037	6.68667	5.04	0.407863	0.407863	0.00179724	0.800877	no
comp13885_c0	comp13885_c0_seq1,comp13885_c0_seq2	1196	828.63	-	-	-	-	-	-	49	81	83	33	23	71.85	1.59	1.92	1.7	0.94	1.03	1.3	71	42.6167	1.73667	1.09	0.671993	0.671993	0.0115425	0.800877	no
comp64329_c0	comp64329_c0_seq1	307	307	-	-	-	-	-	-	12.04	17	15	7	4	8	1.36	1.68	1.2	0.8	0.7	0.62	14.68	6.33333	1.41333	0.706667	1	1	0.0263039	0.800877	no
comp16301_c0	comp16301_c0_seq1,comp16301_c0_seq2,comp16301_c0_seq3	987	939.09	Q8LGU7	-	GO:0005634(nucleus);GO:0042781(3'-tRNA processing endoribonuclease activity);GO:0046872(metal ion binding);GO:0042780(tRNA 3'-end processing)	-	-	-	182	222.99	257.97	232	133	340.99	5.81	6.05	6.03	7.08	6.49	7.37	220.987	235.33	5.96333	6.98	-0.227108	0.227108	0.0494197	0.800877	no
comp24601_c0	comp24601_c0_seq1	2141	2141	Q9SRE5	-	GO:0005886(plasma membrane)	-	-	-	1711.76	1610.04	2196.41	888.12	536.06	1716.01	21.77	17.92	19.86	11.5	10.64	15.04	1839.4	1046.73	19.85	12.3933	0.679575	0.679575	0.013956	0.800877	no
comp9249_c0	comp9249_c0_seq1,comp9249_c0_seq2,comp9249_c0_seq3	1302	1234.5	-	-	-	-	-	-	281.67	359.02	461.72	392.08	232	512	6.3	7.13	7.44	9.08	8.26	8	367.47	378.693	6.95667	8.44667	-0.279986	0.279986	0.0341369	0.800877	no
comp349648_c0	comp349648_c0_seq1	533	533	-	-	-	-	-	-	4	3	7.78	9	5	10	0.23	0.15	0.32	0.52	0.45	0.39	4.92667	8	0.233333	0.453333	-0.95818	0.95818	0.0263659	0.800877	no
comp46529_c0	comp46529_c0_seq1	385	385	-	-	-	-	-	-	30	23	34.99	8	11	18	2.54	1.7	2.1	0.69	1.45	1.05	29.33	12.3333	2.11333	1.06333	0.990926	0.990926	0.033063	0.800877	no
comp13904_c0	comp13904_c0_seq1,comp13904_c0_seq2,comp13904_c0_seq3,comp13904_c0_seq4	855	663.19	-	-	-	-	-	-	50	73.94	86	40	23.14	76.01	2.52	2.94	2.81	1.76	1.71	2.26	69.98	46.3833	2.75667	1.91	0.529352	0.529352	0.0207966	0.800877	no
comp16305_c0	comp16305_c0_seq1,comp16305_c0_seq2,comp16305_c0_seq3,comp16305_c0_seq4,comp16305_c0_seq5	4564	2390.97	Q2QQS5	-	GO:0005634(nucleus);GO:0019901(protein kinase binding);GO:0007049(cell cycle);GO:0051301(cell division);GO:0000079(regulation of cyclin-dependent protein kinase activity);GO:0006355(regulation of transcription, DNA-dependent)	[D] Cell cycle control, cell division, chromosome partitioning	-	-	674.76	694.37	796.02	480	298.01	630.04	8.82	7.95	7.5	6.07	5.9	5.51	721.717	469.35	8.09	5.82667	0.473469	0.473469	0.0163406	0.800877	no
comp535040_c0	comp535040_c0_seq1	337	337	-	-	-	-	-	-	7	12	12.61	5	3	6	0.7	1.05	0.9	0.51	0.47	0.41	10.5367	4.66667	0.883333	0.463333	0.930907	0.930907	0.0446716	0.800877	no
comp11125_c0	comp11125_c0_seq1,comp11125_c0_seq2,comp11125_c0_seq3	2314	1632.11	Q9LV48	DNA (cytosine-5-)-methyltransferase	GO:0016021(integral to membrane);GO:0005886(plasma membrane);GO:0005524(ATP binding);GO:0004674(protein serine/threonine kinase activity);GO:0046777(protein autophosphorylation)	[T] Signal transduction mechanisms	K00558	ko00270(Cysteine and methionine metabolism)	6120.58	8131.26	9321	4382.79	3538.21	8193.2	109.47	129.7	111.8	66.56	97.09	86.1	7857.61	5371.4	116.99	83.25	0.490863	0.490863	0.0424002	0.800877	no
comp11513_c0	comp11513_c0_seq1	525	525	Q2QD30	-	GO:0009570(chloroplast stroma);GO:0005524(ATP binding);GO:0017111(nucleoside-triphosphatase activity)	-	-	-	6	14	14	17	13.77	22	0.35	0.71	0.58	1.01	1.25	0.88	11.3333	17.59	0.546667	1.04667	-0.937069	0.937069	0.0297001	0.800877	no
comp107323_c0	comp107323_c0_seq1	686	686	-	-	-	-	-	-	42	42	54.19	30	17	44	1.8	1.58	1.65	1.31	1.14	1.3	46.0633	30.3333	1.67667	1.25	0.423668	0.423668	0.00794648	0.800877	no
comp20653_c0	comp20653_c0_seq1	508	508	Q7FAH2	glyceraldehyde 3-phosphate dehydrogenase	-	[G] Carbohydrate transport and metabolism	K00134	ko00010(Glycolysis / Gluconeogenesis);ko05010(Alzheimer's disease)	149.52	129.1	236.06	189	180.29	362.01	9.06	6.84	10.16	11.65	17.05	15.11	171.56	243.767	8.68667	14.6033	-0.749423	0.749423	0.0430326	0.800877	no
comp20576_c0	comp20576_c0_seq1	3117	3117	P30924	1,4-alpha-glucan branching enzyme	GO:0009501(amyloplast);GO:0009507(chloroplast);GO:0003844(1,4-alpha-glucan branching enzyme activity);GO:0043169(cation binding);GO:0004553(hydrolase activity, hydrolyzing O-glycosyl compounds);GO:0005978(glycogen biosynthetic process);GO:0019252(starch b	[G] Carbohydrate transport and metabolism	K00700	ko00500(Starch and sucrose metabolism)	2334.38	1856.52	4463.04	4347.27	2422.18	6406.28	20.17	14.03	27.41	38.23	32.66	38.13	2884.65	4391.91	20.5367	36.34	-0.823356	0.823356	0.0373488	0.800877	no
comp19511_c0	comp19511_c0_seq1	1358	1358	P53763	urate oxidase	GO:0005777(peroxisome);GO:0004846(urate oxidase activity);GO:0009877(nodulation);GO:0006144(purine base metabolic process)	[Q] Secondary metabolites biosynthesis, transport and catabolism	K00365	ko00230(Purine metabolism);ko00232(Caffeine metabolism)	3052.44	2635.89	3558.5	1203.64	1230.84	2481.92	62.5	47.23	51.79	25.09	39.34	35.01	3082.28	1638.8	53.84	33.1467	0.699815	0.699815	0.0289186	0.800877	no
comp114118_c0	comp114118_c0_seq1	1238	1238	-	-	-	-	-	-	52	62	53	27	23	32	1.17	1.23	0.85	0.62	0.81	0.5	55.6667	27.3333	1.08333	0.643333	0.751839	0.751839	0.0450182	0.800877	no
comp131538_c0	comp131538_c0_seq1	875	875	-	-	-	-	-	-	17	22	26	26.22	14	34	0.56	0.63	0.61	0.88	0.72	0.77	21.6667	24.74	0.6	0.79	-0.39689	0.39689	0.0402362	0.800877	no
comp409852_c0	comp409852_c0_seq1	206	206	-	-	-	-	-	-	4	4	6	2	2	3	0.8	0.7	0.85	0.41	0.62	0.41	4.66667	2.33333	0.783333	0.48	0.706592	0.706592	0.028814	0.800877	no
comp150466_c0	comp150466_c0_seq1	2826	2826	-	-	-	-	-	-	97	97	132	77	43	117.2	0.93	0.81	0.9	0.75	0.64	0.77	108.667	79.0667	0.88	0.72	0.289507	0.289507	0.0424676	0.800877	no
comp48793_c0	comp48793_c0_seq1	282	282	-	-	-	-	-	-	49.97	49	81	29.49	22	43.03	6.32	5.42	7.28	3.79	4.34	3.75	59.99	31.5067	6.34	3.96	0.678982	0.678982	0.0355361	0.800877	no
comp96779_c0	comp96779_c0_seq1	1536	1536	-	-	-	-	-	-	40	50	42	59	33	70.32	0.72	0.79	0.54	1.08	0.93	0.87	44	54.1067	0.683333	0.96	-0.490445	0.490445	0.0481987	0.800877	no
comp14144_c0	comp14144_c0_seq1,comp14144_c0_seq2,comp14144_c0_seq3	316	273.95	Q9SUE3	EREBP-like factor	GO:0005737(cytoplasm);GO:0005634(nucleus);GO:0003677(DNA binding);GO:0005515(protein binding);GO:0003700(sequence-specific DNA binding transcription factor activity);GO:0009736(cytokinin mediated signaling pathway);GO:0009873(ethylene mediated signaling p	-	K09286	-	17.92	27	28	10	7.98	14	2.34	3.09	2.5	1.33	1.6	1.21	24.3067	10.66	2.64333	1.38	0.93769	0.93769	0.0163886	0.800877	no
comp15728_c0	comp15728_c0_seq1,comp15728_c0_seq2,comp15728_c0_seq3	454	397.31	-	-	-	-	-	-	22	27.07	29	16	5	19	1.69	2.08	1.74	1.14	0.56	1.14	26.0233	13.3333	1.83667	0.946667	0.956161	0.956161	0.0242258	0.800877	no
comp20349_c0	comp20349_c0_seq1	2015	2015	-	-	-	-	-	-	1253.99	1341.34	1606.84	937.73	651.91	1578.29	16.99	15.9	15.47	12.93	13.78	14.73	1400.72	1055.98	16.12	13.8133	0.22279	0.22279	0.0294795	0.800877	no
comp9800_c0	comp9800_c0_seq1	799	799	-	-	-	-	-	-	20	22	20	11	8	12	0.73	0.7	0.52	0.41	0.45	0.3	20.6667	10.3333	0.65	0.386667	0.749349	0.749349	0.0355031	0.800877	no
comp205693_c0	comp205693_c0_seq1	387	387	-	-	-	-	-	-	8.06	11	12	5	2	9	0.68	0.81	0.72	0.43	0.26	0.52	10.3533	5.33333	0.736667	0.403333	0.869039	0.869039	0.0306509	0.800877	no
comp13501_c0	comp13501_c0_seq1,comp13501_c0_seq2,comp13501_c0_seq3,comp13501_c0_seq4,comp13501_c0_seq5,comp13501_c0_seq6,comp13501_c0_seq7,comp13501_c0_seq8,comp13501_c0_seq9	1951	1561.75	-	-	-	-	-	-	1861.91	2265.64	2603.03	1142.49	871.38	2119.38	31.23	34.37	32.54	21.5	24.86	27.11	2243.53	1377.75	32.7133	24.49	0.417686	0.417686	0.0197611	0.800877	no
comp14768_c0	comp14768_c0_seq1,comp14768_c0_seq2,comp14768_c0_seq3	418	339.63	P10978	-	GO:0004190(aspartic-type endopeptidase activity);GO:0003677(DNA binding);GO:0004519(endonuclease activity);GO:0003964(RNA-directed DNA polymerase activity);GO:0008270(zinc ion binding);GO:0015074(DNA integration)	[R] General function prediction only	-	-	22.99	27	32	16.98	12	26	2.02	2.35	2.08	1.63	1.63	1.72	27.33	18.3267	2.15	1.66	0.373153	0.373153	0.0318716	0.800877	no
comp20958_c0	comp20958_c0_seq1	3446	3446	O23702	D-lactate dehydrogenase	GO:0005829(cytosol);GO:0005874(microtubule);GO:0005634(nucleus);GO:0048037(cofactor binding);GO:0016616(oxidoreductase activity, acting on the CH-OH group of donors, NAD or NADP as acceptor);GO:0042803(protein homodimerization activity);GO:0048444(floral	[K] Transcription	K03778	ko00620(Pyruvate metabolism)	1760.97	1849.05	2384.41	1928.7	1174.84	2814.05	13.73	12.61	13.21	15.31	14.3	15.11	1998.14	1972.53	13.1833	14.9067	-0.177242	0.177242	0.0183314	0.800877	no
comp5970_c0	comp5970_c0_seq1,comp5970_c0_seq2	2100	2063.01	Q56X76	ATP-dependent RNA helicase RhlE	GO:0009507(chloroplast);GO:0005524(ATP binding);GO:0008026(ATP-dependent helicase activity);GO:0070180(LSU rRNA binding);GO:0080158(chloroplast ribulose bisphosphate carboxylase complex biogenesis)	[A] RNA processing and modification	K11927	ko03018(RNA degradation)	778.91	778.44	943.92	581.99	382	784.01	10.21	8.96	8.81	7.84	7.83	7.15	833.757	582.667	9.32667	7.60667	0.294097	0.294097	0.0412658	0.800877	no
comp6388_c0	comp6388_c0_seq1,comp6388_c0_seq2	2133	2084	Q9LFP7	-	GO:0016021(integral to membrane);GO:0005886(plasma membrane);GO:0005524(ATP binding);GO:0004674(protein serine/threonine kinase activity)	[T] Signal transduction mechanisms	K00924	-	2648.15	2403.32	3267.26	1556.84	1232.63	2602.98	34.51	27.6	30.61	21.37	25.45	23.57	2772.91	1797.48	30.9067	23.4633	0.39751	0.39751	0.0440921	0.800877	no
comp10199_c0	comp10199_c0_seq1,comp10199_c0_seq2	2608	2365.16	-	origin recognition complex subunit 5	-	[L] Replication, recombination and repair	K02607	ko04110(Cell cycle);ko04111(Cell cycle - yeast);ko04113(Meiosis - yeast)	220	212.97	251	140.02	77	244	2.36	1.96	1.99	1.71	1.36	1.74	227.99	153.673	2.10333	1.60333	0.391603	0.391603	0.0479507	0.800877	no
comp16526_c0	comp16526_c0_seq1,comp16526_c0_seq2,comp16526_c0_seq3,comp16526_c0_seq4,comp16526_c0_seq5,comp16526_c0_seq6,comp16526_c0_seq7,comp16526_c0_seq8,comp16526_c0_seq9	2644	2088.8	Q0WVN5	cellulose synthase A	GO:0000139(Golgi membrane);GO:0016021(integral to membrane);GO:0016760(cellulose synthase (UDP-forming) activity);GO:0007047(cellular cell wall organization);GO:0030244(cellulose biosynthetic process)	-	K10999	-	7387.21	6549.63	7372.18	1530.98	2450.69	5248.47	101.13	73.81	71.31	22.7	54.43	50.12	7103.01	3076.71	82.0833	42.4167	0.952458	0.952458	0.0451833	0.800877	no
comp149199_c0	comp149199_c0_seq1	285	285	-	-	-	-	-	-	18	18	20	11	3	13	2.24	1.96	1.77	1.4	0.58	1.12	18.6667	9	1.99	1.03333	0.945463	0.945463	0.0374315	0.800877	no
comp159717_c0	comp159717_c0_seq1	1299	1299	-	-	-	-	-	-	43	60	79	33.06	22	57	0.92	1.13	1.21	0.72	0.74	0.84	60.6667	37.3533	1.08667	0.766667	0.503238	0.503238	0.0493704	0.800877	no
comp7909_c0	comp7909_c0_seq1,comp7909_c0_seq2	1346	1151.18	-	cell cycle checkpoint protein	-	-	K02830	ko04111(Cell cycle - yeast);ko04113(Meiosis - yeast)	130.73	158	161	102	56	113	3.17	3.42	2.85	2.59	2.19	1.91	149.91	90.3333	3.14667	2.23	0.496781	0.496781	0.0247415	0.800877	no
comp3163_c0	comp3163_c0_seq1	727	727	-	-	-	-	-	-	88	81.94	127	61.51	30	68	3.54	2.89	3.63	2.52	1.89	1.89	98.98	53.17	3.35333	2.1	0.675207	0.675207	0.0165495	0.800877	no
comp30491_c0	comp30491_c0_seq1	238	238	Q9LTR2	-	GO:0009706(chloroplast inner membrane);GO:0016021(integral to membrane);GO:0005319(lipid transporter activity);GO:0005543(phospholipid binding);GO:0032365(intracellular lipid transport)	-	-	-	27	28.98	46.02	12	11	28.55	4.33	4.07	5.24	1.96	2.75	3.15	34	17.1833	4.54667	2.62	0.795242	0.795242	0.0180236	0.800877	no
comp9042_c0	comp9042_c0_seq1,comp9042_c0_seq2	1256	1167.66	-	-	-	-	-	-	75	95	131	30	33	93.92	2.44	2.12	2.4	0.84	1.15	1.65	100.333	52.3067	2.32	1.21333	0.935149	0.935149	0.0282342	0.800877	no
comp6867_c0	comp6867_c0_seq1	5023	5023	F4J5S1	translation initiation factor eIF-3 subunit P135	-	[R] General function prediction only	K03255	-	3541.64	4469.25	5331.5	4417.23	2740.52	6619.71	18.81	20.77	20.13	23.89	22.72	24.23	4447.46	4592.49	19.9033	23.6133	-0.246592	0.246592	0.00832735	0.800877	no
comp344294_c0	comp344294_c0_seq1	273	273	-	-	-	-	-	-	4	8	7	9	6	13	0.53	0.92	0.66	1.21	1.24	1.18	6.33333	9.33333	0.703333	1.21	-0.782727	0.782727	0.0448042	0.800877	no
comp11321_c0	comp11321_c0_seq1,comp11321_c0_seq2	981	954.28	-	-	-	-	-	-	23	23	21	13	9	19	0.67	0.62	0.51	0.38	0.41	0.38	22.3333	13.6667	0.6	0.39	0.621488	0.621488	0.0419679	0.800877	no
comp14228_c0	comp14228_c0_seq1,comp14228_c0_seq2,comp14228_c0_seq3	1770	1720.2	-	-	-	-	-	-	376.82	409.21	590.29	230.02	189	337	6.05	5.99	6.8	3.66	4.82	3.71	458.773	252.007	6.28	4.06333	0.628101	0.628101	0.0114339	0.800877	no
comp21401_c0	comp21401_c0_seq1	2682	2682	-	-	-	[S] Function unknown	-	-	1365	1368.77	1588.04	741.03	562.04	1248.53	13.76	12.07	11.38	7.6	8.84	8.67	1440.6	850.533	12.4033	8.37	0.567428	0.567428	0.0141623	0.800877	no
