# Supplementary material for: Genome-wide identification of new reference genes for RT-qPCR normalization in CGMMV-infected Lagenaria siceraria
Source: PeerJ. 2018 Oct 12;6:e5642. doi: 10.7717/peerj.5642 (PMC6188008; doi:10.7717/peerj.5642)
Supplement: Table S2 [file peerj-06-5642-s007.xls]

## Sheet: Sheet1
gene_ID	transcript_id(s)	length	effective_length	Name	Annotation	GO_Term	KOG_des	KEGG_KO	KEGG_Pathway	F1_FCG_count	F2_FCG_count	F3_FCG_count	F1_FCK_count	F2_FCK_count	F3_FCK_count	F1_FCG_rpkm	F2_FCG_rpkm	F3_FCG_rpkm	F1_FCK_rpkm	F2_FCK_rpkm	F3_FCK_rpkm	mean_count_FCG	mean_count_FCK	mean_rpkm_FCG	mean_rpkm_FCK	log2fold_change	ABS(log2fold_change)	pvalue	FDR	significant
comp16462_c0	comp16462_c0_seq1,comp16462_c0_seq10,comp16462_c0_seq11,comp16462_c0_seq2,comp16462_c0_seq3,comp16462_c0_seq4,comp16462_c0_seq5,comp16462_c0_seq6,comp16462_c0_seq7,comp16462_c0_seq8,comp16462_c0_seq9	2408	1937.8	A9LNK9	-	GO:0005634(nucleus);GO:0005516(calmodulin binding);GO:0003677(DNA binding);GO:0004519(endonuclease activity);GO:0003723(RNA binding);GO:0008270(zinc ion binding);GO:0006397(mRNA processing)	[T] Signal transduction mechanisms ;[A] RNA processing and modification	-	-	455.71	392.94	374.82	683.09	573.99	659.62	5.47	5.27	5.53	10.6	10.76	10.48	407.823	638.9	5.42333	10.6133	-0.968626	0.968626	1.35578e-06	0.00723021	no
comp11776_c0	comp11776_c0_seq1,comp11776_c0_seq2	3294	2739.63	O23144	-	-	-	-	-	4568.54	4192.77	3525.3	7223.38	6150.45	7268.2	39.11	40.42	38.52	75.03	75.65	76.45	4095.54	6880.68	39.35	75.71	-0.94412	0.94412	2.11848e-06	0.00924349	no
comp24179_c0	comp24179_c0_seq1	1551	1551	P22418	fructose-1,6-bisphosphatase I	GO:0009507(chloroplast);GO:0042132(fructose 1,6-bisphosphate 1-phosphatase activity);GO:0046872(metal ion binding);GO:0019253(reductive pentose-phosphate cycle)	[G] Carbohydrate transport and metabolism	K03841	ko00010(Glycolysis / Gluconeogenesis);ko00030(Pentose phosphate pathway);ko00051(Fructose and mannose metabolism);ko00710(Carbon fixation in photosynthetic organisms);ko04910(Insulin signaling pathway)	908.66	798.99	717.97	494.22	420.99	487.78	13.72	13.65	13.84	9.31	9.4	9.31	808.54	467.663	13.7367	9.34	0.556538	0.556538	5.0257e-06	0.0118975	no
comp17675_c0	comp17675_c0_seq1	4193	4193	O04379	argonaute	GO:0005829(cytosol);GO:0005634(nucleus);GO:0030529(ribonucleoprotein complex);GO:0004521(endoribonuclease activity);GO:0035198(miRNA binding);GO:0035197(siRNA binding);GO:0048830(adventitious root development);GO:0009850(auxin metabolic process);GO:000979	[J] Translation, ribosomal structure and biogenesis	K11596	-	7285.9	6226.22	5589.28	7897.28	6507.81	7775.79	39.46	38.14	38.64	53.37	52.13	53.21	6367.13	7393.63	38.7467	52.9033	-0.449286	0.449286	1.33009e-05	0.0166764	no
comp12475_c0	comp12475_c0_seq1,comp12475_c0_seq2	2870	2842.91	Q304B9	neutral ceramidase	GO:0005576(extracellular region);GO:0009506(plasmodesma);GO:0017040(ceramidase activity);GO:0006665(sphingolipid metabolic process)	[T] Signal transduction mechanisms	K12349	ko00600(Sphingolipid metabolism)	1414.67	1351.38	1154.79	2118.57	1809.2	2185.14	11.37	12.27	11.81	21.18	21.43	22.12	1306.95	2037.64	11.8167	21.5767	-0.868649	0.868649	1.48154e-05	0.0170441	no
comp11858_c0	comp11858_c0_seq1,comp11858_c0_seq2	2556	2551.57	Q9SKZ2	-	GO:0005737(cytoplasm);GO:0005634(nucleus);GO:0046872(metal ion binding);GO:0004535(poly(A)-specific ribonuclease activity);GO:0003723(RNA binding);GO:0006355(regulation of transcription, DNA-dependent);GO:0006351(transcription, DNA-dependent)	[A] RNA processing and modification	-	-	9249.69	8153.47	7436.93	4065.23	3686.49	4235.6	83.37	83.07	85.47	45.8	49.1	48.21	8280.03	3995.77	83.97	47.7033	0.815784	0.815784	1.47339e-05	0.0170441	no
comp20370_c0	comp20370_c0_seq1	3975	3975	Q9M390	proton-dependent oligopeptide transporter, POT family	GO:0016021(integral to membrane);GO:0005886(plasma membrane);GO:0009506(plasmodesma);GO:0042936(dipeptide transporter activity);GO:0042937(tripeptide transporter activity);GO:0006807(nitrogen compound metabolic process);GO:0015031(protein transport)	[E] Amino acid transport and metabolism	K03305	-	2571.8	2444.88	2229.91	4304.45	3640.58	4102.6	14.71	15.82	16.28	30.72	30.79	29.64	2415.53	4015.88	15.6033	30.3833	-0.961426	0.961426	2.34701e-05	0.0187473	no
comp9882_c0	comp9882_c0_seq1,comp9882_c0_seq2,comp9882_c0_seq3,comp9882_c0_seq4	2191	1739.11	-	-	-	-	-	-	600.79	547.51	493.99	961.11	814.47	960.71	8.38	8.83	8.88	15.62	15.72	16.33	547.43	912.097	8.69667	15.89	-0.869585	0.869585	2.83344e-05	0.018944	no
comp23381_c0	comp23381_c0_seq1	1383	1383	Q9SYU4	-	GO:0005829(cytosol);GO:0005778(peroxisomal membrane);GO:0005515(protein binding);GO:0008270(zinc ion binding);GO:0010381(attachment of peroxisome to chloroplast);GO:0009793(embryo development ending in seed dormancy);GO:0006635(fatty acid beta-oxidation);	[O] Posttranslational modification, protein turnover, chaperones	-	-	564.03	497.26	463	691.99	574.48	656	9.61	9.59	10.07	14.72	14.48	14.13	508.097	640.823	9.75667	14.4433	-0.565943	0.565943	3.77736e-05	0.0201996	no
comp22389_c0	comp22389_c0_seq1	5424	5424	Q42510	IQ motif and SEC7 domain-containing protein	GO:0005737(cytoplasm);GO:0005086(ARF guanyl-nucleotide exchange factor activity);GO:0010292(GTP:GDP antiporter activity);GO:0042803(protein homodimerization activity);GO:0010540(basipetal auxin transport);GO:0007155(cell adhesion);GO:0007047(cellular cell	[U] Intracellular trafficking, secretion, and vesicular transport	K12495	ko04144(Endocytosis)	1901.26	1703.95	1595.48	2765.24	2218.96	2642.11	7.93	8.04	8.49	14.39	13.68	13.92	1733.56	2542.1	8.15333	13.9967	-0.779621	0.779621	3.60283e-05	0.0201996	no
comp12423_c0	comp12423_c0_seq1,comp12423_c0_seq2,comp12423_c0_seq3,comp12423_c0_seq4,comp12423_c0_seq5,comp12423_c0_seq6	2454	1866.23	Q9CXF4	-	GO:0005576(extracellular region);GO:0005739(mitochondrion);GO:0005097(Rab GTPase activator activity)	[T] Signal transduction mechanisms	-	-	1260.6	1136.08	1015.14	1871.58	1571.54	1889.6	16.13	17.62	16.99	29.96	31.78	30.7	1137.27	1777.57	16.9133	30.8133	-0.865394	0.865394	4.62068e-05	0.0210736	no
comp36017_c0	comp36017_c0_seq1	1617	1617	-	-	-	[R] General function prediction only	-	-	193.88	166.6	157	225.88	193	232.21	2.8	2.72	2.9	4.08	4.13	4.24	172.493	217.03	2.80667	4.15	-0.564254	0.564254	4.74195e-05	0.0210736	no
comp4328_c0	comp4328_c0_seq1	3439	3439	-	-	-	[D] Cell cycle control, cell division, chromosome partitioning	-	-	6073.69	4953.84	4636.78	7347.34	6505.32	7314.51	40.27	37.15	39.24	60.78	63.79	61.27	5221.44	7055.72	38.8867	61.9467	-0.671751	0.671751	6.09793e-05	0.0210809	no
comp9280_c0	comp9280_c0_seq1,comp9280_c0_seq2	3546	3472.57	Q9C882	-	GO:0005634(nucleus);GO:0043565(sequence-specific DNA binding);GO:0042631(cellular response to water deprivation);GO:0030308(negative regulation of cell growth);GO:0032876(negative regulation of DNA endoreduplication);GO:0045892(negative regulation of tran	[K] Transcription	-	-	547.87	447.39	396.36	813.8	645.16	791.44	3.6	3.33	3.32	6.66	6.26	6.56	463.873	750.133	3.41667	6.49333	-0.92637	0.92637	5.73351e-05	0.0210809	no
comp15396_c0	comp15396_c0_seq1,comp15396_c0_seq10,comp15396_c0_seq11,comp15396_c0_seq12,comp15396_c0_seq2,comp15396_c0_seq3,comp15396_c0_seq4,comp15396_c0_seq5,comp15396_c0_seq6,comp15396_c0_seq7,comp15396_c0_seq8,comp15396_c0_seq9	7057	6126.51	Q551H4	non-specific serine/threonine protein kinase	GO:0005524(ATP binding);GO:0046872(metal ion binding);GO:0004674(protein serine/threonine kinase activity)	[O] Posttranslational modification, protein turnover, chaperones	K08282	-	4662.63	4181.74	3841.85	6508.32	5614.35	6421.87	18.33	19.08	19.79	29.91	28.98	28.89	4228.74	6181.51	19.0667	29.26	-0.617877	0.617877	6.906e-05	0.0212696	no
comp14550_c0	comp14550_c0_seq1,comp14550_c0_seq2,comp14550_c0_seq3	2058	1968.26	-	-	-	-	-	-	884.88	859.03	696.7	1471.93	1173.36	1332.29	10.42	11.36	10.45	21.75	20.87	20.32	813.537	1325.86	10.7433	20.98	-0.965573	0.965573	7.09912e-05	0.0212956	no
comp18630_c0	comp18630_c0_seq1	3167	3167	Q9XHM1	translation initiation factor eIF-3 subunit 8	GO:0005852(eukaryotic translation initiation factor 3 complex);GO:0003743(translation initiation factor activity)	[J] Translation, ribosomal structure and biogenesis	K03252	-	4668.06	4305.9	4122.06	7164.49	6473.44	7391.58	33.67	35.13	37.95	64.48	69.06	67.36	4365.34	7009.84	35.5833	66.9667	-0.912241	0.912241	7.03387e-05	0.0212956	no
comp20969_c0	comp20969_c0_seq1	1951	1951	-	-	-	-	-	-	2217.89	1965.57	1851.51	878.44	791.32	975.92	26.36	26.42	28.09	13.03	13.91	14.66	2011.66	881.893	26.9567	13.8667	0.959021	0.959021	7.47622e-05	0.022014	no
comp19912_c0	comp19912_c0_seq1	784	784	-	-	-	-	-	-	3024.67	2685.67	2461.31	1190.84	1023.59	1320.73	95.04	95.45	98.72	46.69	47.57	52.43	2723.88	1178.39	96.4033	48.8967	0.979347	0.979347	7.62676e-05	0.0221851	no
comp20897_c0	comp20897_c0_seq1	744	744	Q08436	H+-transporting ATPase	GO:0016021(integral to membrane);GO:0005886(plasma membrane);GO:0005524(ATP binding);GO:0008553(hydrogen-exporting ATPase activity, phosphorylative mechanism);GO:0046872(metal ion binding);GO:0006754(ATP biosynthetic process)	[P] Inorganic ion transport and metabolism	K01535	ko00190(Oxidative phosphorylation)	421.02	346	325.99	562.92	504.33	583.03	14.02	13.03	13.86	23.39	24.84	24.53	364.337	550.093	13.6367	24.2533	-0.830692	0.830692	8.9197e-05	0.0236525	no
comp11712_c0	comp11712_c0_seq1,comp11712_c0_seq2	1195	1176.66	A6QPN6	interferon, gamma-inducible protein 30	GO:0005576(extracellular region);GO:0005764(lysosome);GO:0016667(oxidoreductase activity, acting on a sulfur group of donors);GO:0042590(antigen processing and presentation of exogenous peptide antigen via MHC class I)	[O] Posttranslational modification, protein turnover, chaperones	K08059	ko04612(Antigen processing and presentation)	832.03	713	657.96	382.17	341.01	370	16.64	16.08	16.78	9.7	10.36	9.38	734.33	364.393	16.5	9.81333	0.749651	0.749651	8.79009e-05	0.0236525	no
comp14491_c0	comp14491_c0_seq1,comp14491_c0_seq2,comp14491_c0_seq3,comp14491_c0_seq4,comp14491_c0_seq5	2755	2287.15	Q9SZD1	-	-	[P] Inorganic ion transport and metabolism	-	-	1344.98	1208.07	960.86	2000.6	1722.49	1865.86	13.8	14.29	12.8	26.66	27.1	25.24	1171.3	1862.98	13.63	26.3333	-0.950105	0.950105	8.69474e-05	0.0236525	no
comp18008_c0	comp18008_c0_seq1	1476	1476	O82515	mannitol dehydrogenase	GO:0046029(mannitol dehydrogenase activity);GO:0008270(zinc ion binding)	[Q] Secondary metabolites biosynthesis, transport and catabolism	K00095	-	11218.2	9853.13	8841.29	5701.41	4591.69	5573.12	178.51	177.34	179.58	113.2	108.06	112.05	9970.87	5288.74	178.477	111.103	0.683833	0.683833	8.73736e-05	0.0236525	no
comp13393_c0	comp13393_c0_seq1,comp13393_c0_seq2,comp13393_c0_seq3,comp13393_c0_seq4	1242	1149.99	-	-	-	[M] Cell wall/membrane/envelope biogenesis ;[O] Posttranslational modification, protein turnover, chaperones ;[T] Signal transduction mechanisms	-	-	409.24	364.82	309.2	486.77	386	455.36	8.56	8.61	8.24	12.42	11.92	11.99	361.087	442.71	8.47	12.11	-0.515765	0.515765	8.63065e-05	0.0236525	no
comp19758_c0	comp19758_c0_seq1	849	849	-	-	-	-	-	-	3358.25	3008.93	2788.05	1458.35	1369.17	1603.51	96.67	97.97	102.44	52.38	58.29	58.32	3051.74	1477.01	99.0267	56.33	0.813914	0.813914	9.41397e-05	0.0241616	no
comp9989_c0	comp9989_c0_seq1,comp9989_c0_seq2	2784	2642.56	-	-	-	[S] Function unknown	-	-	884.01	791.25	793	1441.78	1277.83	1435.12	7.71	7.91	8.85	15.66	16.71	15.63	822.753	1384.91	8.15667	16	-0.97202	0.97202	9.6236e-05	0.0243883	no
comp4360_c0	comp4360_c0_seq1	879	879	-	-	-	-	-	-	4385.7	3711.72	3360.78	2065.02	1721.59	1845.1	121.54	116.35	118.89	71.41	70.56	64.61	3819.4	1877.24	118.927	68.86	0.788334	0.788334	9.70534e-05	0.0243883	no
comp15215_c2	comp15215_c2_seq1,comp15215_c2_seq10,comp15215_c2_seq2,comp15215_c2_seq3,comp15215_c2_seq4,comp15215_c2_seq5,comp15215_c2_seq6,comp15215_c2_seq7,comp15215_c2_seq8,comp15215_c2_seq9	1982	969.93	Q94AN4	AP2-like factor, ANT lineage	GO:0005634(nucleus);GO:0003677(DNA binding);GO:0003700(sequence-specific DNA binding transcription factor activity);GO:0009873(ethylene mediated signaling pathway);GO:0010187(negative regulation of seed germination);GO:0040008(regulation of growth);GO:000	-	K09285	-	1949.99	1717.75	1494.61	3177.29	2842.8	3034.15	44.63	41.2	40.27	82.22	87.66	81.95	1720.78	3018.08	42.0333	83.9433	-0.997882	0.997882	0.000106387	0.0245841	no
comp6032_c0	comp6032_c0_seq1	1987	1987	Q8GXR9	NADH dehydrogenase	GO:0005618(cell wall);GO:0031304(intrinsic to mitochondrial inner membrane);GO:0010287(plastoglobule);GO:0050660(flavin adenine dinucleotide binding);GO:0016491(oxidoreductase activity)	-	K03885	ko00190(Oxidative phosphorylation)	545.44	478.08	465.36	798.91	716.55	784.99	6.36	6.31	6.93	11.63	12.36	11.57	496.293	766.817	6.53333	11.8533	-0.859402	0.859402	0.000115678	0.0245841	no
comp16921_c5	comp16921_c5_seq1,comp16921_c5_seq2,comp16921_c5_seq3	4690	4351.25	Q9LKL2	pseudo-response regulator 1	GO:0005634(nucleus);GO:0005515(protein binding);GO:0000156(two-component response regulator activity);GO:0007623(circadian rhythm);GO:0010031(circumnutation);GO:0006355(regulation of transcription, DNA-dependent);GO:0006351(transcription, DNA-dependent)	[K] Transcription	K12127	ko04712(Circadian rhythm - plant)	2430.94	2349.64	2135.34	4146.49	3256.46	4092.2	12.73	14.09	14.28	27.17	25.26	26.99	2305.31	3831.72	13.7	26.4733	-0.950364	0.950364	0.00011167	0.0245841	no
comp12608_c0	comp12608_c0_seq1	2112	2112	Q9LEV3	-	GO:0005739(mitochondrion);GO:0003824(catalytic activity);GO:0050897(cobalt ion binding);GO:0009651(response to salt stress)	-	-	-	55955.6	50559.1	41513.2	22453.2	21617.6	23568.3	612.53	626.01	580.06	306.69	349.99	325.97	49342.6	22546.4	606.2	327.55	0.888079	0.888079	0.000119084	0.0245841	no
comp16552_c2	comp16552_c2_seq1,comp16552_c2_seq10,comp16552_c2_seq11,comp16552_c2_seq12,comp16552_c2_seq13,comp16552_c2_seq14,comp16552_c2_seq15,comp16552_c2_seq16,comp16552_c2_seq17,comp16552_c2_seq18,comp16552_c2_seq19,comp16552_c2_seq2,comp16552_c2_seq20,comp16552_	6151	2763.79	Q9LSL9	-	GO:0005488(binding)	[R] General function prediction only	-	-	6325.77	5188.1	4769.04	8599.87	6889.11	8056.96	60.16	55.82	56.67	87.77	92.75	92.42	5427.64	7848.65	57.55	90.98	-0.660734	0.660734	0.000112158	0.0245841	no
comp19036_c0	comp19036_c0_seq1	1605	1605	Q90Y35	-	GO:0005737(cytoplasm);GO:0005634(nucleus);GO:0003676(nucleic acid binding);GO:0008270(zinc ion binding)	[R] General function prediction only	-	-	5046.27	4329.13	3897.23	2520.07	2171.41	2674.18	73.53	71.35	72.49	45.82	46.8	49.23	4424.21	2455.22	72.4567	47.2833	0.615787	0.615787	0.000112859	0.0245841	no
comp16043_c0	comp16043_c0_seq1,comp16043_c0_seq10,comp16043_c0_seq11,comp16043_c0_seq12,comp16043_c0_seq13,comp16043_c0_seq14,comp16043_c0_seq15,comp16043_c0_seq16,comp16043_c0_seq17,comp16043_c0_seq18,comp16043_c0_seq2,comp16043_c0_seq3,comp16043_c0_seq4,comp16043_c0	2904	2131.32	Q60EX6	protein phosphatase	GO:0005634(nucleus);GO:0005506(iron ion binding);GO:0030145(manganese ion binding);GO:0004721(phosphoprotein phosphatase activity)	[R] General function prediction only	K01090	-	910.99	895.99	777.86	1329.23	1021.71	1250.06	10.46	11.19	11.48	18.2	17.21	17.45	861.613	1200.33	11.0433	17.62	-0.674038	0.674038	0.000102389	0.0245841	no
comp4356_c0	comp4356_c0_seq1,comp4356_c0_seq2,comp4356_c0_seq3	5427	4387.75	Q805A1	large subunit ribosomal protein L1	GO:0005694(chromosome);GO:0009295(nucleoid);GO:0005634(nucleus);GO:0005524(ATP binding);GO:0003677(DNA binding);GO:0030261(chromosome condensation);GO:0007059(chromosome segregation);GO:0006310(DNA recombination);GO:0006281(DNA repair)	[B] Chromatin structure and dynamics ;[D] Cell cycle control, cell division, chromosome partitioning ;[L] Replication, recombination and repair	K02863	ko03010(Ribosome)	6249.39	5475.51	4313.58	8510.69	7008.08	8564.6	32.31	32.01	28.57	55.77	53.55	57.11	5346.16	8027.79	30.9633	55.4767	-0.84132	0.84132	0.000117285	0.0245841	no
comp3408_c0	comp3408_c0_seq1,comp3408_c0_seq2	1684	1585.93	Q9UNI6	protein-tyrosine phosphatase	GO:0005737(cytoplasm);GO:0005634(nucleus);GO:0004725(protein tyrosine phosphatase activity);GO:0008138(protein tyrosine/serine/threonine phosphatase activity);GO:0008270(zinc ion binding);GO:0033133(positive regulation of glucokinase activity)	[V] Defense mechanisms	K01104	-	745.69	622	558.64	310	265.45	323.07	11.07	10.42	10.59	5.65	5.73	6.04	642.11	299.507	10.6933	5.80667	0.88093	0.88093	0.000114722	0.0245841	no
comp12281_c0	comp12281_c0_seq1,comp12281_c0_seq2,comp12281_c0_seq3,comp12281_c0_seq4	2775	2219.94	Q8L7E5	-	GO:0016021(integral to membrane);GO:0031965(nuclear membrane);GO:0005515(protein binding)	-	-	-	1312.58	1199.93	976.44	1754.05	1580.97	1713.89	16.11	15.05	16.4	24.54	25.75	24.38	1162.98	1682.97	15.8533	24.89	-0.65078	0.65078	0.000112439	0.0245841	no
comp12513_c0	comp12513_c0_seq1,comp12513_c0_seq2,comp12513_c0_seq3	3379	3015.65	Q67YI9	epsin	GO:0030136(clathrin-coated vesicle);GO:0005794(Golgi apparatus);GO:0005886(plasma membrane);GO:0005774(vacuolar membrane);GO:0030276(clathrin binding);GO:0005543(phospholipid binding);GO:0015031(protein transport)	[F] Nucleotide transport and metabolism	K12471	ko04144(Endocytosis)	5418.72	4629.07	4025.49	5838.98	4706.04	5750.01	41.01	40.12	39.3	53.21	53.22	55.18	4691.09	5431.68	40.1433	53.87	-0.424322	0.424322	0.000122961	0.0245902	no
comp20818_c0	comp20818_c0_seq1	1275	1275	Q8L4B2	nuclear transcription factor Y, gamma	GO:0005829(cytosol);GO:0005634(nucleus);GO:0043565(sequence-specific DNA binding);GO:0006355(regulation of transcription, DNA-dependent);GO:0006351(transcription, DNA-dependent)	[K] Transcription	K08066	ko04612(Antigen processing and presentation)	1220.01	1126.59	1062	1614.27	1406.21	1687.34	22.66	23.67	25.18	37.42	38.63	39.6	1136.2	1569.27	23.8367	38.55	-0.693548	0.693548	0.000125179	0.0248235	no
comp15153_c3	comp15153_c3_seq1,comp15153_c3_seq2	3045	3015.27	Q6NY98	mRNA guanylyltransferase	GO:0005634(nucleus);GO:0005525(GTP binding);GO:0004484(mRNA guanylyltransferase activity);GO:0004651(polynucleotide 5'-phosphatase activity);GO:0004725(protein tyrosine phosphatase activity);GO:0008138(protein tyrosine/serine/threonine phosphatase activit	[A] RNA processing and modification	K00987	-	1774.98	1590.17	1248.36	2502.29	2079.79	2313.97	13.37	13.61	11.98	23.79	23.48	22.19	1537.84	2298.68	12.9867	23.1533	-0.834189	0.834189	0.00013615	0.025049	no
comp6063_c0	comp6063_c0_seq1,comp6063_c0_seq2	1851	1848.77	Q84MB2	-	GO:0005634(nucleus);GO:0005515(protein binding)	-	-	-	5001.34	4284.64	3847.48	2961.58	2443.41	2903.96	62.85	60.88	61.7	46.49	45.48	46.12	4377.82	2769.65	61.81	46.03	0.425266	0.425266	0.000149797	0.025049	no
comp5522_c0	comp5522_c0_seq1,comp5522_c0_seq2	1783	1768.32	Q2MHE4	sterile alpha motif and leucine zipper containing kinase AZK	GO:0005524(ATP binding);GO:0004674(protein serine/threonine kinase activity);GO:0010119(regulation of stomatal movement)	[T] Signal transduction mechanisms	K04424	ko04010(MAPK signaling pathway);ko04530(Tight junction)	1306.55	1169.81	914.31	1739.77	1551.19	1832.84	17.18	17.42	15.3	28.79	30.4	30.56	1130.22	1707.93	16.6333	29.9167	-0.846872	0.846872	0.000132971	0.025049	no
comp4943_c0	comp4943_c0_seq1,comp4943_c0_seq2	1415	1406.59	Q9VUQ8	-	GO:0005737(cytoplasm);GO:0005634(nucleus);GO:0043130(ubiquitin binding);GO:0045116(protein neddylation)	[S] Function unknown	-	-	3924.8	3433.08	3198.15	2028.13	1746.13	2104.32	65.76	65.12	68.37	42.36	43.22	44.51	3518.68	1959.53	66.4167	43.3633	0.61507	0.61507	0.000136545	0.025049	no
comp13770_c0	comp13770_c0_seq1,comp13770_c0_seq2	3292	3247.62	-	-	-	-	-	-	692.02	588.6	509.84	887	723.7	825.01	4.87	4.68	4.57	7.78	7.53	7.33	596.82	811.903	4.70667	7.54667	-0.681134	0.681134	0.000138012	0.025049	no
comp4954_c0	comp4954_c0_seq1,comp4954_c0_seq2	2508	2474.84	Q8GY87	ubiquitin-conjugating enzyme E2 O	GO:0005524(ATP binding);GO:0004842(ubiquitin-protein ligase activity)	[O] Posttranslational modification, protein turnover, chaperones	K10581	ko04120(Ubiquitin mediated proteolysis)	671	612.94	478.38	886.47	765.05	835.16	6.23	6.41	5.75	10.3	10.54	9.82	587.44	828.893	6.13	10.22	-0.737436	0.737436	0.000149779	0.025049	no
comp3981_c1	comp3981_c1_seq1	505	505	Q9FDW1	myb proto-oncogene protein, plant	GO:0005634(nucleus);GO:0003677(DNA binding);GO:0009738(abscisic acid mediated signaling pathway);GO:0006355(regulation of transcription, DNA-dependent);GO:0009733(response to auxin stimulus);GO:0046686(response to cadmium ion);GO:0010200(response to chiti	[K] Transcription	K09422	-	543.05	507	471.01	751.13	618.04	693.01	28.11	29.68	31.12	48.51	47.31	45.32	507.02	687.393	29.6367	47.0467	-0.666709	0.666709	0.000170386	0.0266789	no
comp14129_c2	comp14129_c2_seq1	1212	1212	-	lysophospholipase II	-	[I] Lipid transport and metabolism	K06130	ko00564(Glycerophospholipid metabolism)	3098.45	2931.6	2454.86	1432.77	1098.96	1496.32	60.74	65.01	61.43	35.05	31.86	37.06	2828.3	1342.68	62.3933	34.6567	0.848259	0.848259	0.000178686	0.0271072	no
comp22639_c0	comp22639_c0_seq1	1984	1984	Q9FKT0	actin, other eukaryote	GO:0005634(nucleus);GO:0030029(actin filament-based process)	[Z] Cytoskeleton	K10355	-	704	579.03	495.01	979.91	788.71	1001.97	8.22	7.65	7.38	14.28	13.62	14.79	592.68	923.53	7.75	14.23	-0.876667	0.876667	0.000181509	0.0271817	no
comp17080_c0	comp17080_c0_seq1	685	685	-	-	-	-	-	-	30556.9	27311.8	25806.9	12746.1	10107.7	14084.6	1115.71	1127.97	1202.78	580.72	545.84	649.77	27891.9	12312.8	1148.82	592.11	0.956216	0.956216	0.000182895	0.0272616	no
comp6764_c0	comp6764_c0_seq1,comp6764_c0_seq2	2008	1998.71	Q9H1Z4	-	GO:0005737(cytoplasm);GO:0005634(nucleus)	[R] General function prediction only	-	-	1588.8	1374.45	1192.66	1542.48	1307.91	1563.24	18.41	18.01	17.61	22.36	22.48	22.88	1385.3	1471.21	18.01	22.5733	-0.325821	0.325821	0.000189343	0.0275386	no
comp16650_c0	comp16650_c0_seq1,comp16650_c0_seq2,comp16650_c0_seq3	1838	1623.88	-	-	-	-	-	-	4755.68	3866.74	3738.05	6312.99	5640.92	6077.8	70.76	64.44	69.33	110.12	116.13	108.25	4120.16	6010.57	68.1767	111.5	-0.709694	0.709694	0.000188988	0.0275386	no
comp19755_c0	comp19755_c0_seq1	2033	2033	Q99JW2	aminoacylase	GO:0005737(cytoplasm);GO:0004046(aminoacylase activity);GO:0046872(metal ion binding);GO:0008237(metallopeptidase activity);GO:0006520(cellular amino acid metabolic process);GO:0006508(proteolysis)	[E] Amino acid transport and metabolism	K01436	ko00330(Arginine and proline metabolism)	4617.56	4230.96	3847.14	2579.04	2013.77	2591.17	52.59	54.5	55.92	36.65	33.92	37.28	4231.89	2394.66	54.3367	35.95	0.595934	0.595934	0.000206168	0.0282945	no
comp19671_c0	comp19671_c0_seq1	7655	7655	Q38970	acetyl-CoA carboxylase / biotin carboxylase	GO:0005829(cytosol);GO:0005886(plasma membrane);GO:0003989(acetyl-CoA carboxylase activity);GO:0005524(ATP binding);GO:0004075(biotin carboxylase activity);GO:0046872(metal ion binding);GO:0030497(fatty acid elongation);GO:0010072(primary shoot apical mer	[I] Lipid transport and metabolism	K11262	ko00061(Fatty acid biosynthesis);ko00620(Pyruvate metabolism);ko00640(Propanoate metabolism);ko04910(Insulin signaling pathway)	2608.55	2168.46	1963.9	3704.12	3011.54	3761.4	7.68	7.22	7.38	13.6	13.11	13.99	2246.97	3492.35	7.42667	13.5667	-0.86928	0.86928	0.000207313	0.0283482	no
comp55091_c0	comp55091_c0_seq1	1906	1906	A8MQA3	-	GO:0005488(binding)	[R] General function prediction only	-	-	203.73	172	148.02	223.37	194.33	225.83	2.48	2.37	2.3	3.39	3.5	3.47	174.583	214.51	2.38333	3.45333	-0.535009	0.535009	0.000210524	0.0285433	no
comp22909_c0	comp22909_c0_seq1	5328	5328	Q54S77	phosphoinositide-3-kinase, regulatory subunit 4, p150	GO:0000139(Golgi membrane);GO:0005524(ATP binding);GO:0004674(protein serine/threonine kinase activity);GO:0045053(protein retention in Golgi apparatus);GO:0006623(protein targeting to vacuole)	[T] Signal transduction mechanisms	K08333	ko04140(Regulation of autophagy)	1286.01	1288.86	982.77	1986.28	1591.23	2029.76	5.46	6.19	5.33	10.52	9.99	10.89	1185.88	1869.09	5.66	10.4667	-0.886928	0.886928	0.000211978	0.0285663	no
comp17061_c0	comp17061_c0_seq1	948	948	Q9FHW7	S-phase kinase-associated protein 1	GO:0005634(nucleus);GO:0005515(protein binding);GO:0009734(auxin mediated signaling pathway);GO:0007059(chromosome segregation);GO:0009793(embryo development ending in seed dormancy);GO:0009873(ethylene mediated signaling pathway);GO:0044419(interspecies	[O] Posttranslational modification, protein turnover, chaperones	K03094	ko04110(Cell cycle);ko04111(Cell cycle - yeast);ko04114(Oocyte meiosis);ko04120(Ubiquitin mediated proteolysis);ko04310(Wnt signaling pathway);ko04350(TGF-beta signaling pathway)	35521.1	30718.1	28707.1	17341.8	13691	18134.1	906.69	886.89	935.34	552.35	516.86	584.84	31648.8	16389	909.64	551.35	0.722327	0.722327	0.000223738	0.0288797	no
comp4339_c0	comp4339_c0_seq1	1046	1046	-	-	-	[S] Function unknown	-	-	3597.91	3177.28	3030.93	1623.93	1406.84	1801.34	82.58	82.49	88.8	46.51	47.76	52.24	3268.71	1610.7	84.6233	48.8367	0.793091	0.793091	0.00023312	0.0289009	no
comp13258_c0	comp13258_c0_seq1,comp13258_c0_seq2,comp13258_c0_seq3,comp13258_c0_seq4	2580	2225.53	Q9FZH5	mannose-6-phosphate isomerase	-	[G] Carbohydrate transport and metabolism	K01809	ko00051(Fructose and mannose metabolism);ko00520(Amino sugar and nucleotide sugar metabolism)	596	585.41	550.64	893.11	748.33	941.38	5.93	6.49	6.75	10.81	11.01	11.73	577.35	860.94	6.39	11.1833	-0.807462	0.807462	0.000229967	0.0289009	no
comp10598_c0	comp10598_c0_seq1,comp10598_c0_seq2	3455	3430.1	Q9ZWJ9	-	GO:0005634(nucleus);GO:0003677(DNA binding);GO:0005515(protein binding);GO:0003700(sequence-specific DNA binding transcription factor activity);GO:0000156(two-component response regulator activity);GO:0009736(cytokinin mediated signaling pathway);GO:00098	[K] Transcription	-	-	3392.88	2951.34	2752.23	3763.68	3128.46	3725.55	22.58	22.21	23.37	31.21	30.75	31.31	3032.15	3539.23	22.72	31.09	-0.452488	0.452488	0.000231762	0.0289009	no
comp12870_c0	comp12870_c0_seq1,comp12870_c0_seq2,comp12870_c0_seq3,comp12870_c0_seq4	2574	1971.91	Q6DBP3	-	GO:0016021(integral to membrane);GO:0008643(carbohydrate transport)	[G] Carbohydrate transport and metabolism ;[E] Amino acid transport and metabolism	-	-	3527.49	3319.27	2398.53	5630.66	5054.74	5746.31	41.28	42.65	36.09	73.2	80.45	78.78	3081.76	5477.24	40.0067	77.4767	-0.953521	0.953521	0.000237604	0.0290919	no
comp23614_c0	comp23614_c0_seq1	2656	2656	-	mitochondrial chaperone BCS1	-	[O] Posttranslational modification, protein turnover, chaperones	K08900	-	1150	895.26	820	1619.6	1287.78	1463.17	9.94	8.75	9.04	17.46	16.46	15.97	955.087	1456.85	9.24333	16.63	-0.847303	0.847303	0.000251222	0.0291564	no
comp28733_c0	comp28733_c0_seq1	2820	2820	-	-	-	-	-	-	631.14	621.39	535.91	985.05	907.72	1015	5.13	5.71	5.56	9.99	10.91	10.42	596.147	969.257	5.46667	10.44	-0.933388	0.933388	0.000252275	0.0291564	no
comp21904_c0	comp21904_c0_seq1	1574	1574	-	-	-	[S] Function unknown	-	-	1850.46	1705.44	1559.15	868.48	790.09	904.19	27.52	28.69	29.6	16.12	17.38	16.99	1705.02	854.253	28.6033	16.83	0.765148	0.765148	0.000252031	0.0291564	no
comp17985_c0	comp17985_c0_seq1	928	928	Q4KLF5	nascent polypeptide-associated complex subunit beta	-	[K] Transcription	K01527	-	5926.42	5597.43	4812.9	2198.07	2202.86	2574.09	154.82	165.39	160.49	71.65	85.11	84.96	5445.58	2325.01	160.233	80.5733	0.9918	0.9918	0.000266314	0.0295523	no
comp8592_c0	comp8592_c0_seq1,comp8592_c0_seq2	2084	1961.75	Q5R6C7	-	GO:0000166(nucleotide binding);GO:0003723(RNA binding)	[A] RNA processing and modification	-	-	249.14	259.81	246.94	415	376.74	421.6	2.96	3.4	3.56	5.99	6.58	6.34	251.963	404.447	3.30667	6.30333	-0.930737	0.930737	0.00027249	0.0295523	no
comp22110_c0	comp22110_c0_seq1	2184	2184	-	-	-	-	-	-	548.09	482.95	364	758.98	697.91	819.12	5.8	5.78	4.91	10.01	10.91	10.94	465.013	758.67	5.49667	10.62	-0.950155	0.950155	0.000269665	0.0295523	no
comp14954_c0	comp14954_c0_seq1,comp14954_c0_seq10,comp14954_c0_seq11,comp14954_c0_seq12,comp14954_c0_seq2,comp14954_c0_seq3,comp14954_c0_seq4,comp14954_c0_seq5,comp14954_c0_seq6,comp14954_c0_seq7,comp14954_c0_seq8,comp14954_c0_seq9	2780	2395.67	Q5HZ38	calcium/calmodulin-dependent protein kinase kinase	-	[T] Signal transduction mechanisms	K07359	ko04920(Adipocytokine signaling pathway)	3835.32	3653.26	2840.42	5653.9	5204.22	5753.78	38.39	40.8	35.78	67.25	73.76	69.66	3443	5537.3	38.3233	70.2233	-0.873727	0.873727	0.000272894	0.0295523	no
comp22615_c0	comp22615_c0_seq1	1972	1972	Q8BM39	-	GO:0016607(nuclear speck);GO:0005681(spliceosomal complex);GO:0006397(mRNA processing);GO:0008380(RNA splicing)	[A] RNA processing and modification	-	-	1060.99	845.13	839.87	1261.82	1133.12	1320.96	12.47	11.24	12.6	18.51	19.7	19.62	915.33	1238.63	12.1033	19.2767	-0.671451	0.671451	0.000265086	0.0295523	no
comp22396_c0	comp22396_c0_seq1	1373	1373	P42620	putative glutathione S-transferase	-	[O] Posttranslational modification, protein turnover, chaperones	K07393	-	1734.43	1422.74	1332.36	811.14	631.04	788.37	29.79	27.64	29.21	17.38	16.03	17.11	1496.51	743.517	28.88	16.84	0.778179	0.778179	0.000262597	0.0295523	no
comp19429_c0	comp19429_c0_seq1	1974	1974	Q9SX31	RUN and FYVE domain-containing protein 1	GO:0016021(integral to membrane);GO:0005886(plasma membrane);GO:0005524(ATP binding);GO:0004674(protein serine/threonine kinase activity)	[R] General function prediction only	K12482	ko04144(Endocytosis)	2413.98	1897.33	1802.43	3723.89	2872.23	3471.52	28.34	25.2	27.01	54.56	49.88	51.5	2037.91	3355.88	26.85	51.98	-0.953035	0.953035	0.00026239	0.0295523	no
comp18223_c0	comp18223_c0_seq1	1272	1272	Q9M1E7	-	-	-	-	-	6471.62	6031.32	5441.6	3352.23	2957.39	3642.69	120.51	127.04	129.35	77.89	81.45	85.71	5981.51	3317.44	125.633	81.6833	0.621106	0.621106	0.000261036	0.0295523	no
comp29341_c0	comp29341_c0_seq1	2685	2685	Q9LKF9	-	GO:0005847(mRNA cleavage and polyadenylation specificity factor complex);GO:0009506(plasmodesma);GO:0016787(hydrolase activity);GO:0005515(protein binding);GO:0003723(RNA binding);GO:0006397(mRNA processing);GO:0035194(posttranscriptional gene silencing b	[A] RNA processing and modification	-	-	529.1	549.27	422.78	852.75	788.04	849.43	4.52	5.31	4.61	9.09	9.96	9.17	500.383	830.073	4.81333	9.40667	-0.966647	0.966647	0.000267472	0.0295523	no
comp4455_c0	comp4455_c0_seq1	2600	2600	Q8L7G0	-	GO:0005634(nucleus);GO:0003677(DNA binding);GO:0046983(protein dimerization activity);GO:0009734(auxin mediated signaling pathway);GO:0010150(leaf senescence);GO:0045892(negative regulation of transcription, DNA-dependent);GO:0006351(transcription, DNA-de	-	-	-	3863.89	3344.28	3282.86	4778.18	4064.03	5036.96	34.13	33.41	37.01	52.66	53.09	56.21	3497.01	4626.39	34.85	53.9867	-0.631444	0.631444	0.000259625	0.0295523	no
comp22007_c0	comp22007_c0_seq1	3816	3816	Q54YP4	-	GO:0030897(HOPS complex);GO:0008270(zinc ion binding);GO:0015031(protein transport);GO:0042144(vacuole fusion, non-autophagic);GO:0016192(vesicle-mediated transport)	[U] Intracellular trafficking, secretion, and vesicular transport	-	-	1986.52	1658.33	1606.5	2212.04	1960.75	2230.97	11.84	11.18	12.23	16.46	17.29	16.81	1750.45	2134.59	11.75	16.8533	-0.520373	0.520373	0.000271492	0.0295523	no
comp24204_c0	comp24204_c0_seq1	1066	1066	Q0IHH1	ribosomal-protein-alanine N-acetyltransferase	GO:0008080(N-acetyltransferase activity)	[R] General function prediction only	K00676	-	1032.37	888.16	762.01	384.99	380.01	381.91	23.22	22.59	21.87	10.8	12.64	10.85	894.18	382.303	22.56	11.43	0.980942	0.980942	0.00027768	0.0295694	no
comp20586_c0	comp20586_c0_seq1	2489	2489	Q9NW82	cyclin-dependent kinase 8/11	-	[S] Function unknown	K02208	-	1490.75	1303.27	1257.54	1919.06	1581.52	1832.82	13.77	13.62	14.83	22.12	21.61	21.39	1350.52	1777.8	14.0733	21.7067	-0.625174	0.625174	0.000296951	0.0295694	no
comp16740_c0	comp16740_c0_seq1,comp16740_c0_seq10,comp16740_c0_seq11,comp16740_c0_seq12,comp16740_c0_seq13,comp16740_c0_seq14,comp16740_c0_seq15,comp16740_c0_seq16,comp16740_c0_seq17,comp16740_c0_seq18,comp16740_c0_seq19,comp16740_c0_seq2,comp16740_c0_seq20,comp16740_	6533	1925.73	Q4VZH1	NADH dehydrogenase I subunit K	GO:0009535(chloroplast thylakoid membrane);GO:0051539(4 iron, 4 sulfur cluster binding);GO:0046872(metal ion binding);GO:0008137(NADH dehydrogenase (ubiquinone) activity);GO:0048038(quinone binding);GO:0006810(transport)	[C] Energy production and conversion	K05582	ko00190(Oxidative phosphorylation)	3174.67	2768.54	2640.86	4132.31	3525.15	3816.8	42.95	40.73	46.07	69.38	69.65	65.61	2861.36	3824.75	43.25	68.2133	-0.657354	0.657354	0.000293131	0.0295694	no
comp4995_c0	comp4995_c0_seq1,comp4995_c0_seq2	3580	3161.02	Q8RWD6	-	-	-	-	-	1291.46	1096.95	934.3	1367.61	1165.12	1284.49	9.02	8.76	8.42	12.21	12.34	11.67	1107.57	1272.41	8.73333	12.0733	-0.46722	0.46722	0.000281623	0.0295694	no
comp16937_c0	comp16937_c0_seq1,comp16937_c0_seq2,comp16937_c0_seq3,comp16937_c0_seq4	5495	4316.68	Q9SMX9	-	GO:0005634(nucleus);GO:0003677(DNA binding);GO:0046872(metal ion binding);GO:0006355(regulation of transcription, DNA-dependent);GO:0006351(transcription, DNA-dependent)	-	-	-	12508.9	10687.2	10001.6	17223.2	14207.9	15503.1	66.56	64.25	68.58	106.65	105.79	100.22	11065.9	15644.7	66.4633	104.22	-0.649002	0.649002	0.000287885	0.0295694	no
comp9257_c0	comp9257_c0_seq1,comp9257_c0_seq2,comp9257_c0_seq3,comp9257_c0_seq4	3199	3102.22	Q10146	-	GO:0000176(nuclear exosome (RNase complex));GO:0005730(nucleolus);GO:0000175(3'-5'-exoribonuclease activity);GO:0000166(nucleotide binding);GO:0003723(RNA binding);GO:0000467(exonucleolytic trimming to generate mature 3'-end of 5.8S rRNA from tricistronic	[J] Translation, ribosomal structure and biogenesis	K01149	-	836.77	840.71	620	1435.79	1103.98	1307	6.17	7.01	5.82	13.22	12.05	12.16	765.827	1282.26	6.33333	12.4767	-0.978196	0.978196	0.000284837	0.0295694	no
comp4546_c1	comp4546_c1_seq1	640	640	Q9LZZ9	GABA(A) receptor-associated protein (autophagy-related protein 8)	GO:0000421(autophagic vacuole membrane);GO:0033110(CVT vesicle membrane);GO:0005874(microtubule);GO:0006914(autophagy);GO:0015031(protein transport)	[Z] Cytoskeleton	K08341	ko04140(Regulation of autophagy)	2592.8	2393.2	2226.09	1231.33	997.79	1318.26	102.2	106.7	112	60.56	58.17	65.65	2404.03	1182.46	106.967	61.46	0.799442	0.799442	0.000312782	0.029708	no
comp9451_c1	comp9451_c1_seq1	575	575	Q8BKC5	-	GO:0005737(cytoplasm);GO:0005634(nucleus);GO:0005515(protein binding);GO:0008565(protein transporter activity)	[Y] Nuclear structure ;[U] Intracellular trafficking, secretion, and vesicular transport	-	-	278.01	208.86	217.96	372.2	343.98	388.03	12.38	10.52	12.39	20.68	22.65	21.83	234.943	368.07	11.7633	21.72	-0.884727	0.884727	0.00030796	0.029708	no
comp5875_c0	comp5875_c0_seq1,comp5875_c0_seq2	1540	1207.22	-	-	-	[I] Lipid transport and metabolism	-	-	410.01	336.32	316.11	537.95	469.16	571.96	8.03	7.33	7.88	12.55	13.38	13.58	354.147	526.357	7.74667	13.17	-0.765608	0.765608	0.000312953	0.029708	no
comp17062_c0	comp17062_c0_seq1	4854	4854	-	-	-	-	-	-	84895.6	69173.1	65731.1	41437.2	30098.7	36455.2	396.23	365.17	391.59	241.32	207.76	214.97	73266.6	35997	384.33	221.35	0.796016	0.796016	0.000321165	0.0297604	no
comp25900_c0	comp25900_c0_seq1	3113	3113	D7REX8	STIP1 homology and U-box containing protein 1	GO:0005829(cytosol);GO:0005488(binding)	[O] Posttranslational modification, protein turnover, chaperones ;[D] Cell cycle control, cell division, chromosome partitioning ;[R] General function prediction only	K09561	ko04120(Ubiquitin mediated proteolysis)	875.81	788	697.04	1325.49	1132.41	1361.28	6.43	6.54	6.53	12.14	12.29	12.63	786.95	1273.06	6.5	12.3533	-0.926389	0.926389	0.000322861	0.0298	no
comp13329_c0	comp13329_c0_seq1,comp13329_c0_seq2,comp13329_c0_seq3,comp13329_c0_seq4,comp13329_c0_seq5,comp13329_c0_seq6	4165	2724.12	Q8L746	-	GO:0005634(nucleus);GO:0005515(protein binding);GO:0009816(defense response to bacterium, incompatible interaction);GO:0009817(defense response to fungus, incompatible interaction)	[R] General function prediction only	-	-	3064.58	2786.46	2278.41	3818.75	3366.29	3752.99	26	28.15	25.38	38.67	41.62	40.22	2709.82	3646.01	26.51	40.17	-0.599582	0.599582	0.000335618	0.0301654	no
comp17031_c0	comp17031_c0_seq1	1365	1365	P59169	histone H3	GO:0000786(nucleosome);GO:0005634(nucleus);GO:0003677(DNA binding);GO:0006334(nucleosome assembly)	[B] Chromatin structure and dynamics	K11253	ko05322(Systemic lupus erythematosus)	30992.8	29192.8	25521.2	18910.3	15122.1	17091.7	535.57	570.61	562.94	407.76	386.49	373.17	28568.9	17041.4	556.373	389.14	0.515764	0.515764	0.000341261	0.0302757	no
comp18854_c0	comp18854_c0_seq1	1316	1316	Q9LZM7	-	GO:0005789(endoplasmic reticulum membrane);GO:0016021(integral to membrane);GO:0016192(vesicle-mediated transport)	-	-	-	3974.96	3511.95	3296.44	1919.41	1687.56	2155.81	71.4	71.35	75.58	43.02	44.83	48.93	3594.45	1920.93	72.7767	45.5933	0.674653	0.674653	0.000344131	0.0302937	no
comp31767_c0	comp31767_c0_seq1	471	471	-	-	-	-	-	-	102.98	105	91.08	154.05	128.43	141.81	5.79	6.67	6.53	10.8	10.67	10.07	99.6867	141.43	6.33	10.5133	-0.731943	0.731943	0.000357822	0.030675	no
comp12553_c0	comp12553_c0_seq1,comp12553_c0_seq2,comp12553_c0_seq3,comp12553_c0_seq4	2172	1866.89	-	heat shock protein HspQ	-	-	K11940	-	1607.2	1633.89	1359.96	2514.53	2048.21	2244	20.36	23	22.04	35.85	34.62	33.02	1533.68	2268.91	21.8	34.4967	-0.662129	0.662129	0.000358644	0.030675	no
comp17979_c0	comp17979_c0_seq1	1701	1701	P41380	translation initiation factor eIF-4A	GO:0005524(ATP binding);GO:0008026(ATP-dependent helicase activity);GO:0003743(translation initiation factor activity)	[J] Translation, ribosomal structure and biogenesis	K03257	-	14666	12867.5	12398.1	7457.59	5468.5	7074.7	201.1	199.57	217	127.6	110.9	122.57	13310.5	6666.93	205.89	120.357	0.774558	0.774558	0.000355052	0.030675	no
comp16574_c0	comp16574_c0_seq1,comp16574_c0_seq10,comp16574_c0_seq11,comp16574_c0_seq2,comp16574_c0_seq3,comp16574_c0_seq4,comp16574_c0_seq5,comp16574_c0_seq6,comp16574_c0_seq7,comp16574_c0_seq8,comp16574_c0_seq9	1908	1562.02	-	DNA-directed RNA polymerase I subunit A43	-	-	K03004	ko00230(Purine metabolism);ko00240(Pyrimidine metabolism);ko03020(RNA polymerase)	245.12	263.85	206.64	386.35	355.25	423.32	3.82	4.52	4.12	7.19	7.91	7.84	238.537	388.307	4.15333	7.64667	-0.880561	0.880561	0.00036444	0.0307952	no
comp22780_c0	comp22780_c0_seq1	1119	1119	F4IUX6	-	-	[A] RNA processing and modification	-	-	610.15	528.77	561.93	978.94	910.44	971.64	13.03	12.77	15.31	26.08	28.75	26.21	566.95	953.673	13.7033	27.0133	-0.979145	0.979145	0.000369827	0.0309727	no
comp19721_c0	comp19721_c0_seq1	1129	1129	Q3SZX8	-	-	[R] General function prediction only	-	-	2630.78	2389.49	2252.36	1251.24	1195.28	1274.57	55.63	57.15	60.8	33.02	37.38	34.05	2424.21	1240.36	57.86	34.8167	0.732788	0.732788	0.000382687	0.0310311	no
comp9819_c0	comp9819_c0_seq1	4721	4721	-	-	-	-	-	-	866.05	828	827	1511.01	1239.28	1546.83	4.16	4.5	5.07	9.05	8.8	9.38	840.35	1432.37	4.57667	9.07667	-0.987865	0.987865	0.000382233	0.0310311	no
comp8502_c0	comp8502_c0_seq1,comp8502_c0_seq2	2332	2227.81	Q5PQN1	E3 ubiquitin-protein ligase HERC2	GO:0005829(cytosol);GO:0004842(ubiquitin-protein ligase activity);GO:0030154(cell differentiation);GO:0042787(protein ubiquitination involved in ubiquitin-dependent protein catabolic process);GO:0007283(spermatogenesis)	[S] Function unknown	K10595	ko04120(Ubiquitin mediated proteolysis)	1997.08	1946.44	1509	2729.51	2450.46	2614.83	20.78	22.87	19.97	35.16	37.42	34.2	1817.51	2598.27	21.2067	35.5933	-0.747089	0.747089	0.000384939	0.0310311	no
comp2498_c0	comp2498_c0_seq1	3434	3434	Q9LN69	-	GO:0005488(binding)	[R] General function prediction only	-	-	1062.9	896.27	828.24	1080.86	891	1059.37	7.06	6.73	7.02	8.95	8.75	8.89	929.137	1010.41	6.93667	8.86333	-0.353607	0.353607	0.000376214	0.0310311	no
comp4325_c0	comp4325_c0_seq1,comp4325_c0_seq2	1103	1101.97	O14155	RalA-binding protein 1	GO:0005829(cytosol);GO:0005634(nucleus);GO:0045132(meiotic chromosome segregation)	[S] Function unknown	K08773	ko05200(Pathways in cancer);ko05212(Pancreatic cancer)	7591.42	7031.47	6152.51	4402.12	3786.35	4496.72	164.74	172.61	170.39	119.35	121.68	123.46	6925.13	4228.4	169.247	121.497	0.478211	0.478211	0.000387822	0.0310414	no
comp14501_c0	comp14501_c0_seq1,comp14501_c0_seq10,comp14501_c0_seq11,comp14501_c0_seq2,comp14501_c0_seq3,comp14501_c0_seq4,comp14501_c0_seq5,comp14501_c0_seq6,comp14501_c0_seq7,comp14501_c0_seq8,comp14501_c0_seq9	3428	1917.04	Q9LT25	-	-	[K] Transcription	-	-	1667.47	1213.96	1362.37	3032.3	2503.46	2670.22	22.51	18.23	20.65	40.91	41.16	38.51	1414.6	2735.33	20.4633	40.1933	-0.973915	0.973915	0.000399906	0.031547	no
comp12818_c0	comp12818_c0_seq1,comp12818_c0_seq2,comp12818_c0_seq3,comp12818_c0_seq4,comp12818_c0_seq5,comp12818_c0_seq6,comp12818_c0_seq7	3171	2375.2	Q8K370	acyl-CoA dehydrogenase	GO:0005739(mitochondrion);GO:0003995(acyl-CoA dehydrogenase activity);GO:0050660(flavin adenine dinucleotide binding);GO:0016787(hydrolase activity);GO:0016772(transferase activity, transferring phosphorus-containing groups)	[R] General function prediction only	K00249	ko00071(Fatty acid metabolism);ko00280(Valine, leucine and isoleucine degradation);ko00410(beta-Alanine metabolism);ko00640(Propanoate metabolism);ko03320(PPAR signaling pathway)	1223.83	945.92	801.95	1682.54	1297.89	1667.56	12.12	10.42	10.13	20.19	19.34	21.03	990.567	1549.33	10.89	20.1867	-0.890399	0.890399	0.000402	0.0315784	no
comp17745_c0	comp17745_c0_seq1	2166	2166	Q9SRT0	-	GO:0005634(nucleus);GO:0005886(plasma membrane);GO:0000151(ubiquitin ligase complex);GO:0070696(transmembrane receptor protein serine/threonine kinase binding);GO:0004842(ubiquitin-protein ligase activity);GO:0009738(abscisic acid mediated signaling pathw	[S] Function unknown	-	-	9090.99	8182.97	7605.49	5272.23	4584.17	4991.68	96.95	98.7	103.53	70.16	72.3	67.26	8293.15	4949.36	99.7267	69.9067	0.512549	0.512549	0.000411365	0.0318509	no
comp23756_c0	comp23756_c0_seq1	1435	1435	Q9ZPE4	-	GO:0005634(nucleus);GO:0005515(protein binding);GO:0010629(negative regulation of gene expression);GO:0010608(posttranscriptional regulation of gene expression);GO:0009737(response to abscisic acid stimulus)	[R] General function prediction only	-	-	1211.1	1050.06	960.15	763.76	670.64	792.96	19.85	19.47	20.09	15.62	16.26	16.42	1073.77	742.453	19.8033	16.1	0.298683	0.298683	0.000414589	0.031909	no
comp8523_c0	comp8523_c0_seq1,comp8523_c0_seq2	2700	2621.42	Q0GZS3	UDP-sugar pyrophosphorylase	GO:0051748(UTP-monosaccharide-1-phosphate uridylyltransferase activity)	[M] Cell wall/membrane/envelope biogenesis	K12447	ko00520(Amino sugar and nucleotide sugar metabolism)	3083.52	2981.78	2473.82	3791.81	3235.59	4034.68	26.93	29.55	27.6	41.58	41.89	44.7	2846.37	3687.36	28.0267	42.7233	-0.608224	0.608224	0.000416645	0.0319279	no
comp4162_c1	comp4162_c1_seq1	688	688	Q9SUT9	-	GO:0071782(endoplasmic reticulum tubular network);GO:0071458(integral to cytosolic side of endoplasmic reticulum membrane);GO:0005886(plasma membrane);GO:0071786(endoplasmic reticulum tubular network organization)	[U] Intracellular trafficking, secretion, and vesicular transport	-	-	6538.98	5771.54	5581.88	2836.49	2156.89	2826.4	237.59	237.2	258.88	128.6	115.91	129.75	5964.13	2606.59	244.557	124.753	0.97109	0.97109	0.000421307	0.0321001	no
comp36616_c0	comp36616_c0_seq1	1501	1501	-	-	-	[L] Replication, recombination and repair	-	-	445	397.22	339.19	295.02	248	299.73	6.96	7.02	6.77	5.76	5.73	5.92	393.803	280.917	6.91667	5.80333	0.253195	0.253195	0.000424481	0.0321347	no
comp5768_c0	comp5768_c0_seq1	1030	1030	O14218	-	GO:0005829(cytosol);GO:0005634(nucleus);GO:0004864(protein phosphatase inhibitor activity);GO:0006470(protein dephosphorylation)	[S] Function unknown	-	-	1035.09	901.7	850.48	574.19	522.85	557.4	24.15	23.8	25.33	16.72	18.05	16.43	929.09	551.48	24.4267	17.0667	0.517276	0.517276	0.000426723	0.0321522	no
comp19726_c0	comp19726_c0_seq1	2389	2389	Q8TC07	-	GO:0005737(cytoplasm);GO:0005515(protein binding);GO:0005097(Rab GTPase activator activity)	[T] Signal transduction mechanisms	-	-	2107.52	1935.02	1795.86	2535.95	2305.08	2569.55	20.31	21.09	22.09	30.49	32.85	31.29	1946.13	2470.19	21.1633	31.5433	-0.575768	0.575768	0.000428159	0.0321593	no
comp6302_c0	comp6302_c0_seq1	1875	1875	-	-	-	-	-	-	1674	1460.41	1270.25	655.3	521.52	707.02	20.74	20.46	20.08	10.13	9.55	11.07	1468.22	627.947	20.4267	10.25	0.99483	0.99483	0.000427592	0.0321593	no
comp19930_c0	comp19930_c0_seq1	1816	1816	Q8L3W1	-	GO:0005654(nucleoplasm);GO:0003677(DNA binding);GO:0009909(regulation of flower development);GO:0006355(regulation of transcription, DNA-dependent);GO:0006351(transcription, DNA-dependent);GO:0010048(vernalization response)	-	-	-	4241.86	4095.72	3454.38	2209.29	1591.96	1868.99	54.32	59.33	56.47	35.3	30.15	30.24	3930.65	1890.08	56.7067	31.8967	0.830113	0.830113	0.000428826	0.0321593	no
comp20250_c0	comp20250_c0_seq1	2756	2756	Q9XI07	SWI/SNF related-matrix-associated actin-dependent regulator of chromatin subfamily C	GO:0005634(nucleus);GO:0003677(DNA binding);GO:0005515(protein binding);GO:0016568(chromatin modification);GO:0007275(multicellular organismal development);GO:0006355(regulation of transcription, DNA-dependent);GO:0006351(transcription, DNA-dependent)	[B] Chromatin structure and dynamics	K11649	-	1786.78	1622.32	1283.06	2261.88	2098.03	2365.33	14.86	15.26	13.62	23.48	25.81	24.86	1564.05	2241.75	14.58	24.7167	-0.761493	0.761493	0.000438963	0.0323958	no
comp15893_c0	comp15893_c0_seq1,comp15893_c0_seq10,comp15893_c0_seq11,comp15893_c0_seq12,comp15893_c0_seq13,comp15893_c0_seq14,comp15893_c0_seq15,comp15893_c0_seq16,comp15893_c0_seq17,comp15893_c0_seq18,comp15893_c0_seq19,comp15893_c0_seq2,comp15893_c0_seq20,comp15893_	4416	2347.23	Q9SVP7	-	GO:0005488(binding)	[R] General function prediction only	-	-	2664.67	2475.74	2349.79	3991.6	3529.97	3880.33	31.32	33.16	35.79	49.88	53.39	53.25	2496.73	3800.63	33.4233	52.1733	-0.642457	0.642457	0.000446401	0.0327107	no
comp12985_c1	comp12985_c1_seq1,comp12985_c1_seq2	4566	2277.99	Q8RY73	-	GO:0009507(chloroplast);GO:0005829(cytosol);GO:0046872(metal ion binding);GO:0000166(nucleotide binding)	-	-	-	2708.99	2197.56	1842.01	3327.02	2744.5	3139.73	27.63	25.36	23.92	43.84	42.55	41.38	2249.52	3070.42	25.6367	42.59	-0.732306	0.732306	0.00045247	0.0328569	no
comp18825_c0	comp18825_c0_seq1	1042	1042	A0KF23	large subunit ribosomal protein L23	GO:0005840(ribosome);GO:0000166(nucleotide binding);GO:0019843(rRNA binding);GO:0003735(structural constituent of ribosome);GO:0006412(translation)	[J] Translation, ribosomal structure and biogenesis	K02892	ko03010(Ribosome)	3740.67	3044.75	2931.37	1645.74	1545.05	1664.71	86.21	79.37	86.24	47.33	52.66	48.47	3238.93	1618.5	83.94	49.4867	0.762319	0.762319	0.000449807	0.0328569	no
comp2730_c0	comp2730_c0_seq1,comp2730_c0_seq2	5059	3289.61	Q9ATY5	DNA excision repair protein ERCC-5	GO:0005634(nucleus);GO:0004519(endonuclease activity);GO:0046872(metal ion binding);GO:0005515(protein binding);GO:0003697(single-stranded DNA binding);GO:0010213(non-photoreactive DNA repair);GO:0006289(nucleotide-excision repair);GO:0009408(response to	[L] Replication, recombination and repair	K10846	ko03420(Nucleotide excision repair)	782.34	616.36	507.99	1444	1168.62	1306.8	7.66	7.08	6.31	13.71	12.41	12.66	635.563	1306.47	7.01667	12.9267	-0.881493	0.881493	0.000450888	0.0328569	no
comp29600_c0	comp29600_c0_seq1	1131	1131	-	-	-	-	-	-	462.44	439	347.75	173.68	164	201	9.76	10.48	9.37	4.57	5.12	5.36	416.397	179.56	9.87	5.01667	0.976321	0.976321	0.000455309	0.0328617	no
comp13223_c0	comp13223_c0_seq1	2210	2210	Q84T03	-	GO:0005524(ATP binding);GO:0008026(ATP-dependent helicase activity);GO:0003723(RNA binding)	[A] RNA processing and modification	K01529	-	1211.95	1198.77	1009.9	1498.76	1237.72	1551.68	12.66	14.16	13.46	19.53	19.12	20.48	1140.21	1429.39	13.4267	19.71	-0.553827	0.553827	0.000457493	0.0329107	no
comp12447_c0	comp12447_c0_seq1,comp12447_c0_seq2	3800	3787.3	-	-	-	[U] Intracellular trafficking, secretion, and vesicular transport	-	-	1353.15	1373.02	1183.99	1924.69	1550.5	1936.01	8.13	9.35	9.08	14.43	13.77	14.69	1303.39	1803.73	8.85333	14.2967	-0.691386	0.691386	0.000459641	0.0329584	no
comp15185_c0	comp15185_c0_seq1,comp15185_c0_seq10,comp15185_c0_seq11,comp15185_c0_seq12,comp15185_c0_seq2,comp15185_c0_seq3,comp15185_c0_seq4,comp15185_c0_seq5,comp15185_c0_seq6,comp15185_c0_seq7,comp15185_c0_seq8,comp15185_c0_seq9	2260	1991.88	-	-	-	-	-	-	373	331	344.01	594.81	521.28	539.46	4.37	4.37	5.12	8.57	8.91	7.99	349.337	551.85	4.62	8.49	-0.877872	0.877872	0.000469433	0.0332314	no
comp13079_c0	comp13079_c0_seq1,comp13079_c0_seq2,comp13079_c0_seq3,comp13079_c0_seq4,comp13079_c0_seq5,comp13079_c0_seq6	2679	1903.92	Q5MAU8	-	GO:0005576(extracellular region);GO:0003993(acid phosphatase activity);GO:0046872(metal ion binding)	[G] Carbohydrate transport and metabolism	-	-	538.89	506.49	407.75	866.36	754.09	838.43	7.57	8.51	7.27	15.89	14.33	14.51	484.377	819.627	7.78333	14.91	-0.93782	0.93782	0.000474525	0.03332	no
comp20648_c0	comp20648_c0_seq1	2089	2089	Q9SG92	thioredoxin 1	-	-	K03671	-	2990.65	2465.01	2117.12	1213.87	1193.7	1242.33	33.11	30.87	29.92	16.77	19.55	17.38	2524.26	1216.63	31.3	17.9	0.806203	0.806203	0.000483874	0.03332	no
comp20315_c0	comp20315_c0_seq1	1353	1353	-	-	-	[O] Posttranslational modification, protein turnover, chaperones	-	-	2349.27	2234.97	1801.63	1067.14	941.62	979.02	40.98	44.09	40.11	23.23	24.29	21.58	2128.62	995.927	41.7267	23.0333	0.857246	0.857246	0.000483448	0.03332	no
comp4694_c1	comp4694_c1_seq1	2537	2537	-	-	-	-	-	-	1147.1	1086.56	1015.86	1766.75	1642.12	1895.65	10.39	11.13	11.75	19.97	22	21.69	1083.17	1768.17	11.09	21.22	-0.936165	0.936165	0.000476643	0.03332	no
comp18246_c0	comp18246_c0_seq1	2444	2444	Q9C658	heat shock transcription factor, other eukaryote	-	[U] Intracellular trafficking, secretion, and vesicular transport	K09419	-	5399.82	4670.41	4465.86	6747.46	5332.77	6251.46	50.83	49.73	53.66	79.25	74.24	74.35	4845.36	6110.56	51.4067	75.9467	-0.563031	0.563031	0.000474781	0.03332	no
comp19729_c0	comp19729_c0_seq1	1043	1043	Q93V72	-	GO:0031225(anchored to membrane);GO:0005886(plasma membrane);GO:0009506(plasmodesma)	-	-	-	3931.47	3431.82	3184.2	2001.01	1605.74	2122.52	90.51	89.37	93.58	57.48	54.68	61.74	3515.83	1909.76	91.1533	57.9667	0.653072	0.653072	0.000483277	0.03332	no
comp20499_c0	comp20499_c0_seq1	2208	2208	Q84K00	-	GO:0005737(cytoplasm);GO:0005634(nucleus);GO:0003677(DNA binding);GO:0045893(positive regulation of transcription, DNA-dependent);GO:0009962(regulation of flavonoid biosynthetic process);GO:0009644(response to high light intensity);GO:0006351(transcriptio	-	-	-	2484.29	1948.61	1914.95	3021.56	2422.87	2774.68	25.97	23.04	25.55	39.42	37.46	36.65	2115.95	2739.7	24.8533	37.8433	-0.6066	0.6066	0.000482088	0.03332	no
comp13501_c0	comp13501_c0_seq1,comp13501_c0_seq2,comp13501_c0_seq3,comp13501_c0_seq4,comp13501_c0_seq5,comp13501_c0_seq6,comp13501_c0_seq7,comp13501_c0_seq8,comp13501_c0_seq9	1951	1561.75	-	-	-	-	-	-	2200.59	2070.79	1631.02	3669.28	3281.5	3412.74	34.06	36.28	32.74	64.47	68.71	62.6	1967.47	3454.51	34.36	65.26	-0.925469	0.925469	0.000481172	0.03332	no
comp16464_c1	comp16464_c1_seq1	3097	3097	Q5AU50	SNW domain-containing protein 1	GO:0005681(spliceosomal complex);GO:0000398(nuclear mRNA splicing, via spliceosome)	[A] RNA processing and modification ;[B] Chromatin structure and dynamics	K06063	ko03040(Spliceosome);ko04330(Notch signaling pathway)	3831.54	3099.01	2796.72	4522.85	3920.24	4503.87	28.28	25.87	26.35	41.65	42.79	42	3242.42	4315.65	26.8333	42.1467	-0.651392	0.651392	0.000484597	0.0333219	no
comp49361_c0	comp49361_c0_seq1	1582	1582	-	-	-	-	-	-	272.12	252	208.99	157	140.19	152	4.03	4.22	3.95	2.9	3.07	2.84	244.37	149.73	4.06667	2.93667	0.469667	0.469667	0.000485435	0.0333318	no
comp15953_c1	comp15953_c1_seq1,comp15953_c1_seq10,comp15953_c1_seq11,comp15953_c1_seq12,comp15953_c1_seq13,comp15953_c1_seq14,comp15953_c1_seq15,comp15953_c1_seq16,comp15953_c1_seq17,comp15953_c1_seq18,comp15953_c1_seq19,comp15953_c1_seq2,comp15953_c1_seq20,comp15953_	4205	2173.18	Q2MHE4	sterile alpha motif and leucine zipper containing kinase AZK	GO:0005524(ATP binding);GO:0004674(protein serine/threonine kinase activity);GO:0010119(regulation of stomatal movement)	[T] Signal transduction mechanisms	K04424	ko04010(MAPK signaling pathway);ko04530(Tight junction)	2315.53	2066.89	2177.73	4064.15	3092.07	3791.52	24.75	24.35	29.78	53.08	48.35	51.51	2186.72	3649.25	26.2933	50.98	-0.955234	0.955234	0.000494145	0.0336033	no
comp23956_c0	comp23956_c0_seq1	1070	1070	G5E8K5	ankyrin	-	[R] General function prediction only	K10380	-	817.75	773.03	648.62	500	384.95	468.05	18.32	19.58	18.54	13.97	12.75	13.25	746.467	451	18.8133	13.3233	0.4978	0.4978	0.000496448	0.0336033	no
comp16738_c2	comp16738_c2_seq1,comp16738_c2_seq10,comp16738_c2_seq11,comp16738_c2_seq12,comp16738_c2_seq13,comp16738_c2_seq14,comp16738_c2_seq15,comp16738_c2_seq16,comp16738_c2_seq17,comp16738_c2_seq18,comp16738_c2_seq19,comp16738_c2_seq2,comp16738_c2_seq20,comp16738_	2667	1456.61	Q9SV01	-	-	-	-	-	741.29	679.17	528.86	1047.31	805.04	1027.08	12.41	13.74	11.95	21.11	19.76	20.53	649.773	959.81	12.7	20.4667	-0.688448	0.688448	0.000498793	0.033671	no
comp15387_c0	comp15387_c0_seq1,comp15387_c0_seq2,comp15387_c0_seq3	1831	1667.29	-	-	-	-	-	-	1569.2	1469.89	996.01	2094.48	2108.36	2144.08	22.71	22.64	19.03	38.08	42.05	38.46	1345.03	2115.64	21.46	39.53	-0.881298	0.881298	0.000504803	0.0338387	no
comp15975_c0	comp15975_c0_seq1,comp15975_c0_seq10,comp15975_c0_seq11,comp15975_c0_seq12,comp15975_c0_seq13,comp15975_c0_seq14,comp15975_c0_seq15,comp15975_c0_seq16,comp15975_c0_seq17,comp15975_c0_seq18,comp15975_c0_seq2,comp15975_c0_seq3,comp15975_c0_seq4,comp15975_c0	5803	2596.01	Q8RYC8	WNK lysine deficient protein kinase	GO:0005634(nucleus);GO:0003677(DNA binding);GO:0046983(protein dimerization activity);GO:0009734(auxin mediated signaling pathway);GO:0010386(lateral root primordium development);GO:0048366(leaf development);GO:0006355(regulation of transcription, DNA-dep	-	K08867	-	3272.95	3205.25	2744.28	4718.49	4101.84	4915.52	32.29	35.16	36.48	51.57	54.13	56.37	3074.16	4578.62	34.6433	54.0233	-0.641005	0.641005	0.000510151	0.033913	no
comp22187_c0	comp22187_c0_seq1	3546	3546	O43847	nardilysin	GO:0009986(cell surface);GO:0005829(cytosol);GO:0048408(epidermal growth factor binding);GO:0004222(metalloendopeptidase activity);GO:0008270(zinc ion binding);GO:0016477(cell migration);GO:0008283(cell proliferation);GO:0007528(neuromuscular junction dev	[O] Posttranslational modification, protein turnover, chaperones	K01411	-	1611.16	1492.43	1487.54	2567.99	2158.3	2298.48	10.35	10.85	12.2	20.59	20.51	18.66	1530.38	2341.59	11.1333	19.92	-0.839332	0.839332	0.000511404	0.0339493	no
comp19282_c0	comp19282_c0_seq1	829	829	-	-	-	[S] Function unknown	-	-	2540.02	2085.3	2018.22	1272.85	995.43	1136.35	75.05	69.7	76.12	46.93	43.5	42.42	2214.51	1134.88	73.6233	44.2833	0.733399	0.733399	0.000514397	0.0340538	no
comp19129_c0	comp19129_c0_seq1	2330	2330	Q9M7M1	-	GO:0005789(endoplasmic reticulum membrane);GO:0016021(integral to membrane);GO:0005524(ATP binding);GO:0046872(metal ion binding);GO:0004872(receptor activity);GO:0000156(two-component response regulator activity);GO:0000155(two-component sensor activity)	[T] Signal transduction mechanisms	K00936	-	6927.81	6171.1	5992.03	2774.73	2872.39	2877.11	68.51	69.03	75.64	34.24	42.01	35.95	6363.65	2841.41	71.06	37.4	0.925999	0.925999	0.000516229	0.0341196	no
comp8541_c0	comp8541_c0_seq1	2477	2477	O80612	apyrase	-	[F] Nucleotide transport and metabolism	K01510	ko00230(Purine metabolism);ko00240(Pyrimidine metabolism)	3980.26	3253.3	3146.58	5904.29	5432.06	5917.18	36.95	34.16	37.29	68.4	74.59	69.41	3460.05	5751.18	36.1333	70.8	-0.970419	0.970419	0.000526618	0.034624	no
comp3876_c0	comp3876_c0_seq1,comp3876_c0_seq2	4280	4263.91	Q9FPR3	sterile alpha motif and leucine zipper containing kinase AZK	-	[T] Signal transduction mechanisms	K04424	ko04010(MAPK signaling pathway);ko04530(Tight junction)	2221.51	1788.02	1858.25	2805.71	2547.95	2834.52	11.83	10.78	12.64	18.64	20.05	19.06	1955.93	2729.39	11.75	19.25	-0.712198	0.712198	0.000531359	0.0346717	no
comp13059_c0	comp13059_c0_seq1,comp13059_c0_seq2	1638	1395.37	-	-	-	-	-	-	412	471.11	382.03	626.94	543.96	604	7.85	9.19	8.77	13.88	15.07	13.89	421.713	591.633	8.60333	14.28	-0.731028	0.731028	0.000529925	0.0346717	no
comp21908_c0	comp21908_c0_seq1	2284	2284	-	-	-	[K] Transcription	-	-	1498.98	1183.83	1031.61	2009.3	1701.89	1922.98	15.13	13.52	13.29	25.31	25.41	24.53	1238.14	1878.06	13.98	25.0833	-0.843365	0.843365	0.000536637	0.0348423	no
comp21015_c0	comp21015_c0_seq1	867	867	-	-	-	[K] Transcription	-	-	1327.18	1250.59	1117.76	568.36	558.54	668.37	37.34	39.8	40.14	19.95	23.24	23.76	1231.84	598.423	39.0933	22.3167	0.808801	0.808801	0.000541204	0.0350548	no
comp16966_c2	comp16966_c2_seq1,comp16966_c2_seq10,comp16966_c2_seq11,comp16966_c2_seq12,comp16966_c2_seq13,comp16966_c2_seq14,comp16966_c2_seq15,comp16966_c2_seq16,comp16966_c2_seq17,comp16966_c2_seq18,comp16966_c2_seq19,comp16966_c2_seq2,comp16966_c2_seq20,comp16966_	5164	2467.37	Q05654	putative transposase	GO:0005634(nucleus);GO:0004190(aspartic-type endopeptidase activity);GO:0003677(DNA binding);GO:0003723(RNA binding);GO:0003964(RNA-directed DNA polymerase activity);GO:0033554(cellular response to stress);GO:0015074(DNA integration);GO:0006508(proteolysi	[R] General function prediction only	K07497	-	3167.54	2891.33	2501.36	9172.39	6736.46	6726.09	49.36	48.15	54.8	82.07	79.38	76.81	2853.41	7544.98	50.77	79.42	-0.645526	0.645526	0.000546093	0.0351945	no
comp21149_c0	comp21149_c0_seq1	1011	1011	P42856	Hit-like protein involved in cell-cycle regulation	-	[T] Signal transduction mechanisms	K02503	-	1187.02	1140.98	1033.66	520	520.77	573.98	28.26	30.73	31.41	15.45	18.34	17.27	1120.55	538.25	30.1333	17.02	0.824129	0.824129	0.000547027	0.0351945	no
comp20479_c0	comp20479_c0_seq1	1467	1467	-	-	-	[S] Function unknown	-	-	3594.48	3293.36	2976.28	1844.65	1554.87	2035.05	57.57	59.66	60.84	36.86	36.83	41.18	3288.04	1811.52	59.3567	38.29	0.632442	0.632442	0.000575319	0.0361351	no
comp13491_c0	comp13491_c0_seq1,comp13491_c0_seq2	1872	1675.99	Q944H5	-	-	[C] Energy production and conversion	-	-	576.1	476	490.78	923.05	685.41	886.65	7.91	7.24	8.71	15.27	13.65	14.93	514.293	831.703	7.95333	14.6167	-0.877983	0.877983	0.000573105	0.0361351	no
comp18086_c0	comp18086_c0_seq1	1156	1156	Q7SXW4	-	GO:0016021(integral to membrane);GO:0030140(trans-Golgi network transport vesicle);GO:0045494(photoreceptor cell maintenance);GO:0060041(retina development in camera-type eye)	[S] Function unknown	-	-	8184.04	7825.53	7132.77	3720.62	3347.67	4276.59	168.74	182.51	187.72	95.72	102.09	111.41	7714.11	3781.63	179.657	103.073	0.801571	0.801571	0.000577384	0.0361351	no
comp15445_c1	comp15445_c1_seq1,comp15445_c1_seq2,comp15445_c1_seq3,comp15445_c1_seq4,comp15445_c1_seq5,comp15445_c1_seq6,comp15445_c1_seq7,comp15445_c1_seq8	1939	1778.66	-	-	-	-	-	-	562.02	612.32	463.09	1023.01	859.09	948.78	7.42	9.14	7.82	16.56	16.47	15.59	545.81	943.627	8.12667	16.2067	-0.995852	0.995852	0.000587067	0.0364043	no
comp20104_c0	comp20104_c0_seq1	1206	1206	Q9SEL5	vesicle transport through interaction with t-SNAREs 1	GO:0016021(integral to membrane);GO:0031902(late endosome membrane);GO:0005886(plasma membrane);GO:0005802(trans-Golgi network);GO:0005483(soluble NSF attachment protein activity);GO:0006623(protein targeting to vacuole);GO:0016192(vesicle-mediated transp	[U] Intracellular trafficking, secretion, and vesicular transport	K08493	ko04130(SNARE interactions in vesicular transport)	4541.89	3624.09	3460.99	1864.24	1785.08	1996.16	89.51	80.79	87.07	45.84	52.03	49.71	3875.66	1881.83	85.79	49.1933	0.802347	0.802347	0.000590497	0.0364568	no
comp45300_c0	comp45300_c0_seq1	644	644	-	-	-	-	-	-	106	90.58	79	150.43	121	139	4.15	4.01	3.95	7.35	7	6.87	91.86	136.81	4.03667	7.07333	-0.809226	0.809226	0.000590739	0.0364568	no
comp12194_c0	comp12194_c0_seq1,comp12194_c0_seq2,comp12194_c0_seq3,comp12194_c0_seq4	5335	4082.2	Q9S7I0	-	GO:0009507(chloroplast);GO:0005886(plasma membrane);GO:0008251(tRNA-specific adenosine deaminase activity);GO:0008270(zinc ion binding);GO:0002100(tRNA wobble adenosine to inosine editing)	[F] Nucleotide transport and metabolism	K01500	ko00791(Atrazine degradation)	666.72	618.94	382.79	832.08	872.01	871.84	4.16	4.36	3.52	7.47	7.79	8.02	556.15	858.643	4.01333	7.76	-0.951256	0.951256	0.00060848	0.0367099	no
comp10436_c0	comp10436_c0_seq1	317	317	-	-	-	-	-	-	41	38	31	18.55	15	19	3.76	3.95	3.63	2.12	2.04	2.2	36.6667	17.5167	3.78	2.12	0.834322	0.834322	0.00060408	0.0367099	no
comp18555_c0	comp18555_c0_seq1	1712	1712	A7RWP6	translation initiation factor eIF-3 subunit 6	GO:0005737(cytoplasm);GO:0003743(translation initiation factor activity)	[J] Translation, ribosomal structure and biogenesis	K03250	-	6046.27	5729.35	4937.64	3414.31	3039.02	3384.73	82.35	88.26	85.84	58.03	61.22	58.25	5571.09	3279.35	85.4833	59.1667	0.530859	0.530859	0.00060279	0.0367099	no
comp11922_c1	comp11922_c1_seq1	2328	2328	O80983	ATP-dependent metalloprotease	GO:0016021(integral to membrane);GO:0005743(mitochondrial inner membrane);GO:0009536(plastid);GO:0005524(ATP binding);GO:0046872(metal ion binding);GO:0004222(metalloendopeptidase activity);GO:0017111(nucleoside-triphosphatase activity);GO:0030163(protein	[O] Posttranslational modification, protein turnover, chaperones	K08955	-	961.83	792.04	777.36	1472.55	1143.14	1464.92	9.52	8.87	9.82	18.19	16.73	18.32	843.743	1360.2	9.40333	17.7467	-0.916304	0.916304	0.000606944	0.0367099	no
comp4481_c0	comp4481_c0_seq1,comp4481_c0_seq2	4040	2998.67	-	triacylglycerol lipase	-	[I] Lipid transport and metabolism	K01046	ko00561(Glycerolipid metabolism)	9958.98	8072.3	6775.24	11400.9	8992.58	11262.2	75.07	69.17	66.96	104.64	98.37	104.27	8268.84	10551.9	70.4	102.427	-0.540944	0.540944	0.00061932	0.0370173	no
comp8475_c0	comp8475_c0_seq1,comp8475_c0_seq2	1530	1524.91	Q99MB4	cobalamin biosynthesis protein CobW	GO:0005524(ATP binding)	[H] Coenzyme transport and metabolism	K02234	ko00860(Porphyrin and chlorophyll metabolism)	1166.8	1027.35	1012.03	1519.64	1264.39	1540.72	17.93	17.87	19.86	29.22	28.81	30.01	1068.73	1441.58	18.5533	29.3467	-0.661518	0.661518	0.000622137	0.0370846	no
comp2584_c0	comp2584_c0_seq1	1921	1921	Q54DY9	mitochondrial chaperone BCS1	GO:0016021(integral to membrane);GO:0005743(mitochondrial inner membrane);GO:0005524(ATP binding);GO:0016887(ATPase activity);GO:0051131(chaperone-mediated protein complex assembly)	[O] Posttranslational modification, protein turnover, chaperones	K08900	-	143	136	136.57	234.06	180.26	234.83	1.73	1.86	2.11	3.53	3.22	3.58	138.523	216.383	1.9	3.44333	-0.857806	0.857806	0.000622765	0.0370846	no
comp19828_c0	comp19828_c0_seq1	1444	1444	Q9FHK0	-	-	-	-	-	2976.16	2709.03	2209.61	1573.9	1225.59	1505.31	48.46	49.9	45.93	31.98	29.52	30.97	2631.6	1434.93	48.0967	30.8233	0.641914	0.641914	0.000626595	0.0371744	no
comp11024_c0	comp11024_c0_seq1,comp11024_c0_seq2,comp11024_c0_seq3,comp11024_c0_seq4	2440	2300.38	Q03250	small subunit ribosomal protein S19	GO:0009507(chloroplast);GO:0005829(cytosol);GO:0005634(nucleus);GO:0005777(peroxisome);GO:0009506(plasmodesma);GO:0003690(double-stranded DNA binding);GO:0000166(nucleotide binding);GO:0003723(RNA binding);GO:0003697(single-stranded DNA binding);GO:000762	[R] General function prediction only	K02965	ko03010(Ribosome)	5315.32	4660.51	4216.54	2696.78	2484.11	2752.49	53.5	53	54.34	33.54	36.68	34.6	4730.79	2644.46	53.6133	34.94	0.617712	0.617712	0.000628971	0.0372233	no
comp25281_c0	comp25281_c0_seq1	2763	2763	Q80ZK9	WD and tetratricopeptide repeats protein 1	GO:0005829(cytosol);GO:0005634(nucleus);GO:0004857(enzyme inhibitor activity);GO:0042393(histone binding);GO:0042826(histone deacetylase binding);GO:0055082(cellular chemical homeostasis);GO:0032869(cellular response to insulin stimulus);GO:0006006(glucos	[R] General function prediction only	K11807	-	822.86	734.54	700.6	1060.19	833.77	973.04	6.83	6.89	7.42	10.98	10.23	10.2	752.667	955.667	7.04667	10.47	-0.571249	0.571249	0.00064638	0.0373851	no
comp14804_c0	comp14804_c0_seq1,comp14804_c0_seq2,comp14804_c0_seq3,comp14804_c0_seq4	2407	2183.92	P79741	-	GO:0005654(nucleoplasm);GO:0070545(PeBoW complex);GO:0030687(preribosome, large subunit precursor);GO:0008283(cell proliferation);GO:0000466(maturation of 5.8S rRNA from tricistronic rRNA transcript (SSU-rRNA, 5.8S rRNA, LSU-rRNA));GO:0000463(maturation o	[A] RNA processing and modification	-	-	1800.6	1622.63	1570.99	2271.67	2015.29	2522.55	18.87	19.38	20.62	32.21	30.81	33.78	1664.74	2269.84	19.6233	32.2667	-0.717474	0.717474	0.000670414	0.0373851	no
comp23086_c0	comp23086_c0_seq1	1938	1938	Q8LBL5	-	GO:0005737(cytoplasm);GO:0016874(ligase activity);GO:0008270(zinc ion binding)	[O] Posttranslational modification, protein turnover, chaperones	-	-	1336	1285.49	1033.27	692.48	495.39	658.14	15.99	17.4	15.79	10.34	8.77	9.95	1218.25	615.337	16.3933	9.68667	0.759037	0.759037	0.000651516	0.0373851	no
comp19488_c0	comp19488_c0_seq1	919	919	-	-	-	-	-	-	3482.87	2820.05	2790.68	1468.73	1125.71	1516.06	91.95	84.21	94.05	48.39	43.96	50.57	3031.2	1370.17	90.07	47.64	0.918873	0.918873	0.000654797	0.0373851	no
comp19851_c0	comp19851_c0_seq1	1104	1104	-	-	-	[K] Transcription	-	-	4138.08	3616.25	3106.46	1570.39	1296.62	1795.63	89.63	88.6	85.89	42.44	41.54	49.14	3620.26	1554.21	88.04	44.3733	0.988466	0.988466	0.000673955	0.0373851	no
comp19831_c0	comp19831_c0_seq1	5648	5648	Q8CFQ3	-	GO:0003723(RNA binding);GO:0006397(mRNA processing);GO:0008380(RNA splicing)	[L] Replication, recombination and repair	-	-	2635.49	2075.4	1830.79	3359.24	3067.47	3237.16	10.55	9.4	9.35	16.78	18.16	16.37	2180.56	3221.29	9.76667	17.1033	-0.808339	0.808339	0.000636415	0.0373851	no
comp2762_c0	comp2762_c0_seq1	749	749	-	-	-	-	-	-	605.05	604.95	521.77	278.97	200.08	292.04	20	22.62	22.01	11.51	9.78	12.2	577.257	257.03	21.5433	11.1633	0.948474	0.948474	0.000659865	0.0373851	no
comp20403_c0	comp20403_c0_seq1	1517	1517	-	endophilin-A	-	-	K11247	ko04144(Endocytosis)	3160.3	2762.67	2588.7	1540.17	1312.7	1729.02	48.86	48.31	51.09	29.71	30.02	33.77	2837.22	1527.3	49.42	31.1667	0.665091	0.665091	0.000682225	0.0374515	no
comp22404_c0	comp22404_c0_seq1	1711	1711	-	-	-	-	K01238	-	2718.38	2185.57	2113.6	1130.74	867.99	1022.83	37.05	33.69	36.77	19.23	17.5	17.61	2339.18	1007.19	35.8367	18.1133	0.984384	0.984384	0.000687293	0.0374643	no
comp19037_c0	comp19037_c0_seq1	1338	1338	-	carboxymethylenebutenolidase	-	[R] General function prediction only	K01061	ko00361(gamma-Hexachlorocyclohexane degradation);ko00364(Fluorobenzoate degradation);ko00627(1,4-Dichlorobenzene degradation)	4037.08	4007.68	3365.16	1692.11	1760.7	1903.13	71.25	80.01	75.81	37.27	45.96	42.44	3803.31	1785.31	75.69	41.89	0.853497	0.853497	0.000696617	0.0376352	no
comp13528_c0	comp13528_c0_seq1,comp13528_c0_seq2,comp13528_c0_seq3,comp13528_c0_seq4	1623	1418.38	Q8S8F8	-	GO:0005829(cytosol);GO:0051567(histone H3-K9 methylation);GO:0010482(regulation of epidermal cell division);GO:0048765(root hair cell differentiation);GO:0010026(trichome differentiation)	-	-	-	3654.89	2947.61	2826.83	4966.89	4197.33	4468.7	60.33	54.9	60.19	100.6	100.45	92.14	3143.11	4544.31	58.4733	97.73	-0.741023	0.741023	0.000699445	0.0376352	no
comp14348_c0	comp14348_c0_seq1,comp14348_c0_seq10,comp14348_c0_seq11,comp14348_c0_seq12,comp14348_c0_seq2,comp14348_c0_seq3,comp14348_c0_seq4,comp14348_c0_seq5,comp14348_c0_seq6,comp14348_c0_seq7,comp14348_c0_seq8,comp14348_c0_seq9	1940	1317.18	Q8GW19	prenyl protein peptidase	GO:0005789(endoplasmic reticulum membrane);GO:0016021(integral to membrane);GO:0004175(endopeptidase activity);GO:0080120(CAAX-box protein maturation);GO:0034613(cellular protein localization);GO:0016485(protein processing)	[O] Posttranslational modification, protein turnover, chaperones	K08658	-	511	434	403.04	760.02	608.59	690.81	9.72	9.02	9.59	16.82	16.26	15.4	449.347	686.473	9.44333	16.16	-0.775059	0.775059	0.000709508	0.0378373	no
comp22155_c0	comp22155_c0_seq1	919	919	-	-	-	-	-	-	1152.51	1008.1	841.08	463	473.39	485	30.43	30.1	28.34	15.25	18.48	16.18	1000.56	473.797	29.6233	16.6367	0.832368	0.832368	0.000714023	0.0379936	no
comp4889_c0	comp4889_c0_seq1,comp4889_c0_seq2	3980	3968.5	Q84W55	inositol-1,4,5-trisphosphate 5-phosphatase	GO:0046872(metal ion binding);GO:0004439(phosphatidylinositol-4,5-bisphosphate 5-phosphatase activity)	[U] Intracellular trafficking, secretion, and vesicular transport	K01106	ko00562(Inositol phosphate metabolism);ko04070(Phosphatidylinositol signaling system)	932.05	787.8	844.99	1350.13	1206.56	1509.99	5.34	5.11	6.18	9.65	10.22	10.93	854.947	1355.56	5.54333	10.2667	-0.889142	0.889142	0.000717038	0.0380248	no
comp22191_c0	comp22191_c0_seq1	2375	2375	Q9FFW5	-	GO:0016021(integral to membrane);GO:0005886(plasma membrane);GO:0005524(ATP binding);GO:0004674(protein serine/threonine kinase activity);GO:0005199(structural constituent of cell wall)	-	-	-	837.56	695.64	532.92	1049.81	943.23	1123	8.12	7.63	6.6	12.7	13.53	13.76	688.707	1038.68	7.45	13.33	-0.839364	0.839364	0.000719362	0.0380248	no
comp13248_c0	comp13248_c0_seq1,comp13248_c0_seq2,comp13248_c0_seq3,comp13248_c0_seq4	2649	1831.89	Q9Y2T2	AP-3 complex subunit mu	GO:0030131(clathrin adaptor complex);GO:0005794(Golgi apparatus);GO:0005764(lysosome);GO:0005515(protein binding);GO:0006622(protein targeting to lysosome);GO:0016192(vesicle-mediated transport)	[U] Intracellular trafficking, secretion, and vesicular transport	K12398	ko04142(Lysosome)	2725.17	2503.03	2230.8	1417.31	1347.01	1399.86	32.85	34.67	35.92	22.2	24.32	21.29	2486.33	1388.06	34.48	22.6033	0.609224	0.609224	0.000717234	0.0380248	no
comp25633_c0	comp25633_c0_seq1	1948	1948	Q9LZ72	-	GO:0016021(integral to membrane);GO:0016747(transferase activity, transferring acyl groups other than amino-acyl groups);GO:0006633(fatty acid biosynthetic process);GO:0009409(response to cold);GO:0009416(response to light stimulus)	-	-	-	197.86	182.92	130	297.03	231.99	285	2.36	2.46	1.98	4.41	4.08	4.29	170.26	271.34	2.26667	4.26	-0.910281	0.910281	0.000726877	0.0381281	no
comp4687_c0	comp4687_c0_seq1,comp4687_c0_seq2	3276	2942.17	Q86IX1	protein-serine/threonine kinase	GO:0005737(cytoplasm);GO:0005634(nucleus);GO:0005524(ATP binding);GO:0046872(metal ion binding);GO:0004674(protein serine/threonine kinase activity);GO:0006915(apoptosis);GO:0008283(cell proliferation);GO:0007165(signal transduction)	[T] Signal transduction mechanisms	K08286	-	1026.88	925.96	919.77	1423.44	1115.14	1440.13	8.03	8.21	9.18	13.76	12.77	14.09	957.537	1326.24	8.47333	13.54	-0.676226	0.676226	0.000723898	0.0381281	no
comp27904_c0	comp27904_c0_seq1	2855	2855	F4JSH1	apyrase	-	[F] Nucleotide transport and metabolism	K01510	ko00230(Purine metabolism);ko00240(Pyrimidine metabolism)	864.11	843.22	779	1137.65	1016.06	1091.97	6.93	7.65	7.98	11.39	12.06	11.07	828.777	1081.89	7.52	11.5067	-0.613665	0.613665	0.000736658	0.0382164	no
comp17134_c0	comp17134_c0_seq1	1153	1153	O48646	glutathione peroxidase	GO:0009507(chloroplast);GO:0005829(cytosol);GO:0005739(mitochondrion);GO:0005886(plasma membrane);GO:0004602(glutathione peroxidase activity);GO:0047066(phospholipid-hydroperoxide glutathione peroxidase activity);GO:0046686(response to cadmium ion);GO:000	[O] Posttranslational modification, protein turnover, chaperones	K00432	ko00480(Glutathione metabolism);ko00590(Arachidonic acid metabolism)	20002.1	18882.7	15164.1	9658.54	7877.29	10760.6	413.56	441.6	400.21	249.18	240.88	281.1	18016.3	9432.13	418.457	257.053	0.703011	0.703011	0.000733731	0.0382164	no
comp37680_c0	comp37680_c0_seq1	2795	2795	Q8L936	-	GO:0030136(clathrin-coated vesicle);GO:0005905(coated pit);GO:0005794(Golgi apparatus);GO:0005543(phospholipid binding);GO:0006897(endocytosis)	[T] Signal transduction mechanisms ;[U] Intracellular trafficking, secretion, and vesicular transport	-	-	233.45	197.27	217.5	390.09	338.57	349	1.91	1.83	2.28	3.99	4.11	3.62	216.073	359.22	2.00667	3.90667	-0.961137	0.961137	0.000730347	0.0382164	no
comp27591_c0	comp27591_c0_seq1	1493	1493	O82132	EREBP-like factor	GO:0005634(nucleus);GO:0003677(DNA binding);GO:0005515(protein binding);GO:0003700(sequence-specific DNA binding transcription factor activity);GO:0010286(heat acclimation);GO:0042542(response to hydrogen peroxide);GO:0010224(response to UV-B);GO:0009414(	-	K09286	-	923.58	794.57	750.96	382.83	384.14	384	14.52	14.13	15.07	7.51	8.93	7.63	823.037	383.657	14.5733	8.02333	0.861057	0.861057	0.000738018	0.0382164	no
comp5342_c1	comp5342_c1_seq1	783	783	P16577	ubiquitin-conjugating enzyme E2 H	GO:0005524(ATP binding);GO:0004842(ubiquitin-protein ligase activity)	[O] Posttranslational modification, protein turnover, chaperones	K10576	ko04120(Ubiquitin mediated proteolysis)	989	903	727.06	425.33	357.86	387.79	31.12	32.14	29.2	16.7	16.65	15.42	873.02	390.327	30.82	16.2567	0.922835	0.922835	0.000751339	0.0384064	no
comp9507_c0	comp9507_c0_seq1	3292	3292	-	enhancer of polycomb-like protein	-	-	K11322	-	1988.13	1454.9	1601.37	2850.58	2468.38	3017.45	13.78	11.41	14.17	24.66	25.31	26.43	1681.47	2778.8	13.12	25.4667	-0.956842	0.956842	0.0007538	0.0384431	no
comp16768_c0	comp16768_c0_seq1,comp16768_c0_seq2	3233	3010.05	Q9LTX2	-	GO:0005634(nucleus);GO:0019005(SCF ubiquitin ligase complex);GO:0010011(auxin binding);GO:0000822(inositol hexakisphosphate binding);GO:0009734(auxin mediated signaling pathway)	[R] General function prediction only	-	-	4198.72	4023.57	3085.71	4897.09	4458.77	4834.34	31.23	33.77	29.36	46.63	49.57	46.46	3769.33	4730.07	31.4533	47.5533	-0.596334	0.596334	0.000758853	0.038521	no
comp4407_c1	comp4407_c1_seq1	531	531	O24407	-	GO:0005634(nucleus);GO:0046983(protein dimerization activity);GO:0009734(auxin mediated signaling pathway);GO:0006355(regulation of transcription, DNA-dependent);GO:0006351(transcription, DNA-dependent)	-	-	-	256.4	240.51	206.25	136.53	99.74	133.14	12.52	13.28	12.85	8.32	7.2	8.21	234.387	123.137	12.8833	7.91	0.703756	0.703756	0.000768539	0.0385215	no
comp10857_c0	comp10857_c0_seq1,comp10857_c0_seq2	3395	3313.56	Q8LEZ4	IMP dehydrogenase	GO:0005739(mitochondrion)	[R] General function prediction only	K00088	ko00230(Purine metabolism);ko00983(Drug metabolism - other enzymes)	2687.66	2134.01	2226.09	3580.55	2880.62	3325.13	18.51	16.63	19.56	30.78	29.32	28.9	2349.25	3262.1	18.2333	29.6667	-0.702265	0.702265	0.000771324	0.0385229	no
comp12006_c0	comp12006_c0_seq1,comp12006_c0_seq2,comp12006_c0_seq3,comp12006_c0_seq4	3129	2577.54	Q9C810	-	GO:0005634(nucleus);GO:0008270(zinc ion binding);GO:0006355(regulation of transcription, DNA-dependent);GO:0006351(transcription, DNA-dependent)	[R] General function prediction only	-	-	2049.28	1734.2	1739.28	2504.03	2273.66	2432.44	18.44	17.7	19.89	27.49	29.6	27.19	1840.92	2403.38	18.6767	28.0933	-0.588991	0.588991	0.000786343	0.0387488	no
comp7084_c0	comp7084_c0_seq1,comp7084_c0_seq2	1463	870.56	-	-	-	-	-	-	189.06	159	153	105.16	115	144	6.67	6.09	6.3	3.21	3.62	3.97	167.02	121.387	6.35333	3.6	0.819517	0.819517	0.000784987	0.0387488	no
comp14750_c0	comp14750_c0_seq1,comp14750_c0_seq10,comp14750_c0_seq11,comp14750_c0_seq12,comp14750_c0_seq2,comp14750_c0_seq3,comp14750_c0_seq4,comp14750_c0_seq5,comp14750_c0_seq6,comp14750_c0_seq7,comp14750_c0_seq8,comp14750_c0_seq9	1994	1712.78	Q9LS39	-	GO:0005737(cytoplasm);GO:0005634(nucleus);GO:0046872(metal ion binding);GO:0004535(poly(A)-specific ribonuclease activity);GO:0003723(RNA binding);GO:0006355(regulation of transcription, DNA-dependent);GO:0006351(transcription, DNA-dependent)	[K] Transcription	-	-	311.04	317.79	304.39	483.2	443	486.38	4.26	4.95	5.24	8.11	8.89	8.28	311.073	470.86	4.81667	8.42667	-0.806927	0.806927	0.000788882	0.0387863	no
comp12540_c0	comp12540_c0_seq1,comp12540_c0_seq2	4700	3868.69	-	DNA polymerase phi subunit	-	[K] Transcription	K02331	-	3668.21	3004.68	2963.85	4592.47	4501.56	4842.25	20.81	19.3	20.81	33.28	36.52	35.45	3212.25	4645.43	20.3067	35.0833	-0.788832	0.788832	0.000790659	0.0387863	no
comp16730_c0	comp16730_c0_seq1,comp16730_c0_seq2,comp16730_c0_seq3,comp16730_c0_seq4,comp16730_c0_seq5	2598	2326.65	Q9LZ00	-	-	-	-	-	2594.44	2049.1	1853.02	2977.84	2234.2	2789.34	26.1	23.81	23.9	36.12	34.87	34.72	2165.52	2667.13	24.6033	35.2367	-0.518224	0.518224	0.000793425	0.0388158	no
comp19331_c0	comp19331_c0_seq1	1317	1317	Q9XGM1	V-type H+-transporting ATPase subunit D	GO:0000325(plant-type vacuole);GO:0005886(plasma membrane);GO:0033178(proton-transporting two-sector ATPase complex, catalytic domain);GO:0005774(vacuolar membrane);GO:0046961(proton-transporting ATPase activity, rotational mechanism);GO:0015991(ATP hydro	[C] Energy production and conversion	K02149	ko00190(Oxidative phosphorylation);ko04145(Phagosome);ko04966(Collecting duct acid secretion);ko05110(Vibrio cholerae infection);ko05120(Epithelial cell signaling in Helicobacter pylori infection)	3351.09	2913.48	2355.77	1403.62	1241.12	1595.02	60.14	59.15	53.97	31.43	32.95	36.17	2873.45	1413.25	57.7533	33.5167	0.785026	0.785026	0.000799248	0.0389054	no
comp4080_c0	comp4080_c0_seq1,comp4080_c0_seq2	1672	1658.45	Q8RXV3	protein phosphatase	GO:0005886(plasma membrane);GO:0008287(protein serine/threonine phosphatase complex);GO:0046872(metal ion binding);GO:0004722(protein serine/threonine phosphatase activity);GO:0042742(defense response to bacterium);GO:0044419(interspecies interaction betw	[T] Signal transduction mechanisms	K01090	-	3740.71	3603.2	3194.5	4866.1	3986.55	4399.97	52.58	57.33	57.25	85.83	83.22	78.56	3512.8	4417.54	55.72	82.5367	-0.56684	0.56684	0.000801757	0.0389492	no
comp12814_c0	comp12814_c0_seq1,comp12814_c0_seq2,comp12814_c0_seq3,comp12814_c0_seq4	4593	4216.41	Q9FN02	protein phosphatase	GO:0005654(nucleoplasm);GO:0046872(metal ion binding);GO:0004722(protein serine/threonine phosphatase activity);GO:0009785(blue light signaling pathway);GO:0009408(response to heat)	[R] General function prediction only	K01090	-	3453.67	2962.4	2518.57	3384.98	2962.02	3301.77	18.67	18.06	17.38	22.43	23.24	22.17	2978.21	3216.26	18.0367	22.6133	-0.326241	0.326241	0.000822603	0.0393078	no
comp11262_c0	comp11262_c0_seq1,comp11262_c0_seq2	1380	1318	-	-	-	[R] General function prediction only	-	-	624.53	551.08	532	328.31	307	321.99	11.27	11.23	12.23	7.33	8.09	7.26	569.203	319.1	11.5767	7.56	0.614762	0.614762	0.00082136	0.0393078	no
comp12231_c1	comp12231_c1_seq1,comp12231_c1_seq2	2482	1987.27	-	26S proteasome non-ATPase regulatory subunit 5	-	[O] Posttranslational modification, protein turnover, chaperones	K06692	-	1159.8	1048.18	897.72	1661.88	1348.99	1523.06	13.79	14.06	13.63	22.72	22.77	21.6	1035.23	1511.31	13.8267	22.3633	-0.693682	0.693682	0.000813539	0.0393078	no
comp7779_c0	comp7779_c0_seq1	3832	3832	Q9LJX4	-	GO:0005829(cytosol);GO:0005773(vacuole);GO:0003729(mRNA binding);GO:0006417(regulation of translation)	[J] Translation, ribosomal structure and biogenesis	-	-	2370.1	2115.97	1946.13	3323.53	2750.01	3056.34	14.07	14.21	14.75	24.62	24.14	22.92	2144.07	3043.29	14.3433	23.8933	-0.736228	0.736228	0.000817951	0.0393078	no
comp16564_c0	comp16564_c0_seq1,comp16564_c0_seq10,comp16564_c0_seq11,comp16564_c0_seq12,comp16564_c0_seq13,comp16564_c0_seq14,comp16564_c0_seq15,comp16564_c0_seq16,comp16564_c0_seq17,comp16564_c0_seq18,comp16564_c0_seq19,comp16564_c0_seq2,comp16564_c0_seq20,comp16564_	4375	3062.38	-	-	-	-	-	-	485.78	360	401.8	668.64	641.11	632.01	3.33	2.7	3.37	6.49	6.32	5.68	415.86	647.253	3.13333	6.16333	-0.976013	0.976013	0.000827627	0.0393348	no
comp12406_c0	comp12406_c0_seq1,comp12406_c0_seq2,comp12406_c0_seq3,comp12406_c0_seq4	4448	4220.76	P92934	-	GO:0016021(integral to membrane);GO:0005886(plasma membrane);GO:0015172(acidic amino acid transmembrane transporter activity);GO:0015175(neutral amino acid transmembrane transporter activity);GO:0015293(symporter activity);GO:0015810(aspartate transport);	[E] Amino acid transport and metabolism	-	-	1447.74	1523.56	1250.55	1908.92	1636.78	2059.96	7.84	9.29	8.6	13.08	13.82	14.24	1407.28	1868.55	8.57667	13.7133	-0.67709	0.67709	0.000827739	0.0393348	no
comp24402_c0	comp24402_c0_seq1	2298	2298	P93006	protein phosphatase	GO:0008287(protein serine/threonine phosphatase complex);GO:0046872(metal ion binding);GO:0004722(protein serine/threonine phosphatase activity);GO:0006470(protein dephosphorylation)	[T] Signal transduction mechanisms	K01090	-	1264.97	1057.8	883.5	1299.08	1170.44	1341.8	12.69	12	11.31	16.26	17.36	17.01	1068.76	1270.44	12	16.8767	-0.491996	0.491996	0.000832647	0.0394509	no
comp9187_c0	comp9187_c0_seq1,comp9187_c0_seq2,comp9187_c0_seq3	1494	1302.66	-	-	-	[O] Posttranslational modification, protein turnover, chaperones	-	-	455.85	462.93	420.48	652.4	594	652	8.26	9.56	9.84	14.75	15.97	14.99	446.42	632.8	9.22	15.2367	-0.724709	0.724709	0.000831066	0.0394509	no
comp10800_c0	comp10800_c0_seq1,comp10800_c0_seq2,comp10800_c0_seq3,comp10800_c0_seq4	1773	1447.82	-	-	-	-	-	-	410.63	334.84	369.01	578.5	468.35	609.04	6.64	6.1	7.5	11.42	11.54	12.66	371.493	551.963	6.74667	11.8733	-0.815478	0.815478	0.000835863	0.0395252	no
comp12055_c0	comp12055_c0_seq1,comp12055_c0_seq2,comp12055_c0_seq3,comp12055_c0_seq4,comp12055_c0_seq5	2015	1968.71	Q9D4H7	ATP-dependent Lon protease	GO:0004176(ATP-dependent peptidase activity);GO:0008270(zinc ion binding);GO:0006508(proteolysis)	[O] Posttranslational modification, protein turnover, chaperones	K01338	ko04112(Cell cycle - Caulobacter)	1078.91	862.99	867.51	1207.56	952.15	1107.87	12.51	11.52	12.83	17.87	17.06	16.61	936.47	1089.19	12.2867	17.18	-0.483636	0.483636	0.000838102	0.0395629	no
comp21031_c0	comp21031_c0_seq1	2134	2134	Q68EH9	cereblon	GO:0031464(Cul4A-RING ubiquitin ligase complex);GO:0005737(cytoplasm);GO:0005634(nucleus);GO:0004176(ATP-dependent peptidase activity);GO:0035118(embryonic pectoral fin morphogenesis);GO:0071600(otic vesicle morphogenesis);GO:0043161(proteasomal ubiquitin	[R] General function prediction only	K11793	-	1948.17	1935.47	1712.34	2562.65	2401.28	2728.08	21.1	23.71	23.67	34.63	38.46	37.33	1865.33	2564	22.8267	36.8067	-0.689247	0.689247	0.00085121	0.0396558	no
comp13096_c0	comp13096_c0_seq1,comp13096_c0_seq2,comp13096_c0_seq3,comp13096_c0_seq4,comp13096_c0_seq5,comp13096_c0_seq6	2369	2001.4	P0C8Q4	-	GO:0005795(Golgi stack);GO:0008378(galactosyltransferase activity)	[G] Carbohydrate transport and metabolism	-	-	1039.79	908.18	744.87	1474.38	1273.41	1393.24	14.52	14.1	12.8	22.05	21.91	21.18	897.613	1380.34	13.8067	21.7133	-0.653216	0.653216	0.000854139	0.0396558	no
comp18011_c0	comp18011_c0_seq1	858	858	Q9ZUX4	-	GO:0005747(mitochondrial respiratory chain complex I);GO:0005730(nucleolus);GO:0005773(vacuole);GO:0005507(copper ion binding);GO:0009853(photorespiration)	-	-	-	5499.36	4466.21	3812.41	1910.47	1917.95	2391.03	156.49	143.75	138.48	67.83	80.72	85.97	4592.66	2073.15	146.24	78.1733	0.90359	0.90359	0.000856161	0.0396558	no
comp7607_c0	comp7607_c0_seq1,comp7607_c0_seq2	1725	1321.84	Q9SKZ1	-	GO:0005737(cytoplasm);GO:0005634(nucleus);GO:0003677(DNA binding);GO:0006355(regulation of transcription, DNA-dependent);GO:0046686(response to cadmium ion);GO:0006351(transcription, DNA-dependent)	[K] Transcription	-	-	2393.9	2166.37	1932.62	2558.98	2087.12	2686.43	41.58	44.8	45.01	59.04	57.65	62.05	2164.3	2444.18	43.7967	59.58	-0.444007	0.444007	0.000853487	0.0396558	no
comp11341_c0	comp11341_c0_seq1,comp11341_c0_seq2	3949	3709.91	-	-	-	[K] Transcription	-	-	1156.98	894	909.97	1643.3	1441.56	1656.98	7.08	6.16	7.11	12.65	13.05	12.74	986.983	1580.61	6.78333	12.8133	-0.91758	0.91758	0.000856488	0.0396558	no
comp8871_c0	comp8871_c0_seq1,comp8871_c0_seq2	1299	1145	-	-	-	-	-	-	217.01	181	158	110	87	85	4.93	4.63	4.57	2.92	2.79	2.39	185.337	94	4.71	2.7	0.802768	0.802768	0.000864821	0.0396826	no
comp5052_c0	comp5052_c0_seq1	923	923	Q9LHJ8	-	GO:0005634(nucleus);GO:0003677(DNA binding);GO:0004842(ubiquitin-protein ligase activity);GO:0008270(zinc ion binding);GO:0051865(protein autoubiquitination);GO:0009414(response to water deprivation)	[R] General function prediction only	-	-	17406	14212.6	12352.5	7364.62	4866.06	7203.92	457.38	422.43	414.32	241.47	189.11	239.17	14657	6478.2	431.377	223.25	0.950288	0.950288	0.00087001	0.0397495	no
comp17341_c0	comp17341_c0_seq1	2605	2605	P21240	chaperonin GroEL	GO:0048046(apoplast);GO:0009941(chloroplast envelope);GO:0009570(chloroplast stroma);GO:0022626(cytosolic ribosome);GO:0005886(plasma membrane);GO:0010319(stromule);GO:0005524(ATP binding);GO:0005515(protein binding);GO:0008219(cell death);GO:0051085(chap	[O] Posttranslational modification, protein turnover, chaperones	K04077	ko03018(RNA degradation);ko04940(Type I diabetes mellitus)	3821.8	3741.47	2676.88	5085.06	4829.19	5446.44	33.69	37.3	30.12	55.93	62.96	60.66	3413.38	5120.23	33.7033	59.85	-0.82846	0.82846	0.000870622	0.0397495	no
comp10862_c0	comp10862_c0_seq1,comp10862_c0_seq2,comp10862_c0_seq3,comp10862_c0_seq4	1237	1165.84	-	-	-	-	-	-	602.01	489	479.32	323.01	244	293	12.39	11.46	12.59	8.15	7.35	7.61	523.443	286.67	12.1467	7.70333	0.657006	0.657006	0.000869793	0.0397495	no
comp21343_c0	comp21343_c0_seq1	3722	3722	-	-	-	[K] Transcription	-	-	1832.33	1362.65	1387.65	2258.33	2122.71	2494.01	11.21	9.43	10.83	17.23	19.2	19.27	1527.54	2291.68	10.49	18.5667	-0.8237	0.8237	0.000876473	0.0397647	no
comp5701_c0	comp5701_c0_seq1,comp5701_c0_seq2	1764	1732.24	-	-	-	-	-	-	4037.18	3545.91	3277.08	2210.08	1634.94	1947.65	54.44	53.95	56.37	37.05	32.63	33.2	3620.06	1930.89	54.92	34.2933	0.679403	0.679403	0.000882128	0.0398294	no
comp14273_c0	comp14273_c0_seq1,comp14273_c0_seq10,comp14273_c0_seq11,comp14273_c0_seq12,comp14273_c0_seq13,comp14273_c0_seq2,comp14273_c0_seq3,comp14273_c0_seq4,comp14273_c0_seq5,comp14273_c0_seq6,comp14273_c0_seq7,comp14273_c0_seq8,comp14273_c0_seq9	2885	1832.38	-	-	-	[S] Function unknown	-	-	806	798.85	647.89	1149.06	978.53	1066.32	10.09	11.69	10.45	17.8	18.47	17.63	750.913	1064.64	10.7433	17.9667	-0.741881	0.741881	0.000885623	0.0399314	no
comp13331_c0	comp13331_c0_seq1,comp13331_c0_seq2,comp13331_c0_seq3,comp13331_c0_seq4,comp13331_c0_seq5,comp13331_c0_seq6,comp13331_c0_seq7,comp13331_c0_seq8	1789	1640.3	-	-	-	-	-	-	1164.64	969.63	906.56	1549.63	1415.37	1582.19	16.82	15.87	16.7	27.32	29.67	28.19	1013.61	1515.73	16.4633	28.3933	-0.786296	0.786296	0.000891884	0.0400478	no
comp31753_c0	comp31753_c0_seq1	1037	1037	Q945M8	-	GO:0016021(integral to membrane);GO:0005886(plasma membrane)	-	-	-	496	426	430	211.71	146.01	225	11.49	11.16	12.72	6.12	5	6.59	450.667	194.24	11.79	5.90333	0.997962	0.997962	0.000920958	0.0404375	no
comp9438_c0	comp9438_c0_seq1,comp9438_c0_seq2	1665	1574.41	-	-	-	-	-	-	500.78	522.7	455.99	744.71	609	735	7.18	8.46	8.5	13.99	12.97	13.47	493.157	696.237	8.04667	13.4767	-0.744001	0.744001	0.000921633	0.0404375	no
comp22054_c0	comp22054_c0_seq1	1396	1396	Q9FHM7	-	GO:0005886(plasma membrane);GO:0009506(plasmodesma);GO:0005774(vacuolar membrane)	[C] Energy production and conversion	-	-	1673.6	1515.76	1365.09	748	532.69	733.33	28.24	28.93	29.41	15.75	13.3	15.64	1518.15	671.34	28.86	14.8967	0.954082	0.954082	0.000927646	0.0404375	no
comp12668_c0	comp12668_c0_seq1,comp12668_c0_seq2	3838	3639.44	Q91YR7	-	GO:0000398(nuclear mRNA splicing, via spliceosome)	-	-	-	3074.21	2425.31	2183.64	4467.33	3397.76	4040.67	19.25	17.14	17.52	34.76	31.22	31.83	2561.05	3968.59	17.97	32.6033	-0.859429	0.859429	0.000951012	0.0409339	no
comp15529_c0	comp15529_c0_seq1,comp15529_c0_seq10,comp15529_c0_seq11,comp15529_c0_seq12,comp15529_c0_seq13,comp15529_c0_seq14,comp15529_c0_seq15,comp15529_c0_seq16,comp15529_c0_seq17,comp15529_c0_seq18,comp15529_c0_seq19,comp15529_c0_seq2,comp15529_c0_seq20,comp15529_	2734	1266.74	Q9SYM4	alpha,alpha-trehalose-phosphate synthase (UDP-forming)	GO:0005618(cell wall);GO:0005576(extracellular region);GO:0005773(vacuole);GO:0003825(alpha,alpha-trehalose-phosphate synthase (UDP-forming) activity);GO:0051301(cell division);GO:0009793(embryo development ending in seed dormancy);GO:0009832(plant-type c	[G] Carbohydrate transport and metabolism	K00697	ko00500(Starch and sucrose metabolism)	1148.02	997.98	976.62	641.72	483.98	556.56	23.55	22.88	25.34	15.88	14.3	14.45	1040.87	560.753	23.9233	14.8767	0.685367	0.685367	0.000961229	0.0410994	no
comp5086_c0	comp5086_c0_seq1	1208	1208	-	-	-	-	-	-	1552.69	1335.05	1091.56	664.12	626.87	674.14	30.55	29.71	27.41	16.3	18.24	16.76	1326.43	655.043	29.2233	17.1	0.773124	0.773124	0.000969229	0.0411082	no
comp18519_c0	comp18519_c0_seq1	1012	1012	-	-	-	-	-	-	3586.6	3343.28	3034.88	1863.87	1290.07	1545.61	85.3	89.94	92.14	55.31	45.38	46.45	3321.59	1566.52	89.1267	49.0467	0.861702	0.861702	0.000964542	0.0411082	no
comp11918_c1	comp11918_c1_seq1,comp11918_c1_seq2,comp11918_c1_seq3	3219	2452.3	Q5TGY1	-	GO:0016021(integral to membrane)	[S] Function unknown	-	-	1418.39	1308.92	1091.77	1989.76	1730.17	2103.18	13.46	13.83	13.23	22.95	23.54	24.68	1273.03	1941.04	13.5067	23.7233	-0.812635	0.812635	0.000971245	0.0411082	no
comp26022_c0	comp26022_c0_seq1	1778	1778	-	-	-	-	-	-	548.85	435.66	353.99	662.74	604.75	745.49	7.19	6.45	5.92	10.83	11.71	12.33	446.167	670.993	6.52	11.6233	-0.83408	0.83408	0.000974577	0.0411397	no
comp5606_c0	comp5606_c0_seq1,comp5606_c0_seq2	1194	985.62	-	-	-	-	-	-	4631	3661.73	3612.09	1715.39	1690.76	2156.72	116.22	103.17	115.29	53.39	62.15	67.27	3968.27	1854.29	111.56	60.9367	0.872437	0.872437	0.000979736	0.041247	no
comp13505_c0	comp13505_c0_seq1,comp13505_c0_seq2,comp13505_c0_seq3	4602	3173.74	Q9LX30	non-specific serine/threonine protein kinase	GO:0004812(aminoacyl-tRNA ligase activity);GO:0005524(ATP binding);GO:0004674(protein serine/threonine kinase activity);GO:0004713(protein tyrosine kinase activity);GO:0008652(cellular amino acid biosynthetic process);GO:0006412(translation)	[J] Translation, ribosomal structure and biogenesis	K08282	-	1033.16	985.28	720.65	2231.01	1548.98	1900.95	8.97	9.15	7.61	17.35	15.27	15.67	913.03	1893.65	8.57667	16.0967	-0.908273	0.908273	0.000986705	0.041433	no
comp21264_c0	comp21264_c0_seq1	1259	1259	-	-	-	-	-	-	2794.08	2796.66	2421.61	1015.17	1056.9	1347.89	52.6	59.55	58.19	23.85	29.43	32.06	2670.78	1139.99	56.78	28.4467	0.997123	0.997123	0.000993511	0.0416064	no
comp15976_c1	comp15976_c1_seq1,comp15976_c1_seq10,comp15976_c1_seq11,comp15976_c1_seq12,comp15976_c1_seq13,comp15976_c1_seq14,comp15976_c1_seq15,comp15976_c1_seq16,comp15976_c1_seq17,comp15976_c1_seq2,comp15976_c1_seq3,comp15976_c1_seq4,comp15976_c1_seq5,comp15976_c1_	2748	1878.53	Q9FKG3	6-phosphofructokinase	GO:0005945(6-phosphofructokinase complex);GO:0009507(chloroplast);GO:0003872(6-phosphofructokinase activity);GO:0005524(ATP binding);GO:0006096(glycolysis)	[G] Carbohydrate transport and metabolism	K00850	ko00010(Glycolysis / Gluconeogenesis);ko00030(Pentose phosphate pathway);ko00051(Fructose and mannose metabolism);ko00052(Galactose metabolism)	333.25	259.23	215	575.18	476.72	555.39	5.06	4.14	3.9	8.68	8.86	7.9	269.16	535.763	4.36667	8.48	-0.957532	0.957532	0.00100253	0.0416936	no
comp3783_c0	comp3783_c0_seq1,comp3783_c0_seq2	3091	3045.08	P59278	-	-	-	-	-	2740.23	2367.01	2061.37	2642.94	2246.13	2748.98	20.32	19.9	19.48	24.87	25.03	26.18	2389.54	2546.02	19.9	25.36	-0.349786	0.349786	0.00101139	0.0418471	no
comp11183_c0	comp11183_c0_seq1,comp11183_c0_seq2,comp11183_c0_seq3	3679	3114.94	Q55DY8	mitochondrial carrier protein, MC family	GO:0016021(integral to membrane);GO:0005743(mitochondrial inner membrane);GO:0005488(binding);GO:0005381(iron ion transmembrane transporter activity);GO:0048250(mitochondrial iron ion transport)	[C] Energy production and conversion	K03454	-	1588.18	1463.06	1366.94	2203.77	2045.97	2240.67	12.93	13.54	14.19	22.5	24.81	23.1	1472.73	2163.47	13.5533	23.47	-0.79217	0.79217	0.00101112	0.0418471	no
comp18235_c0	comp18235_c0_seq1	1549	1549	-	-	-	[R] General function prediction only	-	-	6951.19	6272.95	5823.31	3555.94	2438.97	3127.14	105.14	107.32	112.43	67.11	54.56	59.76	6349.15	3040.68	108.297	60.4767	0.840538	0.840538	0.00101492	0.0418848	no
comp17262_c0	comp17262_c0_seq1	927	927	-	-	-	-	-	-	4848.16	4077.8	4008.81	2097.85	1836.15	2519.09	126.8	120.63	133.83	68.46	71.02	83.24	4311.59	2151.03	127.087	74.24	0.775544	0.775544	0.00101776	0.0419318	no
comp17811_c0	comp17811_c0_seq1	1074	1074	O04834	Arf/Sar family, other	GO:0005783(endoplasmic reticulum);GO:0005794(Golgi apparatus);GO:0005886(plasma membrane);GO:0005525(GTP binding);GO:0006886(intracellular protein transport);GO:0016192(vesicle-mediated transport)	[U] Intracellular trafficking, secretion, and vesicular transport	K07977	-	6354.52	5309.54	5410.3	2414.98	2223.19	2907.99	141.76	133.98	154.07	67.23	73.35	81.97	5691.45	2515.39	143.27	74.1833	0.94957	0.94957	0.00102363	0.0420634	no
comp23557_c0	comp23557_c0_seq1	1429	1429	-	-	-	-	-	-	722.01	586.86	611.22	912.61	869.3	964	11.89	10.93	12.85	18.75	21.17	20.05	640.03	915.303	11.89	19.99	-0.74953	0.74953	0.00103088	0.0421757	no
comp15272_c0	comp15272_c0_seq1,comp15272_c0_seq2,comp15272_c0_seq3,comp15272_c0_seq4,comp15272_c0_seq5	4311	3690.18	Q9LQV2	RNA-dependent RNA polymerase 1	GO:0000166(nucleotide binding);GO:0003723(RNA binding);GO:0003968(RNA-directed RNA polymerase activity);GO:0006952(defense response);GO:0031047(gene silencing by RNA);GO:0060148(positive regulation of posttranscriptional gene silencing);GO:0009751(respons	[A] RNA processing and modification	K11699	-	991.4	1130.61	852.37	1533.95	1393.09	1745.31	6.36	8.02	6.86	12.03	13.3	13.62	991.46	1557.45	7.08	12.9833	-0.87484	0.87484	0.00103112	0.0421757	no
comp10525_c0	comp10525_c0_seq1,comp10525_c0_seq2,comp10525_c0_seq3	1384	1245.28	-	-	-	-	-	-	349	307.42	238.01	419.22	349	427	6.92	6.69	6.21	10.69	10.58	10.83	298.143	398.407	6.60667	10.7	-0.695616	0.695616	0.00103113	0.0421757	no
comp12608_c1	comp12608_c1_seq1	606	606	-	-	-	-	-	-	146	121.29	99.78	48	46.64	63.04	6.12	5.75	5.34	2.51	2.89	3.34	122.357	52.56	5.73667	2.91333	0.977542	0.977542	0.00103163	0.0421757	no
comp25618_c0	comp25618_c0_seq1	3071	3071	-	-	-	[R] General function prediction only	-	-	974.77	733.01	860.26	1398.59	1299.86	1579.91	7.26	6.17	8.17	12.99	14.31	14.86	856.013	1426.12	7.2	14.0533	-0.964844	0.964844	0.00103378	0.0422275	no
comp15753_c0	comp15753_c0_seq1,comp15753_c0_seq10,comp15753_c0_seq11,comp15753_c0_seq12,comp15753_c0_seq13,comp15753_c0_seq14,comp15753_c0_seq15,comp15753_c0_seq16,comp15753_c0_seq17,comp15753_c0_seq18,comp15753_c0_seq19,comp15753_c0_seq2,comp15753_c0_seq20,comp15753_	3411	2576.56	Q8L7A4	stromal membrane-associated protein	GO:0008060(ARF GTPase activator activity);GO:0008270(zinc ion binding);GO:0032312(regulation of ARF GTPase activity)	[T] Signal transduction mechanisms	K12486	ko04144(Endocytosis)	957.66	836.1	612.67	1429.28	1294.37	1297.92	8.24	8.12	6.47	14.48	16.01	13.96	802.143	1340.52	7.61	14.8167	-0.961253	0.961253	0.0010364	0.0422577	no
comp9197_c0	comp9197_c0_seq1,comp9197_c0_seq2	4355	3365.14	Q652L2	protein HIRA/HIR1	GO:0005634(nucleus);GO:0016568(chromatin modification);GO:0006355(regulation of transcription, DNA-dependent);GO:0006351(transcription, DNA-dependent)	[D] Cell cycle control, cell division, chromosome partitioning ;[K] Transcription	K11293	-	920.34	793.8	697.81	1455.9	1456.31	1559.27	8.55	8.97	8.21	14.46	15.86	15.76	803.983	1490.49	8.57667	15.36	-0.840689	0.840689	0.00103945	0.0422577	no
comp13167_c0	comp13167_c0_seq1,comp13167_c0_seq2,comp13167_c0_seq3,comp13167_c0_seq4	2786	2072.19	-	-	-	[G] Carbohydrate transport and metabolism	-	-	735.02	705.01	679.83	1303.47	1224.18	1332.27	9.44	10.55	11.3	18.33	20.93	19.21	706.62	1286.64	10.43	19.49	-0.901995	0.901995	0.00104747	0.0422803	no
comp22378_c0	comp22378_c0_seq1	2615	2615	Q96KG9	SCY1-like	GO:0005801(cis-Golgi network);GO:0030126(COPI vesicle coat);GO:0005793(endoplasmic reticulum-Golgi intermediate compartment);GO:0005815(microtubule organizing center);GO:0005634(nucleus);GO:0005524(ATP binding);GO:0003677(DNA binding);GO:0004713(protein t	[R] General function prediction only	K08876	-	1324.03	1018.71	1192.64	2199.37	1805.34	1982.26	11.62	10.12	13.37	24.09	23.44	21.99	1178.46	1995.66	11.7033	23.1733	-0.985546	0.985546	0.00105052	0.0423346	no
comp4160_c0	comp4160_c0_seq1,comp4160_c0_seq2	1304	1292.61	O64628	-	GO:0045454(cell redox homeostasis)	[O] Posttranslational modification, protein turnover, chaperones ;[C] Energy production and conversion	-	-	7580.97	7102.87	5642.88	3975.22	2972.12	3997.79	138.53	147.01	131.6	90.9	80.52	92.37	6775.57	3648.38	139.047	87.93	0.661142	0.661142	0.00105703	0.0424538	no
comp5241_c0	comp5241_c0_seq1,comp5241_c0_seq2	2513	2476.88	-	exocyst complex component 7	-	[U] Intracellular trafficking, secretion, and vesicular transport	K07195	ko04910(Insulin signaling pathway)	1572.23	1400.19	1065.35	1998.15	1887.71	2220.92	14.54	14.76	12.61	23.17	25.9	26.1	1345.92	2035.59	13.97	25.0567	-0.842862	0.842862	0.00106291	0.0425129	no
comp22441_c0	comp22441_c0_seq1	1488	1488	-	-	-	[S] Function unknown	-	-	1867.14	1695.67	1485.74	723.83	706.99	814	29.46	30.26	29.92	14.25	16.5	16.23	1682.85	748.273	29.88	15.66	0.932096	0.932096	0.00106664	0.0426059	no
comp5264_c0	comp5264_c0_seq1,comp5264_c0_seq2	2829	1796.95	Q9FJW6	-	GO:0009507(chloroplast);GO:0005488(binding);GO:0009658(chloroplast organization)	[R] General function prediction only	-	-	701.82	695.63	508.79	1281.32	959	1142.01	10.91	11.71	9.29	21.69	18.94	19.63	635.413	1127.44	10.6367	20.0867	-0.917192	0.917192	0.00107412	0.0427498	no
comp9630_c0	comp9630_c0_seq1,comp9630_c0_seq2,comp9630_c0_seq3,comp9630_c0_seq4	2800	2272.23	-	-	-	-	-	-	1372.92	1260.27	957.99	1619.01	1485.87	1731.74	13.88	14.75	12.71	21.23	23.88	22.88	1197.06	1612.21	13.78	22.6633	-0.717784	0.717784	0.0010819	0.0427931	no
comp9727_c0	comp9727_c0_seq1,comp9727_c0_seq2,comp9727_c0_seq3	2007	1808.13	A5WBF8	molecular chaperone DnaJ	GO:0005737(cytoplasm);GO:0005524(ATP binding);GO:0031072(heat shock protein binding);GO:0046872(metal ion binding);GO:0051082(unfolded protein binding);GO:0006260(DNA replication);GO:0006457(protein folding);GO:0009408(response to heat)	[O] Posttranslational modification, protein turnover, chaperones	K03686	-	1007.51	994.23	718.69	1300.64	1200.97	1462	13.24	14.49	11.9	21.43	23.58	24.33	906.81	1321.2	13.21	23.1133	-0.807095	0.807095	0.00108949	0.0428968	no
comp4399_c0	comp4399_c0_seq1	570	570	Q940X7	RING-box protein 1	GO:0005737(cytoplasm);GO:0005634(nucleus);GO:0019005(SCF ubiquitin ligase complex);GO:0005515(protein binding);GO:0008270(zinc ion binding);GO:0016567(protein ubiquitination);GO:0009733(response to auxin stimulus)	[O] Posttranslational modification, protein turnover, chaperones	K03868	ko03420(Nucleotide excision repair);ko04110(Cell cycle);ko04111(Cell cycle - yeast);ko04114(Oocyte meiosis);ko04120(Ubiquitin mediated proteolysis);ko04310(Wnt signaling pathway);ko04350(TGF-beta signaling pathway);ko05200(Pathways in cancer);ko05211(Rena	2604.74	2564.85	2163.6	1400.21	1061.76	1321.7	117.16	130.49	124.22	78.58	70.63	75.11	2444.4	1261.22	123.957	74.7733	0.72924	0.72924	0.00109345	0.0429268	no
comp25410_c0	comp25410_c0_seq1	3767	3767	O46606	esterase / lipase	GO:0005737(cytoplasm);GO:0016787(hydrolase activity);GO:0046872(metal ion binding);GO:0016042(lipid catabolic process)	[I] Lipid transport and metabolism ;[U] Intracellular trafficking, secretion, and vesicular transport	K01066	ko00623(2,4-Dichlorobenzoate degradation);ko00960(Tropane, piperidine and pyridine alkaloid biosynthesis)	785.99	636.02	651.48	1190.55	1003.24	1152.74	4.75	4.35	5.02	8.97	8.96	8.8	691.163	1115.51	4.70667	8.91	-0.92072	0.92072	0.00109703	0.0430171	no
comp22371_c0	comp22371_c0_seq1	817	817	-	BolA protein	-	[T] Signal transduction mechanisms	K05527	-	591.81	530	505.2	321.98	275.92	273	17.77	18	19.36	12.06	12.25	10.36	542.337	290.3	18.3767	11.5567	0.66915	0.66915	0.00109948	0.0430782	no
comp12338_c1	comp12338_c1_seq1,comp12338_c1_seq2	2157	2069.73	O04376	protein phosphatase 2 (formerly 2A), regulatory subunit B'	GO:0000159(protein phosphatase type 2A complex);GO:0005488(binding);GO:0008601(protein phosphatase type 2A regulator activity);GO:0007165(signal transduction)	[T] Signal transduction mechanisms	K11584	ko04113(Meiosis - yeast);ko04114(Oocyte meiosis);ko04310(Wnt signaling pathway)	1487.1	1411.34	1217.03	2316.93	1863.87	2063.23	16.7	18.06	17.53	32.23	30.62	29.25	1371.82	2081.34	17.43	30.7	-0.816666	0.816666	0.00110529	0.0431646	no
comp17356_c0	comp17356_c0_seq1	2736	2736	Q94AH6	cullin 3	GO:0000794(condensed nuclear chromosome);GO:0031461(cullin-RING ubiquitin ligase complex);GO:0005829(cytosol);GO:0009524(phragmoplast);GO:0005819(spindle);GO:0031625(ubiquitin protein ligase binding);GO:0009734(auxin mediated signaling pathway);GO:0007049	[D] Cell cycle control, cell division, chromosome partitioning	K03869	ko04120(Ubiquitin mediated proteolysis)	13582.6	12714.9	11833.5	16104.2	13237.1	15093.6	113.83	120.53	126.59	168.41	164.07	159.82	12710.3	14811.6	120.317	164.1	-0.447739	0.447739	0.00112056	0.0432683	no
comp19379_c0	comp19379_c0_seq1	2903	2903	O64477	interleukin-1 receptor-associated kinase 4	GO:0016021(integral to membrane);GO:0044459(plasma membrane part);GO:0005524(ATP binding);GO:0005516(calmodulin binding);GO:0004674(protein serine/threonine kinase activity);GO:0004872(receptor activity);GO:0005529(sugar binding);GO:0048544(recognition of	-	K04733	ko04210(Apoptosis);ko04620(Toll-like receptor signaling pathway);ko04722(Neurotrophin signaling pathway);ko05140(Leishmaniasis);ko05142(Chagas disease)	3541.34	3344.52	2842.62	4628.78	3677.45	4216.88	27.93	29.83	28.61	45.55	42.89	42.02	3242.83	4174.37	28.79	43.4867	-0.595005	0.595005	0.0011317	0.0435582	no
comp28006_c0	comp28006_c0_seq1	1634	1634	-	-	-	[T] Signal transduction mechanisms	-	-	1039.01	798.55	786.86	355	375	440.6	14.86	12.92	14.36	6.33	7.93	7.96	874.807	390.2	14.0467	7.40667	0.923331	0.923331	0.00113888	0.0436943	no
comp21147_c0	comp21147_c0_seq1	1366	1366	-	-	-	[I] Lipid transport and metabolism	-	-	1506	1195.07	1157.17	650.84	617.27	765.83	26	23.34	25.5	14.02	15.76	16.71	1286.08	677.98	24.9467	15.4967	0.686889	0.686889	0.00114038	0.043717	no
comp23526_c0	comp23526_c0_seq1	2564	2564	-	exocyst complex component 7	-	[U] Intracellular trafficking, secretion, and vesicular transport	K07195	ko04910(Insulin signaling pathway)	987.23	996.13	831.8	1174.87	1062.65	1176.56	8.85	10.09	9.51	13.13	14.08	13.32	938.387	1138.03	9.48333	13.51	-0.510562	0.510562	0.00114266	0.0437347	no
comp21511_c0	comp21511_c0_seq1	1499	1499	Q96DI7	F-box and WD-40 domain protein 7	GO:0071013(catalytic step 2 spliceosome);GO:0005737(cytoplasm);GO:0005654(nucleoplasm);GO:0005732(small nucleolar ribonucleoprotein complex);GO:0005682(U5 snRNP);GO:0005515(protein binding);GO:0000398(nuclear mRNA splicing, via spliceosome)	[A] RNA processing and modification	K10260	ko04120(Ubiquitin mediated proteolysis)	2408.64	2102.08	1766.13	1160.19	1134.86	1254	37.71	37.22	35.29	22.66	26.28	24.8	2092.28	1183.02	36.74	24.58	0.579867	0.579867	0.00115295	0.0438834	no
comp14042_c0	comp14042_c0_seq1,comp14042_c0_seq2,comp14042_c0_seq3	827	533.75	-	-	-	[S] Function unknown	-	-	278.89	234.08	212.41	95.05	104	125	14.74	13.05	13.13	5.7	7.63	7.29	241.793	108.017	13.64	6.87333	0.988762	0.988762	0.00115449	0.0439071	no
comp7768_c0	comp7768_c0_seq1	1800	1800	-	-	-	-	-	-	243	201.94	214	300.99	269.66	328.97	3.14	2.95	3.53	4.85	5.15	5.37	219.647	299.873	3.20667	5.12333	-0.676008	0.676008	0.00116601	0.0439617	no
comp19598_c0	comp19598_c0_seq1	3404	3404	Q9FIL7	cyclin-dependent kinase	-	[T] Signal transduction mechanisms	K07760	-	2193.31	2251.36	2157.52	3477.43	3265.74	3386.94	14.69	17.06	18.45	29.07	32.36	28.67	2200.73	3376.7	16.7333	30.0333	-0.84384	0.84384	0.00117376	0.0440466	no
comp16254_c0	comp16254_c0_seq1,comp16254_c0_seq2,comp16254_c0_seq3,comp16254_c0_seq4	4107	1526.29	Q9UR24	DNA excision repair protein ERCC-6	GO:0005829(cytosol);GO:0005634(nucleus);GO:0005524(ATP binding);GO:0003677(DNA binding);GO:0004386(helicase activity);GO:0006283(transcription-coupled nucleotide-excision repair)	[K] Transcription ;[L] Replication, recombination and repair	K10841	ko03420(Nucleotide excision repair)	2402.87	2249.96	1680.93	3391.23	3163.31	3385.41	43.3	45.55	39.62	70.49	79.39	72.99	2111.25	3313.32	42.8233	74.29	-0.794771	0.794771	0.00118117	0.0440571	no
comp8300_c0	comp8300_c0_seq1	1203	1203	O14327	apoptosis regulator BCL-W	GO:0005634(nucleus);GO:0000166(nucleotide binding);GO:0008143(poly(A) RNA binding);GO:0005515(protein binding);GO:0000289(nuclear-transcribed mRNA poly(A) tail shortening)	[A] RNA processing and modification	K02163	-	3037.31	2475.38	2126.96	1352.88	1276.82	1324.91	60.02	55.33	53.65	33.36	37.32	33.08	2546.55	1318.2	56.3333	34.5867	0.703773	0.703773	0.00118024	0.0440571	no
comp17859_c0	comp17859_c0_seq1	3060	3060	-	hypothetical protein	-	[S] Function unknown	K09140	-	3264.01	2466.3	2601.73	4005.86	3840.13	4356.69	24.39	20.84	24.81	37.35	42.43	41.13	2777.35	4067.56	23.3467	40.3033	-0.787683	0.787683	0.0011827	0.0440571	no
comp18062_c0	comp18062_c0_seq1	478	478	-	-	-	-	-	-	3591.04	3463.14	3125.2	1425.33	1249.24	1824.71	198.3	216.31	220.29	98.21	102.03	127.31	3393.13	1499.76	211.633	109.183	0.954814	0.954814	0.00121206	0.0445864	no
comp13435_c0	comp13435_c0_seq1,comp13435_c0_seq2,comp13435_c0_seq3,comp13435_c0_seq4,comp13435_c0_seq5,comp13435_c0_seq6	4667	2416.11	Q949Z1	polygalacturonase	GO:0005618(cell wall);GO:0005576(extracellular region);GO:0004650(polygalacturonase activity);GO:0005975(carbohydrate metabolic process);GO:0007047(cellular cell wall organization)	-	K01184	ko00040(Pentose and glucuronate interconversions);ko00500(Starch and sucrose metabolism)	3138.49	2620.01	2033.01	3560.79	3038.76	3303.67	29.88	28.69	26.08	41.84	41.5	38.69	2597.17	3301.07	28.2167	40.6767	-0.527654	0.527654	0.00122179	0.0446278	no
comp16618_c0	comp16618_c0_seq1,comp16618_c0_seq2,comp16618_c0_seq3,comp16618_c0_seq4,comp16618_c0_seq5,comp16618_c0_seq6	5224	4663.68	Q7G193	indole-3-acetaldehyde oxidase	GO:0051537(2 iron, 2 sulfur cluster binding);GO:0009055(electron carrier activity);GO:0050660(flavin adenine dinucleotide binding);GO:0050302(indole-3-acetaldehyde oxidase activity);GO:0005506(iron ion binding);GO:0008762(UDP-N-acetylmuramate dehydrogenas	[F] Nucleotide transport and metabolism	K11817	ko00380(Tryptophan metabolism)	1984.86	1953.21	1737.91	2734.82	2342.89	2790.42	9.68	10.78	10.88	16.45	16.69	16.99	1891.99	2622.71	10.4467	16.71	-0.677669	0.677669	0.00122382	0.044668	no
comp4102_c0	comp4102_c0_seq1,comp4102_c0_seq2	679	664.37	-	-	-	-	-	-	7145.78	5835.31	4948.56	2650.04	2815.34	3187.37	273.12	251.75	240.58	126.55	157.03	152.38	5976.55	2884.25	255.15	145.32	0.812112	0.812112	0.00122605	0.0446962	no
comp20508_c0	comp20508_c0_seq1	866	866	-	-	-	-	-	-	1419.99	1272.29	1019.25	609.78	582.65	733.85	40	40.54	36.65	21.43	24.27	26.12	1237.18	642.093	39.0633	23.94	0.706392	0.706392	0.0012305	0.0447685	no
comp20509_c0	comp20509_c0_seq1	1441	1441	-	-	-	[K] Transcription	-	-	3043.95	2466.62	2500.93	1356.67	987.54	1206.16	49.68	45.53	52.1	27.63	23.84	24.87	2670.5	1183.46	49.1033	25.4467	0.948344	0.948344	0.00125594	0.0447932	no
comp14906_c0	comp14906_c0_seq1,comp14906_c0_seq2,comp14906_c0_seq3	4379	4168.82	Q9LMF0	limonoid glucosyltransferase	GO:0016758(transferase activity, transferring hexosyl groups)	[G] Carbohydrate transport and metabolism ;[C] Energy production and conversion	K08236	-	949.92	775.96	734	1182.05	1041.62	1099.7	5.17	4.72	5.06	7.83	8.24	7.44	819.96	1107.79	4.98333	7.83667	-0.653129	0.653129	0.00126291	0.0447932	no
comp21239_c0	comp21239_c0_seq1	1730	1730	O43347	-	GO:0005737(cytoplasm);GO:0005634(nucleus);GO:0000166(nucleotide binding);GO:0007399(nervous system development)	[R] General function prediction only	-	-	892.22	721	613.67	915.94	847.17	947.47	12.02	10.99	10.55	15.4	16.88	16.13	742.297	903.527	11.1867	16.1367	-0.528562	0.528562	0.00125725	0.0447932	no
comp22920_c0	comp22920_c0_seq1	1632	1632	-	glycerophosphoryl diester phosphodiesterase	-	[C] Energy production and conversion	K01126	ko00564(Glycerophospholipid metabolism)	2211.57	2112.42	1693.03	865.03	945.36	970.88	31.67	34.21	30.94	15.46	20.02	17.57	2005.67	927.09	32.2733	17.6833	0.867952	0.867952	0.00125446	0.0447932	no
comp9893_c0	comp9893_c0_seq1,comp9893_c0_seq2	691	615.68	O80366	-	GO:0005634(nucleus);GO:0005515(protein binding);GO:0000156(two-component response regulator activity);GO:0007623(circadian rhythm);GO:0009736(cytokinin mediated signaling pathway);GO:0006355(regulation of transcription, DNA-dependent);GO:0006351(transcrip	[K] Transcription	-	-	147.12	124.01	111.02	64.04	54.22	70.87	6.37	6.24	5.96	3.33	3.08	3.82	127.383	63.0433	6.19	3.41	0.860168	0.860168	0.00125978	0.0447932	no
comp15646_c1	comp15646_c1_seq1,comp15646_c1_seq2,comp15646_c1_seq3,comp15646_c1_seq4,comp15646_c1_seq5,comp15646_c1_seq6,comp15646_c1_seq7	1952	1696.48	P47927	AP2-like factor, euAP2 lineage	GO:0005634(nucleus);GO:0003677(DNA binding);GO:0003700(sequence-specific DNA binding transcription factor activity);GO:0030154(cell differentiation);GO:0010073(meristem maintenance);GO:0048316(seed development);GO:0010093(specification of floral organ ide	-	K09284	-	4455.47	3502.48	3922.51	6756.2	5494.19	6884.97	60.68	53.64	68.2	113.54	109.26	117.64	3960.15	6378.45	60.84	113.48	-0.899346	0.899346	0.00125688	0.0447932	no
comp19845_c0	comp19845_c0_seq1	5914	5914	Q9LZX8	IQ motif and SEC7 domain-containing protein	-	[U] Intracellular trafficking, secretion, and vesicular transport	K12495	ko04144(Endocytosis)	4222.98	3875.48	3396.38	5943.17	5390.84	5991.43	16.13	16.75	16.56	28.33	30.46	28.92	3831.61	5775.15	16.48	29.2367	-0.827063	0.827063	0.0012636	0.0447932	no
comp6231_c0	comp6231_c0_seq1,comp6231_c0_seq2	2388	2226.03	Q39230	seryl-tRNA synthetase	GO:0005829(cytosol);GO:0005524(ATP binding);GO:0004828(serine-tRNA ligase activity);GO:0046686(response to cadmium ion);GO:0006434(seryl-tRNA aminoacylation)	[J] Translation, ribosomal structure and biogenesis	K01875	ko00970(Aminoacyl-tRNA biosynthesis)	2777.19	2162.96	2329.02	3921.04	3170.16	3581.44	28.63	24.77	30.31	49.59	47.56	46.19	2423.06	3557.55	27.9033	47.78	-0.775969	0.775969	0.0012746	0.0449822	no
comp19049_c0	comp19049_c0_seq1	1791	1791	Q8LGG8	large subunit ribosomal protein L7/L12	GO:0005886(plasma membrane);GO:0006950(response to stress)	-	K02935	ko03010(Ribosome)	2070.21	2065.6	1691.5	799.19	828.4	1034.79	26.9	30.36	28.05	12.96	15.92	16.99	1942.44	887.46	28.4367	15.29	0.895164	0.895164	0.0012764	0.0449965	no
comp12384_c0	comp12384_c0_seq1,comp12384_c0_seq2,comp12384_c0_seq3,comp12384_c0_seq4	1980	1735.67	Q9LZV4	non-specific serine/threonine protein kinase	GO:0009534(chloroplast thylakoid);GO:0005524(ATP binding);GO:0004674(protein serine/threonine kinase activity);GO:0042549(photosystem II stabilization)	[R] General function prediction only	K08282	-	1758.9	1449.01	1094.61	2628.78	2096.16	2211.52	24.28	22.72	19.41	44.55	42.24	38.36	1434.17	2312.15	22.1367	41.7167	-0.914186	0.914186	0.00131163	0.0451859	no
comp12184_c0	comp12184_c0_seq1,comp12184_c0_seq2,comp12184_c0_seq3,comp12184_c0_seq4	1965	1778.91	-	-	-	[P] Inorganic ion transport and metabolism	-	-	1598.01	1520.01	1217.02	1832.98	1445.76	1761	20.79	22.3	20.1	30.24	29.08	29.46	1445.01	1679.91	21.0633	29.5933	-0.490538	0.490538	0.00131224	0.0451859	no
comp21682_c0	comp21682_c0_seq1	2399	2399	Q53GS9	-	-	[Z] Cytoskeleton	K01376	-	1271.04	966.76	987.24	1959.05	1527.88	1685.98	12.2	10.49	12.09	23.46	21.68	20.44	1075.01	1724.3	11.5933	21.86	-0.914998	0.914998	0.00130874	0.0451859	no
comp21544_c0	comp21544_c0_seq1	3101	3101	-	ATP-dependent Lon protease	-	[O] Posttranslational modification, protein turnover, chaperones	K01338	ko04112(Cell cycle - Caulobacter)	1125.96	952.77	825.83	572.1	474.91	577.01	8.3	7.94	7.77	5.26	5.18	5.37	968.187	541.34	8.00333	5.27	0.602798	0.602798	0.00131719	0.0451859	no
comp5491_c0	comp5491_c0_seq1,comp5491_c0_seq2	750	699.94	Q8GY89	-	-	[L] Replication, recombination and repair	-	-	391	377	341.19	163.29	174.97	161	13.86	15.21	15.58	7.25	9.17	7.2	369.73	166.42	14.8833	7.87333	0.918651	0.918651	0.00132092	0.0452527	no
comp13474_c0	comp13474_c0_seq1,comp13474_c0_seq10,comp13474_c0_seq2,comp13474_c0_seq3,comp13474_c0_seq4,comp13474_c0_seq5,comp13474_c0_seq6,comp13474_c0_seq7,comp13474_c0_seq8,comp13474_c0_seq9	2893	2660.08	Q93YN9	-	GO:0005524(ATP binding);GO:0035299(inositol pentakisphosphate 2-kinase activity);GO:0032942(inositol tetrakisphosphate 2-kinase activity);GO:0030643(cellular phosphate ion homeostasis);GO:0042742(defense response to bacterium);GO:0050832(defense response	[T] Signal transduction mechanisms	-	-	3342.11	3099.24	2750.7	4256.89	3732.1	4536.73	28.86	30.37	30.6	44.92	47.31	49.02	3064.02	4175.24	29.9433	47.0833	-0.652982	0.652982	0.00133329	0.0454283	no
comp9865_c0	comp9865_c0_seq1,comp9865_c0_seq2,comp9865_c0_seq3,comp9865_c0_seq4	3160	3073.25	-	-	-	-	-	-	1260.39	1253.73	843.33	1798.6	1648.22	1830.42	9.36	10.52	8.12	16.6	18.13	17.17	1119.15	1759.08	9.33333	17.3	-0.890308	0.890308	0.00134207	0.0454283	no
comp13148_c0	comp13148_c0_seq1,comp13148_c0_seq2,comp13148_c0_seq3,comp13148_c0_seq4,comp13148_c0_seq5,comp13148_c0_seq6,comp13148_c0_seq7,comp13148_c0_seq8	2983	2684.37	-	-	-	-	-	-	429.63	324	308	486.89	453.25	470	3.64	3.05	3.23	5.17	5.63	5.05	353.877	470.047	3.30667	5.28333	-0.676071	0.676071	0.00135261	0.0455923	no
comp20015_c0	comp20015_c0_seq1	1052	1052	-	-	-	[S] Function unknown	-	-	1991.97	1630.01	1630.64	869.16	767.86	971.53	45.44	42.06	47.48	24.74	25.91	28	1750.87	869.517	44.9933	26.2167	0.779227	0.779227	0.00135417	0.0456102	no
comp6014_c0	comp6014_c0_seq1,comp6014_c0_seq2	3983	2000.6	Q39140	plant G-box-binding factor	GO:0005634(nucleus);GO:0016787(hydrolase activity);GO:0046872(metal ion binding);GO:0046983(protein dimerization activity);GO:0043565(sequence-specific DNA binding);GO:0003700(sequence-specific DNA binding transcription factor activity);GO:0009410(respons	-	K09060	-	818.35	773.28	817.71	1836.69	1286.46	1461.68	10.24	10.98	13.17	23.5	21.03	20.47	803.113	1528.28	11.4633	21.6667	-0.918451	0.918451	0.00136293	0.0457768	no
comp22683_c0	comp22683_c0_seq1	1034	1034	-	-	-	-	-	-	1343.29	1121.13	1118.91	722.02	532.03	661.01	31.22	29.47	33.19	20.94	18.29	19.41	1194.44	638.353	31.2933	19.5467	0.678933	0.678933	0.00137794	0.0458281	no
comp13033_c0	comp13033_c0_seq1,comp13033_c0_seq2,comp13033_c0_seq3,comp13033_c0_seq4,comp13033_c0_seq5,comp13033_c0_seq6,comp13033_c0_seq7,comp13033_c0_seq8	1847	1775.36	Q5I0K7	beta-1,4-N-acetylglucosaminyltransferase	GO:0005783(endoplasmic reticulum);GO:0030246(carbohydrate binding);GO:0004577(N-acetylglucosaminyldiphosphodolichol N-acetylglucosaminyltransferase activity);GO:0030259(lipid glycosylation)	[R] General function prediction only	K07432	ko00510(N-Glycan biosynthesis)	414	394.43	302.21	543	459.08	517.99	5.49	5.83	5.06	8.8	8.91	8.58	370.213	506.69	5.46	8.76333	-0.682579	0.682579	0.00137297	0.0458281	no
comp12079_c0	comp12079_c0_seq1,comp12079_c0_seq2,comp12079_c0_seq3	1631	1549.2	Q9LM02	sterol 24-C-methyltransferase	GO:0009506(plasmodesma);GO:0005773(vacuole);GO:0003838(sterol 24-C-methyltransferase activity);GO:0009793(embryo development ending in seed dormancy);GO:0016126(sterol biosynthetic process)	[I] Lipid transport and metabolism ;[R] General function prediction only	K00559	ko00100(Steroid biosynthesis)	22893.6	20802.2	19282.4	8680.02	9427.51	9333.26	345.85	356.07	372.31	163.22	210.43	177.84	20992.7	9146.93	358.077	183.83	0.961896	0.961896	0.00137869	0.0458281	no
comp20660_c0	comp20660_c0_seq1	692	692	Q4V8W7	-	-	[S] Function unknown	-	-	1566.08	1468.21	1413.93	586.03	636.73	758.58	56.53	59.95	65.15	26.4	33.99	34.6	1482.74	660.447	60.5433	31.6633	0.935155	0.935155	0.0013786	0.0458281	no
comp14765_c0	comp14765_c0_seq1,comp14765_c0_seq2,comp14765_c0_seq3,comp14765_c0_seq4,comp14765_c0_seq5,comp14765_c0_seq6	3301	2088.7	Q9URY3	-	GO:0005829(cytosol);GO:0005097(Rab GTPase activator activity)	[R] General function prediction only	-	-	432.69	477.3	341.94	785.66	668.99	789.14	5.05	6.17	5.18	10.38	10.6	10.92	417.31	747.93	5.46667	10.6333	-0.959861	0.959861	0.00137942	0.0458281	no
comp11811_c0	comp11811_c0_seq1,comp11811_c0_seq2,comp11811_c0_seq3,comp11811_c0_seq4	4343	4156.97	Q94JM3	-	GO:0005634(nucleus);GO:0046983(protein dimerization activity);GO:0043565(sequence-specific DNA binding);GO:0009734(auxin mediated signaling pathway);GO:0010227(floral organ abscission);GO:0010047(fruit dehiscence);GO:0010150(leaf senescence);GO:0008285(ne	-	-	-	11380.2	8098.7	9033.4	15959.6	12067.2	15281.8	62.2	50	63.1	108.56	97.06	104.98	9504.11	14436.2	58.4333	103.533	-0.825232	0.825232	0.00138343	0.0459193	no
comp8517_c0	comp8517_c0_seq1,comp8517_c0_seq2	3048	3037.41	P93422	histidyl-tRNA synthetase	GO:0005737(cytoplasm);GO:0016841(ammonia-lyase activity);GO:0005524(ATP binding);GO:0004821(histidine-tRNA ligase activity);GO:0006427(histidyl-tRNA aminoacylation)	[J] Translation, ribosomal structure and biogenesis	K01892	ko00970(Aminoacyl-tRNA biosynthesis)	3852.42	2907.73	2813.32	4585.88	4318.74	4520.34	28.95	24.74	27.05	43.29	48.13	43.05	3191.16	4474.99	26.9133	44.8233	-0.735929	0.735929	0.00138672	0.0459964	no
comp9617_c0	comp9617_c0_seq1,comp9617_c0_seq2,comp9617_c0_seq3,comp9617_c0_seq4	2352	2228.93	Q9S7G7	myb proto-oncogene protein, plant	GO:0005634(nucleus);GO:0003677(DNA binding);GO:0003713(transcription coactivator activity);GO:0006355(regulation of transcription, DNA-dependent)	[K] Transcription	K09422	-	1018.88	1006.75	771.95	1237.29	1066.17	1322.27	10.49	11.81	10.12	15.92	16.33	17.13	932.527	1208.58	10.8067	16.46	-0.607043	0.607043	0.00139054	0.0460622	no
comp18918_c0	comp18918_c0_seq1	1768	1768	Q9SKI2	charged multivesicular body protein 2A	-	[U] Intracellular trafficking, secretion, and vesicular transport	K12191	ko04144(Endocytosis)	5616.21	4737.43	4402.78	3065.33	2347.83	2596.47	73.96	70.57	74.01	50.37	45.73	43.2	4918.81	2669.88	72.8467	46.4333	0.649702	0.649702	0.00139828	0.0461365	no
comp22343_c0	comp22343_c0_seq1	1682	1682	-	-	-	-	-	-	1457.17	1287.19	1214.95	777.17	658.96	873.01	20.22	20.2	21.52	13.45	13.52	15.3	1319.77	769.713	20.6467	14.09	0.551237	0.551237	0.00140935	0.0461414	no
comp17882_c0	comp17882_c0_seq1	665	665	-	-	-	[R] General function prediction only	-	-	6896.46	5581.96	5048.64	2909.42	3003.49	3204.49	260.33	238.33	243.26	137.04	167.68	152.84	5842.35	3039.13	247.307	152.52	0.697303	0.697303	0.00140916	0.0461414	no
comp20658_c0	comp20658_c0_seq1	2980	2980	Q9ZVH4	cullin 3	GO:0031461(cullin-RING ubiquitin ligase complex);GO:0005829(cytosol);GO:0031625(ubiquitin protein ligase binding);GO:0009793(embryo development ending in seed dormancy);GO:0009960(endosperm development);GO:0009911(positive regulation of flower development	[D] Cell cycle control, cell division, chromosome partitioning	K03869	ko04120(Ubiquitin mediated proteolysis)	2757.28	2612.15	1914.51	3242.96	2988.16	3504.65	21.17	22.68	18.76	31.07	33.93	33.99	2427.98	3245.26	20.87	32.9967	-0.66089	0.66089	0.00140799	0.0461414	no
comp10763_c0	comp10763_c0_seq1,comp10763_c0_seq2,comp10763_c0_seq3,comp10763_c0_seq4	4595	2655.34	-	-	-	-	-	-	188	170.02	131.12	400.04	337.07	339	2.75	2.14	2.51	5.3	4.73	4.55	163.047	358.703	2.46667	4.86	-0.978394	0.978394	0.00143684	0.0463223	no
comp16675_c3	comp16675_c3_seq1,comp16675_c3_seq10,comp16675_c3_seq11,comp16675_c3_seq12,comp16675_c3_seq13,comp16675_c3_seq14,comp16675_c3_seq15,comp16675_c3_seq16,comp16675_c3_seq17,comp16675_c3_seq18,comp16675_c3_seq19,comp16675_c3_seq2,comp16675_c3_seq20,comp16675_	4491	1796.67	-	-	-	[R] General function prediction only	-	-	2046.19	1954.43	1678.42	4245.29	2922.73	3403.18	34.5	34.63	35.62	60.88	57.37	57	1893.01	3523.73	34.9167	58.4167	-0.742464	0.742464	0.00145388	0.0463223	no
comp21092_c0	comp21092_c0_seq1	1391	1391	-	-	-	-	-	-	2139.87	2145.81	1835.35	1190.04	943.93	1009.91	36.25	41.11	39.68	25.15	23.65	21.61	2040.34	1047.96	39.0133	23.47	0.733149	0.733149	0.00145504	0.0463223	no
comp7374_c0	comp7374_c0_seq1	255	255	-	-	-	-	-	-	55.02	44.01	37	24	17	19	6.78	6.13	5.82	3.69	3.1	2.96	45.3433	20	6.24333	3.25	0.941877	0.941877	0.00143527	0.0463223	no
comp21678_c0	comp21678_c0_seq1	1197	1197	-	-	-	-	-	-	2396.44	1936.54	2019.44	831.01	917.49	971.76	47.61	43.51	51.21	20.6	26.96	24.39	2117.47	906.753	47.4433	23.9833	0.984173	0.984173	0.00144286	0.0463223	no
comp11412_c0	comp11412_c0_seq1,comp11412_c0_seq2,comp11412_c0_seq3,comp11412_c0_seq4	2320	1508.93	Q9LND7	ApaG protein	GO:0019005(SCF ubiquitin ligase complex);GO:0005515(protein binding)	[P] Inorganic ion transport and metabolism	K06195	-	7085.68	6137.51	6133.62	3075.94	2975.1	3609.84	120.88	114.25	131.6	58.34	70.44	74	6452.27	3220.29	122.243	67.5933	0.854803	0.854803	0.0014215	0.0463223	no
comp19276_c0	comp19276_c0_seq1	2100	2100	Q9LF46	-	GO:0005829(cytosol);GO:0016831(carboxy-lyase activity);GO:0000287(magnesium ion binding);GO:0030976(thiamine pyrophosphate binding);GO:0016740(transferase activity)	[E] Amino acid transport and metabolism ;[H] Coenzyme transport and metabolism	K01671	-	3909.88	3437.96	3396.45	1787.65	1719.69	1944.29	43.05	42.82	47.74	24.56	28.01	27.05	3581.43	1817.21	44.5367	26.54	0.746825	0.746825	0.0014629	0.0463223	no
comp5141_c1	comp5141_c1_seq1	1407	1407	-	-	-	-	-	-	1703.59	1713.5	1451.14	977.85	693.74	848.6	28.51	32.44	31	20.42	17.17	17.94	1622.74	840.063	30.65	18.51	0.727582	0.727582	0.00143634	0.0463223	no
comp12419_c0	comp12419_c0_seq1,comp12419_c0_seq2,comp12419_c0_seq3	2617	2499.29	Q9LNC4	bromodomain-containing protein 4	GO:0005634(nucleus);GO:0007049(cell cycle);GO:0009294(DNA mediated transformation);GO:0006355(regulation of transcription, DNA-dependent);GO:0048364(root development);GO:0006351(transcription, DNA-dependent)	[K] Transcription	K11722	-	1414.59	1332.68	1121.97	2434.14	1892.67	2125.32	13.13	14.35	13.28	28.37	26.35	25.33	1289.75	2150.71	13.5867	26.6833	-0.973747	0.973747	0.00145039	0.0463223	no
comp12678_c0	comp12678_c0_seq1,comp12678_c0_seq2,comp12678_c0_seq3,comp12678_c0_seq4,comp12678_c0_seq5	2196	1479.97	-	-	-	-	-	-	1750.28	1451.95	1417.08	2556.32	2238.11	2508.73	33.78	31.34	35.34	44.36	47.01	46.67	1539.77	2434.39	33.4867	46.0133	-0.458465	0.458465	0.00145461	0.0463223	no
comp11052_c0	comp11052_c0_seq1,comp11052_c0_seq2,comp11052_c0_seq3	2636	2575.81	A8R7E6	-	-	-	K00924	-	2062.68	1934.27	1790.13	2822.62	2441.57	2570.73	18.49	19.61	20.47	31.11	32.09	28.85	1929.03	2611.64	19.5233	30.6833	-0.652256	0.652256	0.00147429	0.0465528	no
comp13561_c0	comp13561_c0_seq1,comp13561_c0_seq2,comp13561_c0_seq3,comp13561_c0_seq4	2612	2391.5	-	-	-	-	-	-	425	453.07	338	585	541.18	659.94	4.21	5.19	4.51	7.49	8.01	8.6	405.357	595.373	4.63667	8.03333	-0.792911	0.792911	0.00147716	0.0465819	no
comp16851_c3	comp16851_c3_seq1,comp16851_c3_seq10,comp16851_c3_seq11,comp16851_c3_seq12,comp16851_c3_seq13,comp16851_c3_seq14,comp16851_c3_seq15,comp16851_c3_seq16,comp16851_c3_seq17,comp16851_c3_seq18,comp16851_c3_seq19,comp16851_c3_seq2,comp16851_c3_seq20,comp16851_	3097	1320.59	Q8L6Y1	ubiquitin carboxyl-terminal hydrolase 5/13	GO:0005829(cytosol);GO:0008242(omega peptidase activity);GO:0004221(ubiquitin thiolesterase activity);GO:0004843(ubiquitin-specific protease activity);GO:0008270(zinc ion binding);GO:0009793(embryo development ending in seed dormancy);GO:0016579(protein d	[O] Posttranslational modification, protein turnover, chaperones	K11836	-	9372.41	9504.34	7436.11	15821.2	12406.1	13184.8	169.31	204.16	186.49	380.9	368.48	329.33	8770.95	13804	186.653	359.57	-0.945911	0.945911	0.00148373	0.0466642	no
comp18187_c0	comp18187_c0_seq1	2661	2661	-	-	-	-	-	-	3118.47	2756.66	3151.87	5643.4	4223.44	5107.11	26.89	26.89	34.69	60.73	53.87	55.65	3009	4991.32	29.49	56.75	-0.944395	0.944395	0.00148463	0.0466642	no
comp24779_c0	comp24779_c0_seq1	893	893	-	DNA-directed RNA polymerase II subunit H	-	[K] Transcription	K03016	ko00230(Purine metabolism);ko00240(Pyrimidine metabolism);ko03020(RNA polymerase);ko05016(Huntington's disease)	666.24	570.78	553.96	273.65	256.78	342.62	18.15	17.59	19.26	9.3	10.35	11.79	596.993	291.017	18.3333	10.48	0.80683	0.80683	0.00148907	0.046672	no
comp16716_c0	comp16716_c0_seq1,comp16716_c0_seq10,comp16716_c0_seq11,comp16716_c0_seq12,comp16716_c0_seq13,comp16716_c0_seq14,comp16716_c0_seq15,comp16716_c0_seq16,comp16716_c0_seq17,comp16716_c0_seq18,comp16716_c0_seq19,comp16716_c0_seq2,comp16716_c0_seq20,comp16716_	3122	1199.39	P53611	protein geranylgeranyltransferase type II	GO:0046872(metal ion binding);GO:0005515(protein binding);GO:0004663(Rab geranylgeranyltransferase activity);GO:0006464(protein modification process);GO:0007601(visual perception)	[O] Posttranslational modification, protein turnover, chaperones	K05956	-	500.9	404.01	397.61	805.1	653.57	753.87	13.02	11.17	11.83	18.5	17.29	18.12	434.173	737.513	12.0067	17.97	-0.581755	0.581755	0.00148974	0.046672	no
comp16731_c0	comp16731_c0_seq1,comp16731_c0_seq2	1555	1500.36	-	palmitoyl-protein thioesterase	-	[I] Lipid transport and metabolism ;[O] Posttranslational modification, protein turnover, chaperones	K01074	ko00062(Fatty acid elongation in mitochondria);ko04142(Lysosome)	1901.92	1876.88	1616.23	2340.57	2047.21	2170.97	29.69	33.04	32.13	45.89	47.29	42.86	1798.34	2186.25	31.62	45.3467	-0.520159	0.520159	0.00150001	0.0468827	no
comp18095_c0	comp18095_c0_seq1	988	988	-	-	-	-	-	-	4530.23	3728.55	3694.68	2204.97	2142.91	2373.08	110.58	102.94	115.11	67.16	77.36	73.18	3984.49	2240.32	109.543	72.5667	0.594123	0.594123	0.00151336	0.0469055	no
comp18060_c0	comp18060_c0_seq1	930	930	-	-	-	-	-	-	4013.93	3638.65	3308.52	1865.04	1743.71	2171.81	104.61	107.26	110.07	60.65	67.21	71.52	3653.7	1926.85	107.313	66.46	0.691271	0.691271	0.00153022	0.0469055	no
comp6003_c0	comp6003_c0_seq1,comp6003_c0_seq2	2382	1918.3	Q9S7T8	serpin peptidase inhibitor, clade A, member 3	GO:0048046(apoplast);GO:0004869(cysteine-type endopeptidase inhibitor activity);GO:0004867(serine-type endopeptidase inhibitor activity)	[V] Defense mechanisms	K04525	-	667.86	690.19	494.86	1054.89	831.74	1100.92	8.23	9.51	7.99	14.47	13.84	15.84	617.637	995.85	8.57667	14.7167	-0.778962	0.778962	0.00152409	0.0469055	no
comp19489_c0	comp19489_c0_seq1	1252	1252	O80575	riboflavin synthase beta chain	GO:0009570(chloroplast stroma);GO:0009349(riboflavin synthase complex);GO:0000906(6,7-dimethyl-8-ribityllumazine synthase activity);GO:0004746(riboflavin synthase activity);GO:0009867(jasmonic acid mediated signaling pathway);GO:0009231(riboflavin biosynt	[H] Coenzyme transport and metabolism	K00794	ko00740(Riboflavin metabolism)	2537.68	2335.6	1790.8	888.95	982.76	1114	48.06	50.03	43.29	21.01	27.53	26.66	2221.36	995.237	47.1267	25.0667	0.910773	0.910773	0.00152381	0.0469055	no
comp12807_c0	comp12807_c0_seq1,comp12807_c0_seq2,comp12807_c0_seq3,comp12807_c0_seq4	4131	3917.18	P42158	casein kinase 1	GO:0005737(cytoplasm);GO:0009506(plasmodesma);GO:0005524(ATP binding);GO:0004674(protein serine/threonine kinase activity)	[T] Signal transduction mechanisms	K02218	ko04340(Hedgehog signaling pathway);ko04711(Circadian rhythm - fly)	3981	3917.47	3285.83	4330.4	4024.46	4595.01	22.93	25.61	24.17	31.73	34.7	33.74	3728.1	4316.62	24.2367	33.39	-0.462225	0.462225	0.00152316	0.0469055	no
comp7538_c0	comp7538_c0_seq1	2341	2341	-	-	-	[R] General function prediction only	-	-	714.71	790.04	695.82	1190.04	1179.97	1284.95	7.03	8.79	8.74	14.61	17.17	15.98	733.523	1218.32	8.18667	15.92	-0.959492	0.959492	0.00150554	0.0469055	no
comp17718_c0	comp17718_c0_seq1	733	733	-	-	-	-	-	-	6493.02	5453.22	5175.41	2651.99	2257.77	3193.22	219.81	208.81	223.64	112.02	113.04	136.58	5707.22	2700.99	217.42	120.547	0.850893	0.850893	0.00151657	0.0469055	no
comp12388_c0	comp12388_c0_seq1,comp12388_c0_seq2,comp12388_c0_seq3	1462	1277.79	-	-	-	-	-	-	541.39	576.51	450.47	766.2	624.13	710.99	9.88	11.88	10.49	17.89	17.19	16.51	522.79	700.44	10.75	17.1967	-0.677792	0.677792	0.00150391	0.0469055	no
comp2817_c0	comp2817_c0_seq1,comp2817_c0_seq2	1699	1620	Q6NUK1	solute carrier family 25 (mitochondrial carrier; adenine nucleotide translocator)	GO:0016021(integral to membrane);GO:0005743(mitochondrial inner membrane);GO:0005509(calcium ion binding);GO:0055085(transmembrane transport)	[C] Energy production and conversion	K05863	ko04020(Calcium signaling pathway);ko05012(Parkinson's disease);ko05016(Huntington's disease)	544	595.49	452.68	761	702.62	812.4	7.87	9.74	8.38	13.67	15.04	14.79	530.723	758.673	8.66333	14.5	-0.743059	0.743059	0.00153452	0.0469198	no
comp11009_c0	comp11009_c0_seq1,comp11009_c0_seq2,comp11009_c0_seq3	1681	1640.77	-	-	-	-	-	-	2559.38	2294.59	1859.72	1127.47	1043.93	1368.58	36.41	36.96	33.91	19.67	21.57	24.21	2237.9	1179.99	35.76	21.8167	0.712916	0.712916	0.00154255	0.0470072	no
comp20797_c0	comp20797_c0_seq1	1325	1325	P42620	putative glutathione S-transferase	-	[O] Posttranslational modification, protein turnover, chaperones	K07393	-	3221.32	2728.95	2777.25	1288.38	1122	1627	57.45	55.05	63.22	28.67	29.59	36.66	2909.17	1345.79	58.5733	31.64	0.888494	0.888494	0.00154396	0.0470201	no
comp7903_c0	comp7903_c0_seq1,comp7903_c0_seq2	1926	1887.67	Q38826	-	GO:0005737(cytoplasm);GO:0005634(nucleus);GO:0046983(protein dimerization activity);GO:0009734(auxin mediated signaling pathway);GO:0006355(regulation of transcription, DNA-dependent);GO:0006351(transcription, DNA-dependent)	-	-	-	7717.52	6725.99	5271.52	3101.58	3046.88	3098.09	93.74	92.36	82.03	47.24	55.96	48.59	6571.68	3082.18	89.3767	50.5967	0.820856	0.820856	0.00154962	0.0471029	no
comp16939_c0	comp16939_c0_seq1,comp16939_c0_seq10,comp16939_c0_seq11,comp16939_c0_seq12,comp16939_c0_seq13,comp16939_c0_seq14,comp16939_c0_seq15,comp16939_c0_seq16,comp16939_c0_seq17,comp16939_c0_seq18,comp16939_c0_seq19,comp16939_c0_seq2,comp16939_c0_seq20,comp16939_	3706	2209.04	Q5ZJ25	-	GO:0005794(Golgi apparatus);GO:0006869(lipid transport);GO:0015031(protein transport)	[S] Function unknown	-	-	2951.77	2580.8	2578.5	4375.64	4127.98	4679.52	33.24	32.29	37.22	57.96	66.43	63.81	2703.69	4394.38	34.25	62.7333	-0.873128	0.873128	0.00155605	0.0471832	no
comp4560_c1	comp4560_c1_seq1	640	640	Q05737	Rab family, other	GO:0005886(plasma membrane);GO:0005525(GTP binding);GO:0015031(protein transport);GO:0007264(small GTPase mediated signal transduction)	[T] Signal transduction mechanisms ;[U] Intracellular trafficking, secretion, and vesicular transport	K07976	-	2178.39	1856.95	1780.4	765.83	797.09	990	85.86	82.79	89.58	37.67	46.47	49.3	1938.58	850.973	86.0767	44.48	0.952465	0.952465	0.00155847	0.0471832	no
comp16570_c1	comp16570_c1_seq1,comp16570_c1_seq2,comp16570_c1_seq3	3616	2454.36	-	-	-	-	-	-	553.79	488.84	424.46	920.2	867.77	885.89	6.78	7.44	7.15	11.74	13.03	12.01	489.03	891.287	7.12333	12.26	-0.783335	0.783335	0.00155914	0.0471832	no
comp12821_c0	comp12821_c0_seq1,comp12821_c0_seq2,comp12821_c0_seq3,comp12821_c0_seq4,comp12821_c0_seq5,comp12821_c0_seq6	2685	2210.27	-	DnaJ homolog, subfamily C, member 7	-	[B] Chromatin structure and dynamics	K09527	-	564.34	520	434.3	811.44	729.16	742.94	6.92	6.44	7.06	10.84	11.3	10.15	506.213	761.18	6.80667	10.7633	-0.661105	0.661105	0.00156822	0.0473385	no
comp4097_c0	comp4097_c0_seq1	1262	1262	P93212	tyrosine 3-monooxygenase/tryptophan 5-monooxygenase activation protein	GO:0019904(protein domain specific binding)	[O] Posttranslational modification, protein turnover, chaperones	K06630	ko04110(Cell cycle);ko04114(Oocyte meiosis);ko04722(Neurotrophin signaling pathway)	7215.37	5812.19	5429.53	3187.92	2090.64	3133.48	135.5	123.46	130.15	74.7	58.06	74.35	6152.36	2804.01	129.703	69.0367	0.909781	0.909781	0.00156746	0.0473385	no
comp15837_c1	comp15837_c1_seq1,comp15837_c1_seq10,comp15837_c1_seq11,comp15837_c1_seq12,comp15837_c1_seq13,comp15837_c1_seq14,comp15837_c1_seq15,comp15837_c1_seq16,comp15837_c1_seq17,comp15837_c1_seq18,comp15837_c1_seq2,comp15837_c1_seq3,comp15837_c1_seq4,comp15837_c1	4234	2634.64	P42158	casein kinase 1, alpha	GO:0005737(cytoplasm);GO:0009506(plasmodesma);GO:0005524(ATP binding);GO:0004674(protein serine/threonine kinase activity)	[T] Signal transduction mechanisms	K08957	ko04310(Wnt signaling pathway);ko04340(Hedgehog signaling pathway)	3197.81	2689.12	2790.1	4741.05	3933.22	4647.24	32.01	32.16	34.16	52.24	52.65	57.05	2892.34	4440.5	32.7767	53.98	-0.719756	0.719756	0.00157212	0.0473557	no
comp23888_c0	comp23888_c0_seq1	1351	1351	Q9M2C9	-	GO:0009409(response to cold)	[R] General function prediction only	-	-	1007.9	876.01	871.4	446.46	465.32	453.82	17.61	17.31	19.43	9.73	12.02	10.02	918.437	455.2	18.1167	10.59	0.774615	0.774615	0.00157845	0.0474089	no
comp27909_c0	comp27909_c0_seq1	2476	2476	Q940Z2	actin-related protein 5	GO:0005737(cytoplasm);GO:0005654(nucleoplasm);GO:0030029(actin filament-based process);GO:0006281(DNA repair);GO:0007275(multicellular organismal development)	[Z] Cytoskeleton	K11672	-	692.52	496.01	442.74	840.71	800.74	825.16	6.43	5.21	5.25	9.74	11	9.68	543.757	822.203	5.63	10.14	-0.848851	0.848851	0.00158316	0.0474243	no
comp64701_c0	comp64701_c0_seq1	551	551	-	-	-	-	-	-	35	32	22	54	39	52	1.64	1.69	1.31	3.15	2.7	3.07	29.6667	48.3333	1.54667	2.97333	-0.942919	0.942919	0.00159259	0.0475066	no
comp20629_c0	comp20629_c0_seq1	1252	1252	Q5EA37	-	-	[S] Function unknown	-	-	2326.07	1979.98	2046.15	886.74	809.01	1109	44.05	42.41	49.46	20.95	22.66	26.54	2117.4	934.917	45.3067	23.3833	0.954243	0.954243	0.0015985	0.0475257	no
comp23376_c0	comp23376_c0_seq1	3809	3809	Q96JG6	-	-	[S] Function unknown	-	-	1053.16	1134.23	811.2	1457.05	1384.47	1549.99	6.29	7.66	6.18	10.86	12.23	11.7	999.53	1463.84	6.71	11.5967	-0.789326	0.789326	0.00159643	0.0475257	no
comp18580_c0	comp18580_c0_seq1	1084	1084	-	-	-	-	-	-	1393.55	1313.56	1176.08	853.52	720.99	893	30.78	32.82	33.16	23.52	23.55	24.92	1294.4	822.503	32.2533	23.9967	0.426614	0.426614	0.00159526	0.0475257	no
comp8937_c0	comp8937_c0_seq1,comp8937_c0_seq2	2030	2016.64	-	-	-	-	-	-	2244.23	2271.76	1996.43	2954.39	2485.65	2775.16	25.67	29.45	29.11	42.5	42.39	40.27	2170.81	2738.4	28.0767	41.72	-0.571367	0.571367	0.00159976	0.0475257	no
comp17442_c0	comp17442_c0_seq1	1736	1736	O81127	-	-	[A] RNA processing and modification	-	-	10290.2	8363.9	8033.76	5806.57	4867.24	5015.09	138.13	126.99	137.65	97.26	96.63	85.06	8895.96	5229.63	134.257	92.9833	0.52995	0.52995	0.00160017	0.0475257	no
comp13289_c0	comp13289_c0_seq1,comp13289_c0_seq2,comp13289_c0_seq3,comp13289_c0_seq4,comp13289_c0_seq5	1463	1378.73	-	-	-	-	-	-	488.99	514.24	394.76	673.82	626.03	648.76	8.47	9.96	8.76	14.12	15.64	13.95	465.997	649.537	9.06333	14.57	-0.684887	0.684887	0.00161015	0.0477337	no
comp17803_c0	comp17803_c0_seq1	787	787	Q09896	-	GO:0005739(mitochondrion)	[S] Function unknown	-	-	5476.04	4899.58	4707.63	2078.97	1808.26	2693.77	171.34	173.4	188.02	81.17	83.68	106.49	5027.75	2193.67	177.587	90.4467	0.973384	0.973384	0.00161208	0.0477486	no
comp8701_c0	comp8701_c0_seq1	2018	2018	Q12874	-	GO:0071013(catalytic step 2 spliceosome);GO:0016607(nuclear speck);GO:0003676(nucleic acid binding);GO:0008270(zinc ion binding);GO:0000389(nuclear mRNA 3'-splice site recognition)	[A] RNA processing and modification	-	-	1295	1217.25	882.79	1528.1	1449.58	1630.8	14.86	15.8	12.93	21.88	24.6	23.65	1131.68	1536.16	14.53	23.3767	-0.686035	0.686035	0.00161631	0.0477486	no
comp17987_c0	comp17987_c0_seq1	1697	1697	-	-	-	-	-	-	5483.09	4762.97	4474.27	3613.31	2919.66	3514.82	75.37	74.05	78.5	61.97	59.36	61.04	4906.78	3349.26	75.9733	60.79	0.321659	0.321659	0.00161894	0.0477876	no
comp23413_c0	comp23413_c0_seq1	931	931	-	-	-	[S] Function unknown	-	-	999.39	924.3	825.01	595.04	438.92	520.38	26.02	27.22	27.41	19.33	16.9	17.12	916.233	518.113	26.8833	17.7833	0.596186	0.596186	0.00162019	0.047795	no
comp19081_c0	comp19081_c0_seq1	2246	2246	O80345	cell cycle related kinase	GO:0005829(cytosol);GO:0005634(nucleus);GO:0005524(ATP binding);GO:0019912(cyclin-dependent protein kinase activating kinase activity);GO:0004693(cyclin-dependent protein kinase activity);GO:0005515(protein binding);GO:0008353(RNA polymerase II carboxy-te	[R] General function prediction only	K08817	-	8633.53	8093.84	6470.68	3655.5	3724.63	4451.75	88.68	94.03	84.84	46.85	56.58	57.77	7732.68	3943.96	89.1833	53.7333	0.730957	0.730957	0.00162912	0.0479281	no
comp5442_c0	comp5442_c0_seq1,comp5442_c0_seq2	2510	2451.07	-	MAternally affected uncoordination	-	[S] Function unknown	K11266	-	899.04	867.01	771.53	1317.18	1108.15	1207.82	8.38	9.09	9.3	16.33	15.75	14.51	845.86	1211.05	8.92333	15.53	-0.799403	0.799403	0.00163348	0.0479297	no
comp15587_c0	comp15587_c0_seq1,comp15587_c0_seq10,comp15587_c0_seq2,comp15587_c0_seq3,comp15587_c0_seq4,comp15587_c0_seq5,comp15587_c0_seq6,comp15587_c0_seq7,comp15587_c0_seq8,comp15587_c0_seq9	1939	1640.6	Q9LHJ9	protein phosphatase	GO:0008287(protein serine/threonine phosphatase complex);GO:0046872(metal ion binding);GO:0004722(protein serine/threonine phosphatase activity);GO:0006470(protein dephosphorylation)	[T] Signal transduction mechanisms	K01090	-	545.16	575.86	526.03	1062.26	841.1	879.88	8.12	9.52	10.24	18.53	17.28	15.84	549.017	927.747	9.29333	17.2167	-0.889538	0.889538	0.00163795	0.0479946	no
comp17905_c0	comp17905_c0_seq1	1001	1001	Q6NPF9	protein disulfide-isomerase	GO:0009570(chloroplast stroma);GO:0009055(electron carrier activity);GO:0008047(enzyme activator activity);GO:0016671(oxidoreductase activity, acting on a sulfur group of donors, disulfide as acceptor);GO:0015035(protein disulfide oxidoreductase activity)	[O] Posttranslational modification, protein turnover, chaperones	K01829	-	3617.32	3069.46	2694.38	1622.63	1520.97	1887.95	87.05	83.55	82.77	48.73	54.14	57.41	3127.05	1677.18	84.4567	53.4267	0.660651	0.660651	0.00164324	0.0480323	no
comp12757_c0	comp12757_c0_seq1,comp12757_c0_seq2,comp12757_c0_seq3,comp12757_c0_seq4	3595	3231.85	-	dihydroflavonol-4-reductase	-	[V] Defense mechanisms	K00091	ko00941(Flavonoid biosynthesis)	2402.5	2349.5	1687.38	3155.31	2634.38	3306.42	17.13	18.82	15.27	27.59	27.11	29.34	2146.46	3032.04	17.0733	28.0133	-0.714369	0.714369	0.00165385	0.0481518	no
comp14663_c0	comp14663_c0_seq1,comp14663_c0_seq2,comp14663_c0_seq3,comp14663_c0_seq4,comp14663_c0_seq5,comp14663_c0_seq6,comp14663_c0_seq7	3884	3452.24	Q9LIE5	-	GO:0005634(nucleus);GO:0004553(hydrolase activity, hydrolyzing O-glycosyl compounds);GO:0003700(sequence-specific DNA binding transcription factor activity);GO:0008270(zinc ion binding);GO:0005975(carbohydrate metabolic process);GO:0007623(circadian rhyth	-	-	-	2260.34	2280.15	1736.37	3281.94	2599.1	2847.08	14.69	16.69	14.63	27.75	25.66	24.3	2092.29	2909.37	15.3367	25.9033	-0.756153	0.756153	0.00168095	0.048282	no
comp6313_c0	comp6313_c0_seq1,comp6313_c0_seq2	2906	2811.57	P19684	TatD DNase family protein	GO:0009507(chloroplast);GO:0030529(ribonucleoprotein complex);GO:0000166(nucleotide binding);GO:0003723(RNA binding);GO:0006397(mRNA processing)	[L] Replication, recombination and repair	K03424	-	4252.51	3548.96	3084.1	2445.79	2050.48	2128.02	34.7	32.79	32.12	24.76	24.57	21.87	3628.52	2208.1	33.2033	23.7333	0.484413	0.484413	0.00166318	0.048282	no
comp19691_c0	comp19691_c0_seq1	1216	1216	Q99614	peptidyl-prolyl isomerase D (cyclophilin D)	GO:0051082(unfolded protein binding);GO:0006457(protein folding)	[R] General function prediction only	K05864	ko04020(Calcium signaling pathway);ko05012(Parkinson's disease);ko05016(Huntington's disease)	2880.7	2718.64	2565.05	1285.88	1108.65	1591.73	56.28	60.07	63.96	31.34	32.03	39.29	2721.46	1328.75	60.1033	34.22	0.812605	0.812605	0.00167105	0.048282	no
comp21087_c0	comp21087_c0_seq1	1468	1468	-	-	-	-	-	-	616.98	544.4	524.09	688.99	628.16	676.21	9.87	9.85	10.71	13.76	14.87	13.67	561.823	664.453	10.1433	14.1	-0.475163	0.475163	0.00168015	0.048282	no
comp18839_c0	comp18839_c0_seq1	1039	1039	Q8L7A4	-	GO:0008060(ARF GTPase activator activity);GO:0008270(zinc ion binding);GO:0032312(regulation of ARF GTPase activity)	[R] General function prediction only	-	-	4359.34	3674.89	3241.53	1934.47	1582.15	2205.76	100.78	96.1	95.66	55.8	54.1	64.43	3758.59	1907.46	97.5133	58.11	0.746813	0.746813	0.00166774	0.048282	no
comp16909_c0	comp16909_c0_seq1,comp16909_c0_seq10,comp16909_c0_seq11,comp16909_c0_seq12,comp16909_c0_seq13,comp16909_c0_seq14,comp16909_c0_seq2,comp16909_c0_seq3,comp16909_c0_seq4,comp16909_c0_seq5,comp16909_c0_seq6,comp16909_c0_seq7,comp16909_c0_seq8,comp16909_c0_seq	4277	3168.28	-	-	-	-	-	-	3145.2	2857.59	2771.65	4502.31	3671.47	4120.7	21.55	23.21	25.02	40.45	39.52	35.68	2924.81	4098.16	23.26	38.55	-0.72888	0.72888	0.00167553	0.048282	no
comp22584_c0	comp22584_c0_seq1	1104	1104	-	-	-	[S] Function unknown	-	-	1002.7	895.78	803.15	512.69	466.02	559	21.72	21.95	22.2	13.86	14.93	15.3	900.543	512.57	21.9567	14.6967	0.57917	0.57917	0.00167015	0.048282	no
comp20925_c0	comp20925_c0_seq1	3719	3719	Q0JDM0	-	GO:0003677(DNA binding);GO:0000166(nucleotide binding);GO:0003723(RNA binding);GO:0008270(zinc ion binding)	[R] General function prediction only	-	-	1273.61	1093.46	1074.89	2171.99	1616.99	2022.03	7.8	7.57	8.4	16.59	14.64	15.64	1147.32	1937	7.92333	15.6233	-0.979523	0.979523	0.00167782	0.048282	no
comp15426_c1	comp15426_c1_seq1,comp15426_c1_seq10,comp15426_c1_seq2,comp15426_c1_seq3,comp15426_c1_seq4,comp15426_c1_seq5,comp15426_c1_seq6,comp15426_c1_seq7,comp15426_c1_seq8,comp15426_c1_seq9	3569	1850.06	Q9SS94	vesicle-fusing ATPase	GO:0005856(cytoskeleton);GO:0005634(nucleus);GO:0009524(phragmoplast);GO:0005524(ATP binding);GO:0017111(nucleoside-triphosphatase activity);GO:0007049(cell cycle);GO:0051301(cell division);GO:0015031(protein transport)	[I] Lipid transport and metabolism	K06027	ko04962(Vasopressin-regulated water reabsorption)	2186.71	1914.66	1914.06	3757.98	3213.58	3424.91	29.45	29.09	32.4	56.56	63.55	57.28	2005.14	3465.49	30.3133	59.13	-0.963938	0.963938	0.00168552	0.0482975	no
comp37449_c0	comp37449_c0_seq1	889	889	Q38831	-	GO:0005634(nucleus);GO:0046983(protein dimerization activity);GO:0009734(auxin mediated signaling pathway);GO:0006355(regulation of transcription, DNA-dependent);GO:0006351(transcription, DNA-dependent)	-	-	-	271	219	214.06	147	118.96	121.19	7.42	6.78	7.48	5.02	4.82	4.19	234.687	129.05	7.22667	4.67667	0.62785	0.62785	0.00169123	0.0483895	no
comp12460_c0	comp12460_c0_seq1,comp12460_c0_seq2,comp12460_c0_seq3,comp12460_c0_seq4,comp12460_c0_seq5,comp12460_c0_seq6	2458	1791.05	Q8S8S1	-	GO:0005789(endoplasmic reticulum membrane);GO:0016021(integral to membrane);GO:0005778(peroxisomal membrane);GO:0006633(fatty acid biosynthetic process);GO:0007031(peroxisome organization)	[U] Intracellular trafficking, secretion, and vesicular transport	-	-	1134.32	1084.8	1041.22	1540.18	1208.41	1513.57	14.96	16.08	17.63	24.74	22.82	24.55	1086.78	1420.72	16.2233	24.0367	-0.567167	0.567167	0.00170478	0.0484732	no
comp18525_c0	comp18525_c0_seq1	1487	1487	-	-	-	[I] Lipid transport and metabolism	-	-	7098.3	6283.23	5183.21	3734.88	2555.77	3283.37	112.07	112.21	104.46	73.58	59.68	65.5	6188.25	3191.34	109.58	66.2533	0.72592	0.72592	0.00171286	0.0485925	no
comp21570_c0	comp21570_c0_seq1	1300	1300	Q43582	-	GO:0005634(nucleus);GO:0030529(ribonucleoprotein complex);GO:0003723(RNA binding);GO:0006397(mRNA processing);GO:0008380(RNA splicing)	[A] RNA processing and modification	-	-	1910.32	1502.14	1400.44	803.07	810.05	945.13	34.76	30.92	32.53	18.23	21.8	21.73	1604.3	852.75	32.7367	20.5867	0.669197	0.669197	0.0017175	0.0485925	no
comp19185_c0	comp19185_c0_seq1	2686	2686	Q9FIE3	-	GO:0005634(nucleus);GO:0003677(DNA binding);GO:0005515(protein binding);GO:0008270(zinc ion binding);GO:0006355(regulation of transcription, DNA-dependent);GO:0001666(response to hypoxia);GO:0006351(transcription, DNA-dependent);GO:0010048(vernalization r	-	-	-	1966.06	1915.96	1803.9	2547.31	2420.6	2602.88	16.79	18.51	19.67	27.15	30.58	28.09	1895.31	2523.6	18.3233	28.6067	-0.642669	0.642669	0.00172247	0.0486878	no
comp4894_c0	comp4894_c0_seq1,comp4894_c0_seq2	4118	4056.79	-	-	-	-	-	-	907.23	807.8	614.43	1312.39	1093.7	1263.72	5.08	5.14	4.43	9.1	9.06	8.9	776.487	1223.27	4.88333	9.02	-0.885261	0.885261	0.00172467	0.0486986	no
comp2911_c0	comp2911_c0_seq1	1181	1181	-	-	-	-	-	-	725.96	656.92	637.61	272	313.09	313	14.63	14.97	16.4	6.84	9.33	7.97	673.497	299.363	15.3333	8.04667	0.930208	0.930208	0.00172521	0.0486986	no
comp14613_c0	comp14613_c0_seq1,comp14613_c0_seq2,comp14613_c0_seq3,comp14613_c0_seq4,comp14613_c0_seq5,comp14613_c0_seq6,comp14613_c0_seq7	1997	1468.59	-	-	-	-	-	-	721.85	610	534.06	826.04	721.93	768	12.33	11.89	11.16	17.88	17.19	16.14	621.97	771.99	11.7933	17.07	-0.533492	0.533492	0.00173694	0.0488664	no
comp8894_c0	comp8894_c0_seq1,comp8894_c0_seq2	3397	3253.72	F4I114	Cdc2-related kinase, arginine/serine-rich	-	[D] Cell cycle control, cell division, chromosome partitioning	K08819	-	2809.32	2201.74	2065.95	3297.88	3138.68	3579.91	19.77	17.5	18.54	28.73	32.4	31.54	2359	3338.82	18.6033	30.89	-0.731579	0.731579	0.00174581	0.0488734	no
comp25481_c0	comp25481_c0_seq1	1642	1642	-	-	-	[S] Function unknown	-	-	1016.57	852.86	724.68	450.27	402.91	538.47	14.46	13.73	13.16	7.99	8.48	9.68	864.703	463.883	13.7833	8.71667	0.661076	0.661076	0.00174957	0.048935	no
comp15203_c0	comp15203_c0_seq1,comp15203_c0_seq10,comp15203_c0_seq11,comp15203_c0_seq12,comp15203_c0_seq13,comp15203_c0_seq2,comp15203_c0_seq3,comp15203_c0_seq4,comp15203_c0_seq5,comp15203_c0_seq6,comp15203_c0_seq7,comp15203_c0_seq8,comp15203_c0_seq9	3144	1753.7	-	-	-	[T] Signal transduction mechanisms	-	-	803.37	839.99	564.29	1263.69	903.2	1055.66	10.79	12.68	10.47	19.43	20.68	17.91	735.883	1074.18	11.3133	19.34	-0.773564	0.773564	0.00175915	0.0489634	no
comp23938_c0	comp23938_c0_seq1	1179	1179	-	-	-	-	-	-	839.55	732.01	744.74	328.83	363.81	339	16.95	16.72	19.19	8.28	10.86	8.65	772.1	343.88	17.62	9.26333	0.927611	0.927611	0.00176669	0.0490422	no
comp12979_c0	comp12979_c0_seq1,comp12979_c0_seq2,comp12979_c0_seq3	4640	4454.62	Q9STV4	-	GO:0005886(plasma membrane);GO:0005524(ATP binding);GO:0004674(protein serine/threonine kinase activity);GO:0046777(protein autophosphorylation);GO:0009749(response to glucose stimulus);GO:0010167(response to nitrate);GO:0048364(root development);GO:00071	[T] Signal transduction mechanisms	K00924	-	2031.28	2083.66	1586.89	2629.42	2113.47	2786.1	10.39	11.98	10.34	16.75	15.9	17.93	1900.61	2509.66	10.9033	16.86	-0.628835	0.628835	0.00177355	0.0490696	no
comp18025_c0	comp18025_c0_seq1	3299	3299	Q9T0I8	S-adenosylhomocysteine/5'-methylthioadenosine nucleosidase	GO:0005829(cytosol);GO:0005886(plasma membrane);GO:0008782(adenosylhomocysteine nucleosidase activity);GO:0008930(methylthioadenosine nucleosidase activity);GO:0019509(L-methionine salvage from methylthioadenosine);GO:0009116(nucleoside metabolic process)	-	K01243	ko00270(Cysteine and methionine metabolism)	3714.46	3362.27	3357.81	1484.9	1378.92	1773.6	25.7	26.31	29.65	12.82	14.11	15.5	3478.18	1545.81	27.22	14.1433	0.944545	0.944545	0.00178742	0.0491822	no
comp4849_c0	comp4849_c0_seq1	1892	1892	Q6YZE8	-	GO:0005634(nucleus);GO:0003677(DNA binding);GO:0046872(metal ion binding);GO:0006355(regulation of transcription, DNA-dependent);GO:0006351(transcription, DNA-dependent)	-	-	-	1610.79	1567	1269.14	633.32	675.26	586	19.77	21.75	19.88	9.7	12.26	9.09	1482.31	631.527	20.4667	10.35	0.983645	0.983645	0.00179022	0.0492116	no
comp8383_c0	comp8383_c0_seq1,comp8383_c0_seq2	1098	1070.25	-	-	-	[T] Signal transduction mechanisms	-	-	241.99	175	218.12	380.86	340.01	343.99	5.48	4.46	6.25	10.59	11.26	9.75	211.703	354.953	5.39667	10.5333	-0.964822	0.964822	0.00182077	0.0494009	no
comp15951_c0	comp15951_c0_seq1,comp15951_c0_seq10,comp15951_c0_seq11,comp15951_c0_seq12,comp15951_c0_seq13,comp15951_c0_seq14,comp15951_c0_seq15,comp15951_c0_seq16,comp15951_c0_seq2,comp15951_c0_seq3,comp15951_c0_seq4,comp15951_c0_seq5,comp15951_c0_seq6,comp15951_c0_s	3846	3264.17	P07374	urease	GO:0016151(nickel ion binding);GO:0009039(urease activity);GO:0019627(urea metabolic process)	-	K01427	ko00230(Purine metabolism);ko00330(Arginine and proline metabolism);ko00791(Atrazine degradation)	471.14	428.98	331.2	537.88	511.09	534.7	3.32	3.36	2.92	4.68	5.21	4.73	410.44	527.89	3.2	4.87333	-0.606837	0.606837	0.00181869	0.0494009	no
comp4266_c0	comp4266_c0_seq1,comp4266_c0_seq2	2436	2179.71	Q9LUA9	-	GO:0005634(nucleus);GO:0005886(plasma membrane);GO:0005515(protein binding);GO:0008270(zinc ion binding)	-	-	-	4479.33	4655.34	3433.84	7679.01	6986.32	6958.96	48.03	56.26	47.2	98.9	108.8	92.84	4189.5	7208.1	50.4967	100.18	-0.988334	0.988334	0.00181078	0.0494009	no
comp4399_c1	comp4399_c1_seq1	253	253	Q940X7	RING-box protein 1	GO:0005737(cytoplasm);GO:0005634(nucleus);GO:0019005(SCF ubiquitin ligase complex);GO:0005515(protein binding);GO:0008270(zinc ion binding);GO:0016567(protein ubiquitination);GO:0009733(response to auxin stimulus)	[O] Posttranslational modification, protein turnover, chaperones	K03868	ko03420(Nucleotide excision repair);ko04110(Cell cycle);ko04111(Cell cycle - yeast);ko04114(Oocyte meiosis);ko04120(Ubiquitin mediated proteolysis);ko04310(Wnt signaling pathway);ko04350(TGF-beta signaling pathway);ko05200(Pathways in cancer);ko05211(Rena	368.1	328.02	329.91	143	143	163	45.88	46.24	52.49	22.24	26.36	25.67	342.01	149.667	48.2033	24.7567	0.961316	0.961316	0.00181921	0.0494009	no
comp20266_c0	comp20266_c0_seq1	3518	3518	Q9C5U0	-	GO:0016021(integral to membrane);GO:0005886(plasma membrane);GO:0005524(ATP binding);GO:0019955(cytokine binding);GO:0005034(osmosensor activity);GO:0004721(phosphoprotein phosphatase activity);GO:0043424(protein histidine kinase binding);GO:0009885(trans	[T] Signal transduction mechanisms	K00936	-	4389.48	3504.33	3315.46	4646.09	4260.16	4560.41	28.43	25.68	27.41	37.55	40.81	37.32	3736.42	4488.89	27.1733	38.56	-0.504914	0.504914	0.00181905	0.0494009	no
comp19328_c0	comp19328_c0_seq1	2375	2375	-	-	-	-	-	-	6466.64	5562.4	4744.25	2694.8	2517.8	3264.01	62.7	61	58.71	32.6	36.1	39.98	5591.1	2825.54	60.8033	36.2267	0.747098	0.747098	0.00181783	0.0494009	no
comp18391_c0	comp18391_c0_seq1	1265	1265	O49627	nitrogen fixation protein NifU and related proteins	-	[C] Energy production and conversion	K04488	-	5006.1	5149.69	4369.8	2192.2	1804.92	2485.37	93.77	109.11	104.48	51.24	50	58.82	4841.86	2160.83	102.453	53.3533	0.941317	0.941317	0.00181384	0.0494009	no
comp26223_c0	comp26223_c0_seq1	1147	1147	Q8VYI1	C4-hydroxylase	GO:0005783(endoplasmic reticulum);GO:0005794(Golgi apparatus);GO:0005506(iron ion binding);GO:0000170(sphingosine hydroxylase activity);GO:0006633(fatty acid biosynthetic process);GO:0009640(photomorphogenesis);GO:0046520(sphingoid biosynthetic process)	[I] Lipid transport and metabolism	K04713	ko00600(Sphingolipid metabolism)	744.01	731.56	646.19	351.03	331.95	431.42	15.47	17.2	17.15	9.11	10.21	11.33	707.253	371.467	16.6067	10.2167	0.700838	0.700838	0.00182489	0.0494793	no
comp13837_c0	comp13837_c0_seq1,comp13837_c0_seq2,comp13837_c0_seq3	2282	2191.69	Q7XJN0	-	GO:0005524(ATP binding);GO:0008026(ATP-dependent helicase activity);GO:0003723(RNA binding)	[A] RNA processing and modification	K01529	-	701.21	651.54	533.02	940.02	722	926	7.51	7.84	7.08	12.86	11.56	12.77	628.59	862.673	7.47667	12.3967	-0.729485	0.729485	0.00183431	0.0495976	no
comp10236_c0	comp10236_c0_seq1,comp10236_c0_seq2,comp10236_c0_seq3	1254	1033.65	-	-	-	-	-	-	270.24	224.45	260.09	298.01	294.98	370.93	6.13	5.75	7.63	11.24	12.42	12.83	251.593	321.307	6.50333	12.1633	-0.903287	0.903287	0.00184704	0.0496476	no
comp10126_c0	comp10126_c0_seq1,comp10126_c0_seq2,comp10126_c0_seq3	1093	826.23	-	-	-	-	-	-	217.85	206	171.26	164.66	139	123	7.15	7.53	7.51	5.35	5.71	5.04	198.37	142.22	7.39667	5.36667	0.462849	0.462849	0.00184744	0.0496476	no
comp2882_c0	comp2882_c0_seq1	1061	1061	P0C8K6	large subunit ribosomal protein L2	GO:0005739(mitochondrion);GO:0005840(ribosome);GO:0003735(structural constituent of ribosome);GO:0006412(translation)	[J] Translation, ribosomal structure and biogenesis	K02886	ko03010(Ribosome)	878.27	727.23	690.55	390	379.41	464.6	19.85	18.59	19.92	11	12.68	13.27	765.35	411.337	19.4533	12.3167	0.659406	0.659406	0.00185234	0.0496953	no
comp23713_c0	comp23713_c0_seq1	1556	1556	Q1PFH7	-	-	-	-	-	1027.09	944.08	875.28	495.2	507.26	535.17	15.46	16.07	16.82	9.3	11.29	10.18	948.817	512.543	16.1167	10.2567	0.651991	0.651991	0.00185747	0.0497496	no
comp3911_c0	comp3911_c0_seq1	1436	1436	Q94BT6	clock-associated PAS protein ZTL	GO:0005829(cytosol);GO:0005634(nucleus);GO:0019005(SCF ubiquitin ligase complex);GO:0009882(blue light photoreceptor activity);GO:0005515(protein binding);GO:0007623(circadian rhythm);GO:0043153(entrainment of circadian clock by photoperiod);GO:0009908(fl	-	K12115	ko04712(Circadian rhythm - plant)	879.85	665.13	696.82	1002.59	835	1064.81	14.41	12.32	14.57	20.49	20.23	22.04	747.267	967.467	13.7667	20.92	-0.603704	0.603704	0.00185622	0.0497496	no
comp2846_c0	comp2846_c0_seq1,comp2846_c0_seq2	2165	2109.56	Q9SFD5	transcriptional adapter 2-alpha	GO:0005634(nucleus);GO:0003677(DNA binding);GO:0008270(zinc ion binding);GO:0006355(regulation of transcription, DNA-dependent);GO:0009409(response to cold);GO:0006351(transcription, DNA-dependent)	[B] Chromatin structure and dynamics	K11314	-	589.72	529.02	453	761.26	597.21	743.97	6.51	6.61	6.37	10.41	9.69	10.29	523.913	700.813	6.49667	10.13	-0.640863	0.640863	0.00186049	0.0497747	no
comp5392_c1	comp5392_c1_seq1	355	355	Q7XQP4	-	GO:0005524(ATP binding);GO:0004674(protein serine/threonine kinase activity);GO:0009738(abscisic acid mediated signaling pathway)	[T] Signal transduction mechanisms	K00924	-	791.54	767.01	625.91	430.86	395.34	433.41	62.84	68.88	63.43	42.68	46.42	43.48	728.153	419.87	65.05	44.1933	0.55772	0.55772	0.0018734	0.0499254	no
comp22086_c0	comp22086_c0_seq1	2104	2104	-	-	-	[O] Posttranslational modification, protein turnover, chaperones	-	-	1789.69	1636.31	1378.33	1113.64	997.2	1191.95	19.67	20.34	19.34	15.27	16.21	16.55	1601.44	1100.93	19.7833	16.01	0.305312	0.305312	0.00187554	0.0499549	no
comp20973_c0	comp20973_c0_seq1	916	916	-	-	-	[K] Transcription	-	-	2164.23	1936.42	1917.61	915.13	989.56	933.65	57.34	58.03	64.85	30.25	38.78	31.26	2006.09	946.113	60.0733	33.43	0.845581	0.845581	0.00187865	0.0500071	no
comp382681_c0	comp382681_c0_seq1	1286	1286	O80624	-	GO:0005886(plasma membrane);GO:0009506(plasmodesma)	-	-	-	15.99	11	9	22	16	20.99	0.29	0.23	0.21	0.51	0.44	0.49	11.9967	19.6633	0.243333	0.48	-0.9801	0.9801	0.00188395	0.0500676	no
comp19266_c0	comp19266_c0_seq1	986	986	Q9CAB6	ubiquitin-conjugating enzyme E2 variant	GO:0031372(UBC13-MMS2 complex);GO:0016881(acid-amino acid ligase activity);GO:0005515(protein binding);GO:0006301(postreplication repair)	[O] Posttranslational modification, protein turnover, chaperones	K10704	-	4212.85	3749.97	3470.69	2268.99	1586.1	2042.74	103.05	103.76	108.37	69.26	57.38	63.14	3811.17	1965.94	105.06	63.26	0.731848	0.731848	0.00190553	0.0503899	no
comp9177_c0	comp9177_c0_seq1,comp9177_c0_seq2	4031	3490.48	Q9FPR3	sterile alpha motif and leucine zipper containing kinase AZK	-	[T] Signal transduction mechanisms	K04424	ko04010(MAPK signaling pathway);ko04530(Tight junction)	1677.52	1468.77	1580.43	2192.09	2102.86	2407.27	11.07	10.94	13.21	17.76	19.99	19.76	1575.57	2234.07	11.74	19.17	-0.707418	0.707418	0.00190761	0.0504172	no
comp13465_c0	comp13465_c0_seq1,comp13465_c0_seq2,comp13465_c0_seq3,comp13465_c0_seq4,comp13465_c0_seq5,comp13465_c0_seq6,comp13465_c0_seq7,comp13465_c0_seq8	3445	2425.37	Q2V9B0	-	GO:0005829(cytosol);GO:0005634(nucleus);GO:0003677(DNA binding);GO:0006355(regulation of transcription, DNA-dependent);GO:0006950(response to stress);GO:0006351(transcription, DNA-dependent)	-	-	-	3329.48	3603.42	2274.69	6157.17	5029.78	5206.71	32.76	39.22	28.82	66.73	64.29	58.7	3069.2	5464.55	33.6	63.24	-0.912376	0.912376	0.00191584	0.0505081	no
comp9345_c0	comp9345_c0_seq1,comp9345_c0_seq2	2255	2211.57	-	nucleolin	-	[K] Transcription	K11294	ko05130(Pathogenic Escherichia coli infection)	732.43	742.13	559.99	974.81	805.51	996.21	7.67	8.77	7.47	12.69	12.43	13.13	678.183	925.51	7.97	12.75	-0.677846	0.677846	0.00192824	0.0506252	no
comp5184_c0	comp5184_c0_seq1	2347	2347	Q92994	-	GO:0000126(transcription factor TFIIIB complex);GO:0003743(translation initiation factor activity);GO:0008270(zinc ion binding);GO:0045893(positive regulation of transcription, DNA-dependent);GO:0009303(rRNA transcription);GO:0006384(transcription initiat	[K] Transcription	-	-	1351.09	1067	897.98	1595.84	1341.58	1500.8	13.26	11.85	11.25	19.54	19.47	18.61	1105.36	1479.41	12.12	19.2067	-0.664217	0.664217	0.001922	0.0506252	no
comp21709_c0	comp21709_c0_seq1	2999	2999	Q9LXX6	-	GO:0005829(cytosol);GO:0000145(exocyst);GO:0009846(pollen germination);GO:0009860(pollen tube growth);GO:0015031(protein transport);GO:0006904(vesicle docking involved in exocytosis)	[U] Intracellular trafficking, secretion, and vesicular transport	-	-	1873.62	1516.84	1338.37	1975.12	1760.53	2176.2	14.29	13.09	13.03	18.8	19.86	20.97	1576.28	1970.62	13.47	19.8767	-0.561326	0.561326	0.00193065	0.0506252	no
comp15241_c1	comp15241_c1_seq1,comp15241_c1_seq2,comp15241_c1_seq3,comp15241_c1_seq4,comp15241_c1_seq5,comp15241_c1_seq6,comp15241_c1_seq7,comp15241_c1_seq8,comp15241_c1_seq9	3619	2449.88	Q94KL5	-	GO:0005634(nucleus);GO:0043565(sequence-specific DNA binding);GO:0003700(sequence-specific DNA binding transcription factor activity);GO:0009965(leaf morphogenesis)	[K] Transcription	-	-	2571.89	2229.88	2687.33	3903.67	3489.09	3949	26.3	25.54	33.76	51.15	58.08	53.13	2496.37	3780.59	28.5333	54.12	-0.923514	0.923514	0.00192937	0.0506252	no
comp18184_c0	comp18184_c0_seq1	1821	1821	O22769	NADH dehydrogenase (ubiquinone) flavoprotein 2	GO:0005747(mitochondrial respiratory chain complex I);GO:0051537(2 iron, 2 sulfur cluster binding);GO:0051287(NAD binding);GO:0008137(NADH dehydrogenase (ubiquinone) activity);GO:0008270(zinc ion binding);GO:0022900(electron transport chain);GO:0006979(re	[C] Energy production and conversion	K03943	ko00190(Oxidative phosphorylation);ko05010(Alzheimer's disease);ko05012(Parkinson's disease);ko05016(Huntington's disease)	8148.82	7744.92	6603.05	2863.29	2967.5	3776.43	104.06	111.87	107.63	45.62	56.05	60.93	7498.93	3202.41	107.853	54.2	0.992706	0.992706	0.00194297	0.0506821	no
comp5203_c0	comp5203_c0_seq1,comp5203_c0_seq2	3163	2907.77	-	-	-	[I] Lipid transport and metabolism	-	-	1915.27	1574.15	1392.39	835.47	665.04	986	15.92	14.53	14.77	7.93	7.25	9.5	1627.27	828.837	15.0733	8.22667	0.873619	0.873619	0.00194656	0.0506928	no
comp29500_c0	comp29500_c0_seq1	1193	1193	-	-	-	-	-	-	381	331.19	312.1	172.98	164.68	205.7	7.6	7.47	7.94	4.3	4.86	5.18	341.43	181.12	7.67	4.78	0.682216	0.682216	0.00194766	0.050694	no
comp12913_c1	comp12913_c1_seq1	1173	1173	O24296	glutathione peroxidase	GO:0009570(chloroplast stroma);GO:0004602(glutathione peroxidase activity);GO:0047066(phospholipid-hydroperoxide glutathione peroxidase activity);GO:0006979(response to oxidative stress)	[O] Posttranslational modification, protein turnover, chaperones	K00432	ko00480(Glutathione metabolism);ko00590(Arachidonic acid metabolism)	2261.56	2048.96	1606.81	789.99	884.72	1020	45.91	47.05	41.63	20.01	26.56	26.16	1972.44	898.237	44.8633	24.2433	0.887949	0.887949	0.00195645	0.050747	no
comp19651_c0	comp19651_c0_seq1	1034	1034	Q941D3	-	GO:0009941(chloroplast envelope);GO:0005198(structural molecule activity)	-	-	-	1130.88	1084.59	893.68	439.55	461.48	560.96	26.28	28.51	26.51	12.75	15.86	16.47	1036.38	487.33	27.1	15.0267	0.850768	0.850768	0.00195932	0.050747	no
comp9895_c1	comp9895_c1_seq1,comp9895_c1_seq2	1354	1322.51	-	-	-	-	-	-	645.28	597	423.23	802	718.22	752.85	11.66	12.18	9.84	18.18	19.04	17.12	555.17	757.69	11.2267	18.1133	-0.690122	0.690122	0.00196679	0.050747	no
comp18649_c0	comp18649_c0_seq1	1024	1024	Q8LBK6	monothiol glutaredoxin	GO:0005739(mitochondrion);GO:0051537(2 iron, 2 sulfur cluster binding);GO:0009055(electron carrier activity);GO:0046872(metal ion binding);GO:0015035(protein disulfide oxidoreductase activity);GO:0045454(cell redox homeostasis)	[O] Posttranslational modification, protein turnover, chaperones	K07390	-	3719.45	2954.28	2937.11	1681.61	1572.27	1990.01	87.35	78.47	88.04	49.28	54.61	59.05	3203.61	1747.96	84.62	54.3133	0.639692	0.639692	0.00197728	0.0507495	no
comp17603_c0	comp17603_c0_seq1	811	811	-	F-type H+-transporting ATPase subunit g	-	-	K02140	ko00190(Oxidative phosphorylation)	11957.2	9382.2	9699.71	4526.28	4670.52	5157.95	361.95	321.24	374.78	170.96	209.1	197.27	10346.4	4784.92	352.657	192.443	0.873831	0.873831	0.0019724	0.0507495	no
comp10846_c0	comp10846_c0_seq1,comp10846_c0_seq2,comp10846_c0_seq3	1183	948.22	Q5JME8	-	-	-	-	-	578.86	578.73	517.02	237	260.98	263	14.19	16.54	16.38	6.81	9.39	8	558.203	253.66	15.7033	8.06667	0.961026	0.961026	0.00199247	0.0508943	no
comp3727_c0	comp3727_c0_seq1,comp3727_c0_seq2	1765	1444.97	O80594	-	GO:0005789(endoplasmic reticulum membrane);GO:0016021(integral to membrane);GO:0016126(sterol biosynthetic process)	[S] Function unknown	-	-	1882.58	1497.62	1330.83	879.05	741.65	1002.79	31.72	29.35	29.48	20.27	18.46	22	1570.34	874.497	30.1833	20.2433	0.576305	0.576305	0.00198905	0.0508943	no
comp13467_c0	comp13467_c0_seq1,comp13467_c0_seq2,comp13467_c0_seq3,comp13467_c0_seq4,comp13467_c0_seq5	1514	1341.79	-	-	-	[S] Function unknown	-	-	2405.68	2257.96	1795.06	2719.45	2105.4	2542.93	42.08	44.56	39.38	60.94	55.32	57.73	2152.9	2455.93	42.0067	57.9967	-0.465352	0.465352	0.00199195	0.0508943	no
comp21457_c0	comp21457_c0_seq1	940	940	Q10121	TdcF protein	-	[J] Translation, ribosomal structure and biogenesis	K07567	-	1754.89	1845.13	1487.2	864.64	526.52	805.01	45.21	53.76	48.9	27.79	20.06	26.2	1695.74	732.057	49.29	24.6833	0.997758	0.997758	0.00199189	0.0508943	no
comp10095_c0	comp10095_c0_seq1,comp10095_c0_seq2	1469	1303.7	-	-	-	[R] General function prediction only	-	-	359.99	300.88	244	435.28	420.06	448.43	6.77	6.25	5.78	9.76	11.22	10.44	301.623	434.59	6.26667	10.4733	-0.740951	0.740951	0.00200855	0.0511418	no
comp9419_c0	comp9419_c0_seq1,comp9419_c0_seq2,comp9419_c0_seq3	1172	1004.11	-	ATP-dependent Clp protease adaptor protein ClpS	-	-	K06891	-	730	679.23	554.06	430.03	372.57	406.97	17.65	18.4	16.97	12.6	12.97	12.3	654.43	403.19	17.6733	12.6233	0.485481	0.485481	0.0020179	0.0511899	no
comp20233_c0	comp20233_c0_seq1	650	650	-	-	-	-	-	-	1675.47	1335.38	1248	740.48	592.74	738.54	64.89	58.5	61.7	35.79	33.95	36.14	1419.62	690.587	61.6967	35.2933	0.805797	0.805797	0.0020241	0.0512887	no
comp11210_c0	comp11210_c0_seq1,comp11210_c0_seq2,comp11210_c0_seq3,comp11210_c0_seq4,comp11210_c0_seq5,comp11210_c0_seq6	2819	2293.15	A2X2K3	protein phosphatase 2 (formerly 2A), regulatory subunit B	GO:0000159(protein phosphatase type 2A complex);GO:0008601(protein phosphatase type 2A regulator activity);GO:0007165(signal transduction)	[T] Signal transduction mechanisms	K04354	ko04111(Cell cycle - yeast);ko04530(Tight junction);ko05142(Chagas disease)	1336.87	1280.91	1274.42	2271.41	2241.55	2274.77	13.69	14.53	16.69	27.73	32.29	28.44	1297.4	2262.58	14.97	29.4867	-0.977989	0.977989	0.002025	0.0512887	no
comp9804_c0	comp9804_c0_seq1,comp9804_c0_seq2	3908	3857.2	Q6A332	-	GO:0005634(nucleus);GO:0003677(DNA binding);GO:0005515(protein binding);GO:0006355(regulation of transcription, DNA-dependent)	[B] Chromatin structure and dynamics ;[D] Cell cycle control, cell division, chromosome partitioning ;[T] Signal transduction mechanisms	-	-	1256.3	1285.25	1152.95	1895.94	1849.57	2071.27	7.43	8.59	8.72	13.92	16.18	15.5	1231.5	1938.93	8.24667	15.2	-0.882188	0.882188	0.00202877	0.051357	no
comp13543_c0	comp13543_c0_seq1,comp13543_c0_seq2,comp13543_c0_seq3,comp13543_c0_seq4,comp13543_c0_seq5	1857	1651.2	-	-	-	-	-	-	602	636	503.42	806.99	636.85	797.86	8.09	9.89	8.83	15.38	13.44	14.47	580.473	747.233	8.93667	14.43	-0.691263	0.691263	0.00204039	0.0515038	no
comp17335_c0	comp17335_c0_seq1	2441	2441	P93207	tyrosine 3-monooxygenase/tryptophan 5-monooxygenase activation protein	GO:0019904(protein domain specific binding)	[O] Posttranslational modification, protein turnover, chaperones	K06630	ko04110(Cell cycle);ko04114(Oocyte meiosis);ko04722(Neurotrophin signaling pathway)	22894.3	20493.7	17656.6	9047.37	8652.72	10639.3	215.78	218.48	212.42	106.4	120.62	126.7	20348.2	9446.46	215.56	117.907	0.870444	0.870444	0.00204993	0.0516177	no
comp23829_c0	comp23829_c0_seq1	988	988	-	-	-	-	-	-	1228.19	985.35	1025.88	434.98	486.19	552	29.98	27.2	31.96	13.25	17.55	17.02	1079.81	491.057	29.7133	15.94	0.898459	0.898459	0.00205582	0.0516331	no
comp17548_c0	comp17548_c0_seq1	1719	1719	-	-	-	[S] Function unknown	-	-	16407.2	12837	12862.5	8315.68	5567.42	7672.46	222.51	196.92	222.66	140.72	111.67	131.47	14035.5	7185.19	214.03	127.953	0.742195	0.742195	0.0020687	0.0516437	no
comp6314_c0	comp6314_c0_seq1,comp6314_c0_seq2	1252	1051.15	Q9ZT46	-	GO:0003723(RNA binding);GO:0006810(transport)	[R] General function prediction only	-	-	2355.75	2029.23	2040.01	1058.8	1097.47	1024.97	54.66	53.33	60.61	29.78	36.93	29.03	2141.66	1060.41	56.2	31.9133	0.816411	0.816411	0.00206707	0.0516437	no
comp20185_c0	comp20185_c0_seq1	3637	3637	Q9M2E8	homeobox-leucine zipper protein	GO:0005634(nucleus);GO:0043565(sequence-specific DNA binding);GO:0003700(sequence-specific DNA binding transcription factor activity)	-	K09338	-	2399.44	1635.37	1588.67	3178.58	2699.78	2943.66	15.02	11.58	12.7	24.83	25	23.29	1874.49	2940.67	13.1	24.3733	-0.895737	0.895737	0.00206054	0.0516437	no
comp12261_c1	comp12261_c1_seq1	242	242	P48482	protein phosphatase	GO:0046872(metal ion binding);GO:0004722(protein serine/threonine phosphatase activity);GO:0006470(protein dephosphorylation)	[T] Signal transduction mechanisms ;[R] General function prediction only	K01090	-	153.06	144.07	116.06	77	52	58	20.33	21.64	19.67	12.76	10.21	9.73	137.73	62.3333	20.5467	10.9	0.914576	0.914576	0.00209376	0.0516933	no
comp11828_c0	comp11828_c0_seq1,comp11828_c0_seq2	3611	3586.02	A6W7R2	D-alanine-D-alanine ligase	GO:0005618(cell wall);GO:0005737(cytoplasm);GO:0005524(ATP binding);GO:0008716(D-alanine-D-alanine ligase activity);GO:0046872(metal ion binding);GO:0007047(cellular cell wall organization);GO:0009252(peptidoglycan biosynthetic process);GO:0008360(regulat	-	K01921	ko00473(D-Alanine metabolism);ko00550(Peptidoglycan biosynthesis)	435.02	391.02	342.6	592.96	495	552.52	2.75	2.8	2.77	4.68	4.67	4.4	389.547	546.827	2.77333	4.58333	-0.724776	0.724776	0.00208022	0.0516933	no
comp16853_c0	comp16853_c0_seq1,comp16853_c0_seq10,comp16853_c0_seq11,comp16853_c0_seq12,comp16853_c0_seq2,comp16853_c0_seq3,comp16853_c0_seq4,comp16853_c0_seq5,comp16853_c0_seq6,comp16853_c0_seq7,comp16853_c0_seq8,comp16853_c0_seq9	3265	2985.39	Q551H4	non-specific serine/threonine protein kinase	GO:0005524(ATP binding);GO:0046872(metal ion binding);GO:0004674(protein serine/threonine kinase activity)	[T] Signal transduction mechanisms	K08282	-	5147.87	4802.25	3937.69	5277.96	4702.28	5126.37	39.56	41.72	38.66	50.36	53.3	49.46	4629.27	5035.54	39.98	51.04	-0.35235	0.35235	0.00209446	0.0516933	no
comp9957_c1	comp9957_c1_seq1	1319	1319	Q948U0	-	GO:0016021(integral to membrane);GO:0005886(plasma membrane);GO:0005509(calcium ion binding);GO:0009055(electron carrier activity);GO:0050660(flavin adenine dinucleotide binding);GO:0005506(iron ion binding);GO:0050664(oxidoreductase activity, acting on N	[P] Inorganic ion transport and metabolism ;[Q] Secondary metabolites biosynthesis, transport and catabolism	-	-	110	92	62.96	148	133.91	135	1.97	1.86	1.44	3.31	3.55	3.06	88.32	138.97	1.75667	3.30667	-0.912537	0.912537	0.00208403	0.0516933	no
comp17481_c0	comp17481_c0_seq1	1763	1763	O22932	-	GO:0005524(ATP binding);GO:0005515(protein binding);GO:0004674(protein serine/threonine kinase activity);GO:0009268(response to pH);GO:0007165(signal transduction)	[T] Signal transduction mechanisms	K00924	-	29662.6	24023.9	21423.8	13206.5	13546.1	13909.1	391.8	358.92	361.21	217.66	264.63	232.13	25036.8	13553.9	370.643	238.14	0.638222	0.638222	0.00211363	0.051917	no
comp15997_c0	comp15997_c0_seq1,comp15997_c0_seq10,comp15997_c0_seq11,comp15997_c0_seq12,comp15997_c0_seq13,comp15997_c0_seq2,comp15997_c0_seq3,comp15997_c0_seq4,comp15997_c0_seq5,comp15997_c0_seq6,comp15997_c0_seq7,comp15997_c0_seq8,comp15997_c0_seq9	2194	1951.44	Q9LT23	-	GO:0005634(nucleus);GO:0003677(DNA binding);GO:0006355(regulation of transcription, DNA-dependent);GO:0006351(transcription, DNA-dependent)	-	-	-	629.99	611.22	376.31	949.11	734.01	1000.86	7.43	8.04	5.84	13.85	12.63	15.01	539.173	894.66	7.10333	13.83	-0.961233	0.961233	0.00211561	0.051939	no
comp12265_c0	comp12265_c0_seq1,comp12265_c0_seq2,comp12265_c0_seq3	4559	3920.08	Q9LDK9	AP-4 complex subunit beta-1	GO:0030131(clathrin adaptor complex);GO:0030665(clathrin coated vesicle membrane);GO:0005794(Golgi apparatus);GO:0043424(protein histidine kinase binding);GO:0008565(protein transporter activity);GO:0006897(endocytosis);GO:0006886(intracellular protein tr	[U] Intracellular trafficking, secretion, and vesicular transport	K12401	ko04142(Lysosome)	2321.22	1779.77	1981.06	2830.88	2341.98	2717.82	14.09	11.8	14.61	23.23	21.88	21.41	2027.35	2630.23	13.5	22.1733	-0.715866	0.715866	0.00215269	0.0520871	no
comp6253_c0	comp6253_c0_seq1,comp6253_c0_seq2	3599	2914.11	Q9LUN2	-	GO:0016021(integral to membrane);GO:0005886(plasma membrane);GO:0055085(transmembrane transport)	-	-	-	1746.49	1595.64	1098.11	2335.86	2005.4	2464.7	14.05	14.44	11.43	21.74	22.85	23.81	1480.08	2268.65	13.3067	22.8	-0.776885	0.776885	0.00215054	0.0520871	no
comp34996_c0	comp34996_c0_seq1	2301	2301	Q9ZRV4	DNA mismatch repair protein MLH1	-	[L] Replication, recombination and repair	K08734	ko03430(Mismatch repair);ko05200(Pathways in cancer);ko05210(Colorectal cancer);ko05213(Endometrial cancer)	410.43	421	277	653.16	539.7	591	4.11	4.77	3.54	8.16	8	7.48	369.477	594.62	4.14	7.88	-0.928565	0.928565	0.00214586	0.0520871	no
comp5626_c0	comp5626_c0_seq1,comp5626_c0_seq2	1888	1864.11	P09887	-	GO:0009507(chloroplast);GO:0006950(response to stress)	[O] Posttranslational modification, protein turnover, chaperones	-	-	84	68	67	121	96.13	127	1.07	0.96	1.06	1.87	1.75	2	73	114.71	1.03	1.87333	-0.862963	0.862963	0.00214598	0.0520871	no
comp28055_c0	comp28055_c0_seq1	364	364	-	-	-	-	-	-	171.04	133	106.67	195.96	191	222	13.16	11.57	10.47	18.81	21.73	21.58	136.903	202.987	11.7333	20.7067	-0.819482	0.819482	0.00215424	0.0520871	no
comp9624_c0	comp9624_c0_seq1,comp9624_c0_seq2	3441	3229.76	-	-	-	[U] Intracellular trafficking, secretion, and vesicular transport	-	-	1357.27	1376.97	1012.05	1696.99	1659.16	1761.14	9.65	10.91	9.28	15.58	17.94	16.37	1248.76	1705.76	9.94667	16.63	-0.741503	0.741503	0.00214517	0.0520871	no
comp8124_c0	comp8124_c0_seq1,comp8124_c0_seq2	2884	2786.64	A7SBN6	-	GO:0005634(nucleus);GO:0003677(DNA binding);GO:0008270(zinc ion binding);GO:0006355(regulation of transcription, DNA-dependent);GO:0006351(transcription, DNA-dependent)	[A] RNA processing and modification	-	-	2365.42	1915.91	1651.74	2896.87	2169.86	2634.55	19.48	17.72	17.28	29.55	26.23	27.29	1977.69	2567.09	18.16	27.69	-0.608601	0.608601	0.00214872	0.0520871	no
comp9932_c0	comp9932_c0_seq1,comp9932_c0_seq2	2019	1942.05	Q9FNZ2	F-box and WD-40 domain protein CDC4	GO:0003677(DNA binding);GO:0008270(zinc ion binding)	[R] General function prediction only	K03361	ko04111(Cell cycle - yeast);ko04120(Ubiquitin mediated proteolysis)	1567.86	1311.81	1210.03	1658.23	1364.49	1733.97	18.04	17.05	18.06	23.73	23.32	25.28	1363.23	1585.56	17.7167	24.11	-0.444524	0.444524	0.00215366	0.0520871	no
comp10462_c0	comp10462_c0_seq1,comp10462_c0_seq2,comp10462_c0_seq3,comp10462_c0_seq4	2462	2251.61	Q9LSM5	-	-	[K] Transcription	-	-	571.14	541.82	411	748.34	642.57	664	5.85	6.21	5.38	9.39	9.66	8.51	507.987	684.97	5.81333	9.18667	-0.660176	0.660176	0.00214313	0.0520871	no
comp25503_c0	comp25503_c0_seq1	987	987	Q9SJ81	-	GO:0046658(anchored to plasma membrane)	-	-	-	1129.99	1125.68	923.64	464.14	402.11	601	27.61	31.11	28.81	14.15	14.53	18.55	1059.77	489.083	29.1767	15.7433	0.890074	0.890074	0.00217179	0.0521292	no
comp11036_c0	comp11036_c0_seq1,comp11036_c0_seq2,comp11036_c0_seq3	2499	2125.39	-	-	-	-	-	-	3649.24	3095.18	2622.29	3867.21	3262.31	3493.42	41.56	39.49	37.73	51.25	52.1	48.43	3122.24	3540.98	39.5933	50.5933	-0.35369	0.35369	0.00216876	0.0521292	no
comp21078_c0	comp21078_c0_seq1	3039	3039	O48809	phospholipase D	GO:0005576(extracellular region);GO:0009505(plant-type cell wall);GO:0007047(cellular cell wall organization);GO:0007275(multicellular organismal development)	[K] Transcription	K01115	ko00564(Glycerophospholipid metabolism);ko00565(Ether lipid metabolism);ko04144(Endocytosis);ko04666(Fc gamma R-mediated phagocytosis);ko04912(GnRH signaling pathway)	1451.12	1066.99	1232.26	2241.21	1813.99	2244.29	10.92	9.08	11.83	21.04	20.19	21.34	1250.12	2099.83	10.61	20.8567	-0.975084	0.975084	0.00218255	0.0522984	no
comp16348_c0	comp16348_c0_seq1,comp16348_c0_seq2,comp16348_c0_seq3	1944	1869.7	Q9SJL6	golgi SNAP receptor complex member 2	GO:0000139(Golgi membrane);GO:0016021(integral to membrane);GO:0015031(protein transport)	[U] Intracellular trafficking, secretion, and vesicular transport	K08496	ko04130(SNARE interactions in vesicular transport)	774.61	717.97	510.01	921.42	865.41	960.62	9.58	10.08	8.08	14.27	15.75	15	667.53	915.817	9.24667	15.0067	-0.698598	0.698598	0.00218575	0.0523228	no
comp3487_c0	comp3487_c0_seq1	2778	2778	Q9FFT9	-	GO:0005730(nucleolus);GO:0005524(ATP binding);GO:0008026(ATP-dependent helicase activity);GO:0003723(RNA binding)	[A] RNA processing and modification	K01529	-	346	328.98	360.33	554.22	512.97	598.16	2.85	3.07	3.79	5.71	6.26	6.24	345.103	555.117	3.23667	6.07	-0.907188	0.907188	0.00218769	0.0523432	no
comp9559_c0	comp9559_c0_seq1,comp9559_c0_seq2	2186	1733.57	P33303	-	GO:0016021(integral to membrane);GO:0005743(mitochondrial inner membrane);GO:0005488(binding);GO:0005469(succinate:fumarate antiporter activity)	[C] Energy production and conversion	-	-	555.26	588.85	518.98	872.94	752.57	921.42	7.45	9.03	8.97	13.36	13.96	14.38	554.363	848.977	8.48333	13.9	-0.712382	0.712382	0.00220788	0.05244	no
comp20547_c0	comp20547_c0_seq1	2081	2081	-	-	-	[K] Transcription	-	-	2540.84	2005.19	1936.19	2573.97	2245.39	2662.75	28.24	25.21	27.47	35.7	36.91	37.4	2160.74	2494.04	26.9733	36.67	-0.443066	0.443066	0.00220326	0.05244	no
comp15448_c0	comp15448_c0_seq1,comp15448_c0_seq2,comp15448_c0_seq3,comp15448_c0_seq4	2658	2519.46	Q9XIC7	-	GO:0016021(integral to membrane);GO:0005886(plasma membrane);GO:0005524(ATP binding);GO:0008289(lipid binding);GO:0004674(protein serine/threonine kinase activity);GO:0004872(receptor activity);GO:0033612(receptor serine/threonine kinase binding);GO:00095	-	K00924	-	2243.47	1668.03	1888.97	2979.51	2962.75	3459.9	20.29	17.11	21.91	33.92	39.66	39.58	1933.49	3134.05	19.77	37.72	-0.932017	0.932017	0.0022238	0.0526194	no
comp14858_c0	comp14858_c0_seq1,comp14858_c0_seq2	2489	2392.38	Q5C9Z4	-	GO:0005730(nucleolus);GO:0005515(protein binding);GO:0016070(RNA metabolic process)	[T] Signal transduction mechanisms	-	-	456.06	467.11	426.01	691.04	634.33	633.33	4.41	5.09	5.26	8.33	8.99	7.74	449.727	652.9	4.92	8.35333	-0.763694	0.763694	0.00222356	0.0526194	no
comp10640_c0	comp10640_c0_seq1,comp10640_c0_seq2,comp10640_c0_seq3	2173	1959.11	-	-	-	[K] Transcription ;[R] General function prediction only	-	-	498.02	381.63	413.18	750.24	638.99	722.93	5.91	5.21	6.28	10.91	11.1	10.82	430.943	704.053	5.8	10.9433	-0.915927	0.915927	0.00223324	0.0527133	no
comp4009_c0	comp4009_c0_seq1,comp4009_c0_seq2	3173	3115.32	Q08C72	U1 small nuclear ribonucleoprotein 70kDa	GO:0005681(spliceosomal complex);GO:0003723(RNA binding);GO:0006397(mRNA processing);GO:0008380(RNA splicing)	[R] General function prediction only	K11093	ko03040(Spliceosome)	2542.96	1858.39	1919.43	3260.62	2611.68	2790.19	18.64	15.44	17.99	29.77	28.29	25.89	2106.93	2887.5	17.3567	27.9833	-0.689078	0.689078	0.00223277	0.0527133	no
comp15375_c0	comp15375_c0_seq1,comp15375_c0_seq2,comp15375_c0_seq3,comp15375_c0_seq4	1302	1284.67	Q6DRC4	translation initiation factor eIF-3 subunit 4	GO:0005852(eukaryotic translation initiation factor 3 complex);GO:0000166(nucleotide binding);GO:0003743(translation initiation factor activity)	[J] Translation, ribosomal structure and biogenesis	K03248	-	7871.29	7236.82	6525.75	4213.27	4102.01	4540.4	145.02	150.82	153.46	96.85	111.78	105.7	7211.29	4285.23	149.767	104.777	0.515399	0.515399	0.00225636	0.0530084	no
comp17265_c0	comp17265_c0_seq1	1104	1104	-	-	-	-	-	-	33363.8	30318.8	30070.7	17780.8	12585.5	16235.4	722.64	742.79	831.38	480.55	403.16	444.3	31251.1	15533.9	765.603	442.67	0.790366	0.790366	0.00226311	0.0530761	no
comp8153_c0	comp8153_c0_seq1,comp8153_c0_seq2	1524	1517.42	Q13435	DNA topoisomerase I	GO:0071013(catalytic step 2 spliceosome);GO:0005654(nucleoplasm);GO:0005689(U12-type spliceosomal complex);GO:0003676(nucleic acid binding);GO:0044419(interspecies interaction between organisms);GO:0000398(nuclear mRNA splicing, via spliceosome)	[A] RNA processing and modification	K03163	-	2135.05	1521.25	1733.88	3097.06	2522.48	2850.31	32.97	26.59	34.15	59.65	57.6	55.56	1796.73	2823.28	31.2367	57.6033	-0.882912	0.882912	0.00226289	0.0530761	no
comp16423_c0	comp16423_c0_seq1	1796	1796	Q9FJV0	mitogen-activated protein kinase kinase 1	GO:0005524(ATP binding);GO:0004708(MAP kinase kinase activity);GO:0005515(protein binding);GO:0004674(protein serine/threonine kinase activity)	[T] Signal transduction mechanisms	K04368	ko04010(MAPK signaling pathway);ko04012(ErbB signaling pathway);ko04013(MAPK signaling pathway - fly);ko04062(Chemokine signaling pathway);ko04114(Oocyte meiosis);ko04270(Vascular smooth muscle contraction);ko04320(Dorso-ventral axis formation);ko04370(VE	622.1	484.94	527	819.97	814.55	886.94	8.06	7.11	8.72	13.26	15.61	14.52	544.68	840.487	7.96333	14.4633	-0.860956	0.860956	0.00226737	0.0530841	no
comp10686_c0	comp10686_c0_seq1,comp10686_c0_seq2,comp10686_c0_seq3,comp10686_c0_seq4	1926	1581.61	-	-	-	[R] General function prediction only	K06883	-	212.73	174	205.02	361	260.22	344.96	3.11	2.83	3.74	6.61	5.55	6.16	197.25	322.06	3.22667	6.10667	-0.920341	0.920341	0.00227248	0.0530841	no
comp22980_c0	comp22980_c0_seq1	2770	2770	Q8RXE7	stromal membrane-associated protein	GO:0005886(plasma membrane);GO:0008060(ARF GTPase activator activity);GO:0004674(protein serine/threonine kinase activity);GO:0008270(zinc ion binding);GO:0046777(protein autophosphorylation);GO:0032312(regulation of ARF GTPase activity)	[T] Signal transduction mechanisms	K12486	ko04144(Endocytosis)	1567.45	1018.14	1176.88	2212.72	1636.79	2093.99	12.97	9.53	12.43	22.85	20.03	21.89	1254.16	1981.17	11.6433	21.59	-0.890859	0.890859	0.00228952	0.0530863	no
comp20324_c0	comp20324_c0_seq1	1213	1213	-	sterol carrier protein 2	-	[I] Lipid transport and metabolism	K08764	ko00120(Primary bile acid biosynthesis);ko03320(PPAR signaling pathway);ko04146(Peroxisome)	1465.97	1341	1298.14	536.23	546.24	745.69	28.71	29.71	32.46	13.11	15.82	18.45	1368.37	609.387	30.2933	15.7933	0.939685	0.939685	0.00228954	0.0530863	no
comp17182_c0	comp17182_c0_seq1	1818	1818	Q38827	-	GO:0005634(nucleus);GO:0046983(protein dimerization activity);GO:0009734(auxin mediated signaling pathway);GO:0006355(regulation of transcription, DNA-dependent);GO:0006351(transcription, DNA-dependent)	-	-	-	45387.2	43592.3	35856.8	21102.7	20974.5	25463.9	580.59	630.74	585.48	336.84	396.82	411.56	41612.1	22513.7	598.937	381.74	0.649813	0.649813	0.00228701	0.0530863	no
comp12897_c0	comp12897_c0_seq1,comp12897_c0_seq2,comp12897_c0_seq3,comp12897_c0_seq4,comp12897_c0_seq5	2644	2042.8	Q68FT3	beta-carotene ketolase (CrtO type)	GO:0016491(oxidoreductase activity)	[H] Coenzyme transport and metabolism	K02292	ko00906(Carotenoid biosynthesis)	2049.76	1911.96	1639.46	1565.3	1224.18	1393.15	24.92	26.17	25.36	21.94	20.68	20.36	1867.06	1394.21	25.4833	20.9933	0.279623	0.279623	0.00231084	0.0532714	no
comp13338_c0	comp13338_c0_seq1,comp13338_c0_seq2,comp13338_c0_seq3	990	755.7	-	-	-	-	-	-	168.41	219.99	150.93	353.01	258.34	283.08	7.08	7.24	7.14	13.75	12.94	12.71	179.777	298.143	7.15333	13.1333	-0.876546	0.876546	0.0023208	0.0532962	no
comp28682_c0	comp28682_c0_seq1	2949	2949	Q9SIT7	-	GO:0005488(binding)	[R] General function prediction only	-	-	390.93	272.63	258	455	448.25	467	3.03	2.39	2.56	4.41	5.14	4.58	307.187	456.75	2.66	4.71	-0.824301	0.824301	0.00233236	0.053311	no
comp23870_c0	comp23870_c0_seq1	1296	1296	A7GT07	molecular chaperone DnaJ	GO:0005737(cytoplasm);GO:0005524(ATP binding);GO:0031072(heat shock protein binding);GO:0046872(metal ion binding);GO:0051082(unfolded protein binding);GO:0006260(DNA replication);GO:0006457(protein folding);GO:0009408(response to heat)	[O] Posttranslational modification, protein turnover, chaperones	K03686	-	631.88	626.17	537.52	334.91	275	304	11.54	12.93	12.53	7.63	7.43	7.01	598.523	304.637	12.3333	7.35667	0.745439	0.745439	0.00233922	0.053311	no
comp15400_c0	comp15400_c0_seq1,comp15400_c0_seq2,comp15400_c0_seq3,comp15400_c0_seq4,comp15400_c0_seq5,comp15400_c0_seq6	2390	2276.01	-	-	-	-	-	-	1629.21	1361.31	1257.9	2110.47	1950.18	2081.85	16.82	15.74	16.4	26.96	29.6	27.12	1416.14	2047.5	16.32	27.8933	-0.773279	0.773279	0.00232887	0.053311	no
comp17787_c0	comp17787_c0_seq1	1068	1068	-	-	-	-	-	-	6807.85	6097.5	6053.52	3115.17	2802.06	3544.47	152.79	154.79	173.42	87.24	93.01	100.51	6319.62	3153.9	160.333	93.5867	0.776699	0.776699	0.00234392	0.0533929	no
comp25529_c0	comp25529_c0_seq1	1760	1760	O80905	-	-	[P] Inorganic ion transport and metabolism	-	-	1519.63	1564.07	1335.06	731.25	610.95	624	20.11	23.41	22.55	12.07	11.96	10.43	1472.92	655.4	22.0233	11.4867	0.939073	0.939073	0.00235327	0.0535043	no
comp9654_c0	comp9654_c0_seq1,comp9654_c0_seq2,comp9654_c0_seq3,comp9654_c0_seq4	3371	3277.15	Q55C58	-	GO:0015629(actin cytoskeleton);GO:0010008(endosome membrane);GO:0030897(HOPS complex);GO:0003779(actin binding);GO:0006886(intracellular protein transport);GO:0042144(vacuole fusion, non-autophagic);GO:0016192(vesicle-mediated transport)	[U] Intracellular trafficking, secretion, and vesicular transport	-	-	1526.92	1231.86	1284.94	1825.92	1529.24	1684.98	10.68	9.73	11.49	15.91	15.78	14.84	1347.91	1680.05	10.6333	15.51	-0.544605	0.544605	0.00235532	0.0535256	no
comp22352_c0	comp22352_c0_seq1	2690	2690	-	-	-	-	-	-	955.26	929.02	682.09	1484.22	1252.07	1269.12	8.15	8.96	7.42	15.79	15.79	13.67	855.457	1335.14	8.17667	15.0833	-0.883371	0.883371	0.00236953	0.0535796	no
comp21606_c0	comp21606_c0_seq1	2166	2166	Q6P4Y0	bifunctional enzyme involved in thiolation and methylation of tRNA	GO:0016021(integral to membrane);GO:0051539(4 iron, 4 sulfur cluster binding);GO:0046872(metal ion binding);GO:0016740(transferase activity);GO:0009451(RNA modification)	[R] General function prediction only	K06168	-	1988.72	1546.43	1578.77	2185.96	1944.39	2254.15	21.21	18.65	21.49	29.09	30.67	30.37	1704.64	2128.17	20.45	30.0433	-0.554944	0.554944	0.00237779	0.0535796	no
comp13456_c0	comp13456_c0_seq1,comp13456_c0_seq2,comp13456_c0_seq3,comp13456_c0_seq4,comp13456_c0_seq5	1983	1644.89	Q0WSN2	-	GO:0043130(ubiquitin binding);GO:0008270(zinc ion binding)	[T] Signal transduction mechanisms ;[Z] Cytoskeleton	-	-	408.99	339.67	278.1	600.03	509.85	574.73	6.55	7.42	6.22	10.25	10.59	10.9	342.253	561.537	6.73	10.58	-0.652661	0.652661	0.00237772	0.0535796	no
comp4856_c1	comp4856_c1_seq1	1090	1090	-	dihydroceramidase	-	[I] Lipid transport and metabolism	K04711	ko00600(Sphingolipid metabolism)	2233.11	2189.32	1754.43	1163.03	1099.07	1312.72	49.03	54.38	49.17	31.87	35.69	36.42	2058.95	1191.61	50.86	34.66	0.55326	0.55326	0.00237307	0.0535796	no
comp15596_c0	comp15596_c0_seq1,comp15596_c0_seq2,comp15596_c0_seq3,comp15596_c0_seq4,comp15596_c0_seq5	1628	1258.6	-	-	-	-	-	-	1691.59	1756.65	1355.04	2535.95	2225.13	2414.04	33.24	39.35	33.9	57.02	58.12	54.76	1601.09	2391.71	35.4967	56.6333	-0.673968	0.673968	0.00238576	0.0535962	no
comp2597_c0	comp2597_c0_seq1,comp2597_c0_seq2	1121	1110.99	Q28G67	-	GO:0005960(glycine cleavage complex);GO:0006546(glycine catabolic process)	[E] Amino acid transport and metabolism	-	-	570.05	524.72	396.11	226.01	197.97	284.01	12.26	12.77	10.88	6.07	6.29	7.72	496.96	235.997	11.97	6.69333	0.838626	0.838626	0.00238953	0.0535962	no
comp4048_c0	comp4048_c0_seq1,comp4048_c0_seq2	2349	2335.67	Q9FUY2	PH-interacting protein	GO:0005634(nucleus);GO:0046982(protein heterodimerization activity);GO:0030154(cell differentiation);GO:0009908(flower development);GO:0080001(mucilage extrusion from seed coat);GO:0045892(negative regulation of transcription, DNA-dependent);GO:0006351(tr	[R] General function prediction only	K11797	-	1548.12	1265.51	1339.64	1949.08	1620.98	1806.11	15.26	14.13	16.86	24.02	23.65	22.47	1384.42	1792.06	15.4167	23.38	-0.600784	0.600784	0.00238695	0.0535962	no
comp15562_c0	comp15562_c0_seq1,comp15562_c0_seq10,comp15562_c0_seq2,comp15562_c0_seq3,comp15562_c0_seq4,comp15562_c0_seq5,comp15562_c0_seq6,comp15562_c0_seq7,comp15562_c0_seq8,comp15562_c0_seq9	2727	1975.57	-	-	-	-	-	-	856.39	752.92	692.56	568.7	465	543.99	9.63	9.47	9.91	8.04	7.38	7.46	767.29	525.897	9.67	7.62667	0.342463	0.342463	0.0023897	0.0535962	no
comp8527_c0	comp8527_c0_seq1,comp8527_c0_seq2	1098	1089.14	-	-	-	-	-	-	2460.17	2102.08	2062.23	1179.02	1053.16	1163	53.86	51.96	57.46	32.43	34.16	32.29	2208.16	1131.73	54.4267	32.96	0.723597	0.723597	0.00238277	0.0535962	no
comp10477_c0	comp10477_c0_seq1,comp10477_c0_seq2,comp10477_c0_seq3,comp10477_c0_seq4	2399	2379.6	Q6DBN5	-	GO:0000151(ubiquitin ligase complex);GO:0004842(ubiquitin-protein ligase activity)	-	-	-	554.12	467.94	530.07	855.02	770.24	860.87	5.36	5.12	6.53	10.35	11.04	10.53	517.377	828.71	5.67	10.64	-0.908078	0.908078	0.00239922	0.0536396	no
comp2565_c0	comp2565_c0_seq1,comp2565_c0_seq2	1980	1381.14	-	-	-	-	-	-	498.72	426.81	429.4	216.98	231.66	235	8.39	9.12	9.45	5	6.2	5.07	451.643	227.88	8.98667	5.42333	0.728606	0.728606	0.00240863	0.0536698	no
comp15963_c0	comp15963_c0_seq1,comp15963_c0_seq10,comp15963_c0_seq11,comp15963_c0_seq12,comp15963_c0_seq13,comp15963_c0_seq14,comp15963_c0_seq15,comp15963_c0_seq16,comp15963_c0_seq17,comp15963_c0_seq18,comp15963_c0_seq2,comp15963_c0_seq3,comp15963_c0_seq4,comp15963_c0	2678	2236.18	O23693	mlo protein	GO:0016021(integral to membrane);GO:0005516(calmodulin binding);GO:0008219(cell death);GO:0006952(defense response);GO:0009607(response to biotic stimulus)	-	K08472	-	550.39	633	484.99	1175.85	827.43	941.83	5.76	7.45	6.58	13.86	12.25	11.68	556.127	981.703	6.59667	12.5967	-0.933233	0.933233	0.00243659	0.0539184	no
comp18249_c0	comp18249_c0_seq1	1448	1448	Q6AYB3	-	GO:0006397(mRNA processing);GO:0008380(RNA splicing)	[A] RNA processing and modification	-	-	6762.44	5404.02	4797.32	3628.29	2767.78	3285.27	109.8	99.25	99.43	73.51	66.47	67.4	5654.59	3227.11	102.827	69.1267	0.5729	0.5729	0.00243664	0.0539184	no
comp14944_c0	comp14944_c0_seq1,comp14944_c0_seq2	3327	2941.74	-	-	-	-	-	-	3726.85	3000.6	2875.89	4708.5	4330.85	4729.9	29.88	28.35	29.1	46.72	50.96	47.13	3201.11	4589.75	29.11	48.27	-0.729612	0.729612	0.00244521	0.0539835	no
comp21800_c0	comp21800_c0_seq1	1804	1804	Q8LPN7	E3 ubiquitin-protein ligase RNF115/126	GO:0016874(ligase activity);GO:0008270(zinc ion binding)	[O] Posttranslational modification, protein turnover, chaperones	K11982	-	1793.13	1264.09	1168.25	2232.57	1784.12	1920.93	23.12	18.44	19.23	35.92	34.03	31.3	1408.49	1979.21	20.2633	33.75	-0.736016	0.736016	0.00244342	0.0539835	no
comp15013_c0	comp15013_c0_seq1	675	675	Q944J0	-	GO:0016021(integral to membrane);GO:0005792(microsome);GO:0005787(signal peptidase complex);GO:0008233(peptidase activity);GO:0006465(signal peptide processing)	-	-	-	2080.11	2016.32	1898.48	860.01	899.34	1126.96	77.21	84.66	89.95	39.83	49.37	52.86	1998.3	962.103	83.94	47.3533	0.825892	0.825892	0.00244726	0.0540039	no
comp20871_c0	comp20871_c0_seq1	4027	4027	Q38953	adenosinetriphosphatase	GO:0005829(cytosol);GO:0005739(mitochondrion);GO:0005634(nucleus);GO:0009506(plasmodesma);GO:0005524(ATP binding);GO:0008026(ATP-dependent helicase activity);GO:0003723(RNA binding);GO:0006397(mRNA processing);GO:0008380(RNA splicing)	[A] RNA processing and modification	K01509	ko00230(Purine metabolism)	2418.78	2129.73	1908.74	3628.91	2897.72	3325.19	13.65	13.6	13.75	25.56	24.19	23.71	2152.42	3283.94	13.6667	24.4867	-0.841335	0.841335	0.00248057	0.0544636	no
comp22398_c0	comp22398_c0_seq1	3290	3290	Q0VGW4	-	GO:0005789(endoplasmic reticulum membrane);GO:0016021(integral to membrane);GO:0046872(metal ion binding);GO:0008237(metallopeptidase activity);GO:0006508(proteolysis)	[O] Posttranslational modification, protein turnover, chaperones ;[R] General function prediction only	-	-	718.83	671.54	458.97	1005.54	786.15	990.85	4.99	5.27	4.06	8.7	8.07	8.68	616.447	927.513	4.77333	8.48333	-0.829634	0.829634	0.00249117	0.054603	no
comp16519_c0	comp16519_c0_seq1	1661	1661	-	-	-	-	-	-	3428.05	2863.96	2533.3	1811.6	1466.32	1987.27	48.19	45.54	45.46	31.78	30.49	35.3	2941.77	1755.06	46.3967	32.5233	0.512546	0.512546	0.0024979	0.054644	no
comp3897_c0	comp3897_c0_seq1,comp3897_c0_seq2	3302	3232.06	-	-	-	[S] Function unknown	-	-	1169.98	1296.91	991	1675.26	1529.94	1576.11	8.25	10.35	8.93	14.74	15.97	14	1152.63	1593.77	9.17667	14.9033	-0.699593	0.699593	0.00251505	0.0547274	no
comp12173_c0	comp12173_c0_seq1,comp12173_c0_seq2	4609	4162.19	Q10CQ8	phytochrome B	GO:0016020(membrane);GO:0005524(ATP binding);GO:0008020(G-protein coupled photoreceptor activity);GO:0042803(protein homodimerization activity);GO:0000155(two-component sensor activity);GO:0018106(peptidyl-histidine phosphorylation);GO:0018298(protein-chr	-	K12121	ko04712(Circadian rhythm - plant)	3505.07	2777.99	2131.63	4631.26	3607.16	4019.78	19.31	17.32	14.89	31.12	28.33	27.26	2804.9	4086.07	17.1733	28.9033	-0.751066	0.751066	0.00251245	0.0547274	no
comp15123_c0	comp15123_c0_seq1,comp15123_c0_seq10,comp15123_c0_seq11,comp15123_c0_seq12,comp15123_c0_seq13,comp15123_c0_seq14,comp15123_c0_seq15,comp15123_c0_seq16,comp15123_c0_seq17,comp15123_c0_seq18,comp15123_c0_seq2,comp15123_c0_seq3,comp15123_c0_seq4,comp15123_c0	7230	6702.16	Q84W41	glutamate receptor, ionotropic, other eukaryote	GO:0016021(integral to membrane);GO:0030288(outer membrane-bounded periplasmic space);GO:0005886(plasma membrane);GO:0005262(calcium channel activity);GO:0005234(extracellular-glutamate-gated ion channel activity);GO:0004965(GABA-B receptor activity);GO:0	[P] Inorganic ion transport and metabolism ;[E] Amino acid transport and metabolism ;[T] Signal transduction mechanisms	K05387	-	3502.25	3376.55	2281.8	5572.21	4625.2	4621.13	11.79	12.9	9.77	23.33	23.06	19.71	3053.53	4939.51	11.4867	22.0333	-0.939728	0.939728	0.00251674	0.0547274	no
comp21580_c0	comp21580_c0_seq1	4358	4358	Q56YN8	structural maintenance of chromosome 3 (chondroitin sulfate proteoglycan 6)	-	[D] Cell cycle control, cell division, chromosome partitioning	K06669	ko04110(Cell cycle);ko04111(Cell cycle - yeast);ko04113(Meiosis - yeast);ko04114(Oocyte meiosis)	2126.08	2051.79	1495.49	3242.06	2681.51	2743.96	11.07	12.09	9.94	21.07	20.65	18.05	1891.12	2889.18	11.0333	19.9233	-0.85259	0.85259	0.00252948	0.05486	no
comp20444_c0	comp20444_c0_seq1	3263	3263	-	-	-	-	-	-	2607.48	2272.59	1906.87	3169.08	2800.31	3486.31	18.24	17.98	17.03	27.66	28.97	30.82	2262.31	3151.9	17.75	29.15	-0.715677	0.715677	0.00252894	0.05486	no
comp18589_c0	comp18589_c0_seq1	1013	1013	P34727	Arf/Sar family, other	GO:0005794(Golgi apparatus);GO:0005525(GTP binding);GO:0015031(protein transport);GO:0007264(small GTPase mediated signal transduction);GO:0016192(vesicle-mediated transport)	[U] Intracellular trafficking, secretion, and vesicular transport	K07977	-	4540.52	3807.18	3949.54	1604.59	1746.06	2208.05	107.88	102.31	119.78	47.57	61.35	66.28	4099.08	1852.9	109.99	58.4	0.913332	0.913332	0.00253166	0.0548824	no
comp19659_c0	comp19659_c0_seq1	943	943	Q94EH2	-	-	[U] Intracellular trafficking, secretion, and vesicular transport	-	-	2980.28	2482.87	2558.36	1146.48	1199.85	1508.07	76.51	72.1	83.84	36.73	45.56	48.92	2673.84	1284.8	77.4833	43.7367	0.825043	0.825043	0.00253284	0.0548832	no
comp18503_c0	comp18503_c0_seq1	1074	1074	P93009	periplasmic divalent cation tolerance protein	GO:0031972(chloroplast intermembrane space);GO:0005507(copper ion binding);GO:0010038(response to metal ion)	[P] Inorganic ion transport and metabolism	K03926	-	3508.97	3226.03	3226.41	1302.35	1512.28	1673.99	78.28	81.41	91.88	36.25	49.9	47.19	3320.47	1496.21	83.8567	44.4467	0.91585	0.91585	0.00254502	0.0550287	no
comp19082_c0	comp19082_c0_seq1	1169	1169	-	-	-	-	-	-	4150.61	3962.58	3850.52	1788.29	1580.48	2140.6	84.56	91.32	100.14	45.46	47.62	55.1	3987.9	1836.46	92.0067	49.3933	0.897422	0.897422	0.0025471	0.0550287	no
comp2665_c0	comp2665_c0_seq1,comp2665_c0_seq2	3003	2872.72	-	-	-	[R] General function prediction only	-	-	879	762.99	878.51	1267.64	1284.91	1417.87	7.05	7.1	8.75	12.92	15.44	14.44	840.167	1323.47	7.63333	14.2667	-0.902263	0.902263	0.00254494	0.0550287	no
comp21525_c0	comp21525_c0_seq1	6937	6937	Q2KJ81	AP-1 complex subunit mu	GO:0030131(clathrin adaptor complex);GO:0030665(clathrin coated vesicle membrane);GO:0005794(Golgi apparatus);GO:0006886(intracellular protein transport);GO:0016192(vesicle-mediated transport)	[U] Intracellular trafficking, secretion, and vesicular transport	K12393	ko04142(Lysosome)	3516.84	3127.85	2793.45	4968.65	4546.7	5078.08	11.43	11.5	11.59	20.15	21.86	20.86	3146.05	4864.48	11.5067	20.9567	-0.864939	0.864939	0.00255509	0.0551412	no
comp19655_c0	comp19655_c0_seq1	2093	2093	-	-	-	[R] General function prediction only	-	-	3818.47	3785.28	3161.55	2171.7	1788.78	2310.15	42.19	47.31	44.59	29.94	29.23	32.25	3588.43	2090.21	44.6967	30.4733	0.55262	0.55262	0.00257169	0.0552757	no
comp11185_c0	comp11185_c0_seq1,comp11185_c0_seq2,comp11185_c0_seq3	1318	1213.37	P92964	-	GO:0016607(nuclear speck);GO:0005681(spliceosomal complex);GO:0000166(nucleotide binding);GO:0003723(RNA binding);GO:0000398(nuclear mRNA splicing, via spliceosome)	[A] RNA processing and modification	-	-	2761.46	2498.04	2158.88	2284.58	1900.06	2217.98	52.4	53.89	52.48	58.41	56.89	57.1	2472.79	2134.21	52.9233	57.4667	-0.118821	0.118821	0.00258958	0.0553163	no
comp17829_c0	comp17829_c0_seq1	1047	1047	P54168	-	GO:0046872(metal ion binding);GO:0008081(phosphoric diester hydrolase activity)	-	K06950	-	6157.39	5013.35	4661.4	5595.94	5034.02	5791.98	141.18	130.02	136.42	160.1	170.71	167.79	5277.38	5473.98	135.873	166.2	-0.290658	0.290658	0.00258124	0.0553163	no
comp20385_c0	comp20385_c0_seq1	2032	2032	Q24133	DnaJ homolog, subfamily B, member 4	GO:0005737(cytoplasm);GO:0031072(heat shock protein binding);GO:0051082(unfolded protein binding);GO:0006457(protein folding);GO:0006950(response to stress)	[O] Posttranslational modification, protein turnover, chaperones	K09510	-	3047.44	2792.69	2518.34	1350.32	1119.28	1594.28	34.72	35.99	36.63	19.2	18.86	22.95	2786.16	1354.63	35.78	20.3367	0.81507	0.81507	0.00261836	0.0553551	no
comp40636_c0	comp40636_c0_seq1	297	297	-	-	-	-	-	-	53.46	48.49	39.08	56.01	52.24	57	5.35	5.49	4.99	6.99	7.73	7.2	47.01	55.0833	5.27667	7.30667	-0.469587	0.469587	0.00262224	0.0553551	no
comp20910_c0	comp20910_c0_seq1	1476	1476	Q5EAD5	geranylgeranyl transferase type-1 subunit beta	GO:0004662(CAAX-protein geranylgeranyltransferase activity);GO:0046872(metal ion binding)	[O] Posttranslational modification, protein turnover, chaperones	K11713	-	3453.64	3151.49	3010.97	2027.51	1365.16	1691.08	54.96	56.72	61.16	40.26	32.13	34	3205.37	1694.58	57.6133	35.4633	0.700075	0.700075	0.00260804	0.0553551	no
comp26878_c0	comp26878_c0_seq1	4256	4256	Q9SXL4	two-component system, unclassified family, sensor histidine kinase and response regulator	GO:0016021(integral to membrane);GO:0005886(plasma membrane);GO:0005524(ATP binding);GO:0009927(histidine phosphotransfer kinase activity);GO:0005034(osmosensor activity);GO:0005515(protein binding);GO:0000156(two-component response regulator activity);GO	[T] Signal transduction mechanisms	K11527	-	1282.99	1254.95	908.12	1679.56	1519.55	1533.01	6.84	7.57	6.18	11.18	11.99	10.33	1148.69	1577.37	6.86333	11.1667	-0.702217	0.702217	0.00260639	0.0553551	no
comp4459_c1	comp4459_c1_seq1	217	217	Q9SRX7	large subunit ribosomal protein L22e	GO:0022625(cytosolic large ribosomal subunit);GO:0003735(structural constituent of ribosome);GO:0006412(translation)	[J] Translation, ribosomal structure and biogenesis	K02891	ko03010(Ribosome)	219	218	182.3	85.18	77	115.02	34.17	38.47	36.3	16.58	17.77	22.67	206.433	92.4	36.3133	19.0067	0.933994	0.933994	0.00260408	0.0553551	no
comp15292_c0	comp15292_c0_seq1,comp15292_c0_seq2,comp15292_c0_seq3,comp15292_c0_seq4	3956	3898.86	-	-	-	-	-	-	878.99	726.11	763.7	1224.83	894.04	1168.73	5.06	4.76	5.63	8.94	7.74	8.65	789.6	1095.87	5.15	8.44333	-0.71324	0.71324	0.00261894	0.0553551	no
comp12728_c0	comp12728_c0_seq1,comp12728_c0_seq2,comp12728_c0_seq3,comp12728_c0_seq4,comp12728_c0_seq5,comp12728_c0_seq6	2263	2073.69	-	-	-	[S] Function unknown	-	-	780.46	808.92	671.01	1234.59	1007.69	1365	8.79	10.23	9.66	17.03	16.64	19.16	753.463	1202.43	9.56	17.61	-0.881312	0.881312	0.00263022	0.0554009	no
comp21890_c0	comp21890_c0_seq1	2688	2688	Q9SX31	-	GO:0016021(integral to membrane);GO:0005886(plasma membrane);GO:0005524(ATP binding);GO:0004674(protein serine/threonine kinase activity)	[A] RNA processing and modification	-	-	1287.31	1295.83	1128.84	1581.02	1305.21	1606.83	10.99	12.51	12.3	16.84	16.47	17.33	1237.33	1497.69	11.9333	16.88	-0.500318	0.500318	0.00263035	0.0554009	no
comp6556_c0	comp6556_c0_seq1	1308	1308	-	-	-	[O] Posttranslational modification, protein turnover, chaperones	-	-	1138.72	1086.09	958.31	766.63	652.48	705.12	20.59	22.21	22.11	17.29	17.45	16.11	1061.04	708.077	21.6367	16.95	0.352193	0.352193	0.00263061	0.0554009	no
comp4162_c0	comp4162_c0_seq1	1083	1083	Q6DBN4	-	GO:0005789(endoplasmic reticulum membrane);GO:0016021(integral to membrane);GO:0005886(plasma membrane)	[U] Intracellular trafficking, secretion, and vesicular transport	-	-	4406.35	4408	3989.88	2075.82	2053.68	2483.95	97.43	110.24	112.61	57.27	67.16	69.39	4268.08	2204.48	106.76	64.6067	0.724616	0.724616	0.0026358	0.0554131	no
comp31150_c0	comp31150_c0_seq1	455	455	-	-	-	-	-	-	121	118	120.01	185.96	164.01	216.9	7.09	7.82	8.97	13.59	14.2	16.05	119.67	188.957	7.96	14.6133	-0.876445	0.876445	0.00264292	0.0554338	no
comp3947_c0	comp3947_c0_seq1	2137	2137	Q96328	phosphatidylinositol-bisphosphatase	-	[I] Lipid transport and metabolism	K01099	ko00562(Inositol phosphate metabolism);ko04070(Phosphatidylinositol signaling system)	737.11	659	432	915.4	890.7	1007.77	7.97	8.06	5.96	12.35	14.25	13.77	609.37	937.957	7.33	13.4567	-0.876436	0.876436	0.00264599	0.0554338	no
comp6455_c0	comp6455_c0_seq1	1507	1507	P0C897	-	GO:0016021(integral to membrane)	-	-	-	151	108.01	104.81	165.77	153.17	159.79	2.35	1.9	2.08	3.22	3.53	3.14	121.273	159.577	2.11	3.29667	-0.643765	0.643765	0.00264575	0.0554338	no
comp28782_c0	comp28782_c0_seq1	1117	1117	E1U332	-	-	-	K00224	ko00351(1,1,1-Trichloro-2,2-bis(4-chlorophenyl)ethane (DDT));ko00364(Fluorobenzoate degradation);ko00628(Fluorene degradation);ko00640(Propanoate metabolism)	494.39	495.49	431	271.86	226	240.01	10.57	11.99	11.77	7.26	7.15	6.49	473.627	245.957	11.4433	6.96667	0.715967	0.715967	0.00264882	0.0554439	no
comp143168_c0	comp143168_c0_seq1	2185	2185	Q8H157	proton-dependent oligopeptide transporter, POT family	GO:0016021(integral to membrane);GO:0005886(plasma membrane);GO:0015293(symporter activity);GO:0042128(nitrate assimilation);GO:0006857(oligopeptide transport);GO:0009624(response to nematode)	[E] Amino acid transport and metabolism	K03305	-	47	32.07	36	68	58	58	0.5	0.38	0.49	0.9	0.91	0.77	38.3567	61.3333	0.456667	0.86	-0.913195	0.913195	0.0026613	0.0554725	no
comp26914_c0	comp26914_c0_seq1	1600	1600	-	-	-	[R] General function prediction only	-	-	495.76	476.25	434.96	536.99	482.27	545.99	7.25	7.88	8.12	9.8	10.43	10.09	468.99	521.75	7.75	10.1067	-0.383039	0.383039	0.00265803	0.0554725	no
comp16803_c0	comp16803_c0_seq1,comp16803_c0_seq2	1896	1750.59	P28668	prolyl-tRNA synthetase	GO:0005737(cytoplasm);GO:0005524(ATP binding);GO:0004818(glutamate-tRNA ligase activity);GO:0004827(proline-tRNA ligase activity);GO:0003723(RNA binding);GO:0006424(glutamyl-tRNA aminoacylation);GO:0006433(prolyl-tRNA aminoacylation)	[J] Translation, ribosomal structure and biogenesis	K01881	ko00970(Aminoacyl-tRNA biosynthesis)	7237.05	5944.61	5670.27	7284.39	5974.43	6926.98	93.57	87.37	95.84	120.12	112.73	113.34	6283.98	6728.6	92.26	115.397	-0.322824	0.322824	0.00266029	0.0554725	no
comp20303_c0	comp20303_c0_seq1	1679	1679	P55034	26S proteasome regulatory subunit N10	GO:0005829(cytosol);GO:0016020(membrane);GO:0005634(nucleus);GO:0000502(proteasome complex);GO:0001653(peptide receptor activity);GO:0008270(zinc ion binding);GO:0006281(DNA repair);GO:0048366(leaf development);GO:0010150(leaf senescence);GO:0009555(polle	[O] Posttranslational modification, protein turnover, chaperones	K03029	ko03050(Proteasome)	2324.21	2120.33	1819.29	1234.55	1119.25	1381.34	32.31	33.34	32.28	21.41	23.01	24.26	2087.94	1245.05	32.6433	22.8933	0.511861	0.511861	0.00265721	0.0554725	no
comp20795_c0	comp20795_c0_seq1	2401	2401	Q8RXN0	ATP-binding cassette, subfamily G (WHITE), member 2	GO:0009897(external side of plasma membrane);GO:0016021(integral to membrane);GO:0005524(ATP binding);GO:0016887(ATPase activity);GO:0015245(fatty acid transporter activity);GO:0080051(cutin transport);GO:0009737(response to abscisic acid stimulus);GO:000	[Q] Secondary metabolites biosynthesis, transport and catabolism	K05681	ko02010(ABC transporters)	789.76	662.62	621.98	1042.81	954.97	1144.19	7.57	7.19	7.61	12.47	13.54	13.86	691.453	1047.32	7.45667	13.29	-0.833738	0.833738	0.00266637	0.0554725	no
comp15550_c0	comp15550_c0_seq1,comp15550_c0_seq10,comp15550_c0_seq11,comp15550_c0_seq12,comp15550_c0_seq13,comp15550_c0_seq14,comp15550_c0_seq15,comp15550_c0_seq16,comp15550_c0_seq17,comp15550_c0_seq18,comp15550_c0_seq19,comp15550_c0_seq2,comp15550_c0_seq20,comp15550_	2682	1711.69	Q9LPC4	-	-	[R] General function prediction only	-	-	2361.93	2398.57	2002.72	3301.18	3354.9	3589.34	32.5	39.44	36.38	59.26	69.92	64.91	2254.41	3415.14	36.1067	64.6967	-0.841426	0.841426	0.00267209	0.0555239	no
comp12860_c0	comp12860_c0_seq1,comp12860_c0_seq2,comp12860_c0_seq3,comp12860_c0_seq4,comp12860_c0_seq5,comp12860_c0_seq6	1408	1147.5	-	-	-	-	-	-	690.88	638	628.05	478.28	350.96	435.97	15.55	16.64	17.45	12.37	10.46	11.28	652.31	421.737	16.5467	11.37	0.541308	0.541308	0.00268035	0.0555598	no
comp11102_c0	comp11102_c0_seq1	2805	2805	P35135	ubiquitin-conjugating enzyme E2 D/E	GO:0005524(ATP binding);GO:0004842(ubiquitin-protein ligase activity)	[O] Posttranslational modification, protein turnover, chaperones	K06689	ko04120(Ubiquitin mediated proteolysis)	5305.46	5274.87	4958.84	2806.25	2065.37	2222.69	43.34	48.74	51.71	28.6	24.95	22.94	5179.72	2364.77	47.93	25.4967	0.91062	0.91062	0.00268402	0.0555598	no
comp10611_c0	comp10611_c0_seq1,comp10611_c0_seq2	2780	2701.29	Q94A51	-	GO:0005886(plasma membrane);GO:0000151(ubiquitin ligase complex);GO:0005524(ATP binding);GO:0004672(protein kinase activity);GO:0004842(ubiquitin-protein ligase activity)	-	K00924	-	482.05	511.68	318.94	752	635	661.26	4.06	4.79	3.38	8.05	7.97	7.08	437.557	682.753	4.07667	7.7	-0.917468	0.917468	0.00270252	0.0556048	no
comp6039_c0	comp6039_c0_seq1	1826	1826	-	-	-	[S] Function unknown	-	-	933.8	837	689.12	348.12	352.32	450.99	11.89	12.06	11.2	5.53	6.64	7.26	819.973	383.81	11.7167	6.47667	0.855239	0.855239	0.00270186	0.0556048	no
comp6346_c0	comp6346_c0_seq1	3686	3686	Q6PFD9	-	-	[Y] Nuclear structure ;[U] Intracellular trafficking, secretion, and vesicular transport	-	-	2331.33	1752.52	1996.4	2802	2717.67	3097.56	14.4	12.24	15.74	21.59	24.83	24.17	2026.75	2872.41	14.1267	23.53	-0.73608	0.73608	0.00270686	0.0556048	no
comp18676_c0	comp18676_c0_seq1	1100	1100	Q9ZRE2	Rab family, other	GO:0005886(plasma membrane);GO:0032588(trans-Golgi network membrane);GO:0005525(GTP binding);GO:0030742(GTP-dependent protein binding);GO:0080115(myosin XI tail binding);GO:0006888(ER to Golgi vesicle-mediated transport);GO:0015031(protein transport);GO:0	[T] Signal transduction mechanisms ;[U] Intracellular trafficking, secretion, and vesicular transport	K07976	-	4747.9	4255.18	3413.86	2025.41	1684.93	1902.9	103.24	104.65	94.75	54.95	54.19	52.28	4138.98	1871.08	100.88	53.8067	0.906783	0.906783	0.00269671	0.0556048	no
comp6580_c0	comp6580_c0_seq1,comp6580_c0_seq2	1449	1440.64	P96554	tellurite resistance protein TerC	GO:0016021(integral to membrane);GO:0005886(plasma membrane)	-	K05794	-	442	326.42	347.57	484.71	453.46	520.02	7.22	5.99	7.25	9.84	10.95	10.71	371.997	486.063	6.82	10.5	-0.622546	0.622546	0.00271379	0.0556153	no
comp13575_c0	comp13575_c0_seq1,comp13575_c0_seq2,comp13575_c0_seq3,comp13575_c0_seq4,comp13575_c0_seq5,comp13575_c0_seq6	2400	2357.75	-	-	-	-	-	-	1252.76	1362.26	1029.81	2004.35	1522.75	1699.34	12.23	15.04	12.83	24.43	22	20.97	1214.94	1742.15	13.3667	22.4667	-0.749146	0.749146	0.00271849	0.0556417	no
comp14555_c1	comp14555_c1_seq1,comp14555_c1_seq2,comp14555_c1_seq3,comp14555_c1_seq4,comp14555_c1_seq5,comp14555_c1_seq6	1869	1660.54	-	lupus La protein	-	[R] General function prediction only	K11090	ko05322(Systemic lupus erythematosus)	1131.82	1096.92	686.57	1549.09	1367.3	1832.13	15.89	17.39	12.38	27.46	28.54	32.62	971.77	1582.84	15.22	29.54	-0.956701	0.956701	0.00272386	0.0557265	no
comp19034_c0	comp19034_c0_seq1	808	808	Q9FMP4	-	GO:0005634(nucleus);GO:0000166(nucleotide binding);GO:0003723(RNA binding);GO:0006397(mRNA processing);GO:0008380(RNA splicing)	[R] General function prediction only	-	-	3889.1	3416.96	2723.35	1966.14	1313.96	1473.09	118.21	117.47	105.66	74.57	59.07	56.57	3343.14	1584.4	113.78	63.4033	0.843616	0.843616	0.00273504	0.05583	no
comp17966_c0	comp17966_c0_seq1	1526	1526	-	-	-	-	-	-	3919.08	3339.27	2239.94	5475.41	4027.93	5206.42	60.21	58.03	43.93	104.97	91.53	101.07	3166.1	4903.25	54.0567	99.19	-0.875722	0.875722	0.00274232	0.055866	no
comp16493_c0	comp16493_c0_seq1,comp16493_c0_seq10,comp16493_c0_seq11,comp16493_c0_seq12,comp16493_c0_seq13,comp16493_c0_seq14,comp16493_c0_seq15,comp16493_c0_seq16,comp16493_c0_seq17,comp16493_c0_seq18,comp16493_c0_seq19,comp16493_c0_seq2,comp16493_c0_seq20,comp16493_	6091	3760.84	Q9SJK3	argonaute	GO:0030529(ribonucleoprotein complex);GO:0003723(RNA binding);GO:0006952(defense response);GO:0031047(gene silencing by RNA);GO:0006355(regulation of transcription, DNA-dependent);GO:0006417(regulation of translation);GO:0006351(transcription, DNA-depende	[J] Translation, ribosomal structure and biogenesis	K11596	-	6375.69	5621.31	3895.69	9469.73	7337.57	7567.73	35.27	35.77	26.92	65.97	61.65	55.12	5297.56	8125.01	32.6533	60.9133	-0.899528	0.899528	0.00277401	0.0558921	no
comp6842_c0	comp6842_c0_seq1,comp6842_c0_seq2	1543	1469.54	Q02283	homeobox-leucine zipper protein	GO:0005634(nucleus);GO:0042803(protein homodimerization activity);GO:0043565(sequence-specific DNA binding);GO:0003700(sequence-specific DNA binding transcription factor activity);GO:0009965(leaf morphogenesis);GO:0045893(positive regulation of transcript	[K] Transcription	K09338	-	806.66	812.68	612.2	954.21	849.28	1070.27	13	14.79	12.57	18.94	20.05	21.53	743.847	957.92	13.4533	20.1733	-0.584486	0.584486	0.0027655	0.0558921	no
comp24221_c0	comp24221_c0_seq1	1280	1280	Q501G6	-	GO:0016021(integral to membrane);GO:0005886(plasma membrane)	-	-	-	1424.33	1375.93	1129.73	542.62	583	713.27	26.35	28.79	26.68	12.52	15.95	16.67	1310	612.963	27.2733	15.0467	0.858047	0.858047	0.00275672	0.0558921	no
comp6632_c0	comp6632_c0_seq1,comp6632_c0_seq2	1726	1636.27	Q9SI62	3-oxo-5-alpha-steroid 4-dehydrogenase 3	GO:0005789(endoplasmic reticulum membrane);GO:0016021(integral to membrane);GO:0016627(oxidoreductase activity, acting on the CH-CH group of donors);GO:0006629(lipid metabolic process)	[I] Lipid transport and metabolism	K12345	ko00140(Steroid hormone biosynthesis)	1650.6	1495.07	1201.26	736.06	776.62	880.44	23.64	23.52	21.99	13.88	16.65	15.85	1448.98	797.707	23.05	15.46	0.576226	0.576226	0.00276885	0.0558921	no
comp4467_c0	comp4467_c0_seq1	2103	2103	-	-	-	[S] Function unknown	-	-	4337.88	4302.11	3769.11	2330	2205.38	2452.08	47.7	53.5	52.9	31.97	35.86	34.06	4136.37	2329.15	51.3667	33.9633	0.596854	0.596854	0.00275782	0.0558921	no
comp12610_c1	comp12610_c1_seq1,comp12610_c1_seq2	637	536.43	-	-	-	-	-	-	15	10	6	8	17	14	0.63	0.45	0.48	0.94	1	1.11	10.3333	13	0.52	1.01667	-0.967263	0.967263	0.00277353	0.0558921	no
comp5177_c0	comp5177_c0_seq1,comp5177_c0_seq2	3681	3614.79	P09886	-	GO:0009507(chloroplast);GO:0006950(response to stress)	[O] Posttranslational modification, protein turnover, chaperones	-	-	1340.68	1120.56	1116.7	654.56	591	644.51	8.5	7.96	8.92	5.09	5.45	5.11	1192.65	630.023	8.46	5.21667	0.697529	0.697529	0.00276897	0.0558921	no
comp21918_c0	comp21918_c0_seq1	3680	3680	Q15029	elongation factor EF-2	GO:0015030(Cajal body);GO:0071013(catalytic step 2 spliceosome);GO:0005737(cytoplasm);GO:0016607(nuclear speck);GO:0005525(GTP binding);GO:0003924(GTPase activity);GO:0005515(protein binding);GO:0000398(nuclear mRNA splicing, via spliceosome)	[J] Translation, ribosomal structure and biogenesis	K03234	-	1467.01	1318.61	1384.7	2026.8	1988.09	2327.26	9.08	9.23	10.94	15.65	18.19	18.19	1390.11	2114.05	9.75	17.3433	-0.830907	0.830907	0.00276699	0.0558921	no
comp24532_c0	comp24532_c0_seq1	344	344	-	-	-	-	-	-	497.52	388.22	404.48	182.07	209.11	198.06	41.11	36.28	42.66	18.77	25.55	20.68	430.073	196.413	40.0167	21.6667	0.885124	0.885124	0.00277723	0.0559127	no
comp9258_c0	comp9258_c0_seq1,comp9258_c0_seq2,comp9258_c0_seq3	1355	1249.2	-	-	-	-	-	-	643.62	582.69	592.81	719.18	747	835.36	11.61	12.04	14.09	19.65	23.03	22.29	606.373	767.18	12.58	21.6567	-0.783679	0.783679	0.00278743	0.0559304	no
comp13160_c0	comp13160_c0_seq1,comp13160_c0_seq2	3728	3705.35	-	-	-	[L] Replication, recombination and repair ;[K] Transcription	-	-	877.86	877.64	812	1192.99	1006.06	1056.99	5.41	6.09	6.38	9.15	9.17	8.19	855.833	1085.35	5.96	8.83667	-0.56819	0.56819	0.00278869	0.0559304	no
comp5970_c0	comp5970_c0_seq1,comp5970_c0_seq2	2100	2063.01	Q56X76	ATP-dependent RNA helicase RhlE	GO:0009507(chloroplast);GO:0005524(ATP binding);GO:0008026(ATP-dependent helicase activity);GO:0070180(LSU rRNA binding);GO:0080158(chloroplast ribulose bisphosphate carboxylase complex biogenesis)	[A] RNA processing and modification	K11927	ko03018(RNA degradation)	567.11	478	588	904.95	879.54	915.84	6.43	6.12	8.45	12.73	14.56	12.95	544.37	900.11	7	13.4133	-0.938241	0.938241	0.00281255	0.0561076	no
comp4863_c0	comp4863_c0_seq1,comp4863_c0_seq2	4327	4021	Q9SHY2	ATP-dependent RNA helicase	GO:0016021(integral to membrane);GO:0005886(plasma membrane);GO:0055085(transmembrane transport)	-	K11594	ko04622(RIG-I-like receptor signaling pathway)	4805.94	4258.15	4075.51	5761.26	4590.59	5680.41	26.28	26.64	28.48	41.1	36.89	39.03	4379.87	5344.09	27.1333	39.0067	-0.523654	0.523654	0.00283357	0.0563148	no
comp18260_c0	comp18260_c0_seq1	3027	3027	Q8LGH4	cullin 4	GO:0031461(cullin-RING ubiquitin ligase complex);GO:0005829(cytosol);GO:0005634(nucleus);GO:0031625(ubiquitin protein ligase binding);GO:0009738(abscisic acid mediated signaling pathway);GO:0048825(cotyledon development);GO:0006281(DNA repair);GO:0009908(	[D] Cell cycle control, cell division, chromosome partitioning	K10609	ko03420(Nucleotide excision repair);ko04120(Ubiquitin mediated proteolysis)	5510.1	4247.54	4409.38	5806.7	5257.23	6170.98	41.63	36.3	42.52	54.74	58.74	58.9	4722.34	5744.97	40.15	57.46	-0.517158	0.517158	0.00283951	0.0563161	no
comp5440_c0	comp5440_c0_seq1	1724	1724	-	-	-	-	-	-	1303.68	1156.35	1034.71	674.07	605	630.99	17.63	17.68	17.86	11.37	12.1	10.78	1164.91	636.687	17.7233	11.4167	0.634508	0.634508	0.00283605	0.0563161	no
comp20939_c0	comp20939_c0_seq1	2904	2904	Q9SNC6	-	GO:0005829(cytosol);GO:0005634(nucleus);GO:0000151(ubiquitin ligase complex);GO:0070696(transmembrane receptor protein serine/threonine kinase binding);GO:0004842(ubiquitin-protein ligase activity);GO:0042742(defense response to bacterium)	[S] Function unknown	-	-	3346.1	3463.18	2489.33	4704.45	3982.11	4889.56	26.38	30.88	25.05	46.28	46.43	48.7	3099.54	4525.37	27.4367	47.1367	-0.780745	0.780745	0.00285304	0.0563527	no
comp4967_c1	comp4967_c1_seq1	369	369	-	-	-	-	-	-	104	85	81.05	54	50.32	62	7.86	7.27	7.82	5.1	5.63	5.92	90.0167	55.44	7.65	5.55	0.462972	0.462972	0.002848	0.0563527	no
comp15008_c0	comp15008_c0_seq1,comp15008_c0_seq10,comp15008_c0_seq11,comp15008_c0_seq12,comp15008_c0_seq2,comp15008_c0_seq3,comp15008_c0_seq4,comp15008_c0_seq5,comp15008_c0_seq6,comp15008_c0_seq7,comp15008_c0_seq8,comp15008_c0_seq9	2411	1698.6	Q9P6I5	guanylate kinase	GO:0005737(cytoplasm);GO:0005634(nucleus);GO:0005524(ATP binding);GO:0004385(guanylate kinase activity);GO:0031506(cell wall glycoprotein biosynthetic process);GO:0046037(GMP metabolic process);GO:0006183(GTP biosynthetic process)	[F] Nucleotide transport and metabolism	K00942	ko00230(Purine metabolism)	1211.99	1320.68	970.4	1348.8	1485	1590	15.36	19.65	15.57	28.16	31.23	28.4	1167.69	1474.6	16.86	29.2633	-0.79549	0.79549	0.00285427	0.0563527	no
comp10495_c0	comp10495_c0_seq1,comp10495_c0_seq2	913	877.69	-	-	-	-	-	-	308.68	303.98	246	195.65	158	205	8.62	9.42	8.73	6.69	6.41	7.11	286.22	186.217	8.92333	6.73667	0.405548	0.405548	0.00286341	0.056394	no
comp4101_c0	comp4101_c0_seq1,comp4101_c0_seq2	1529	1268.41	B4FUS3	-	GO:0016021(integral to membrane)	-	-	-	9836.5	7862.53	7473.32	5497.17	4824.11	6126.1	186.65	168.35	181.35	121.39	129.73	139.07	8390.78	5482.46	178.783	130.063	0.458998	0.458998	0.00287654	0.0564723	no
comp8719_c0	comp8719_c0_seq1,comp8719_c0_seq2	3450	2764.52	Q9LFA2	protein-serine/threonine kinase	GO:0005737(cytoplasm);GO:0005634(nucleus);GO:0005524(ATP binding);GO:0005515(protein binding);GO:0004674(protein serine/threonine kinase activity)	[R] General function prediction only	K08286	-	2051.13	1971.12	1490.23	2962.65	2471.22	2810.81	19.94	22.42	19.92	30.87	31.4	30.3	1837.49	2748.23	20.76	30.8567	-0.571776	0.571776	0.00287724	0.0564723	no
comp9954_c0	comp9954_c0_seq1,comp9954_c0_seq2,comp9954_c0_seq3	1754	1655.83	-	-	-	-	-	-	478.99	524.05	447.49	671.91	616	652.02	6.81	8.41	8.06	11.64	12.76	11.6	483.51	646.643	7.76	12	-0.628906	0.628906	0.00287214	0.0564723	no
comp23206_c0	comp23206_c0_seq1	2603	2603	-	-	-	-	-	-	916.03	772.99	631.62	1069.81	1015.19	1206.04	8.08	7.71	7.11	11.78	13.24	13.44	773.547	1097.01	7.63333	12.82	-0.748011	0.748011	0.00287928	0.0564749	no
comp29918_c0	comp29918_c0_seq1	3948	3948	-	-	-	[S] Function unknown	-	-	613.18	649.62	449.3	891.55	741.67	777.38	3.53	4.23	3.3	6.41	6.32	5.66	570.7	803.533	3.68667	6.13	-0.73357	0.73357	0.00288873	0.0565066	no
comp12651_c0	comp12651_c0_seq1,comp12651_c0_seq2,comp12651_c0_seq3	1561	1484.03	Q39211	DNA-directed RNA polymerase II subunit C	GO:0005737(cytoplasm);GO:0005665(DNA-directed RNA polymerase II, core complex);GO:0000418(DNA-directed RNA polymerase IV complex);GO:0000419(DNA-directed RNA polymerase V complex);GO:0005730(nucleolus);GO:0003677(DNA binding);GO:0003899(DNA-directed RNA p	[K] Transcription	K03011	ko00230(Purine metabolism);ko00240(Pyrimidine metabolism);ko03020(RNA polymerase);ko05016(Huntington's disease)	3712.59	3688.94	3019.05	1714.79	1376.42	1622.97	58.68	66	60.75	34.03	31.74	32.22	3473.53	1571.39	61.81	32.6633	0.920168	0.920168	0.00289214	0.0565166	no
comp20638_c0	comp20638_c0_seq1	1142	1142	-	-	-	-	-	-	1597	1302.73	1365.41	657.54	693.96	733.22	33.36	30.78	36.41	17.14	21.44	19.35	1421.71	694.907	33.5167	19.31	0.795531	0.795531	0.00289183	0.0565166	no
comp3011_c0	comp3011_c0_seq1	866	866	-	-	-	-	-	-	400.21	405	365.28	178.14	190.55	215.02	11.27	12.9	13.13	6.26	7.94	7.65	390.163	194.57	12.4333	7.28333	0.771542	0.771542	0.00289665	0.05656	no
comp18471_c0	comp18471_c0_seq1	1198	1198	O49203	nucleoside-diphosphate kinase	GO:0009543(chloroplast thylakoid lumen);GO:0005743(mitochondrial inner membrane);GO:0005758(mitochondrial intermembrane space);GO:0005524(ATP binding);GO:0050897(cobalt ion binding);GO:0004550(nucleoside diphosphate kinase activity);GO:0008270(zinc ion bi	[F] Nucleotide transport and metabolism	K00940	ko00230(Purine metabolism);ko00240(Pyrimidine metabolism)	3105.37	3095.77	2264.81	1106.04	1061.81	1486.29	61.64	69.5	57.38	27.39	31.17	37.27	2821.98	1218.05	62.84	31.9433	0.976168	0.976168	0.00289912	0.0565628	no
comp16901_c2	comp16901_c2_seq1,comp16901_c2_seq10,comp16901_c2_seq11,comp16901_c2_seq12,comp16901_c2_seq13,comp16901_c2_seq14,comp16901_c2_seq15,comp16901_c2_seq16,comp16901_c2_seq17,comp16901_c2_seq18,comp16901_c2_seq19,comp16901_c2_seq2,comp16901_c2_seq20,comp16901_	4717	2490.05	-	-	-	-	-	-	8859.69	7771.39	6079.19	9979.66	9699.53	9962.62	79.04	80.93	75.05	117.52	126.05	113.29	7570.09	9880.6	78.34	118.953	-0.602575	0.602575	0.00291004	0.0565906	no
comp16821_c0	comp16821_c0_seq1,comp16821_c0_seq10,comp16821_c0_seq11,comp16821_c0_seq2,comp16821_c0_seq3,comp16821_c0_seq4,comp16821_c0_seq5,comp16821_c0_seq6,comp16821_c0_seq7,comp16821_c0_seq8,comp16821_c0_seq9	3044	1965.67	Q9FMA3	-	GO:0005778(peroxisomal membrane);GO:0005515(protein binding);GO:0004872(receptor activity);GO:0006625(protein targeting to peroxisome);GO:0009733(response to auxin stimulus);GO:0055085(transmembrane transport)	[R] General function prediction only	-	-	1687.6	1511.51	1370.28	2125.74	1954.86	2092.08	24.01	26.27	27.89	36.26	38.09	34.32	1523.13	2057.56	26.0567	36.2233	-0.475267	0.475267	0.00291034	0.0565906	no
comp12203_c1	comp12203_c1_seq1,comp12203_c1_seq2	2045	1812.2	Q9SK28	-	GO:0003779(actin binding);GO:0004721(phosphoprotein phosphatase activity);GO:0030036(actin cytoskeleton organization)	-	-	-	410.01	322	259.01	564.67	509.88	517	6	5.52	4.69	9.09	9.78	8.35	330.34	530.517	5.40333	9.07333	-0.747783	0.747783	0.00291579	0.0566075	no
comp16629_c1	comp16629_c1_seq1,comp16629_c1_seq10,comp16629_c1_seq11,comp16629_c1_seq12,comp16629_c1_seq13,comp16629_c1_seq14,comp16629_c1_seq15,comp16629_c1_seq16,comp16629_c1_seq17,comp16629_c1_seq18,comp16629_c1_seq19,comp16629_c1_seq2,comp16629_c1_seq20,comp16629_	4576	1726.37	O14327	-	GO:0005634(nucleus);GO:0000166(nucleotide binding);GO:0008143(poly(A) RNA binding);GO:0005515(protein binding);GO:0000289(nuclear-transcribed mRNA poly(A) tail shortening)	[A] RNA processing and modification	-	-	12182.3	11706.6	10869.9	8986.61	7601.31	8472.11	179.63	187.07	194.37	147.35	156.01	146.03	11586.3	8353.34	187.023	149.797	0.320213	0.320213	0.00292152	0.0566436	no
comp4836_c0	comp4836_c0_seq1,comp4836_c0_seq2	1242	1225.8	-	-	-	-	-	-	751.24	619.83	523.41	384.57	319.98	418.12	14.55	13.58	12.93	9.29	9.16	10.24	631.493	374.223	13.6867	9.56333	0.517186	0.517186	0.00293943	0.056703	no
comp9739_c0	comp9739_c0_seq1,comp9739_c0_seq2	2396	2106.73	-	-	-	-	-	-	2188.87	1981.32	1691.92	2930.82	2558.36	3177.84	23.03	23.78	23.08	39.28	40.42	43.1	1954.04	2889.01	23.2967	40.9333	-0.813153	0.813153	0.00294611	0.056765	no
comp16634_c2	comp16634_c2_seq1,comp16634_c2_seq10,comp16634_c2_seq11,comp16634_c2_seq12,comp16634_c2_seq13,comp16634_c2_seq14,comp16634_c2_seq15,comp16634_c2_seq16,comp16634_c2_seq17,comp16634_c2_seq18,comp16634_c2_seq19,comp16634_c2_seq2,comp16634_c2_seq20,comp16634_	3675	1555.76	-	biotin--protein ligase	-	[H] Coenzyme transport and metabolism	K01942	ko00780(Biotin metabolism)	2955.01	2609.4	2233.43	4419.14	3524.11	3866.4	56.38	55.97	55.29	71.09	73.2	69.39	2599.28	3936.55	55.88	71.2267	-0.350085	0.350085	0.00295586	0.0567975	no
comp19253_c0	comp19253_c0_seq1	1240	1240	Q8LGF7	peroxin-4	GO:0005778(peroxisomal membrane);GO:0005524(ATP binding);GO:0005515(protein binding);GO:0004842(ubiquitin-protein ligase activity);GO:0006635(fatty acid beta-oxidation);GO:0016558(protein import into peroxisome matrix)	[O] Posttranslational modification, protein turnover, chaperones	K10689	-	2668.85	2461.4	2471.59	1151.1	1002	1382.19	51.06	53.27	60.36	27.48	28.35	33.41	2533.95	1178.43	54.8967	29.7467	0.883991	0.883991	0.00296155	0.0567975	no
comp5394_c0	comp5394_c0_seq1	4298	4298	-	-	-	-	-	-	1363.37	1258.98	1286	2449.93	1874.78	2034.09	7.2	7.52	8.67	16.15	14.64	13.57	1302.78	2119.6	7.79667	14.7867	-0.923368	0.923368	0.00295969	0.0567975	no
comp21823_c0	comp21823_c0_seq1	1820	1820	-	-	-	[S] Function unknown	-	-	1824.99	1615.98	1384.91	1033.46	799.6	881.81	23.32	23.36	22.59	16.48	15.11	14.24	1608.63	904.957	23.09	15.2767	0.595938	0.595938	0.00297461	0.0568799	no
comp13392_c0	comp13392_c0_seq1,comp13392_c0_seq2	1677	1514.07	P37707	-	-	-	-	-	2891.75	2631.82	2577.87	4708.1	4135.01	4462.5	51.74	49.69	59.14	97	99.04	97.38	2700.48	4435.2	53.5233	97.8067	-0.869765	0.869765	0.00296787	0.0568799	no
comp8128_c1	comp8128_c1_seq1	241	241	-	-	-	-	-	-	27	30.02	25	41	35.01	36	3.61	4.54	4.26	6.83	6.92	6.08	27.34	37.3367	4.13667	6.61	-0.676182	0.676182	0.00297578	0.0568799	no
comp54685_c0	comp54685_c0_seq1	878	878	-	-	-	-	-	-	188.63	148.98	123.11	66	66.4	64	5.23	4.68	4.36	2.29	2.73	2.24	153.573	65.4667	4.75667	2.42	0.974944	0.974944	0.00299001	0.0570148	no
comp38002_c0	comp38002_c0_seq1	721	721	-	-	-	-	-	-	216	180.83	158.51	90	89.71	110	7.45	7.05	6.98	3.87	4.57	4.79	185.113	96.57	7.16	4.41	0.699181	0.699181	0.00298976	0.0570148	no
comp12480_c0	comp12480_c0_seq1,comp12480_c0_seq2,comp12480_c0_seq3	1845	1488.53	O22827	molybdenum cofactor biosynthesis protein E	GO:0005737(cytoplasm);GO:0016740(transferase activity);GO:0006777(Mo-molybdopterin cofactor biosynthetic process)	[H] Coenzyme transport and metabolism	K03635	-	724.78	513.52	400.76	868.69	812.04	972.46	11.6	9.17	8.24	16.78	18.71	19.44	546.353	884.397	9.67	18.31	-0.921044	0.921044	0.00299396	0.0570457	no
comp12834_c0	comp12834_c0_seq1	837	837	-	-	-	[M] Cell wall/membrane/envelope biogenesis	-	-	4432.75	3633.46	2856.98	1441.17	1416.06	1886.71	129.61	120.17	106.63	52.58	61.24	69.7	3641.06	1581.31	118.803	61.1733	0.957601	0.957601	0.00303636	0.0573259	no
comp20566_c0	comp20566_c0_seq1	3047	3047	C0LGS3	-	GO:0016021(integral to membrane);GO:0005524(ATP binding);GO:0004674(protein serine/threonine kinase activity);GO:0004872(receptor activity)	-	K00924	-	4539.95	3676.52	3052.2	2166.36	1553.05	2201.74	34.07	31.21	29.24	20.28	17.24	20.87	3756.22	1973.72	31.5067	19.4633	0.694898	0.694898	0.00303853	0.0573259	no
comp21277_c0	comp21277_c0_seq1	1231	1231	Q9SJZ6	-	-	[S] Function unknown	-	-	2026.29	1891.27	1828.38	950	905.92	1190	39.07	41.25	45	22.86	25.83	28.99	1915.31	1015.31	41.7733	25.8933	0.690002	0.690002	0.00304262	0.0573581	no
comp20251_c0	comp20251_c0_seq1	1896	1896	Q84XV2	bromodomain-containing protein 4	GO:0005634(nucleus);GO:0010030(positive regulation of seed germination);GO:0045893(positive regulation of transcription, DNA-dependent);GO:0006351(transcription, DNA-dependent)	[K] Transcription	K11722	-	3579.65	3027.51	2493.63	2067.76	1542.02	1746.81	43.83	41.93	38.97	31.59	27.92	27.02	3033.6	1785.53	41.5767	28.8433	0.527536	0.527536	0.00305465	0.0574587	no
comp18863_c0	comp18863_c0_seq1	1416	1416	-	pyruvate dehydrogenase E2 component (dihydrolipoamide acetyltransferase)	-	[R] General function prediction only	K00627	ko00010(Glycolysis / Gluconeogenesis);ko00020(Citrate cycle (TCA cycle));ko00620(Pyruvate metabolism)	6129.14	5475.77	5343.9	2557.39	2565.83	3359.16	101.89	102.96	113.4	53.05	63.08	70.56	5649.6	2827.46	106.083	62.23	0.769516	0.769516	0.00307453	0.0575079	no
comp3925_c0	comp3925_c0_seq1	4202	4202	Q9XIE6	phospholipid-translocating ATPase	GO:0005789(endoplasmic reticulum membrane);GO:0000139(Golgi membrane);GO:0016021(integral to membrane);GO:0005886(plasma membrane);GO:0005524(ATP binding);GO:0015662(ATPase activity, coupled to transmembrane movement of ions, phosphorylative mechanism);GO	[R] General function prediction only	K01530	-	1541.01	1218.77	1204.95	2212.67	2147.08	2241.7	8.33	7.45	8.31	14.92	17.16	15.31	1321.58	2200.48	8.03	15.7967	-0.976148	0.976148	0.00306472	0.0575079	no
comp6275_c0	comp6275_c0_seq1,comp6275_c0_seq2	2000	1271.98	Q96NC0	-	GO:0005634(nucleus);GO:0003677(DNA binding);GO:0008270(zinc ion binding)	[R] General function prediction only	-	-	3049.87	2417.82	2263.73	1393.07	1324.67	1639.32	59.53	52.03	54.86	31.58	36.29	39.11	2577.14	1452.35	55.4733	35.66	0.637488	0.637488	0.00307397	0.0575079	no
comp14706_c0	comp14706_c0_seq1,comp14706_c0_seq2,comp14706_c0_seq3	2055	1739.75	Q945S8	histone-lysine N-methyltransferase NSD1/2	GO:0000775(chromosome, centromeric region);GO:0005783(endoplasmic reticulum);GO:0005634(nucleus);GO:0009506(plasmodesma);GO:0018024(histone-lysine N-methyltransferase activity)	[K] Transcription	K11424	ko00310(Lysine degradation)	860.99	877.82	742.87	1278.3	1134.35	1293.79	10.04	12.09	11.37	19.69	20.09	20.15	827.227	1235.48	11.1667	19.9767	-0.839117	0.839117	0.00309252	0.0575436	no
comp3639_c0	comp3639_c0_seq1	1401	1401	-	-	-	-	-	-	253	260.89	226.38	93.03	116	109	4.25	4.96	4.86	1.95	2.88	2.32	246.757	106.01	4.69	2.38333	0.976607	0.976607	0.00311835	0.057597	no
comp6456_c0	comp6456_c0_seq1,comp6456_c0_seq2	4767	4508.07	Q8T2I8	-	GO:0005815(microtubule organizing center);GO:0005524(ATP binding);GO:0004674(protein serine/threonine kinase activity);GO:0007049(cell cycle);GO:0051301(cell division)	[T] Signal transduction mechanisms	K00924	-	2393.36	2140.2	2372.15	4031.09	4098.26	4477.44	12.98	13.06	15.92	24.46	29.54	27.92	2301.9	4202.26	13.9867	27.3067	-0.965201	0.965201	0.00311901	0.057597	no
comp23830_c0	comp23830_c0_seq1	2192	2192	-	-	-	-	-	-	798.76	823.94	757.99	1277.58	1043.44	1221.51	8.41	9.82	10.19	16.79	16.26	16.26	793.563	1180.84	9.47333	16.4367	-0.794974	0.794974	0.0031225	0.057597	no
comp18138_c0	comp18138_c0_seq1	1489	1489	Q6NRL0	prolyl-tRNA synthetase	-	-	K01881	ko00970(Aminoacyl-tRNA biosynthesis)	6781.59	6067.54	5804.06	4303.19	3554.81	3939.93	106.92	108.2	116.81	84.66	82.89	78.48	6217.73	3932.64	110.643	82.01	0.432045	0.432045	0.00311696	0.057597	no
comp16290_c0	comp16290_c0_seq1	355	355	-	-	-	-	-	-	76.01	67	43	109.01	89.44	93	6.03	6.02	4.36	10.8	10.5	9.33	62.0033	97.15	5.47	10.21	-0.90037	0.90037	0.00310186	0.057597	no
comp16645_c0	comp16645_c0_seq1,comp16645_c0_seq10,comp16645_c0_seq11,comp16645_c0_seq12,comp16645_c0_seq13,comp16645_c0_seq14,comp16645_c0_seq15,comp16645_c0_seq16,comp16645_c0_seq17,comp16645_c0_seq18,comp16645_c0_seq19,comp16645_c0_seq2,comp16645_c0_seq20,comp16645_	5543	1742.38	-	-	-	-	-	-	4731.34	4064.18	2580.36	7221.18	5547.46	5955.52	65.95	61.69	46.75	121.8	116.59	100.85	3791.96	6241.39	58.13	113.08	-0.959989	0.959989	0.00311203	0.057597	no
comp4733_c0	comp4733_c0_seq1,comp4733_c0_seq2	2959	2602.57	Q8LJT8	-	GO:0005634(nucleus);GO:0003677(DNA binding);GO:0005515(protein binding);GO:0006355(regulation of transcription, DNA-dependent);GO:0006351(transcription, DNA-dependent)	[K] Transcription	-	-	1238.21	1107.86	970.9	1532.72	1399.42	1585.99	11.01	11.63	11.08	16.25	17.92	17.59	1105.66	1506.04	11.24	17.2533	-0.618233	0.618233	0.00310865	0.057597	no
comp21342_c0	comp21342_c0_seq1	3637	3637	-	guanine nucleotide binding protein (G protein), alpha inhibiting activity polypeptide	-	[D] Cell cycle control, cell division, chromosome partitioning ;[T] Signal transduction mechanisms	K04630	ko04062(Chemokine signaling pathway);ko04360(Axon guidance);ko04530(Tight junction);ko04540(Gap junction);ko04670(Leukocyte transendothelial migration);ko04730(Long-term depression);ko04914(Progesterone-mediated oocyte maturation);ko04916(Melanogenesis);k	2061.99	1593.18	1539.94	2739.54	2636.33	3123.99	12.91	11.28	12.31	21.4	24.41	24.71	1731.7	2833.29	12.1667	23.5067	-0.950136	0.950136	0.0031053	0.057597	no
comp5630_c0	comp5630_c0_seq1	1516	1516	Q7ZVZ7	-	GO:0016787(hydrolase activity)	[R] General function prediction only	K06889	-	2322.01	2170.78	1808.83	1552.02	1277.96	1467.95	35.92	37.99	35.72	29.96	29.24	28.69	2100.54	1432.64	36.5433	29.2967	0.318872	0.318872	0.00312964	0.0576265	no
comp16202_c0	comp16202_c0_seq1,comp16202_c0_seq2,comp16202_c0_seq3	828	802.02	Q17684	DNA-directed RNA Polymerase II subunit F	GO:0005634(nucleus);GO:0030880(RNA polymerase complex);GO:0003677(DNA binding);GO:0003899(DNA-directed RNA polymerase activity);GO:0009792(embryo development ending in birth or egg hatching);GO:0006898(receptor-mediated endocytosis);GO:0000003(reproductio	[K] Transcription	K03014	ko00230(Purine metabolism);ko00240(Pyrimidine metabolism);ko03020(RNA polymerase);ko05016(Huntington's disease)	9783.1	7410.09	7604.64	3357.18	3884.16	4244.16	300.68	256.21	297.04	128.12	175.75	164.22	8265.94	3828.5	284.643	156.03	0.867332	0.867332	0.00313464	0.0576389	no
comp23071_c0	comp23071_c0_seq1	1038	1038	Q42563	adenine phosphoribosyltransferase	GO:0005737(cytoplasm);GO:0005886(plasma membrane);GO:0003999(adenine phosphoribosyltransferase activity);GO:0006168(adenine salvage);GO:0006166(purine ribonucleoside salvage)	[F] Nucleotide transport and metabolism	K00759	ko00230(Purine metabolism)	668.49	677.06	588.63	348.18	267.84	354.09	15.47	17.72	17.39	10.05	9.17	10.35	644.727	323.37	16.86	9.85667	0.774433	0.774433	0.00315273	0.0578248	no
comp18271_c0	comp18271_c0_seq1	1942	1942	P46644	aspartate aminotransferase	GO:0009507(chloroplast);GO:0016020(membrane);GO:0005777(peroxisome);GO:0004069(L-aspartate:2-oxoglutarate aminotransferase activity);GO:0030170(pyridoxal phosphate binding);GO:0006103(2-oxoglutarate metabolic process);GO:0006531(aspartate metabolic proces	[E] Amino acid transport and metabolism	K00813	ko00250(Alanine, aspartate and glutamate metabolism);ko00270(Cysteine and methionine metabolism);ko00330(Arginine and proline metabolism);ko00350(Tyrosine metabolism);ko00360(Phenylalanine metabolism);ko00400(Phenylalanine, tyrosine and tryptophan biosynt	5498.04	4864.95	4661.14	2109.43	1893.47	2797.88	65.66	65.72	71.06	31.44	33.44	42.22	5008.04	2266.93	67.48	35.7	0.918536	0.918536	0.00316448	0.0579205	no
comp11571_c0	comp11571_c0_seq1,comp11571_c0_seq2	1959	1893.6	P26585	high mobility group protein B1	GO:0005634(nucleus);GO:0003677(DNA binding)	[R] General function prediction only	K10802	ko03410(Base excision repair)	32189.8	25626.7	21331.3	13893.3	12078.8	11562.7	396.88	356.58	334.37	211.99	219.67	179.08	26382.6	12511.6	362.61	203.58	0.832823	0.832823	0.00317383	0.0579205	no
comp41175_c0	comp41175_c0_seq1	1030	1030	-	-	-	-	-	-	255	233	234	102	87	137	5.95	6.15	6.97	2.97	3	4.04	240.667	108.667	6.35667	3.33667	0.929863	0.929863	0.0031712	0.0579205	no
comp17439_c0	comp17439_c0_seq1	1716	1716	Q84VQ1	-	GO:0005524(ATP binding);GO:0005515(protein binding);GO:0005975(carbohydrate metabolic process);GO:0043562(cellular response to nitrogen levels);GO:0006633(fatty acid biosynthetic process);GO:0042128(nitrate assimilation)	[G] Carbohydrate transport and metabolism	-	-	10982.6	10584.7	10038.5	5430.94	4901.64	6365.82	149.22	162.67	174.09	92.07	98.5	109.28	10535.3	5566.13	161.993	99.95	0.696656	0.696656	0.00317308	0.0579205	no
comp9525_c0	comp9525_c0_seq1,comp9525_c0_seq2	3884	3334.16	-	-	-	[D] Cell cycle control, cell division, chromosome partitioning	-	-	1501.3	1494.47	1111.23	1710.21	1574.71	1885.88	10.32	11.62	9.75	14.39	15.88	16.12	1369	1723.6	10.5633	15.4633	-0.549786	0.549786	0.00319152	0.0580107	no
comp18705_c0	comp18705_c0_seq1	1049	1049	Q9FFE0	regulator of ribonuclease activity A	GO:0008428(ribonuclease inhibitor activity);GO:0051252(regulation of RNA metabolic process)	-	K02553	-	5096.43	3982.48	3972.66	2483.89	1876.19	2380.64	116.61	103.07	116.03	70.92	63.49	68.82	4350.52	2246.91	111.903	67.7433	0.724102	0.724102	0.00319109	0.0580107	no
comp15055_c0	comp15055_c0_seq1,comp15055_c0_seq10,comp15055_c0_seq2,comp15055_c0_seq3,comp15055_c0_seq4,comp15055_c0_seq5,comp15055_c0_seq6,comp15055_c0_seq7,comp15055_c0_seq8,comp15055_c0_seq9	1431	928.84	P42748	ubiquitin-conjugating enzyme E2 H	GO:0005524(ATP binding);GO:0004842(ubiquitin-protein ligase activity);GO:0006511(ubiquitin-dependent protein catabolic process)	[O] Posttranslational modification, protein turnover, chaperones	K10576	ko04120(Ubiquitin mediated proteolysis)	5034.91	4248.35	3600.96	3260.69	2586.08	3203.23	133.13	123.91	122.48	96.81	90.8	94.46	4294.74	3016.67	126.507	94.0233	0.428123	0.428123	0.00319382	0.0580107	no
comp10858_c0	comp10858_c0_seq1,comp10858_c0_seq2	3420	2957.04	Q94A43	-	GO:0006355(regulation of transcription, DNA-dependent)	-	-	-	10459.6	7894	7787	12393.9	12258.4	13094.8	81.6	69.47	78.1	117.79	137.49	126.14	8713.55	12582.3	76.39	127.14	-0.734962	0.734962	0.00320486	0.0580674	no
comp24561_c0	comp24561_c0_seq1	1276	1276	Q0WPT7	-	GO:0010287(plastoglobule);GO:0008168(methyltransferase activity);GO:0080167(response to karrikin)	-	-	-	270.98	234.56	223.84	146.98	135.27	169	5.03	4.92	5.3	3.4	3.71	3.96	243.127	150.417	5.08333	3.69	0.462154	0.462154	0.00321627	0.0582082	no
comp9861_c0	comp9861_c0_seq1,comp9861_c0_seq2,comp9861_c0_seq3	1841	1787.76	Q9M1W4	homocysteine S-methyltransferase	GO:0008898(homocysteine S-methyltransferase activity);GO:0046872(metal ion binding);GO:0009086(methionine biosynthetic process);GO:0033528(S-methylmethionine cycle)	[E] Amino acid transport and metabolism	K00547	ko00270(Cysteine and methionine metabolism)	657.73	688.72	528	1115.5	943.18	1100.79	8.4	10.08	8.78	17.8	17.92	17.84	624.817	1053.16	9.08667	17.8533	-0.97437	0.97437	0.0032263	0.0582365	no
comp16545_c0	comp16545_c0_seq1,comp16545_c0_seq2,comp16545_c0_seq3,comp16545_c0_seq4	1676	1380.54	Q8K194	-	GO:0005634(nucleus);GO:0006397(mRNA processing);GO:0008380(RNA splicing)	[R] General function prediction only	-	-	2490.23	1948.31	1950.69	1132.2	1102.11	1323.13	43.76	38.16	43.55	23.6	27.13	28.14	2129.74	1185.81	41.8233	26.29	0.669794	0.669794	0.00322797	0.0582365	no
comp18647_c0	comp18647_c0_seq1	1922	1922	P37830	glucose-6-phosphate 1-dehydrogenase	GO:0005737(cytoplasm);GO:0004345(glucose-6-phosphate dehydrogenase activity);GO:0050661(NADP binding);GO:0006006(glucose metabolic process)	[G] Carbohydrate transport and metabolism	K00036	ko00030(Pentose phosphate pathway);ko00480(Glutathione metabolism)	9247.72	9039.23	7673.67	4454.92	3405.48	5206.45	111.64	123.43	118.25	67.11	60.8	79.41	8653.54	4355.62	117.773	69.1067	0.769116	0.769116	0.00323088	0.0582365	no
comp13496_c0	comp13496_c0_seq1,comp13496_c0_seq2,comp13496_c0_seq3	2868	2683.52	O80977	-	GO:0030665(clathrin coated vesicle membrane);GO:0000139(Golgi membrane);GO:0016021(integral to membrane);GO:0031902(late endosome membrane);GO:0005509(calcium ion binding);GO:0006623(protein targeting to vacuole)	-	-	-	10230.6	9099.61	7633.42	9512.31	8051	9534	86.46	86.94	82.29	100.99	101.1	102.87	8987.88	9032.44	85.23	101.653	-0.254224	0.254224	0.00323643	0.0582365	no
comp6319_c0	comp6319_c0_seq1,comp6319_c0_seq2	1123	1086.37	Q39065	-	GO:0016021(integral to membrane);GO:0005375(copper ion transmembrane transporter activity);GO:0048235(pollen sperm cell differentiation);GO:0048364(root development)	[P] Inorganic ion transport and metabolism	-	-	674.88	555.26	538.2	430.59	373.12	406.01	14.85	13.94	14.95	12.18	12.07	11.29	589.447	403.24	14.58	11.8467	0.29951	0.29951	0.00323631	0.0582365	no
comp482284_c0	comp482284_c0_seq1	387	387	-	-	-	-	-	-	3	3	2	4	4	4	0.21	0.24	0.18	0.36	0.42	0.36	2.66667	4	0.21	0.38	-0.85561	0.85561	0.00323191	0.0582365	no
comp25632_c0	comp25632_c0_seq1	1221	1221	Q5RFG0	enoyl-CoA hydratase	GO:0005739(mitochondrion);GO:0005777(peroxisome);GO:0016853(isomerase activity);GO:0006631(fatty acid metabolic process)	[I] Lipid transport and metabolism	K01692	ko00071(Fatty acid metabolism);ko00280(Valine, leucine and isoleucine degradation);ko00281(Geraniol degradation);ko00281(Geraniol degradation);ko00310(Lysine degradation);ko00380(Tryptophan metabolism);ko00410(beta-Alanine metabolism);ko00632(Benzoate deg	373	325	328.46	169.29	128.12	163.8	7.25	7.15	8.15	4.11	3.69	4.03	342.153	153.737	7.51667	3.94333	0.930677	0.930677	0.00324133	0.0582397	no
comp7736_c1	comp7736_c1_seq1	502	502	O80366	-	GO:0005634(nucleus);GO:0005515(protein binding);GO:0000156(two-component response regulator activity);GO:0007623(circadian rhythm);GO:0009736(cytokinin mediated signaling pathway);GO:0006355(regulation of transcription, DNA-dependent);GO:0006351(transcrip	[K] Transcription	-	-	392	328.46	325	215	169	209.62	20.43	19.37	21.62	13.98	13.03	13.81	348.487	197.873	20.4733	13.6067	0.589432	0.589432	0.00324097	0.0582397	no
comp20429_c0	comp20429_c0_seq1	1778	1778	Q7TMR0	lysosomal Pro-X carboxypeptidase	GO:0005764(lysosome);GO:0004180(carboxypeptidase activity);GO:0008236(serine-type peptidase activity);GO:0006508(proteolysis)	[O] Posttranslational modification, protein turnover, chaperones ;[R] General function prediction only	K01285	-	2559.35	2476.98	2171.29	1030.55	893.43	1354.03	33.51	36.68	36.29	16.84	17.3	22.4	2402.54	1092.67	35.4933	18.8467	0.913239	0.913239	0.00324712	0.0582431	no
comp19126_c0	comp19126_c0_seq1	2163	2163	Q9ZUU4	nucleolin	GO:0009941(chloroplast envelope);GO:0009570(chloroplast stroma);GO:0009535(chloroplast thylakoid membrane);GO:0030529(ribonucleoprotein complex);GO:0010319(stromule);GO:0000166(nucleotide binding);GO:0008266(poly(U) RNA binding);GO:0045087(innate immune r	[R] General function prediction only	K11294	ko05130(Pathogenic Escherichia coli infection)	3770.68	3232.02	3077.11	1977.12	1653.12	1934.5	40.27	39.04	41.95	26.35	26.11	26.1	3359.94	1854.91	40.42	26.1867	0.626237	0.626237	0.00324975	0.0582431	no
comp20153_c0	comp20153_c0_seq1	851	851	-	-	-	-	-	-	1815.21	1473.14	1441.73	697.67	688.78	923.72	52.12	47.84	52.84	25	29.25	33.51	1576.69	770.057	50.9333	29.2533	0.800009	0.800009	0.00325651	0.0582772	no
comp3920_c0	comp3920_c0_seq1,comp3920_c0_seq2	3339	2551.6	-	-	-	-	-	-	1657.58	1464.99	995.18	2879.41	2452.68	2693.69	21.27	19.08	15.67	31.86	37.14	32.01	1372.58	2675.26	18.6733	33.67	-0.850484	0.850484	0.00328847	0.0584467	no
comp6554_c0	comp6554_c0_seq1,comp6554_c0_seq2	1876	1745.05	-	-	-	-	-	-	509.05	407.85	327	729.33	520.98	661.94	6.76	6.17	5.63	12.37	10.47	11.08	414.633	637.417	6.18667	11.3067	-0.869939	0.869939	0.00327374	0.0584467	no
comp7567_c0	comp7567_c0_seq1,comp7567_c0_seq2	3313	3218.83	Q9ZWJ9	pseudo-response regulator 9	GO:0005634(nucleus);GO:0003677(DNA binding);GO:0005515(protein binding);GO:0003700(sequence-specific DNA binding transcription factor activity);GO:0000156(two-component response regulator activity);GO:0009736(cytokinin mediated signaling pathway);GO:00098	[K] Transcription	K12128	ko04712(Circadian rhythm - plant)	4520.97	4131.8	3105.62	5294.21	4329.72	4663.54	32.15	33.17	28.18	46.81	45.3	41.72	3919.46	4762.49	31.1667	44.61	-0.517363	0.517363	0.00329997	0.0584467	no
comp4620_c0	comp4620_c0_seq1,comp4620_c0_seq2	1955	1859.26	Q5BJZ6	-	-	[G] Carbohydrate transport and metabolism	-	-	879.7	842.52	830.97	1029.34	1011.07	1103.03	10.87	12.29	13.21	17.73	20.1	17.94	851.063	1047.81	12.1233	18.59	-0.61674	0.61674	0.00327287	0.0584467	no
comp20741_c0	comp20741_c0_seq1	2188	2188	-	-	-	-	-	-	1647.19	1354.05	1291.16	1861.01	1742.59	1863.67	17.38	16.16	17.39	24.51	27.2	24.85	1430.8	1822.42	16.9767	25.52	-0.588075	0.588075	0.00327693	0.0584467	no
comp21371_c0	comp21371_c0_seq1	2617	2617	Q94F30	sentrin-specific protease 1	GO:0031965(nuclear membrane);GO:0016929(SUMO-specific protease activity);GO:0009911(positive regulation of flower development);GO:0016926(protein desumoylation);GO:0006508(proteolysis)	[O] Posttranslational modification, protein turnover, chaperones	K08592	-	1125.1	1100.79	821.98	1459.15	1414	1681.37	9.87	10.92	9.2	15.97	18.35	18.64	1015.96	1518.17	9.99667	17.6533	-0.820422	0.820422	0.00330027	0.0584467	no
comp18632_c0	comp18632_c0_seq1	2346	2346	Q54ZR7	fused signal recognition particle receptor	GO:0005785(signal recognition particle receptor complex);GO:0005525(GTP binding);GO:0003924(GTPase activity);GO:0004872(receptor activity);GO:0005047(signal recognition particle binding);GO:0006614(SRP-dependent cotranslational protein targeting to membra	[U] Intracellular trafficking, secretion, and vesicular transport	K03110	ko03060(Protein export);ko03070(Bacterial secretion system)	4421.98	3645.13	3007.94	5481.36	4020.61	5194.94	43.42	40.48	37.7	67.16	58.39	64.45	3691.68	4898.97	40.5333	63.3333	-0.643856	0.643856	0.00328223	0.0584467	no
comp15537_c0	comp15537_c0_seq1,comp15537_c0_seq10,comp15537_c0_seq11,comp15537_c0_seq12,comp15537_c0_seq2,comp15537_c0_seq3,comp15537_c0_seq4,comp15537_c0_seq5,comp15537_c0_seq6,comp15537_c0_seq7,comp15537_c0_seq8,comp15537_c0_seq9	6033	5616.66	O82363	-	GO:0005739(mitochondrion);GO:0005488(binding)	-	-	-	803.01	775	650.87	1497.93	1260.09	1307.04	3.67	3.65	3.9	7.46	7.7	6.79	742.96	1355.02	3.74	7.31667	-0.968148	0.968148	0.00331159	0.0584942	no
comp20003_c0	comp20003_c0_seq1	1742	1742	Q56Y85	methionyl aminopeptidase	GO:0005737(cytoplasm);GO:0004177(aminopeptidase activity);GO:0046872(metal ion binding);GO:0008235(metalloexopeptidase activity);GO:0009987(cellular process);GO:0016485(protein processing);GO:0006508(proteolysis)	[R] General function prediction only	K01265	-	2993.7	2997.5	2681.7	1400.05	1455	1734.84	40.04	45.35	45.78	23.37	28.78	29.32	2890.97	1529.96	43.7233	27.1567	0.687097	0.687097	0.0033419	0.0585419	no
comp18079_c0	comp18079_c0_seq1	2164	2164	O48651	squalene monooxygenase	GO:0016021(integral to membrane);GO:0050660(flavin adenine dinucleotide binding);GO:0004506(squalene monooxygenase activity)	[I] Lipid transport and metabolism	K00511	ko00100(Steroid biosynthesis)	11427.9	8837.43	8965.62	5735.31	4981.21	4922.12	121.98	106.7	122.16	76.39	78.64	66.38	9743.66	5212.88	116.947	73.8033	0.664093	0.664093	0.00333467	0.0585419	no
comp13274_c2	comp13274_c2_seq1	1708	1708	Q06190	protein phosphatase 2 (formerly 2A), regulatory subunit B''	GO:0000159(protein phosphatase type 2A complex);GO:0005509(calcium ion binding);GO:0005515(protein binding);GO:0008601(protein phosphatase type 2A regulator activity);GO:0006470(protein dephosphorylation)	[A] RNA processing and modification	K11583	-	631.48	681.34	467.42	930.1	829.46	895.98	8.62	10.52	8.15	15.85	16.75	15.46	593.413	885.18	9.09667	16.02	-0.816464	0.816464	0.00333726	0.0585419	no
comp56301_c0	comp56301_c0_seq1	330	330	-	-	-	-	-	-	36	36	23	53	47.02	46.13	3.14	3.55	2.56	5.76	6.06	5.08	31.6667	48.7167	3.08333	5.63333	-0.869498	0.869498	0.00334449	0.0585419	no
comp11253_c0	comp11253_c0_seq1,comp11253_c0_seq2,comp11253_c0_seq3	2179	2092.7	P54243	glucose-6-phosphate isomerase	GO:0005737(cytoplasm);GO:0004347(glucose-6-phosphate isomerase activity);GO:0006094(gluconeogenesis);GO:0006096(glycolysis)	[G] Carbohydrate transport and metabolism	K01810	ko00010(Glycolysis / Gluconeogenesis);ko00030(Pentose phosphate pathway);ko00500(Starch and sucrose metabolism);ko00520(Amino sugar and nucleotide sugar metabolism)	1505.15	1622.02	1134.21	1929.37	1857.18	2145.26	16.71	20.38	16.08	26.71	30.38	30	1420.46	1977.27	17.7233	29.03	-0.711895	0.711895	0.00333337	0.0585419	no
comp12835_c0	comp12835_c0_seq1,comp12835_c0_seq2,comp12835_c0_seq3,comp12835_c0_seq4,comp12835_c0_seq5,comp12835_c0_seq6	1678	1594.43	Q68CM3	jasmonate O-methyltransferase	GO:0008168(methyltransferase activity);GO:0009820(alkaloid metabolic process)	-	K08241	ko00592(alpha-Linolenic acid metabolism)	549.25	408.4	451.19	688.41	510.41	672.39	7.97	6.81	8.38	12.53	10.99	12.36	469.613	623.737	7.72	11.96	-0.631545	0.631545	0.00333503	0.0585419	no
comp3558_c0	comp3558_c0_seq1,comp3558_c0_seq2	3151	3109.88	Q9C660	-	GO:0016021(integral to membrane);GO:0005886(plasma membrane);GO:0005524(ATP binding);GO:0004674(protein serine/threonine kinase activity)	[A] RNA processing and modification	-	-	430.26	301.61	368.87	578.95	532.06	554.22	3.18	2.53	3.46	5.31	5.77	5.12	366.913	555.077	3.05667	5.4	-0.821	0.821	0.00332632	0.0585419	no
comp21838_c0	comp21838_c0_seq1	1512	1512	-	-	-	-	-	-	2534.04	2297.42	2094.79	1867.41	1509.81	1764.98	39.31	40.32	41.48	36.15	34.64	34.6	2308.75	1714.07	40.37	35.13	0.20058	0.20058	0.00335304	0.0585422	no
comp20237_c0	comp20237_c0_seq1	1203	1203	-	-	-	[R] General function prediction only	-	-	1686.31	1439.03	1136.25	668.02	622.99	757.02	33.32	32.16	28.66	16.47	18.21	18.9	1420.53	682.677	31.38	17.86	0.813113	0.813113	0.00335135	0.0585422	no
comp17950_c0	comp17950_c0_seq1	2612	2612	B9DHT4	BTB/POZ domain-containing protein 11	GO:0005634(nucleus);GO:0005886(plasma membrane);GO:0005515(protein binding);GO:0010187(negative regulation of seed germination);GO:0009737(response to abscisic acid stimulus);GO:0009651(response to salt stress)	[S] Function unknown	K10483	-	9788.14	9255.42	7909.94	9247.28	8135.21	9709.64	86.04	92.02	88.75	101.43	105.76	107.84	8984.5	9030.71	88.9367	105.01	-0.239676	0.239676	0.00337091	0.0587687	no
comp16979_c0	comp16979_c0_seq1	847	847	Q2PS27	-	GO:0005737(cytoplasm)	[D] Cell cycle control, cell division, chromosome partitioning ;[Z] Cytoskeleton	-	-	245200	205435	214079	105181	106256	113461	7076.61	6706.29	7886.52	3787.79	4535.47	4137.33	221571	108299	7223.14	4153.53	0.798288	0.798288	0.00337924	0.0588235	no
comp21541_c0	comp21541_c0_seq1	1551	1551	Q42965	nitrilase	GO:0005886(plasma membrane);GO:0047427(cyanoalanine nitrilase activity);GO:0006807(nitrogen compound metabolic process)	[E] Amino acid transport and metabolism	K01501	ko00380(Tryptophan metabolism);ko00460(Cyanoamino acid metabolism);ko00632(Benzoate degradation via CoA ligation);ko00643(Styrene degradation);ko00910(Nitrogen metabolism)	1610.36	1391.1	1375.15	819.17	592.57	901	24.32	23.77	26.51	15.44	13.24	17.19	1458.87	770.913	24.8667	15.29	0.701625	0.701625	0.00339752	0.0589048	no
comp11377_c1	comp11377_c1_seq1	605	605	P93830	-	GO:0005634(nucleus);GO:0046983(protein dimerization activity);GO:0009734(auxin mediated signaling pathway);GO:0006355(regulation of transcription, DNA-dependent);GO:0006351(transcription, DNA-dependent)	-	-	-	1584.75	1372.15	1046.24	570.2	568.59	691.69	66.58	65.21	56.11	29.89	35.33	36.72	1334.38	610.16	62.6333	33.98	0.882245	0.882245	0.00338983	0.0589048	no
comp24414_c0	comp24414_c0_seq1	1488	1488	Q54DD7	-	GO:0016021(integral to membrane)	[S] Function unknown	-	-	668.68	735.11	605	968.5	886.34	1139.14	10.55	13.12	12.18	19.07	20.68	22.71	669.597	997.993	11.95	20.82	-0.800959	0.800959	0.00339587	0.0589048	no
comp61911_c0	comp61911_c0_seq1	778	778	-	-	-	-	-	-	76.06	78.75	68.01	33.94	38.06	37.1	2.41	2.82	2.75	1.34	1.78	1.49	74.2733	36.3667	2.66	1.53667	0.791622	0.791622	0.00342378	0.059107	no
comp11066_c0	comp11066_c0_seq1,comp11066_c0_seq2	3202	3093.48	-	-	-	[A] RNA processing and modification ;[R] General function prediction only	-	-	3784.11	2806.87	2863.18	4357.6	4058.89	5005.13	28.07	23.64	27.25	39.47	43.99	46.25	3151.39	4473.87	26.32	43.2367	-0.716096	0.716096	0.00342637	0.0591128	no
comp16445_c0	comp16445_c0_seq1,comp16445_c0_seq10,comp16445_c0_seq11,comp16445_c0_seq2,comp16445_c0_seq3,comp16445_c0_seq4,comp16445_c0_seq5,comp16445_c0_seq6,comp16445_c0_seq7,comp16445_c0_seq8,comp16445_c0_seq9	5499	3685.4	Q9SYI0	preprotein translocase subunit SecA	GO:0009941(chloroplast envelope);GO:0009570(chloroplast stroma);GO:0009535(chloroplast thylakoid membrane);GO:0005524(ATP binding);GO:0009658(chloroplast organization);GO:0017038(protein import);GO:0006605(protein targeting);GO:0010109(regulation of photo	-	K03070	ko03060(Protein export);ko03070(Bacterial secretion system)	1943.22	2023.88	1564	4210.37	3967.66	3927.29	17.87	21.71	15.08	33.72	36.97	31.87	1843.7	4035.11	18.22	34.1867	-0.907911	0.907911	0.00342903	0.0591133	no
comp10467_c0	comp10467_c0_seq1,comp10467_c0_seq2,comp10467_c0_seq3	1944	1822.6	F6QV99	adenosinetriphosphatase	-	[O] Posttranslational modification, protein turnover, chaperones	K01509	ko00230(Purine metabolism)	1989.46	1742.9	1478.43	2697.79	2337.62	3039.9	26.17	26.18	24.19	44.3	45.35	50.19	1736.93	2691.77	25.5133	46.6133	-0.869491	0.869491	0.00344126	0.0591133	no
comp2355_c0	comp2355_c0_seq1,comp2355_c0_seq2	1563	1324.15	Q9D1M0	-	GO:0005789(endoplasmic reticulum membrane);GO:0012507(ER to Golgi transport vesicle membrane);GO:0031080(Nup107-160 complex);GO:0051028(mRNA transport);GO:0015031(protein transport);GO:0055085(transmembrane transport)	[U] Intracellular trafficking, secretion, and vesicular transport	-	-	575	504.01	470.99	260.24	199.18	305	10.29	10.16	10.84	5.7	5.33	6.81	516.667	254.807	10.43	5.94667	0.810586	0.810586	0.00345563	0.059132	no
comp15069_c0	comp15069_c0_seq1,comp15069_c0_seq10,comp15069_c0_seq11,comp15069_c0_seq12,comp15069_c0_seq13,comp15069_c0_seq14,comp15069_c0_seq15,comp15069_c0_seq16,comp15069_c0_seq2,comp15069_c0_seq3,comp15069_c0_seq4,comp15069_c0_seq5,comp15069_c0_seq6,comp15069_c0_s	3272	2714.6	F4HVJ3	-	-	[S] Function unknown	-	-	622	693	408.94	931.02	930.96	1041.05	5.36	6.63	4.44	9.72	11.48	11.04	574.647	967.677	5.47667	10.7467	-0.972519	0.972519	0.00345649	0.059132	no
comp18268_c0	comp18268_c0_seq1	2436	2436	P51137	-	GO:0005524(ATP binding);GO:0004674(protein serine/threonine kinase activity)	[G] Carbohydrate transport and metabolism	K00924	-	9236.29	9428.24	7277.31	4351.65	3380.94	4672.6	87.24	100.73	87.74	51.29	47.23	55.76	8647.28	4135.06	91.9033	51.4267	0.837601	0.837601	0.00346205	0.0591965	no
comp17330_c0	comp17330_c0_seq1	832	832	-	-	-	[S] Function unknown	-	-	7015.25	6479.3	6254.63	2432.94	2453.08	3584.38	206.47	215.7	234.98	89.35	106.78	133.29	6583.06	2823.47	219.05	109.807	0.996295	0.996295	0.00346839	0.0591994	no
comp27837_c0	comp27837_c0_seq1	2839	2839	-	-	-	-	-	-	492.87	577.18	349.87	775.1	772	821.83	3.98	5.27	3.6	7.8	9.21	8.38	473.307	789.643	4.28333	8.46333	-0.982492	0.982492	0.00347865	0.0592881	no
comp12889_c0	comp12889_c0_seq1,comp12889_c0_seq2	2275	2024.27	Q8LF97	S-phase kinase-associated protein 1	GO:0005634(nucleus);GO:0006511(ubiquitin-dependent protein catabolic process)	[O] Posttranslational modification, protein turnover, chaperones	K03094	ko04110(Cell cycle);ko04111(Cell cycle - yeast);ko04114(Oocyte meiosis);ko04120(Ubiquitin mediated proteolysis);ko04310(Wnt signaling pathway);ko04350(TGF-beta signaling pathway)	1219.88	948.48	683.63	1534.1	1442.25	1568.72	14.08	12.21	9.99	21.79	24.05	22.36	950.663	1515.02	12.0933	22.7333	-0.910597	0.910597	0.00350863	0.0594605	no
comp7621_c0	comp7621_c0_seq1,comp7621_c0_seq2	1490	1420.18	Q9ZPQ3	hypothetical protein	GO:0005829(cytosol);GO:0005634(nucleus);GO:0051499(D-aminoacyl-tRNA deacylase activity);GO:0046872(metal ion binding);GO:0009636(response to toxin)	-	K09716	-	445.55	339.37	340	487.83	442.67	557.6	7.33	6.3	7.18	9.9	10.71	11.46	374.973	496.033	6.93667	10.69	-0.623947	0.623947	0.0035214	0.0595326	no
comp18402_c0	comp18402_c0_seq1	2014	2014	-	-	-	-	-	-	9841.52	8787.95	7306.2	5534.23	4191.71	5787.78	113.17	114.31	107.25	79.41	71.29	84.09	8645.22	5171.24	111.577	78.2633	0.511627	0.511627	0.0035229	0.0595369	no
comp16486_c0	comp16486_c0_seq1,comp16486_c0_seq10,comp16486_c0_seq11,comp16486_c0_seq12,comp16486_c0_seq13,comp16486_c0_seq2,comp16486_c0_seq3,comp16486_c0_seq4,comp16486_c0_seq5,comp16486_c0_seq6,comp16486_c0_seq7,comp16486_c0_seq8,comp16486_c0_seq9	873	409.67	-	-	-	-	-	-	203.8	227.43	203.58	318.15	280.76	294.69	13.79	17.44	17.19	25.26	27.6	24.84	211.603	297.867	16.14	25.9	-0.682312	0.682312	0.00353347	0.0596526	no
comp14001_c0	comp14001_c0_seq1,comp14001_c0_seq2,comp14001_c0_seq3,comp14001_c0_seq4,comp14001_c0_seq5,comp14001_c0_seq6,comp14001_c0_seq7,comp14001_c0_seq8	3789	3008.26	P80227	acylaminoacyl-peptidase	GO:0005737(cytoplasm);GO:0004252(serine-type endopeptidase activity);GO:0006508(proteolysis)	[O] Posttranslational modification, protein turnover, chaperones	K01303	-	1651.66	1619.52	1452.75	2627.06	1984.85	2270.8	12.67	14.07	14.11	24.85	22.08	21.87	1574.64	2294.24	13.6167	22.9333	-0.752072	0.752072	0.00355106	0.0597489	no
comp21288_c0	comp21288_c0_seq1	463	463	-	-	-	-	-	-	1106.04	1136.28	998.23	522.08	561.86	579.3	63.43	73.71	73.08	37.36	47.66	41.98	1080.18	554.413	70.0733	42.3333	0.727071	0.727071	0.00355539	0.0597489	no
comp18399_c0	comp18399_c0_seq1	1642	1642	O81062	minor histocompatibility antigen H13	-	[S] Function unknown	K09595	-	5762.02	5242.49	5109.21	3538.16	2481.23	2834.76	81.98	84.37	92.79	62.81	52.21	50.96	5371.24	2951.38	86.38	55.3267	0.642722	0.642722	0.00360135	0.0601638	no
comp20080_c0	comp20080_c0_seq1	1298	1298	Q94C60	-	GO:0005634(nucleus);GO:0008270(zinc ion binding);GO:0032786(positive regulation of transcription elongation, DNA-dependent);GO:0006351(transcription, DNA-dependent)	[K] Transcription	-	-	2267.12	1817.06	1918.94	980.95	1022.43	978	41.32	37.46	44.64	22.31	27.56	22.52	2001.04	993.793	41.14	24.13	0.769714	0.769714	0.00360493	0.0601816	no
comp30860_c0	comp30860_c0_seq1	1068	1068	-	-	-	-	-	-	420	410	338.28	267.02	188.93	249.01	9.43	10.41	9.69	7.48	6.27	7.06	389.427	234.987	9.84333	6.93667	0.504904	0.504904	0.00361061	0.060211	no
comp16489_c0	comp16489_c0_seq1,comp16489_c0_seq2,comp16489_c0_seq3,comp16489_c0_seq4,comp16489_c0_seq5,comp16489_c0_seq6	1695	1403.35	Q7XKV4	beta-glucosidase	GO:0033907(beta-D-fucosidase activity);GO:0004565(beta-galactosidase activity);GO:0080083(beta-gentiobiose beta-glucosidase activity);GO:0047701(beta-L-arabinosidase activity);GO:0043169(cation binding);GO:0004338(glucan exo-1,3-beta-glucosidase activity)	[G] Carbohydrate transport and metabolism	K05350	ko00460(Cyanoamino acid metabolism);ko00500(Starch and sucrose metabolism);ko00940(Phenylpropanoid biosynthesis)	1557.77	1368.7	1691.12	2581.8	2445.81	2854.67	25.44	26.28	34.69	50.46	56.56	55.33	1539.2	2627.43	28.8033	54.1167	-0.909837	0.909837	0.00360887	0.060211	no
comp19022_c0	comp19022_c0_seq1	1026	1026	-	ferredoxin	-	-	K02639	ko00195(Photosynthesis)	1393.34	1294.74	1167.99	583.27	637.13	667.92	32.65	34.32	34.94	17.06	22.08	19.78	1285.36	629.44	33.97	19.64	0.790466	0.790466	0.00362514	0.0603139	no
comp60836_c0	comp60836_c0_seq1	2638	2638	A5JTQ2	beta-glucosidase	GO:0005578(proteinaceous extracellular matrix);GO:0046556(alpha-N-arabinofuranosidase activity);GO:0009044(xylan 1,4-beta-xylosidase activity);GO:0045493(xylan catabolic process)	-	K01188	ko00460(Cyanoamino acid metabolism);ko00500(Starch and sucrose metabolism);ko00940(Phenylpropanoid biosynthesis)	168.98	170	157.96	216.99	206.03	213	1.47	1.67	1.75	2.36	2.65	2.34	165.647	212.007	1.63	2.45	-0.58791	0.58791	0.00363052	0.0603415	no
comp11288_c1	comp11288_c1_seq1,comp11288_c1_seq2,comp11288_c1_seq3,comp11288_c1_seq4	1856	1824.48	B8HLD2	molecular chaperone DnaJ	GO:0005737(cytoplasm);GO:0005524(ATP binding);GO:0031072(heat shock protein binding);GO:0046872(metal ion binding);GO:0051082(unfolded protein binding);GO:0006260(DNA replication);GO:0006457(protein folding);GO:0009408(response to heat)	[O] Posttranslational modification, protein turnover, chaperones	K03686	-	1868.84	1693.86	1603.3	2168.48	2108.1	2317.59	24.05	24.57	26.79	34.74	39.55	37.46	1722	2198.06	25.1367	37.25	-0.567447	0.567447	0.00363993	0.060367	no
comp16404_c0	comp16404_c0_seq1,comp16404_c0_seq2,comp16404_c0_seq3,comp16404_c0_seq4	1423	1112.31	-	-	-	-	-	-	73.33	93.09	71.96	179.05	120	155.88	1.67	2.26	2.21	4.21	3.46	3.82	79.46	151.643	2.04667	3.83	-0.904068	0.904068	0.00364343	0.0603833	no
comp8098_c0	comp8098_c0_seq1	680	680	Q0WVN5	cellulose synthase A	GO:0000139(Golgi membrane);GO:0016021(integral to membrane);GO:0016760(cellulose synthase (UDP-forming) activity);GO:0007047(cellular cell wall organization);GO:0030244(cellulose biosynthetic process)	-	K10999	-	297	280	274.24	146.85	107.64	129.94	10.93	11.66	12.89	6.75	5.86	6.04	283.747	128.143	11.8267	6.21667	0.92783	0.92783	0.00365027	0.0604464	no
comp17825_c0	comp17825_c0_seq1	1330	1330	P55852	small ubiquitin-related modifier	GO:0005829(cytosol);GO:0005634(nucleus);GO:0005515(protein binding);GO:0031386(protein tag);GO:0010286(heat acclimation);GO:0043433(negative regulation of sequence-specific DNA binding transcription factor activity);GO:0016925(protein sumoylation)	[O] Posttranslational modification, protein turnover, chaperones	K12160	-	11919.8	10281.1	10973.1	4353.14	4304.58	5857.83	211.72	206.56	248.79	96.48	113.08	131.46	11058	4838.52	222.357	113.673	0.967982	0.967982	0.0036515	0.0604464	no
comp12198_c0	comp12198_c0_seq1	2675	2675	-	-	-	-	-	-	1941.85	1502.44	1334.22	832.38	626.89	829.99	16.66	14.58	14.61	8.91	7.95	8.99	1592.84	763.087	15.2833	8.61667	0.826757	0.826757	0.0036585	0.0604867	no
comp19268_c0	comp19268_c0_seq1	458	458	Q9LW64	-	-	[S] Function unknown	-	-	1672.32	1742.76	1479.77	787.78	798.13	898.71	97.16	114.52	109.74	57.11	68.58	65.97	1631.62	828.207	107.14	63.8867	0.74591	0.74591	0.0036722	0.0605466	no
comp23623_c0	comp23623_c0_seq1	952	952	-	-	-	-	-	-	962.1	849.17	728.35	544.77	412.08	461.08	24.45	24.41	23.62	17.27	15.49	14.8	846.54	472.643	24.16	15.8533	0.607834	0.607834	0.00367416	0.060558	no
comp15927_c0	comp15927_c0_seq1,comp15927_c0_seq10,comp15927_c0_seq11,comp15927_c0_seq12,comp15927_c0_seq13,comp15927_c0_seq14,comp15927_c0_seq15,comp15927_c0_seq16,comp15927_c0_seq17,comp15927_c0_seq18,comp15927_c0_seq19,comp15927_c0_seq2,comp15927_c0_seq20,comp15927_	1941	1724.06	-	hypothetical protein	-	-	K07276	-	380.76	386.95	387.49	653.91	508	548	5.27	5.89	6.78	11	10.2	9.24	385.067	569.97	5.98	10.1467	-0.762788	0.762788	0.00368588	0.0606679	no
comp9016_c0	comp9016_c0_seq1	1116	1116	-	-	-	-	-	-	56.37	53	49.02	29.12	30	30	1.21	1.28	1.34	0.78	0.95	0.81	52.7967	29.7067	1.27667	0.846667	0.592516	0.592516	0.00369334	0.0607697	no
comp15190_c0	comp15190_c0_seq1,comp15190_c0_seq2,comp15190_c0_seq3,comp15190_c0_seq4,comp15190_c0_seq5,comp15190_c0_seq6	3440	3011.5	Q9FKG6	interleukin-1 receptor-associated kinase 4	GO:0000151(ubiquitin ligase complex);GO:0005524(ATP binding);GO:0004674(protein serine/threonine kinase activity);GO:0004842(ubiquitin-protein ligase activity)	[T] Signal transduction mechanisms	K04733	ko04210(Apoptosis);ko04620(Toll-like receptor signaling pathway);ko04722(Neurotrophin signaling pathway);ko05140(Leishmaniasis);ko05142(Chagas disease)	1001.88	958.63	623.45	1311.23	1359.97	1469.44	7.73	8.33	6.09	12.38	15.1	14.09	861.32	1380.21	7.38333	13.8567	-0.908236	0.908236	0.00370199	0.0608495	no
comp17728_c0	comp17728_c0_seq1	2998	2998	Q9ZVD0	-	GO:0009507(chloroplast);GO:0005829(cytosol);GO:0010445(nuclear dicing body);GO:0016607(nuclear speck);GO:0005730(nucleolus);GO:0005515(protein binding);GO:0008270(zinc ion binding);GO:0016568(chromatin modification);GO:0006397(mRNA processing);GO:0031053(	[R] General function prediction only	-	-	5296.63	3810.69	4612.72	6592.92	6353.89	7199.53	40.41	32.89	44.92	62.77	71.7	69.4	4573.35	6715.45	39.4067	67.9567	-0.786175	0.786175	0.0037016	0.0608495	no
comp84050_c0	comp84050_c0_seq1	636	636	-	-	-	-	-	-	46.64	31	36	67.02	55	54.97	1.85	1.39	1.82	3.32	3.23	2.76	37.88	58.9967	1.68667	3.10333	-0.879644	0.879644	0.00372139	0.0610082	no
comp23076_c0	comp23076_c0_seq1	2505	2505	Q9M358	-	-	[S] Function unknown	-	-	1209.04	1049.16	732.83	1441.82	1320.11	1381	11.1	10.89	8.58	16.51	17.92	16.01	997.01	1380.98	10.19	16.8133	-0.722452	0.722452	0.00372847	0.0610082	no
comp10465_c0	comp10465_c0_seq1,comp10465_c0_seq2,comp10465_c0_seq3,comp10465_c0_seq4	2518	1846.57	-	-	-	-	-	-	1213.59	1047.12	991.67	1551.79	1459.68	1617.33	15.4	15.04	15.99	24.06	26.98	25.44	1084.13	1542.93	15.4767	25.4933	-0.720025	0.720025	0.00372802	0.0610082	no
comp11820_c0	comp11820_c0_seq1	1475	1475	P51074	glycerophosphoinositol inositolphosphodiesterase	GO:0005509(calcium ion binding);GO:0005544(calcium-dependent phospholipid binding)	[U] Intracellular trafficking, secretion, and vesicular transport	K01124	-	18664.8	19192.9	14219.2	7077.48	7300.29	9427.4	297.21	345.69	289.02	140.63	171.93	189.67	17358.9	7935.06	310.64	167.41	0.891858	0.891858	0.00374856	0.0611753	no
comp11132_c0	comp11132_c0_seq1	1674	1674	Q9LW64	-	-	[S] Function unknown	-	-	3389.78	3010.22	2931.26	1284.12	1417.94	1734.04	47.26	47.48	52.17	22.34	29.24	30.55	3110.42	1478.7	48.97	27.3767	0.838951	0.838951	0.00374857	0.0611753	no
comp19932_c0	comp19932_c0_seq1	1044	1044	O94903	-	GO:0030170(pyridoxal phosphate binding)	[R] General function prediction only	K06997	-	2516.97	2116.26	1750.96	1242.58	1147.78	1293.94	57.89	55.05	51.4	35.66	39.04	37.6	2128.06	1228.1	54.78	37.4333	0.549326	0.549326	0.0037525	0.0611978	no
comp5168_c0	comp5168_c0_seq1	1412	1412	Q9LVM5	allantoicase	GO:0005829(cytosol);GO:0031234(extrinsic to internal side of plasma membrane);GO:0005777(peroxisome);GO:0051997(2-oxo-4-hydroxy-4-carboxy-5-ureidoimidazoline decarboxylase activity);GO:0033971(hydroxyisourate hydrolase activity);GO:0005515(protein binding	[I] Lipid transport and metabolism	K01477	ko00230(Purine metabolism)	2494.12	2612.38	2257.22	1228.49	1062.02	1049.13	41.59	49.27	48.04	25.56	26.19	22.1	2454.57	1113.21	46.3	24.6167	0.911377	0.911377	0.00377434	0.0612704	no
comp10027_c0	comp10027_c0_seq1,comp10027_c0_seq2,comp10027_c0_seq3	1962	1796.74	Q3UGP8	alpha-1,2-glucosyltransferase	GO:0016021(integral to membrane);GO:0005886(plasma membrane);GO:0016758(transferase activity, transferring hexosyl groups)	[O] Posttranslational modification, protein turnover, chaperones ;[K] Transcription ;[I] Lipid transport and metabolism ;[T] Signal transduction mechanisms	K03850	ko00510(N-Glycan biosynthesis)	327	274.11	240.28	451.9	351	390.7	5.03	4.48	3.85	7.73	7.13	6.99	280.463	397.867	4.45333	7.28333	-0.709713	0.709713	0.00377508	0.0612704	no
comp20703_c0	comp20703_c0_seq1	952	952	-	-	-	-	-	-	1814.02	1488.64	1591.85	799.02	581.13	849	46.09	42.78	51.63	25.33	21.84	27.26	1631.5	743.05	46.8333	24.81	0.916614	0.916614	0.00378249	0.0612704	no
comp8363_c0	comp8363_c0_seq1	4253	4253	P49641	alpha-mannosidase II	GO:0000139(Golgi membrane);GO:0016021(integral to membrane);GO:0004559(alpha-mannosidase activity);GO:0030246(carbohydrate binding);GO:0004572(mannosyl-oligosaccharide 1,3-1,6-alpha-mannosidase activity);GO:0008270(zinc ion binding);GO:0006013(mannose met	[G] Carbohydrate transport and metabolism	K01231	ko00510(N-Glycan biosynthesis)	1363.5	1316.53	1054.57	1927.14	1882.32	2131.01	7.28	7.95	7.19	12.84	14.86	14.37	1244.87	1980.16	7.47333	14.0233	-0.908006	0.908006	0.00376254	0.0612704	no
comp20423_c0	comp20423_c0_seq1	3371	3371	Q9XID3	-	GO:0016021(integral to membrane);GO:0044459(plasma membrane part);GO:0005524(ATP binding);GO:0005516(calmodulin binding);GO:0004674(protein serine/threonine kinase activity);GO:0004872(receptor activity);GO:0005529(sugar binding);GO:0048544(recognition of	-	K00924	-	1426.59	1261.24	1420.28	1933.04	1924.29	2144.97	9.65	9.65	12.27	16.32	19.26	18.34	1369.37	2000.77	10.5233	17.9733	-0.772266	0.772266	0.00376775	0.0612704	no
comp9633_c0	comp9633_c0_seq1,comp9633_c0_seq2	4173	4133.07	Q9LK40	DNA-directed RNA polymerase II subunit B	GO:0000418(DNA-directed RNA polymerase IV complex);GO:0000419(DNA-directed RNA polymerase V complex);GO:0005720(nuclear heterochromatin);GO:0003677(DNA binding);GO:0003899(DNA-directed RNA polymerase activity);GO:0046872(metal ion binding);GO:0005515(prot	[K] Transcription	K03010	ko00230(Purine metabolism);ko00240(Pyrimidine metabolism);ko03020(RNA polymerase);ko05016(Huntington's disease)	2910.6	2240.12	2117.75	2851.5	2505.06	2977.99	16	13.93	14.87	19.55	20.39	20.69	2422.82	2778.18	14.9333	20.21	-0.436533	0.436533	0.00377187	0.0612704	no
comp5230_c0	comp5230_c0_seq1	540	540	-	F-type H+-transporting ATPase subunit g	-	-	K02140	ko00190(Oxidative phosphorylation)	1601.99	1463.9	1513.35	605.78	616.97	827.36	76.69	79.27	92.48	36.19	43.68	50.05	1526.41	683.37	82.8133	43.3067	0.935274	0.935274	0.00379101	0.0613029	no
comp22116_c0	comp22116_c0_seq1	1414	1414	Q9C8L4	-	GO:0005739(mitochondrion);GO:0004416(hydroxyacylglutathione hydrolase activity);GO:0046872(metal ion binding);GO:0009651(response to salt stress)	[R] General function prediction only	K01774	-	1965.27	1974.14	1494.71	963.45	735.55	1043.11	32.72	37.18	31.76	20.01	18.11	21.94	1811.37	914.037	33.8867	20.02	0.759276	0.759276	0.00379144	0.0613029	no
comp12466_c0	comp12466_c0_seq1,comp12466_c0_seq2	1947	1680.33	Q9SEX2	microtubule-severing ATPase	GO:0005737(cytoplasm);GO:0005874(microtubule);GO:0005524(ATP binding);GO:0008568(microtubule-severing ATPase activity);GO:0005515(protein binding);GO:0043622(cortical microtubule organization);GO:0009825(multidimensional cell growth);GO:0009832(plant-type	[O] Posttranslational modification, protein turnover, chaperones	K07767	-	778.89	660.97	565.08	1016.36	973.13	1074	11.81	11.66	10.5	18.38	21.44	20.02	668.313	1021.16	11.3233	19.9467	-0.816849	0.816849	0.00379215	0.0613029	no
comp17223_c0	comp17223_c0_seq1	994	994	Q9LZ17	small subunit ribosomal protein S17e	GO:0005840(ribosome);GO:0003735(structural constituent of ribosome);GO:0006412(translation)	[J] Translation, ribosomal structure and biogenesis	K02962	ko03010(Ribosome)	18665.4	17917.5	17890.8	7163	7659.14	9602.5	452.62	491.45	553.77	216.74	274.69	294.2	18157.9	8141.55	499.28	261.877	0.930962	0.930962	0.00381042	0.0613091	no
comp22908_c0	comp22908_c0_seq1	3139	3139	Q9LM76	-	GO:0005737(cytoplasm);GO:0005634(nucleus);GO:0005886(plasma membrane);GO:0000151(ubiquitin ligase complex);GO:0070696(transmembrane receptor protein serine/threonine kinase binding);GO:0004842(ubiquitin-protein ligase activity);GO:0010150(leaf senescence)	[S] Function unknown	-	-	1411.86	1190.33	1203.63	1538.91	1420.67	1729.82	10.28	9.8	11.18	13.98	15.29	15.91	1268.61	1563.13	10.42	15.06	-0.531366	0.531366	0.00379421	0.0613091	no
comp13511_c0	comp13511_c0_seq1,comp13511_c0_seq2,comp13511_c0_seq3	9860	4380.85	-	-	-	[U] Intracellular trafficking, secretion, and vesicular transport	-	-	1108.04	974	819.56	2468.43	2150.83	2426.61	10.72	10.61	12.41	18.97	22.68	21.11	967.2	2348.62	11.2467	20.92	-0.895385	0.895385	0.00382393	0.0613263	no
comp17991_c0	comp17991_c0_seq1	1195	1195	Q9C944	histone H2A	GO:0000786(nucleosome);GO:0005634(nucleus);GO:0005773(vacuole);GO:0003677(DNA binding);GO:0005515(protein binding);GO:0042742(defense response to bacterium);GO:0016048(detection of temperature stimulus);GO:0006334(nucleosome assembly);GO:0009909(regulatio	[B] Chromatin structure and dynamics	K11251	ko05322(Systemic lupus erythematosus)	4542.18	4481.96	3959.11	1753.29	2107.59	2093.61	90.39	100.89	100.57	43.54	62.03	52.64	4327.75	1984.83	97.2833	52.7367	0.883386	0.883386	0.00382747	0.0613263	no
comp10287_c0	comp10287_c0_seq1,comp10287_c0_seq2,comp10287_c0_seq3,comp10287_c0_seq4	1789	1675.97	Q9SB00	deoxyribodipyrimidine photo-lyase	GO:0005634(nucleus);GO:0003904(deoxyribodipyrimidine photo-lyase activity);GO:0003677(DNA binding);GO:0000166(nucleotide binding);GO:0000719(photoreactive repair);GO:0009650(UV protection)	[L] Replication, recombination and repair ;[T] Signal transduction mechanisms	K01669	-	95.9	111	82.36	139	137	134	1.33	1.73	1.46	2.48	2.81	2.39	96.42	136.667	1.50667	2.56	-0.764784	0.764784	0.00381383	0.0613263	no
comp18691_c0	comp18691_c0_seq1	1970	1970	-	phospholipase C	-	-	K01114	ko00562(Inositol phosphate metabolism);ko00564(Glycerophospholipid metabolism);ko00565(Ether lipid metabolism)	7396.24	6949.12	6690.42	3809.57	3551.27	4336.96	87.03	92.49	100.49	55.93	61.8	64.48	7011.93	3899.27	93.3367	60.7367	0.619876	0.619876	0.00383449	0.0613357	no
comp8873_c0	comp8873_c0_seq1,comp8873_c0_seq2	2077	2043.74	Q84K00	-	GO:0005737(cytoplasm);GO:0005634(nucleus);GO:0003677(DNA binding);GO:0045893(positive regulation of transcription, DNA-dependent);GO:0009962(regulation of flavonoid biosynthetic process);GO:0009644(response to high light intensity);GO:0006351(transcriptio	-	-	-	2814.22	2308.46	2184.98	4204.27	3100.1	3865.83	31.52	29.28	31.17	58.94	51.69	54.85	2435.89	3723.4	30.6567	55.16	-0.847422	0.847422	0.00384099	0.0613485	no
comp12995_c0	comp12995_c0_seq1,comp12995_c0_seq2	2575	2404.52	B9DFI7	-	GO:0000139(Golgi membrane);GO:0016021(integral to membrane);GO:0008168(methyltransferase activity)	-	-	-	13202.2	10700.5	9977.45	16254	16388.9	17179.5	127.43	119.48	116.29	217.82	249.86	225.95	11293.4	16607.5	121.067	231.21	-0.933402	0.933402	0.00384441	0.0613827	no
comp10595_c1	comp10595_c1_seq1,comp10595_c1_seq2	1861	1850.9	Q9LV48	-	GO:0016021(integral to membrane);GO:0005886(plasma membrane);GO:0005524(ATP binding);GO:0004674(protein serine/threonine kinase activity);GO:0046777(protein autophosphorylation)	-	-	-	1198.07	1042	1079.98	1501.84	1138.88	1379.9	15.04	14.8	17.3	23.53	21.15	21.89	1106.68	1340.21	15.7133	22.19	-0.49792	0.49792	0.00384733	0.0613885	no
comp3835_c0	comp3835_c0_seq1,comp3835_c0_seq2	1495	1462.51	Q3HVN1	N-carbamoylputrescine amidase	GO:0050126(N-carbamoylputrescine amidase activity);GO:0006596(polyamine biosynthetic process)	[E] Amino acid transport and metabolism	K12251	ko00330(Arginine and proline metabolism)	2362.16	2208.87	1786.46	1207	1225.62	1315.98	38.05	40.18	36.64	24.17	29.11	26.89	2119.16	1249.53	38.29	26.7233	0.518868	0.518868	0.00385778	0.0614942	no
comp18261_c0	comp18261_c0_seq1	1773	1773	Q9C551	-	GO:0005829(cytosol);GO:0005730(nucleolus);GO:0005524(ATP binding);GO:0008026(ATP-dependent helicase activity);GO:0003723(RNA binding);GO:0006364(rRNA processing)	[A] RNA processing and modification	K01567	-	3137.53	2518	2568.84	4453.23	4298.99	4354.01	41.2	37.4	43.06	72.96	83.49	72.24	2741.46	4368.74	40.5533	76.23	-0.910538	0.910538	0.00385668	0.0614942	no
comp13088_c0	comp13088_c0_seq1	2538	2538	-	early endosome antigen 1	-	-	K12478	ko04144(Endocytosis);ko04145(Phagosome)	962.93	767.65	616.83	1450.14	1111.57	1187.98	8.72	7.86	7.13	16.38	14.88	13.59	782.47	1249.9	7.90333	14.95	-0.919612	0.919612	0.00387544	0.0616321	no
comp4220_c0	comp4220_c0_seq1	847	847	-	-	-	-	-	-	47624.4	42783.1	42851.5	22883.6	21292.5	22039.8	1374.47	1396.63	1578.62	824.09	908.86	803.68	44419.7	22072	1449.91	845.543	0.778009	0.778009	0.00389077	0.0617422	no
comp17218_c0	comp17218_c0_seq1	1125	1125	Q07796	Cu/Zn superoxide dismutase	GO:0005737(cytoplasm);GO:0046872(metal ion binding);GO:0004784(superoxide dismutase activity);GO:0006801(superoxide metabolic process)	[P] Inorganic ion transport and metabolism	K04565	ko04146(Peroxisome);ko05014(Amyotrophic lateral sclerosis (ALS));ko05016(Huntington's disease);ko05020(Prion diseases)	10669	10371	10233.7	4123.35	4168.15	5760.8	226.47	249	277.28	109.21	130.85	154.5	10424.6	4684.1	250.917	131.52	0.931926	0.931926	0.0038893	0.0617422	no
comp9560_c0	comp9560_c0_seq1,comp9560_c0_seq2,comp9560_c0_seq3	2868	2553.06	Q8H116	mannosyl-oligosaccharide alpha-1,2-mannosidase	GO:0000139(Golgi membrane);GO:0016021(integral to membrane);GO:0004559(alpha-mannosidase activity);GO:0005509(calcium ion binding);GO:0004571(mannosyl-oligosaccharide 1,2-alpha-mannosidase activity);GO:0006491(N-glycan processing);GO:0048364(root developm	[G] Carbohydrate transport and metabolism	K01230	ko00510(N-Glycan biosynthesis);ko00513(High-mannose type N-glycan biosynthesis)	1709.3	1666.67	1171.66	2257.97	2283.24	2473.72	15.53	17.06	13.63	25.04	30.2	27.74	1515.88	2338.31	15.4067	27.66	-0.844246	0.844246	0.00389471	0.0617544	no
comp17257_c1	comp17257_c1_seq1	1124	1124	-	-	-	[S] Function unknown	-	-	176	180	134.14	221	219.88	235	3.74	4.33	3.64	5.86	6.91	6.31	163.38	225.293	3.90333	6.36	-0.70432	0.70432	0.00393235	0.062057	no
comp3848_c0	comp3848_c0_seq1,comp3848_c0_seq2	1257	1170.68	Q9M376	vesicle-associated membrane protein 72	GO:0005768(endosome);GO:0016021(integral to membrane);GO:0031201(SNARE complex);GO:0006623(protein targeting to vacuole);GO:0016192(vesicle-mediated transport)	[U] Intracellular trafficking, secretion, and vesicular transport	K08511	-	2363.82	2096.06	1990.43	807.99	913.4	1067.15	48.75	48.3	51.25	20.76	27.59	27.7	2150.1	929.513	49.4333	25.35	0.963498	0.963498	0.00394016	0.0620759	no
comp9713_c0	comp9713_c0_seq1,comp9713_c0_seq2,comp9713_c0_seq3	2595	2583.55	Q8RXE7	-	GO:0005886(plasma membrane);GO:0008060(ARF GTPase activator activity);GO:0004674(protein serine/threonine kinase activity);GO:0008270(zinc ion binding);GO:0046777(protein autophosphorylation);GO:0032312(regulation of ARF GTPase activity)	[T] Signal transduction mechanisms	-	-	999.22	1217.56	812.48	1885.43	1366.53	1604.71	8.89	12.3	9.2	20.97	17.95	18.04	1009.75	1618.89	10.13	18.9867	-0.906352	0.906352	0.00395832	0.0622234	no
comp5048_c0	comp5048_c0_seq1,comp5048_c0_seq2	2225	2125.28	-	transcription initiation factor TFIIE alpha subunit	-	[K] Transcription	K03136	ko03022(Basal transcription factors)	1540.77	1354.29	1245.15	1601.01	1449.05	1694.24	16.81	16.76	17.33	21.7	23.19	23.3	1380.07	1581.43	16.9667	22.73	-0.421895	0.421895	0.00396462	0.0622663	no
comp20780_c0	comp20780_c0_seq1	2705	2705	Q9C641	elongation factor EF-G	GO:0005739(mitochondrion);GO:0005524(ATP binding);GO:0005525(GTP binding);GO:0003924(GTPase activity);GO:0003746(translation elongation factor activity);GO:0046686(response to cadmium ion)	[J] Translation, ribosomal structure and biogenesis	K02355	-	1893.97	1504.95	1694.77	2584.37	2653.46	2833.36	16.06	14.43	18.34	27.34	33.28	30.36	1697.9	2690.4	16.2767	30.3267	-0.897782	0.897782	0.00396738	0.0622893	no
comp5366_c0	comp5366_c0_seq1	1658	1658	Q9FGK3	calcium binding protein 39	GO:0005488(binding)	[S] Function unknown	K08272	ko04150(mTOR signaling pathway)	5717.67	5392.73	4990.09	3427.7	3185.36	3653.26	80.53	85.91	89.71	60.24	66.35	65.01	5366.83	3422.11	85.3833	63.8667	0.418891	0.418891	0.0039749	0.0623869	no
comp14147_c0	comp14147_c0_seq1,comp14147_c0_seq2,comp14147_c0_seq3	1866	1840.65	-	-	-	-	-	-	968.71	768.99	864.85	1192.09	1000.78	1278.55	12.22	10.93	13.85	18.75	18.62	20.35	867.517	1157.14	12.3333	19.24	-0.641546	0.641546	0.00401287	0.0625801	no
comp6060_c0	comp6060_c0_seq1,comp6060_c0_seq2	2454	2392.49	Q9FVW4	-	-	[A] RNA processing and modification	-	-	1892.82	1756.01	1552.62	1695.59	1517.63	1799.66	18.01	18.91	18.79	20.95	22.1	22.17	1733.82	1670.96	18.57	21.74	-0.227378	0.227378	0.00401715	0.0625801	no
comp29865_c0	comp29865_c0_seq1	2581	2581	Q0DCT8	protein-serine/threonine kinase	GO:0005524(ATP binding);GO:0004674(protein serine/threonine kinase activity)	[R] General function prediction only	K08286	-	709.96	616.16	467.18	322.12	237	263.13	6.32	6.2	5.31	3.58	3.12	2.96	597.767	274.083	5.94333	3.22	0.884212	0.884212	0.00401805	0.0625801	no
comp19757_c0	comp19757_c0_seq1	2223	2223	Q5M9G7	-	GO:0005634(nucleus);GO:0007275(multicellular organismal development)	[S] Function unknown	-	-	1642.48	1316.77	1511.61	2160.94	2207.05	2378.97	17.05	15.46	20.03	27.99	33.89	31.2	1490.29	2248.99	17.5133	31.0267	-0.825055	0.825055	0.00404315	0.0625801	no
comp7285_c0	comp7285_c0_seq1,comp7285_c0_seq2	983	973.31	-	-	-	-	-	-	725.04	587.07	534.75	331.96	310.97	404	18.07	16.55	16.91	10.2	11.39	12.64	615.62	348.977	17.1767	11.41	0.590151	0.590151	0.00404096	0.0625801	no
comp23602_c0	comp23602_c0_seq1	1726	1726	-	-	-	[I] Lipid transport and metabolism	-	-	1252.17	1079.07	1021.9	755.85	649.91	764.82	16.91	16.48	17.62	12.74	12.98	13.05	1117.71	723.527	17.0033	12.9233	0.395839	0.395839	0.0040326	0.0625801	no
comp4780_c1	comp4780_c1_seq1	1373	1373	Q42438	-	GO:0005886(plasma membrane);GO:0005524(ATP binding);GO:0005509(calcium ion binding);GO:0004674(protein serine/threonine kinase activity)	[T] Signal transduction mechanisms	K00924	-	1539.29	1445.25	1081.83	842.66	591.79	662.19	26.44	28.08	23.72	18.06	15.03	14.37	1355.46	698.88	26.08	15.82	0.721194	0.721194	0.00399824	0.0625801	no
comp14388_c0	comp14388_c0_seq1,comp14388_c0_seq2,comp14388_c0_seq3,comp14388_c0_seq4	2497	2390.2	Q9S793	-	GO:0005634(nucleus);GO:0008270(zinc ion binding)	-	-	-	252	231	224.96	138	126.89	151	2.45	2.53	2.77	1.67	1.83	1.87	235.987	138.63	2.58333	1.79	0.529274	0.529274	0.00404169	0.0625801	no
comp18401_c0	comp18401_c0_seq1	1421	1421	Q39366	lactoylglutathione lyase	GO:0004462(lactoylglutathione lyase activity);GO:0046872(metal ion binding)	[G] Carbohydrate transport and metabolism	K01759	ko00620(Pyruvate metabolism);ko04011(MAPK signaling pathway - yeast)	7990.85	6824.18	6837.08	3673.37	2937.1	3667.4	132.35	127.84	144.54	75.91	71.94	76.74	7217.37	3425.96	134.91	74.8633	0.849666	0.849666	0.00402065	0.0625801	no
comp16403_c0	comp16403_c0_seq1,comp16403_c0_seq10,comp16403_c0_seq11,comp16403_c0_seq12,comp16403_c0_seq13,comp16403_c0_seq14,comp16403_c0_seq15,comp16403_c0_seq16,comp16403_c0_seq17,comp16403_c0_seq18,comp16403_c0_seq19,comp16403_c0_seq2,comp16403_c0_seq20,comp16403_	4854	3466.26	A1JTC4	beta-galactosidase	GO:0009341(beta-galactosidase complex);GO:0004565(beta-galactosidase activity);GO:0030246(carbohydrate binding);GO:0046872(metal ion binding);GO:0005975(carbohydrate metabolic process)	-	K01190	ko00052(Galactose metabolism);ko00511(Other glycan degradation);ko00600(Sphingolipid metabolism)	2844.77	2672.17	2634.16	5223.24	4939.95	4961.6	21.77	24.01	24.07	44.28	50.42	44.02	2717.03	5041.6	23.2833	46.24	-0.989844	0.989844	0.00401414	0.0625801	no
comp2631_c0	comp2631_c0_seq1,comp2631_c0_seq2	1330	1286.77	Q9LZZ7	-	-	[S] Function unknown	-	-	259.99	213	182.26	291	253.93	338.24	4.85	4.47	4.34	6.75	7.03	7.73	218.417	294.39	4.55333	7.17	-0.65505	0.65505	0.00403035	0.0625801	no
comp8867_c0	comp8867_c0_seq1,comp8867_c0_seq2	2277	2131.55	A3KPF2	histone-arginine methyltransferase CARM1	GO:0005737(cytoplasm);GO:0005634(nucleus);GO:0016277([myelin basic protein]-arginine N-methyltransferase activity);GO:0008469(histone-arginine N-methyltransferase activity);GO:0046982(protein heterodimerization activity);GO:0042803(protein homodimerizatio	[O] Posttranslational modification, protein turnover, chaperones ;[K] Transcription	K05931	-	1971.33	2009.24	1388.03	1965.26	2092.57	2274.75	22.14	24.51	19.89	31.66	34.75	31.97	1789.53	2110.86	22.18	32.7933	-0.564143	0.564143	0.00404828	0.0625971	no
comp23098_c0	comp23098_c0_seq1	2728	2728	Q9FIE3	-	GO:0005634(nucleus);GO:0003677(DNA binding);GO:0005515(protein binding);GO:0008270(zinc ion binding);GO:0006355(regulation of transcription, DNA-dependent);GO:0001666(response to hypoxia);GO:0006351(transcription, DNA-dependent);GO:0010048(vernalization r	-	-	-	1146.69	1004.99	695.01	1443.2	1452.84	1731.42	9.64	9.56	7.46	15.14	18.06	18.39	948.897	1542.49	8.88667	17.1967	-0.952415	0.952415	0.00405233	0.0626194	no
comp19811_c0	comp19811_c0_seq1	2508	2508	Q0D598	serine/threonine-protein kinase WNK1	GO:0005524(ATP binding);GO:0004674(protein serine/threonine kinase activity)	[R] General function prediction only	K12132	ko04712(Circadian rhythm - plant)	2669.77	2788.98	1781.98	3927.61	3380.58	3537.51	24.47	28.91	20.85	44.92	45.83	40.97	2413.58	3615.23	24.7433	43.9067	-0.8274	0.8274	0.00405647	0.0626631	no
comp12272_c0	comp12272_c0_seq1,comp12272_c0_seq2,comp12272_c0_seq3	2485	2223.74	Q651X6	cellulose synthase A	GO:0000139(Golgi membrane);GO:0016021(integral to membrane);GO:0016760(cellulose synthase (UDP-forming) activity);GO:0007047(cellular cell wall organization);GO:0030244(cellulose biosynthetic process)	-	K10999	-	857.25	736.4	882.82	1231.13	1186.2	1421.07	9.35	8.5	11.63	16.24	19.79	18.65	825.49	1279.47	9.82667	18.2267	-0.891277	0.891277	0.00407291	0.0628186	no
comp22280_c0	comp22280_c0_seq1	4612	4612	Q8BTI8	-	GO:0016607(nuclear speck);GO:0005681(spliceosomal complex);GO:0006397(mRNA processing);GO:0008380(RNA splicing)	[Y] Nuclear structure ;[U] Intracellular trafficking, secretion, and vesicular transport	-	-	1524.07	1115.88	1423.16	2272.91	2096.9	2243.99	7.49	6.21	8.93	13.94	15.25	13.94	1354.37	2204.6	7.54333	14.3767	-0.930455	0.930455	0.00407617	0.0628264	no
comp4119_c0	comp4119_c0_seq1	1086	1086	-	-	-	-	-	-	2182.54	2030.69	1810.96	934.39	1008.75	1055.95	48.11	50.63	50.96	25.7	32.89	29.41	2008.06	999.697	49.9	29.3333	0.766499	0.766499	0.00407786	0.0628317	no
comp21539_c0	comp21539_c0_seq1	963	963	-	-	-	[M] Cell wall/membrane/envelope biogenesis	-	-	1383.21	1128.05	892	482	494	624	34.71	32.02	28.57	15.09	18.33	19.79	1134.42	533.333	31.7667	17.7367	0.840779	0.840779	0.00409565	0.0629315	no
comp20413_c0	comp20413_c0_seq1	936	936	O23429	vesicle-associated membrane protein 72	GO:0016021(integral to membrane);GO:0005886(plasma membrane);GO:0015031(protein transport);GO:0016192(vesicle-mediated transport)	[U] Intracellular trafficking, secretion, and vesicular transport	K08511	-	1929.74	1649.53	1503.39	688.65	704.22	872.24	49.94	48.29	49.67	22.24	26.96	28.52	1694.22	755.037	49.3	25.9067	0.928264	0.928264	0.00409823	0.0629393	no
comp11894_c0	comp11894_c0_seq1,comp11894_c0_seq2	2783	2777.43	O08815	-	GO:0005737(cytoplasm);GO:0005524(ATP binding);GO:0003677(DNA binding);GO:0004518(nuclease activity);GO:0005515(protein binding);GO:0004674(protein serine/threonine kinase activity);GO:0006915(apoptosis);GO:0006289(nucleotide-excision repair);GO:0046777(pr	-	-	-	13870.4	12176.5	11157.3	17014.1	14585.9	15650.3	114.34	113.57	117.45	175.01	177.86	163.05	12401.4	15750.1	115.12	171.973	-0.579046	0.579046	0.00411364	0.0631398	no
comp21684_c0	comp21684_c0_seq1	1632	1632	O64862	cell cycle protein MesJ	GO:0005737(cytoplasm);GO:0005524(ATP binding);GO:0016740(transferase activity);GO:0000049(tRNA binding);GO:0080157(regulation of plant-type cell wall organization or biogenesis);GO:0000302(response to reactive oxygen species);GO:0034227(tRNA thio-modifica	[R] General function prediction only	K04075	-	907	1014.04	739.34	1267.63	1286.86	1456.25	12.99	16.42	13.51	22.65	27.25	26.35	886.793	1336.91	14.3067	25.4167	-0.829087	0.829087	0.00411992	0.0631958	no
comp12659_c0	comp12659_c0_seq1,comp12659_c0_seq2,comp12659_c0_seq3,comp12659_c0_seq4	2019	1942.38	-	phosphoglycerate mutase	-	[G] Carbohydrate transport and metabolism	K01834	ko00010(Glycolysis / Gluconeogenesis)	789.31	652.06	486.83	891.02	895.43	1015.51	9.47	8.81	7.44	13.16	15.66	15.28	642.733	933.987	8.57333	14.7	-0.777888	0.777888	0.00413713	0.0633167	no
comp14878_c0	comp14878_c0_seq1,comp14878_c0_seq10,comp14878_c0_seq2,comp14878_c0_seq3,comp14878_c0_seq4,comp14878_c0_seq5,comp14878_c0_seq6,comp14878_c0_seq7,comp14878_c0_seq8,comp14878_c0_seq9	4754	3364.65	-	transcriptional adapter 2-alpha	-	-	K11314	-	403.03	332.84	276.01	693	596.4	733	2.56	3.05	2.79	5.39	4.79	4.56	337.293	674.133	2.8	4.91333	-0.811275	0.811275	0.00413577	0.0633167	no
comp19646_c0	comp19646_c0_seq1	2460	2460	O81360	zeaxanthin epoxidase	GO:0009507(chloroplast);GO:0016020(membrane);GO:0052663(antheraxanthin epoxidase activity);GO:0009540(zeaxanthin epoxidase [overall] activity);GO:0052662(zeaxanthin epoxidase activity);GO:0009688(abscisic acid biosynthetic process)	[C] Energy production and conversion ;[R] General function prediction only	K09838	ko00906(Carotenoid biosynthesis)	1049.19	847	754.95	1175.15	883.01	1136.97	9.81	8.96	9.01	13.71	12.21	13.43	883.713	1065.04	9.26	13.1167	-0.502317	0.502317	0.00414508	0.0633388	no
comp16013_c0	comp16013_c0_seq1,comp16013_c0_seq10,comp16013_c0_seq11,comp16013_c0_seq12,comp16013_c0_seq13,comp16013_c0_seq14,comp16013_c0_seq15,comp16013_c0_seq2,comp16013_c0_seq3,comp16013_c0_seq4,comp16013_c0_seq5,comp16013_c0_seq6,comp16013_c0_seq7,comp16013_c0_se	4368	2399.14	-	-	-	-	-	-	1162.01	798.57	897.03	2504.89	1767.43	1924.02	13.71	10.62	13.58	27.25	23.17	22.6	952.537	2065.45	12.6367	24.34	-0.945713	0.945713	0.00415348	0.0633473	no
comp16783_c0	comp16783_c0_seq1,comp16783_c0_seq2,comp16783_c0_seq3,comp16783_c0_seq4	1642	1352.48	Q9FFW5	-	GO:0016021(integral to membrane);GO:0005886(plasma membrane);GO:0005524(ATP binding);GO:0004674(protein serine/threonine kinase activity);GO:0005199(structural constituent of cell wall)	-	-	-	532.74	446.68	511.46	774.56	585.12	683.93	9.35	8.84	11.2	16.6	14.83	14.88	496.96	681.203	9.79667	15.4367	-0.655998	0.655998	0.00415789	0.0633531	no
comp16887_c0	comp16887_c0_seq1,comp16887_c0_seq10,comp16887_c0_seq11,comp16887_c0_seq12,comp16887_c0_seq13,comp16887_c0_seq14,comp16887_c0_seq15,comp16887_c0_seq16,comp16887_c0_seq17,comp16887_c0_seq18,comp16887_c0_seq19,comp16887_c0_seq2,comp16887_c0_seq20,comp16887_	3273	2366.08	-	-	-	[R] General function prediction only	-	-	4020.22	3589.54	3293.54	3948.25	3169.82	3513.64	35.85	35.58	39.78	51.01	47.56	46.52	3634.43	3543.9	37.07	48.3633	-0.383662	0.383662	0.00416926	0.0634055	no
comp21503_c0	comp21503_c0_seq1	3404	3404	-	-	-	-	-	-	1962.71	1584.31	1164.94	2335.38	2315.22	2307.42	13.15	12.01	9.96	19.52	22.94	19.53	1570.65	2319.34	11.7067	20.6633	-0.819743	0.819743	0.00416476	0.0634055	no
comp7930_c0	comp7930_c0_seq1,comp7930_c0_seq2	2423	2319.41	Q9SEK3	hexokinase	GO:0009707(chloroplast outer membrane);GO:0016021(integral to membrane);GO:0005524(ATP binding);GO:0004396(hexokinase activity);GO:0006096(glycolysis)	[G] Carbohydrate transport and metabolism	K00844	ko00010(Glycolysis / Gluconeogenesis);ko00051(Fructose and mannose metabolism);ko00052(Galactose metabolism);ko00500(Starch and sucrose metabolism);ko00520(Amino sugar and nucleotide sugar metabolism);ko00521(Streptomycin biosynthesis);ko00524(Butirosin a	2020.23	1777.41	1374.06	2308.84	1793.59	2419.12	20.2	20.01	17.49	28.56	26.3	30.32	1723.9	2173.85	19.2333	28.3933	-0.561943	0.561943	0.00416869	0.0634055	no
comp158260_c0	comp158260_c0_seq1	540	540	-	-	-	-	-	-	33.04	27	26.97	13	15	15	1.58	1.46	1.65	0.78	1.06	0.91	29.0033	14.3333	1.56333	0.916667	0.770156	0.770156	0.00416735	0.0634055	no
comp11207_c0	comp11207_c0_seq1,comp11207_c0_seq2,comp11207_c0_seq3,comp11207_c0_seq4,comp11207_c0_seq5,comp11207_c0_seq6	2679	1993.18	B2UQ30	GTP-binding protein	GO:0005737(cytoplasm);GO:0005525(GTP binding);GO:0003924(GTPase activity);GO:0000287(magnesium ion binding)	[R] General function prediction only	K03979	-	644.04	529.52	431.6	815.67	816.81	830.29	7.55	6.95	6.44	11.92	13.92	12.16	535.053	820.923	6.98	12.6667	-0.859738	0.859738	0.00416719	0.0634055	no
comp20397_c0	comp20397_c0_seq1	4695	4695	Q9ZUE0	-	GO:0016021(integral to membrane);GO:0005886(plasma membrane);GO:0005524(ATP binding);GO:0004674(protein serine/threonine kinase activity);GO:0032502(developmental process)	-	-	-	1996.84	1726.81	1948.92	3384.93	2767.98	3368.97	9.64	9.43	12.01	20.39	19.76	20.55	1890.86	3173.96	10.36	20.2333	-0.96571	0.96571	0.00417566	0.0634828	no
comp13433_c0	comp13433_c0_seq1,comp13433_c0_seq2,comp13433_c0_seq3,comp13433_c0_seq4,comp13433_c0_seq5,comp13433_c0_seq6	3788	3028.33	Q9SGQ0	-	-	-	-	-	2156.06	1898.81	1999.65	3148.71	3142.65	3306.25	16.64	16.57	19.65	28.81	34.61	31.33	2018.17	3199.2	17.62	31.5833	-0.84195	0.84195	0.00418026	0.0635103	no
comp20953_c0	comp20953_c0_seq1	1287	1287	Q07100	protein phosphatase 2 (formerly 2A), catalytic subunit	GO:0005737(cytoplasm);GO:0005634(nucleus);GO:0005886(plasma membrane);GO:0046872(metal ion binding);GO:0004721(phosphoprotein phosphatase activity)	[T] Signal transduction mechanisms	K04382	ko04111(Cell cycle - yeast);ko04113(Meiosis - yeast);ko04114(Oocyte meiosis);ko04310(Wnt signaling pathway);ko04350(TGF-beta signaling pathway);ko04530(Tight junction);ko04730(Long-term depression);ko05142(Chagas disease)	1325.48	1051	937	1567.33	1531.84	1753	24.38	21.86	22	35.97	41.67	40.74	1104.49	1617.39	22.7467	39.46	-0.794736	0.794736	0.00418486	0.0635123	no
comp19226_c0	comp19226_c0_seq1	3418	3418	P14105	myosin heavy chain	GO:0005826(actomyosin contractile ring);GO:0032154(cleavage furrow);GO:0005829(cytosol);GO:0016459(myosin complex);GO:0005634(nucleus);GO:0005886(plasma membrane);GO:0001726(ruffle);GO:0001725(stress fiber);GO:0051015(actin filament binding);GO:0005524(AT	-	K10352	ko04530(Tight junction);ko05416(Viral myocarditis)	2118.3	1855.34	1355.08	2944.1	2605.05	2529.01	14.13	14	11.54	24.51	25.7	21.32	1776.24	2692.72	13.2233	23.8433	-0.8505	0.8505	0.00419005	0.0635123	no
comp12317_c0	comp12317_c0_seq1,comp12317_c0_seq2	1985	1766.17	Q6Z1G7	pyruvate dehydrogenase E1 component subunit beta	-	[C] Energy production and conversion	K00162	ko00010(Glycolysis / Gluconeogenesis);ko00020(Citrate cycle (TCA cycle));ko00290(Valine, leucine and isoleucine biosynthesis);ko00620(Pyruvate metabolism);ko00650(Butanoate metabolism)	6421.62	5815.49	5721.39	3537.43	3117.1	3977.06	85.72	87.7	97.01	58.58	60.03	65.6	5986.17	3543.86	90.1433	61.4033	0.553904	0.553904	0.00418904	0.0635123	no
comp23591_c0	comp23591_c0_seq1	635	635	Q1SF86	autophagy-related protein 12	GO:0005737(cytoplasm);GO:0000045(autophagic vacuole assembly);GO:0015031(protein transport)	[O] Posttranslational modification, protein turnover, chaperones	K08336	ko04140(Regulation of autophagy);ko04622(RIG-I-like receptor signaling pathway)	504.47	483.98	448.75	175	196.71	259.01	20.06	21.77	22.78	8.68	11.57	13.01	479.067	210.24	21.5367	11.0867	0.957969	0.957969	0.0041985	0.0635482	no
comp21729_c0	comp21729_c0_seq1	746	746	-	DNA polymerase delta subunit 4	-	-	K03505	ko00230(Purine metabolism);ko00240(Pyrimidine metabolism);ko03030(DNA replication);ko03410(Base excision repair);ko03420(Nucleotide excision repair);ko03430(Mismatch repair);ko03440(Homologous recombination)	1623.72	1501.85	1260.53	603.95	642.65	778.98	53.9	56.4	53.42	25.02	31.55	32.67	1462.03	675.193	54.5733	29.7467	0.875468	0.875468	0.0042002	0.0635539	no
comp5214_c0	comp5214_c0_seq1,comp5214_c0_seq2	2219	1941.38	-	-	-	-	-	-	1457.28	1474.62	1069.07	1848.56	1489.1	1716.45	17.19	19.73	16.34	27.83	26.42	26.1	1333.66	1684.7	17.7533	26.7833	-0.593246	0.593246	0.00421638	0.063674	no
comp13227_c0	comp13227_c0_seq1,comp13227_c0_seq2	1474	1381.44	-	-	-	[R] General function prediction only	-	-	2048.75	1960.46	1683.27	1976.6	1802.12	2065.08	33.21	36.93	34.9	44.69	46.31	45.28	1897.49	1947.93	35.0133	45.4267	-0.375635	0.375635	0.0042396	0.0639075	no
comp16286_c0	comp16286_c0_seq1,comp16286_c0_seq2	3717	3702.88	Q9CA75	xyloglucan 6-xylosyltransferase	GO:0000139(Golgi membrane);GO:0016021(integral to membrane);GO:0016758(transferase activity, transferring hexosyl groups);GO:0033843(xyloglucan 6-xylosyltransferase activity);GO:0048767(root hair elongation)	[G] Carbohydrate transport and metabolism ;[M] Cell wall/membrane/envelope biogenesis	K08238	-	13819.5	11883.4	9180.16	13820.4	13208.5	14609	84.97	82.64	72.04	106.04	120.12	113.51	11627.7	13879.3	79.8833	113.223	-0.503205	0.503205	0.00423993	0.0639075	no
comp21188_c0	comp21188_c0_seq1	1152	1152	Q9XII1	-	GO:0031359(integral to chloroplast outer membrane);GO:0005515(protein binding);GO:0043572(plastid fission)	-	-	-	2167.77	1684.9	1752.43	940.5	765.26	814.03	44.86	39.44	46.29	24.29	23.42	21.29	1868.37	839.93	43.53	23	0.920376	0.920376	0.00424148	0.0639075	no
comp14627_c0	comp14627_c0_seq1,comp14627_c0_seq2,comp14627_c0_seq3,comp14627_c0_seq4	1267	1100.08	-	-	-	-	-	-	1455.47	1200.97	1132.74	953.92	754.91	837.97	32.23	29.41	32.35	25.07	23.96	22.16	1263.06	848.933	31.33	23.73	0.400833	0.400833	0.00424943	0.0639439	no
comp49906_c0	comp49906_c0_seq1	2613	2613	Q9FRI5	-	GO:0005488(binding)	[R] General function prediction only	-	-	194.04	205.81	198	275.83	257	297	1.7	2.05	2.22	3.02	3.34	3.3	199.283	276.61	1.99	3.22	-0.694292	0.694292	0.00425076	0.0639439	no
comp14964_c0	comp14964_c0_seq1	483	483	Q9FJA6	small subunit ribosomal protein S3e	GO:0022627(cytosolic small ribosomal subunit);GO:0016020(membrane);GO:0005730(nucleolus);GO:0009506(plasmodesma);GO:0003723(RNA binding);GO:0003735(structural constituent of ribosome);GO:0009651(response to salt stress);GO:0006412(translation)	[J] Translation, ribosomal structure and biogenesis	K02985	ko03010(Ribosome)	111	143	113.51	222.83	157.16	208	6.05	8.82	7.9	15.17	12.68	14.33	122.503	195.997	7.59	14.06	-0.889425	0.889425	0.00425263	0.063944	no
comp13190_c0	comp13190_c0_seq1,comp13190_c0_seq2,comp13190_c0_seq3	1615	1346.7	Q8H1Q8	-	-	[S] Function unknown	-	-	494	440.96	327	552.91	455.99	577	10.83	9.97	9.53	12.78	13.6	13.29	420.653	528.633	10.11	13.2233	-0.387303	0.387303	0.00426478	0.0640664	no
comp15204_c1	comp15204_c1_seq1,comp15204_c1_seq2,comp15204_c1_seq3,comp15204_c1_seq4,comp15204_c1_seq5,comp15204_c1_seq6,comp15204_c1_seq7,comp15204_c1_seq8	4395	3728.68	Q8L706	spermidine synthase	-	[R] General function prediction only	K00797	ko00270(Cysteine and methionine metabolism);ko00330(Arginine and proline metabolism);ko00410(beta-Alanine metabolism);ko00480(Glutathione metabolism)	11876.5	10525	7696.06	15239.7	14717.8	17319	73.04	72.93	61.63	109.58	128.15	129.29	10032.5	15758.8	69.2	122.34	-0.822052	0.822052	0.00428421	0.0643181	no
comp11963_c0	comp11963_c0_seq1,comp11963_c0_seq2	4601	4441.85	O74555	-	GO:0000243(commitment complex);GO:0005829(cytosol);GO:0003723(RNA binding);GO:0008270(zinc ion binding);GO:0000349(generation of catalytic spliceosome for first transesterification step)	[A] RNA processing and modification	-	-	2923.96	2146.06	2653.32	4919.47	3506.39	4055.56	14.76	12.34	17.16	32.77	27.52	27.02	2574.45	4160.47	14.7533	29.1033	-0.980143	0.980143	0.00428934	0.064375	no
comp25123_c0	comp25123_c0_seq1	1299	1299	-	-	-	-	-	-	1012.31	855.42	869.51	526.34	476.44	497	18.44	17.62	20.21	11.96	12.83	11.44	912.413	499.927	18.7567	12.0767	0.635181	0.635181	0.00429292	0.0643885	no
comp16681_c2	comp16681_c2_seq1,comp16681_c2_seq10,comp16681_c2_seq100,comp16681_c2_seq101,comp16681_c2_seq102,comp16681_c2_seq103,comp16681_c2_seq104,comp16681_c2_seq105,comp16681_c2_seq106,comp16681_c2_seq11,comp16681_c2_seq12,comp16681_c2_seq13,comp16681_c2_seq14,co	4214	1620.22	-	-	-	-	-	-	1209.85	926.95	1031.97	1570.83	1380.54	1610.58	20.65	15.48	20.21	32.14	30.1	33.86	1056.26	1520.65	18.78	32.0333	-0.770377	0.770377	0.00430231	0.0643906	no
comp7603_c0	comp7603_c0_seq1,comp7603_c0_seq2	3128	3047.85	Q39YM4	UDP-N-acetylmuramoylalanyl-D-glutamate--2,6-diaminopimelate ligase	GO:0005737(cytoplasm);GO:0005524(ATP binding);GO:0008765(UDP-N-acetylmuramoylalanyl-D-glutamate-2,6-diaminopimelate ligase activity);GO:0007049(cell cycle);GO:0051301(cell division);GO:0007047(cellular cell wall organization);GO:0009252(peptidoglycan bios	-	K01928	ko00300(Lysine biosynthesis);ko00550(Peptidoglycan biosynthesis)	625	467.02	454.75	756.87	760.13	791	4.64	3.94	4.36	7.11	8.4	7.48	515.59	769.333	4.31333	7.66333	-0.829169	0.829169	0.00430245	0.0643906	no
comp6287_c0	comp6287_c0_seq1,comp6287_c0_seq2	2691	2627.69	-	-	-	[A] RNA processing and modification ;[R] General function prediction only	-	-	1913.82	1461.22	1577.22	2308.27	1851.2	2300.41	16.75	14.47	17.6	25.14	23.86	25.31	1650.75	2153.29	16.2733	24.77	-0.606084	0.606084	0.00430891	0.0644127	no
comp16380_c0	comp16380_c0_seq1,comp16380_c0_seq10,comp16380_c0_seq11,comp16380_c0_seq12,comp16380_c0_seq13,comp16380_c0_seq14,comp16380_c0_seq15,comp16380_c0_seq16,comp16380_c0_seq17,comp16380_c0_seq18,comp16380_c0_seq19,comp16380_c0_seq2,comp16380_c0_seq20,comp16380_	3020	1600.49	-	-	-	-	-	-	297	265.03	225.97	381.01	337.89	378.65	3.87	4.72	3.64	7.29	6.75	6.19	262.667	365.85	4.07667	6.74333	-0.726072	0.726072	0.0043093	0.0644127	no
comp16551_c0	comp16551_c0_seq1,comp16551_c0_seq2,comp16551_c0_seq3	2664	2456.15	Q9FGR7	-	GO:0009507(chloroplast);GO:0005488(binding)	[R] General function prediction only	-	-	557.87	559.16	415.48	915.67	785.04	778.3	5.52	6.09	5.06	11.01	10.91	9.29	510.837	826.337	5.55667	10.4033	-0.904754	0.904754	0.00431408	0.0644528	no
comp21777_c0	comp21777_c0_seq1	2361	2361	Q9LXD9	pectinesterase	GO:0005618(cell wall);GO:0005576(extracellular region);GO:0045330(aspartyl esterase activity);GO:0004857(enzyme inhibitor activity);GO:0030599(pectinesterase activity);GO:0042545(cell wall modification);GO:0007047(cellular cell wall organization)	-	K01051	ko00040(Pentose and glucuronate interconversions);ko00500(Starch and sucrose metabolism)	2847.42	2217.08	1804.29	1180.68	740.94	1055.84	27.78	24.46	22.47	14.37	10.69	13.01	2289.6	992.487	24.9033	12.69	0.972647	0.972647	0.00432291	0.0644907	no
comp13297_c0	comp13297_c0_seq1,comp13297_c0_seq2,comp13297_c0_seq3,comp13297_c0_seq4	3199	3098.12	-	-	-	-	-	-	391.99	354	300.79	594.99	559.59	585.99	2.94	2.94	2.87	5.5	6.06	5.47	348.927	580.19	2.91667	5.67667	-0.960724	0.960724	0.00432392	0.0644907	no
comp20136_c0	comp20136_c0_seq1	2808	2808	Q9FUY2	-	GO:0005634(nucleus);GO:0046982(protein heterodimerization activity);GO:0030154(cell differentiation);GO:0009908(flower development);GO:0080001(mucilage extrusion from seed coat);GO:0045892(negative regulation of transcription, DNA-dependent);GO:0006351(tr	[R] General function prediction only	-	-	1987.34	1902.18	1329.41	2566.18	2613.12	2984.62	16.22	17.56	13.85	26.13	31.54	30.77	1739.64	2721.31	15.8767	29.48	-0.892828	0.892828	0.00432677	0.0644938	no
comp19241_c0	comp19241_c0_seq1	3922	3922	Q9M081	non-specific serine/threonine protein kinase	GO:0030127(COPII vesicle coat);GO:0005829(cytosol);GO:0005789(endoplasmic reticulum membrane);GO:0033116(endoplasmic reticulum-Golgi intermediate compartment membrane);GO:0000139(Golgi membrane);GO:0008270(zinc ion binding);GO:0006888(ER to Golgi vesicle-	[U] Intracellular trafficking, secretion, and vesicular transport	K08282	-	3397.93	2628.54	3028.71	4010.24	3755.11	4499.8	19.7	17.24	22.41	29.01	32.2	32.96	3018.39	4088.38	19.7833	31.39	-0.666019	0.666019	0.00433496	0.064495	no
comp14235_c0	comp14235_c0_seq1,comp14235_c0_seq2,comp14235_c0_seq3,comp14235_c0_seq4,comp14235_c0_seq5	1982	1557.07	-	-	-	[D] Cell cycle control, cell division, chromosome partitioning ;[L] Replication, recombination and repair	-	-	320.59	277	298.97	357.54	358	377	4.31	4.77	4.46	7.7	8.82	7.85	298.853	364.18	4.51333	8.12333	-0.847879	0.847879	0.00435	0.0645786	no
comp25411_c0	comp25411_c0_seq1	1310	1310	Q94AN4	AP2-like factor, ANT lineage	GO:0005634(nucleus);GO:0003677(DNA binding);GO:0003700(sequence-specific DNA binding transcription factor activity);GO:0009873(ethylene mediated signaling pathway);GO:0010187(negative regulation of seed germination);GO:0040008(regulation of growth);GO:000	-	K09285	-	439.96	427.09	337.67	615.18	525.94	535.36	7.94	8.72	7.78	13.86	14.04	12.21	401.573	558.827	8.14667	13.37	-0.714718	0.714718	0.00436075	0.0646382	no
comp15774_c0	comp15774_c0_seq1,comp15774_c0_seq2,comp15774_c0_seq3,comp15774_c0_seq4,comp15774_c0_seq5,comp15774_c0_seq6,comp15774_c0_seq7	1297	721.83	-	ubiquitin-conjugating enzyme E2 D/E	-	-	K06689	ko04120(Ubiquitin mediated proteolysis)	743.14	601.01	534	858.47	727.25	857.07	24.1	20.89	24.51	32.67	33.14	30.37	626.05	814.263	23.1667	32.06	-0.468724	0.468724	0.00436608	0.0646773	no
comp3153_c0	comp3153_c0_seq1,comp3153_c0_seq2	2911	2859.02	Q9FFN1	-	GO:0005488(binding);GO:0009793(embryo development ending in seed dormancy)	[R] General function prediction only	-	-	231	192	209.99	278	266.95	327	1.88	1.77	2.19	2.79	3.19	3.25	210.997	290.65	1.94667	3.07667	-0.660362	0.660362	0.00437209	0.0647364	no
comp14522_c1	comp14522_c1_seq1,comp14522_c1_seq10,comp14522_c1_seq11,comp14522_c1_seq12,comp14522_c1_seq13,comp14522_c1_seq14,comp14522_c1_seq15,comp14522_c1_seq16,comp14522_c1_seq17,comp14522_c1_seq18,comp14522_c1_seq19,comp14522_c1_seq2,comp14522_c1_seq20,comp14522_	2857	1742.6	Q39237	plant G-box-binding factor	GO:0005634(nucleus);GO:0046983(protein dimerization activity);GO:0043565(sequence-specific DNA binding);GO:0003700(sequence-specific DNA binding transcription factor activity);GO:0042742(defense response to bacterium)	-	K09060	-	985.1	1030.2	907.08	1276.98	1123.93	1187	13.21	15.36	15.98	21.84	22.6	20.02	974.127	1195.97	14.85	21.4867	-0.532979	0.532979	0.00439244	0.0648277	no
comp17620_c0	comp17620_c0_seq1	748	748	Q9SYA6	DNA-directed RNA Polymerase II subunit L	GO:0005634(nucleus);GO:0003677(DNA binding);GO:0003899(DNA-directed RNA polymerase activity);GO:0008270(zinc ion binding);GO:0006355(regulation of transcription, DNA-dependent)	[K] Transcription	K03007	ko00230(Purine metabolism);ko00240(Pyrimidine metabolism);ko03020(RNA polymerase);ko05016(Huntington's disease)	7927.53	7238.1	6754.01	3519.9	3375.99	4503.62	262.4	270.99	285.36	145.38	165.27	188.35	7306.55	3799.84	272.917	166.333	0.714383	0.714383	0.00442037	0.0649602	no
comp11064_c0	comp11064_c0_seq1,comp11064_c0_seq2,comp11064_c0_seq3	2054	1963.63	-	-	-	[R] General function prediction only	-	-	7627.45	6223.15	6566.59	8209.34	7860.13	8716.83	90.19	83.27	99.17	120.68	137.07	129.82	6805.73	8262.1	90.8767	129.19	-0.507513	0.507513	0.00441307	0.0649602	no
comp20467_c0	comp20467_c0_seq1	1561	1561	Q8VYN2	-	GO:0005886(plasma membrane);GO:0005198(structural molecule activity)	[U] Intracellular trafficking, secretion, and vesicular transport	-	-	2660.6	2487.42	2328.41	957.07	1168.16	1237.47	39.92	42.21	44.59	17.92	25.92	23.46	2492.14	1120.9	42.24	22.4333	0.912966	0.912966	0.00441837	0.0649602	no
comp17106_c0	comp17106_c0_seq1	960	960	P51823	Arf/Sar family, other	GO:0005794(Golgi apparatus);GO:0005525(GTP binding);GO:0006886(intracellular protein transport);GO:0006471(protein ADP-ribosylation);GO:0007264(small GTPase mediated signal transduction);GO:0016192(vesicle-mediated transport)	[U] Intracellular trafficking, secretion, and vesicular transport	K07977	-	40732.4	34602.8	34797.2	19728.9	19379.7	24072.8	1025.63	985.52	1118.41	619.87	721.71	765.85	36710.8	21060.5	1043.19	702.477	0.570475	0.570475	0.00443485	0.0650186	no
comp18457_c0	comp18457_c0_seq1	771	771	O22969	-	GO:0005829(cytosol);GO:0003676(nucleic acid binding)	-	-	-	4500.76	3356.01	3081.63	1241.9	1610.67	1791.12	144.06	121.5	125.9	49.6	76.25	72.43	3646.13	1547.9	130.487	66.0933	0.981326	0.981326	0.00443286	0.0650186	no
comp14962_c0	comp14962_c0_seq1,comp14962_c0_seq2,comp14962_c0_seq3	1223	1033.73	-	-	-	-	-	-	118	119.41	133	264.99	236.21	229	3	3.25	4.42	7	7.53	6.53	123.47	243.4	3.55667	7.02	-0.980945	0.980945	0.00445211	0.0651095	no
comp18412_c0	comp18412_c0_seq1	2476	2476	-	-	-	-	-	-	5021.41	4245.98	3707.84	5769.19	5239.48	5503.5	46.64	44.61	43.96	66.86	71.97	64.58	4325.08	5504.06	45.07	67.8033	-0.589189	0.589189	0.00446647	0.0652382	no
comp28761_c0	comp28761_c0_seq1	1927	1927	-	-	-	-	-	-	496	512.19	447.41	609	531.99	567	5.97	6.98	6.88	9.15	9.47	8.63	485.2	569.33	6.61	9.08333	-0.458572	0.458572	0.00448834	0.0653191	no
comp16903_c0	comp16903_c0_seq1,comp16903_c0_seq10,comp16903_c0_seq11,comp16903_c0_seq12,comp16903_c0_seq2,comp16903_c0_seq3,comp16903_c0_seq4,comp16903_c0_seq5,comp16903_c0_seq6,comp16903_c0_seq7,comp16903_c0_seq8,comp16903_c0_seq9	3741	3043.84	Q9FIX3	-	GO:0005488(binding)	[R] General function prediction only	-	-	917.87	820.88	709.6	1288.39	1029.52	1326.85	7.03	7.06	6.95	12.02	11.47	12.68	816.117	1214.92	7.01333	12.0567	-0.781659	0.781659	0.00448754	0.0653191	no
comp23771_c0	comp23771_c0_seq1	1820	1820	-	-	-	[K] Transcription	-	-	765.82	748.86	530.57	918.94	883.33	897.81	9.79	10.82	8.65	14.65	16.69	14.49	681.75	900.027	9.75333	15.2767	-0.647363	0.647363	0.00448354	0.0653191	no
comp135788_c0	comp135788_c0_seq1	375	375	-	-	-	-	-	-	20	15	14	20	17	21	1.48	1.26	1.32	1.85	1.86	1.97	16.3333	19.3333	1.35333	1.89333	-0.484411	0.484411	0.00450417	0.0654212	no
comp13091_c0	comp13091_c0_seq1,comp13091_c0_seq2,comp13091_c0_seq3,comp13091_c0_seq4	2428	1990.74	P08216	malate synthase	GO:0009514(glyoxysome);GO:0004474(malate synthase activity);GO:0006097(glyoxylate cycle);GO:0006099(tricarboxylic acid cycle)	[C] Energy production and conversion	K01638	ko00620(Pyruvate metabolism);ko00630(Glyoxylate and dicarboxylate metabolism)	676.07	641.94	633	1187.94	977.9	1154.92	9.28	9.9	11.15	18.2	18.07	18.13	650.337	1106.92	10.11	18.1333	-0.842861	0.842861	0.00451266	0.0654529	no
comp22395_c0	comp22395_c0_seq1	1124	1124	-	-	-	-	-	-	980.61	897.61	691.86	360.49	388.41	497.87	20.83	21.57	18.76	9.56	12.21	13.37	856.693	415.59	20.3867	11.7133	0.799474	0.799474	0.00452463	0.0654675	no
comp21365_c0	comp21365_c0_seq1	769	769	O70333	-	GO:0030054(cell junction);GO:0005737(cytoplasm)	[Z] Cytoskeleton	-	-	1484.62	1172.65	1083.9	676.24	589.19	656.02	47.66	42.58	44.41	27.09	27.97	26.61	1247.06	640.483	44.8833	27.2233	0.721336	0.721336	0.00453694	0.0654902	no
comp15142_c0	comp15142_c0_seq1,comp15142_c0_seq10,comp15142_c0_seq11,comp15142_c0_seq12,comp15142_c0_seq13,comp15142_c0_seq14,comp15142_c0_seq15,comp15142_c0_seq16,comp15142_c0_seq17,comp15142_c0_seq18,comp15142_c0_seq19,comp15142_c0_seq2,comp15142_c0_seq20,comp15142_	1413	950.46	-	-	-	-	-	-	353.03	405.03	269.42	534.02	489	511.29	9.69	11.98	9.86	16.11	17.17	15.39	342.493	511.437	10.51	16.2233	-0.626308	0.626308	0.00453263	0.0654902	no
comp15110_c1	comp15110_c1_seq1,comp15110_c1_seq2,comp15110_c1_seq3,comp15110_c1_seq4,comp15110_c1_seq5	1807	1039.19	O81488	-	GO:0005829(cytosol);GO:0005634(nucleus);GO:0035064(methylated histone residue binding);GO:0008270(zinc ion binding);GO:0016568(chromatin modification);GO:0006355(regulation of transcription, DNA-dependent);GO:0006351(transcription, DNA-dependent)	[R] General function prediction only	-	-	334.01	264	185.99	541.08	404	486	7.82	6.31	5.79	13.12	10.93	11.44	261.333	477.027	6.64	11.83	-0.833195	0.833195	0.00456623	0.0657144	no
comp28013_c0	comp28013_c0_seq1	823	823	-	-	-	-	-	-	423	324	333.6	175	191.99	195.06	12.6	10.92	12.68	6.5	8.46	7.34	360.2	187.35	12.0667	7.43333	0.698946	0.698946	0.00456558	0.0657144	no
comp23375_c0	comp23375_c0_seq1	823	823	B9KBJ9	large subunit ribosomal protein L11	GO:0005840(ribosome);GO:0019843(rRNA binding);GO:0003735(structural constituent of ribosome);GO:0006412(translation)	[J] Translation, ribosomal structure and biogenesis	K02867	ko03010(Ribosome)	741.67	785.44	694.28	292.73	329.6	406	22.09	26.46	26.4	10.88	14.52	15.28	740.463	342.777	24.9833	13.56	0.881609	0.881609	0.00457031	0.0657144	no
comp15847_c0	comp15847_c0_seq1,comp15847_c0_seq10,comp15847_c0_seq11,comp15847_c0_seq12,comp15847_c0_seq2,comp15847_c0_seq3,comp15847_c0_seq4,comp15847_c0_seq5,comp15847_c0_seq6,comp15847_c0_seq7,comp15847_c0_seq8,comp15847_c0_seq9	2896	2251.91	Q09758	-	GO:0005829(cytosol);GO:0005789(endoplasmic reticulum membrane);GO:0016021(integral to membrane);GO:0005886(plasma membrane);GO:0008374(O-acyltransferase activity);GO:0015793(glycerol transport);GO:0006506(GPI anchor biosynthetic process)	[T] Signal transduction mechanisms	-	-	1629.01	1438.54	1528.04	1998	1481.48	1985.98	14.48	14.1	16.74	22.22	20.08	22.57	1531.86	1821.82	15.1067	21.6233	-0.517404	0.517404	0.0045821	0.0657144	no
comp40211_c0	comp40211_c0_seq1	880	880	-	-	-	-	-	-	421.76	297.62	297.99	167	104	169	11.67	9.32	10.53	5.77	4.26	5.91	339.123	146.667	10.5067	5.31333	0.983616	0.983616	0.00456491	0.0657144	no
comp17150_c0	comp17150_c0_seq1	727	727	Q9FGZ9	-	GO:0005737(cytoplasm)	[O] Posttranslational modification, protein turnover, chaperones	-	-	13713	11394.6	11644.5	6587.48	5561.29	8023.6	468.49	440.33	507.81	280.82	281	346.35	12250.7	6724.12	472.21	302.723	0.641429	0.641429	0.00460167	0.0658306	no
comp7648_c0	comp7648_c0_seq1	2480	2480	-	-	-	-	-	-	1520.19	1491.93	1329.39	2046.73	1816.59	1841.22	14.1	15.65	15.73	23.68	24.91	21.57	1447.17	1901.51	15.16	23.3867	-0.625416	0.625416	0.00460156	0.0658306	no
comp13533_c0	comp13533_c0_seq1,comp13533_c0_seq2,comp13533_c0_seq3,comp13533_c0_seq4,comp13533_c0_seq5,comp13533_c0_seq6,comp13533_c0_seq7,comp13533_c0_seq8	4458	4095.76	P98205	phospholipid-translocating ATPase	GO:0005789(endoplasmic reticulum membrane);GO:0016021(integral to membrane);GO:0031902(late endosome membrane);GO:0009506(plasmodesma);GO:0005524(ATP binding);GO:0015662(ATPase activity, coupled to transmembrane movement of ions, phosphorylative mechanism	[R] General function prediction only	K01530	-	1299.69	1301.41	738.47	1990.84	1702.07	1752.14	7.01	7.9	5.08	13.4	13.97	12.08	1113.19	1815.02	6.66333	13.15	-0.980747	0.980747	0.00460338	0.0658355	no
comp21247_c0	comp21247_c0_seq1	394	394	-	-	-	-	-	-	209.64	189.89	158.39	73.99	77.51	99	14.62	14.97	14.1	6.44	7.99	8.72	185.973	83.5	14.5633	7.71667	0.916291	0.916291	0.00460806	0.0658477	no
comp19985_c0	comp19985_c0_seq1	2248	2248	Q39033	phospholipase C, delta	GO:0005886(plasma membrane);GO:0005509(calcium ion binding);GO:0004435(phosphatidylinositol phospholipase C activity);GO:0004871(signal transducer activity);GO:0035556(intracellular signal transduction);GO:0016042(lipid catabolic process)	[T] Signal transduction mechanisms	K05857	ko00562(Inositol phosphate metabolism);ko04020(Calcium signaling pathway);ko04070(Phosphatidylinositol signaling system)	4129.21	3685.49	3441.58	2939.74	2343.92	2907.22	42.37	42.78	45.08	37.64	35.57	37.69	3752.09	2730.29	43.41	36.9667	0.231802	0.231802	0.00463732	0.0659557	no
comp17856_c0	comp17856_c0_seq1	1306	1306	O96552	charged multivesicular body protein 1	GO:0010008(endosome membrane);GO:0005770(late endosome);GO:0045324(late endosome to vacuole transport);GO:0006623(protein targeting to vacuole)	[U] Intracellular trafficking, secretion, and vesicular transport	K12197	ko04144(Endocytosis)	7731.34	7547.34	6223.16	2742.75	2899.48	3945.65	140	154.59	143.84	61.97	77.65	90.27	7167.28	3195.96	146.143	76.63	0.931403	0.931403	0.00463483	0.0659557	no
comp7318_c1	comp7318_c1_seq1	1449	1449	O24454	ubiquitin carboxyl-terminal hydrolase 12/46	GO:0005634(nucleus);GO:0008234(cysteine-type peptidase activity);GO:0004221(ubiquitin thiolesterase activity);GO:0006511(ubiquitin-dependent protein catabolic process)	[O] Posttranslational modification, protein turnover, chaperones	K11842	-	1545.82	1432.9	1275.88	1071.77	954.32	1120.99	25.08	26.3	26.42	21.7	22.9	22.98	1418.2	1049.03	25.9333	22.5267	0.203174	0.203174	0.00463632	0.0659557	no
comp16697_c1	comp16697_c1_seq1,comp16697_c1_seq10,comp16697_c1_seq11,comp16697_c1_seq12,comp16697_c1_seq13,comp16697_c1_seq14,comp16697_c1_seq15,comp16697_c1_seq16,comp16697_c1_seq17,comp16697_c1_seq18,comp16697_c1_seq19,comp16697_c1_seq2,comp16697_c1_seq20,comp16697_	2857	2357	Q9LJE4	chaperonin GroEL	-	[O] Posttranslational modification, protein turnover, chaperones	K04077	ko03018(RNA degradation);ko04940(Type I diabetes mellitus)	1205.74	1111.03	917.97	1667.94	1628.12	1727.06	12.27	13.2	11.84	19.73	22.99	21.51	1078.25	1674.37	12.4367	21.41	-0.783685	0.783685	0.0046453	0.0659827	no
comp7446_c0	comp7446_c0_seq1	1927	1927	-	-	-	[R] General function prediction only	-	-	376.91	402.66	312.91	576.64	590.98	624	4.54	5.48	4.81	8.66	10.52	9.49	364.16	597.207	4.94333	9.55667	-0.951023	0.951023	0.00467678	0.06612	no
comp4450_c0	comp4450_c0_seq1,comp4450_c0_seq2	2937	2204.28	Q9QUR6	prolyl oligopeptidase	GO:0005634(nucleus);GO:0004252(serine-type endopeptidase activity);GO:0070008(serine-type exopeptidase activity)	[O] Posttranslational modification, protein turnover, chaperones	K01322	-	2251.84	2054.78	1436.06	3153.33	3260.82	3794.31	38.74	36.78	28.64	58.59	72.25	69.9	1914.23	3402.82	34.72	66.9133	-0.946527	0.946527	0.00467022	0.06612	no
comp5420_c0	comp5420_c0_seq1,comp5420_c0_seq2	1789	1548.09	O04153	calreticulin	GO:0005788(endoplasmic reticulum lumen);GO:0005789(endoplasmic reticulum membrane);GO:0005509(calcium ion binding);GO:0005529(sugar binding);GO:0051082(unfolded protein binding);GO:0046283(anthocyanin metabolic process);GO:0055074(calcium ion homeostasis)	[O] Posttranslational modification, protein turnover, chaperones	K08057	ko04145(Phagosome);ko04612(Antigen processing and presentation);ko05142(Chagas disease)	6904.23	6564.05	6260.8	3599.32	3526.63	4260.13	106.55	110.47	120.43	70.25	78.57	85.39	6576.36	3795.36	112.483	78.07	0.526871	0.526871	0.00467817	0.06612	no
comp12637_c0	comp12637_c0_seq1,comp12637_c0_seq2,comp12637_c0_seq3	1297	1267.44	-	cellular nucleic acid-binding protein	-	-	K09250	-	2328.1	2213.63	2023.76	1475.88	1327.06	1454.01	43.57	46.63	48.07	34.6	38.18	35.02	2188.5	1418.98	46.09	35.9333	0.359131	0.359131	0.00466547	0.06612	no
comp13280_c0	comp13280_c0_seq1,comp13280_c0_seq2,comp13280_c0_seq3,comp13280_c0_seq4,comp13280_c0_seq5,comp13280_c0_seq6,comp13280_c0_seq7,comp13280_c0_seq8	2940	2721.29	Q54V77	CTP synthase	GO:0005524(ATP binding);GO:0003883(CTP synthase activity);GO:0006241(CTP biosynthetic process);GO:0006541(glutamine metabolic process);GO:0008654(phospholipid biosynthetic process);GO:0019856(pyrimidine base biosynthetic process)	[F] Nucleotide transport and metabolism	K01937	ko00240(Pyrimidine metabolism)	1401.53	1218.93	1334.02	1967.62	1604.93	1723	11.84	11.58	14.41	20.49	19.79	18.15	1318.16	1765.18	12.61	19.4767	-0.627179	0.627179	0.00467838	0.06612	no
comp10723_c0	comp10723_c0_seq1,comp10723_c0_seq2	1766	1640.38	Q94JU2	-	-	-	-	-	258.76	217.99	254.76	384.14	291.53	383.02	3.71	3.54	4.62	6.7	6.09	6.84	243.837	352.897	3.95667	6.54333	-0.72574	0.72574	0.00468254	0.0661592	no
comp8940_c0	comp8940_c0_seq1,comp8940_c0_seq2	1445	1427.89	Q499V6	-	GO:0005654(nucleoplasm);GO:0000166(nucleotide binding);GO:0003723(RNA binding);GO:0008270(zinc ion binding);GO:0006397(mRNA processing);GO:0008380(RNA splicing)	[R] General function prediction only	-	-	1115.96	840.72	813.44	594.02	466.43	477.99	18.43	15.72	17.17	12.15	11.33	9.99	923.373	512.813	17.1067	11.1567	0.616653	0.616653	0.00468892	0.0662066	no
comp23949_c0	comp23949_c0_seq1	2057	2057	Q8VZ67	CBF1 interacting corepressor	GO:0003676(nucleic acid binding);GO:0008270(zinc ion binding)	[K] Transcription	K06066	ko04330(Notch signaling pathway)	738	759.02	625.19	889	768.98	804.05	8.3	9.66	8.98	12.48	12.8	11.43	707.403	820.677	8.98	12.2367	-0.446423	0.446423	0.00469239	0.0662183	no
comp14275_c0	comp14275_c0_seq1,comp14275_c0_seq2,comp14275_c0_seq3	1937	1897.13	Q67Y83	serine carboxypeptidase 1	GO:0005576(extracellular region);GO:0004185(serine-type carboxypeptidase activity);GO:0006508(proteolysis)	[O] Posttranslational modification, protein turnover, chaperones	K09646	-	101	99	64.49	142.02	135.22	132	1.22	1.36	1.08	2.2	2.46	2.02	88.1633	136.413	1.22	2.22667	-0.868004	0.868004	0.00469892	0.0662263	no
comp8883_c0	comp8883_c0_seq1	1413	1413	-	-	-	-	-	-	505.41	409	441.99	195	190.91	262	8.42	7.71	9.4	4.05	4.7	5.52	452.133	215.97	8.51	4.75667	0.839208	0.839208	0.00471007	0.0662946	no
comp14825_c0	comp14825_c0_seq1,comp14825_c0_seq2,comp14825_c0_seq3,comp14825_c0_seq4,comp14825_c0_seq5,comp14825_c0_seq6	5181	3149.29	Q9LIH5	-	GO:0003677(DNA binding);GO:0008270(zinc ion binding)	-	-	-	1782.23	1544.87	1296.84	2554.48	2199.01	2227.51	14.12	13.25	12.76	22.69	23.98	20.71	1541.31	2327	13.3767	22.46	-0.747639	0.747639	0.0047231	0.0664196	no
comp4192_c0	comp4192_c0_seq1,comp4192_c0_seq2	1725	1589.77	Q948P6	ferritin heavy chain	GO:0009507(chloroplast);GO:0008199(ferric iron binding);GO:0004322(ferroxidase activity);GO:0006879(cellular iron ion homeostasis);GO:0006826(iron ion transport)	[P] Inorganic ion transport and metabolism	K00522	ko00860(Porphyrin and chlorophyll metabolism)	15979.6	12694.7	11671.5	6901.46	5921.12	6797.78	235.11	212.22	218.36	136.17	139.41	134.33	13448.6	6540.12	221.897	136.637	0.699543	0.699543	0.00473078	0.0664886	no
comp12641_c0	comp12641_c0_seq1,comp12641_c0_seq2,comp12641_c0_seq3,comp12641_c0_seq4	2279	2017.44	-	-	-	[I] Lipid transport and metabolism	-	-	1514.21	1459.4	1485.14	2268.55	1640.54	1952.11	18.15	19.81	22.66	33.11	28.86	29.93	1486.25	1953.73	20.2067	30.6333	-0.600271	0.600271	0.00473934	0.0664895	no
comp13277_c0	comp13277_c0_seq1,comp13277_c0_seq2,comp13277_c0_seq3	3609	3148.92	C0LGK4	-	GO:0016021(integral to membrane);GO:0009505(plant-type cell wall);GO:0005886(plasma membrane);GO:0009506(plasmodesma);GO:0005524(ATP binding);GO:0004674(protein serine/threonine kinase activity);GO:0004872(receptor activity)	-	K00924	-	2420.78	1767.95	1637.54	2898.78	2942.54	3217.01	17.92	14.6	15.35	27.47	33.37	29.39	1942.09	3019.44	15.9567	30.0767	-0.914485	0.914485	0.00474193	0.0664895	no
comp19342_c0	comp19342_c0_seq1	4195	4195	O13816	cohesin complex subunit SA-1/2	GO:0000775(chromosome, centromeric region);GO:0000794(condensed nuclear chromosome);GO:0030892(mitotic cohesin complex);GO:0005488(binding);GO:0051301(cell division);GO:0007064(mitotic sister chromatid cohesion)	[D] Cell cycle control, cell division, chromosome partitioning	K06671	ko04110(Cell cycle);ko04111(Cell cycle - yeast);ko04113(Meiosis - yeast)	3564.71	3314.23	2968.47	4623.19	3740.62	4078.98	19.3	20.29	20.51	31.23	29.95	27.9	3282.47	4147.6	20.0333	29.6933	-0.567737	0.567737	0.0047497	0.0665013	no
comp19784_c0	comp19784_c0_seq1	1421	1421	Q9SEU4	-	-	[R] General function prediction only	-	-	2393.63	2010.09	2078.36	1125.27	1145.5	1323.02	39.64	37.66	43.94	23.26	28.06	27.69	2160.69	1197.93	40.4133	26.3367	0.617759	0.617759	0.00474606	0.0665013	no
comp20915_c0	comp20915_c0_seq1	1138	1138	-	-	-	-	-	-	725.69	550.25	557.01	354	260.94	349.21	15.22	13.05	14.91	9.26	8.09	9.25	610.983	321.383	14.3933	8.86667	0.698937	0.698937	0.00474736	0.0665013	no
comp11015_c0	comp11015_c0_seq1,comp11015_c0_seq2	3092	2939.25	Q9LM55	-	-	[R] General function prediction only	-	-	4699.1	4217.71	3905.19	4786.15	3994.7	5046.93	36.69	37.27	38.91	46.19	45.79	49.47	4274	4609.26	37.6233	47.15	-0.32563	0.32563	0.00474966	0.0665013	no
comp26021_c0	comp26021_c0_seq1	2750	2750	O49289	-	GO:0005634(nucleus);GO:0005524(ATP binding);GO:0008026(ATP-dependent helicase activity);GO:0003723(RNA binding)	[A] RNA processing and modification	K01529	-	779.05	605.36	590.1	1135.44	982.42	980.12	6.49	5.71	6.28	11.81	12.11	10.32	658.17	1032.66	6.16	11.4133	-0.889718	0.889718	0.00475847	0.066566	no
comp4178_c0	comp4178_c0_seq1	1819	1819	Q5QMM3	-	GO:0005634(nucleus);GO:0043565(sequence-specific DNA binding);GO:0003700(sequence-specific DNA binding transcription factor activity);GO:0007275(multicellular organismal development)	-	-	-	26850	21836.2	22621.5	12765.5	12104	14730	343.27	315.77	369.16	203.64	228.87	237.94	23769.2	13199.9	342.733	223.483	0.616919	0.616919	0.00475664	0.066566	no
comp12547_c0	comp12547_c0_seq1,comp12547_c0_seq2,comp12547_c0_seq3,comp12547_c0_seq4	1188	931.83	-	-	-	-	-	-	1290.95	1032.16	1107.2	468.37	564.55	594.94	34.5	30.46	37.61	14.47	20.97	18.9	1143.44	542.62	34.19	18.1133	0.916522	0.916522	0.00477028	0.0666373	no
comp24844_c0	comp24844_c0_seq1	2049	2049	Q940Q8	-	GO:0000139(Golgi membrane);GO:0016021(integral to membrane);GO:0080116(glucuronoxylan glucuronosyltransferase activity);GO:0007047(cellular cell wall organization);GO:0010417(glucuronoxylan biosynthetic process);GO:0009834(secondary cell wall biogenesis)	[G] Carbohydrate transport and metabolism ;[M] Cell wall/membrane/envelope biogenesis ;[W] Extracellular structures	-	-	1310.78	1325.69	1070.41	697.46	674.11	815.2	14.81	16.94	15.43	9.83	11.26	11.63	1235.63	728.923	15.7267	10.9067	0.528003	0.528003	0.00479886	0.0668387	no
comp17467_c1	comp17467_c1_seq1	1618	1618	-	-	-	-	-	-	7487.4	5844.97	6551.96	10038.1	8738.13	10362.5	108.19	95.53	120.84	180.98	186.73	189.18	6628.11	9712.91	108.187	185.63	-0.778907	0.778907	0.00482443	0.0670506	no
comp12246_c1	comp12246_c1_seq1,comp12246_c1_seq2	2577	1691.57	Q04088	-	GO:0005634(nucleus);GO:0046983(protein dimerization activity);GO:0043565(sequence-specific DNA binding);GO:0003700(sequence-specific DNA binding transcription factor activity)	-	-	-	1049.97	1092	796.97	1809.22	1422.41	1577.95	14.55	18.16	14.61	28.09	27.6	26.49	979.647	1603.19	15.7733	27.3933	-0.796337	0.796337	0.00482353	0.0670506	no
comp12114_c0	comp12114_c0_seq1,comp12114_c0_seq2,comp12114_c0_seq3,comp12114_c0_seq4	2192	2103.48	-	-	-	-	-	-	1382.8	1079.36	1186.77	2008.86	1727.96	2008	15.23	13.43	16.75	27.54	28.05	27.85	1216.31	1914.94	15.1367	27.8133	-0.877729	0.877729	0.00484484	0.0671285	no
comp15201_c0	comp15201_c0_seq1,comp15201_c0_seq2,comp15201_c0_seq3,comp15201_c0_seq4	953	818.04	-	-	-	-	-	-	1197.66	1052.14	1064.24	545.92	451.13	586.91	36.45	35.91	41.33	20.24	19.94	22.02	1104.68	527.987	37.8967	20.7333	0.870119	0.870119	0.00486666	0.0671915	no
comp10137_c0	comp10137_c0_seq1,comp10137_c0_seq2,comp10137_c0_seq3,comp10137_c0_seq4	1549	1374.28	C7YTL6	-	GO:0005730(nucleolus);GO:0030529(ribonucleoprotein complex);GO:0006364(rRNA processing)	[S] Function unknown	-	-	379.66	343	284.45	404.49	375.57	427	6.62	6.22	6.25	8.33	9.28	8.93	335.703	402.353	6.36333	8.84667	-0.475351	0.475351	0.00486608	0.0671915	no
comp8790_c0	comp8790_c0_seq1,comp8790_c0_seq2	1745	1487.26	Q9SUG3	inositol-1,3,4-trisphosphate 5/6-kinase	GO:0005737(cytoplasm);GO:0005634(nucleus);GO:0005524(ATP binding);GO:0047325(inositol tetrakisphosphate 1-kinase activity);GO:0052726(inositol-1,3,4-trisphosphate 5-kinase activity);GO:0035300(inositol-1,3,4-trisphosphate 5/6-kinase activity);GO:0052725(i	-	K01765	-	1409.39	1599.39	1063.85	1783.7	1741.7	1925	25.34	30.37	24.14	38.99	46.32	44.03	1357.54	1816.8	26.6167	43.1133	-0.695804	0.695804	0.00485937	0.0671915	no
comp207112_c0	comp207112_c0_seq1	238	238	-	-	-	-	-	-	4	4.01	4	7	6	7	0.54	0.62	0.69	1.19	1.21	1.2	4.00333	6.66667	0.616667	1.2	-0.960472	0.960472	0.00485449	0.0671915	no
comp20643_c0	comp20643_c0_seq1	2061	2061	B9DFS6	-	-	[U] Intracellular trafficking, secretion, and vesicular transport	-	-	2193.9	1999.06	1441.03	2576.43	1945.97	2495.03	24.63	25.39	20.65	36.1	32.31	35.39	1878	2339.14	23.5567	34.6	-0.554637	0.554637	0.00487039	0.0671915	no
comp19567_c0	comp19567_c0_seq1	4957	4957	Q8RWY6	-	-	[R] General function prediction only	-	-	3918.71	3227.03	3421.62	5697.57	5252.58	6822.61	17.9	16.68	19.95	32.48	35.49	39.38	3522.45	5924.25	18.1767	35.7833	-0.9772	0.9772	0.00486923	0.0671915	no
comp43767_c0	comp43767_c0_seq1	1631	1631	-	-	-	-	-	-	345.08	291.21	283	190.69	176	220	4.94	4.72	5.18	3.41	3.73	3.98	306.43	195.563	4.94667	3.70667	0.416334	0.416334	0.004873	0.0671969	no
comp14648_c0	comp14648_c0_seq1,comp14648_c0_seq2,comp14648_c0_seq3,comp14648_c0_seq4,comp14648_c0_seq5,comp14648_c0_seq6,comp14648_c0_seq7,comp14648_c0_seq8,comp14648_c0_seq9	1501	1098.69	Q9C8P8	-	GO:0005634(nucleus);GO:0003677(DNA binding);GO:0006355(regulation of transcription, DNA-dependent);GO:0006351(transcription, DNA-dependent)	-	-	-	545	451.41	338.93	772.89	650.8	768.03	12.3	11.27	9.54	21.79	22.12	21.87	445.113	730.573	11.0367	21.9267	-0.990382	0.990382	0.00489059	0.0672382	no
comp7936_c0	comp7936_c0_seq1,comp7936_c0_seq2	1153	917.29	Q94A65	-	-	-	-	-	723.99	794.44	706.95	1358.35	952.5	1278.42	19.62	23.95	24.91	47.91	38.86	45.16	741.793	1196.42	22.8267	43.9767	-0.946018	0.946018	0.00488789	0.0672382	no
comp7065_c0	comp7065_c0_seq1,comp7065_c0_seq2	2064	2036.08	-	-	-	[O] Posttranslational modification, protein turnover, chaperones	K00924	-	450.12	501.09	430.62	618.19	570.82	652	5.12	6.45	6.25	8.76	9.59	9.35	460.61	613.67	5.94	9.23333	-0.636389	0.636389	0.00488827	0.0672382	no
comp7569_c0	comp7569_c0_seq1,comp7569_c0_seq2	3393	2437.37	P43298	-	GO:0016021(integral to membrane);GO:0005886(plasma membrane);GO:0005524(ATP binding);GO:0004675(transmembrane receptor protein serine/threonine kinase activity)	-	K00924	-	3116.15	2701.07	2062.76	4942.37	4335.17	4038.11	32.64	35.89	25.92	57.81	64.95	52.58	2626.66	4438.55	31.4833	58.4467	-0.892532	0.892532	0.00488371	0.0672382	no
comp5317_c0	comp5317_c0_seq1,comp5317_c0_seq2	1981	1105.92	-	-	-	-	-	-	1185.08	1003.77	944.86	915.48	755.64	772	33.29	29.6	34.1	20.83	22.7	20	1044.57	814.373	32.33	21.1767	0.610398	0.610398	0.00489592	0.0672775	no
comp44303_c0	comp44303_c0_seq1	778	778	Q8RB59	small subunit ribosomal protein S21	GO:0005840(ribosome);GO:0003735(structural constituent of ribosome);GO:0006412(translation)	-	K02970	ko03010(Ribosome)	259.51	224.01	172.41	108.09	109.87	90	8.22	8.03	6.97	4.27	5.15	3.6	218.643	102.653	7.74	4.34	0.834639	0.834639	0.00489625	0.0672775	no
comp15912_c0	comp15912_c0_seq1,comp15912_c0_seq10,comp15912_c0_seq11,comp15912_c0_seq2,comp15912_c0_seq3,comp15912_c0_seq4,comp15912_c0_seq5,comp15912_c0_seq6,comp15912_c0_seq7,comp15912_c0_seq8,comp15912_c0_seq9	3122	2319.55	Q8GW57	-	GO:0005739(mitochondrion)	[R] General function prediction only	-	-	196.06	236	207	359.9	382.54	370.63	2.1	2.63	2.81	4.41	5.31	4.45	213.02	371.023	2.51333	4.72333	-0.910203	0.910203	0.00491937	0.0673233	no
comp5160_c0	comp5160_c0_seq1	2206	2206	-	-	-	-	-	-	1101.63	936.43	970.76	1451.37	1247	1438.71	11.53	11.08	12.97	18.95	19.3	19.02	1002.94	1379.03	11.86	19.09	-0.686713	0.686713	0.00490755	0.0673233	no
comp36222_c0	comp36222_c0_seq1	1269	1269	-	-	-	-	-	-	153	162	105.98	219	230	237	2.86	3.42	2.53	5.1	6.35	5.59	140.327	228.667	2.93667	5.68	-0.951711	0.951711	0.00492232	0.0673233	no
comp13128_c0	comp13128_c0_seq1,comp13128_c0_seq2	1710	1536.54	-	translation initiation factor eIF-3 subunit P62	-	[J] Translation, ribosomal structure and biogenesis	K03256	-	359.53	397.66	277	653.19	475.76	573	5.75	7.13	5.84	13.37	10.83	11.93	344.73	567.317	6.24	12.0433	-0.948617	0.948617	0.00490867	0.0673233	no
comp25796_c0	comp25796_c0_seq1	2025	2025	-	-	-	-	-	-	440.2	454.31	394.3	615.91	474.99	527.04	5.03	5.88	5.76	8.79	8.03	7.61	429.603	539.313	5.55667	8.14333	-0.5514	0.5514	0.00492483	0.0673233	no
comp2754_c0	comp2754_c0_seq1	1191	1191	Q9XI96	-	GO:0016021(integral to membrane);GO:0005886(plasma membrane);GO:0005524(ATP binding);GO:0004674(protein serine/threonine kinase activity);GO:0004872(receptor activity)	[T] Signal transduction mechanisms	K00924	-	242.46	257	162.95	323	314.01	328	4.84	5.81	4.15	8.05	9.28	8.28	220.803	321.67	4.93333	8.53667	-0.79111	0.79111	0.00493551	0.0673585	no
comp9927_c0	comp9927_c0_seq1,comp9927_c0_seq2,comp9927_c0_seq3,comp9927_c0_seq4,comp9927_c0_seq5,comp9927_c0_seq6,comp9927_c0_seq7	2828	2500.41	-	-	-	-	-	-	1032.47	1015.03	706.66	1673.03	1232.56	1261.11	9.44	10.75	8.36	19.35	17	15.84	918.053	1388.9	9.51667	17.3967	-0.870283	0.870283	0.00494917	0.0674256	no
comp3946_c0	comp3946_c0_seq1,comp3946_c0_seq2	3240	3227.49	Q8RVQ5	-	GO:0000145(exocyst);GO:0005886(plasma membrane);GO:0009506(plasmodesma);GO:0006887(exocytosis);GO:0015031(protein transport);GO:0048278(vesicle docking)	-	-	-	1686.79	1613.67	1356.98	2766.9	2037.64	2447.32	11.94	12.92	12.24	24.36	21.3	21.88	1552.48	2417.29	12.3667	22.5133	-0.864323	0.864323	0.00496587	0.0675469	no
comp15224_c0	comp15224_c0_seq1,comp15224_c0_seq2,comp15224_c0_seq3,comp15224_c0_seq4,comp15224_c0_seq5,comp15224_c0_seq6,comp15224_c0_seq7,comp15224_c0_seq8,comp15224_c0_seq9	1986	1450.16	O48651	squalene monooxygenase	GO:0016021(integral to membrane);GO:0050660(flavin adenine dinucleotide binding);GO:0004506(squalene monooxygenase activity)	[I] Lipid transport and metabolism	K00511	ko00100(Steroid biosynthesis)	169	184	160	326.71	273	281	2.96	3.36	3.44	6.86	6.84	5.8	171	293.57	3.25333	6.5	-0.998521	0.998521	0.00500429	0.067677	no
comp16542_c0	comp16542_c0_seq1,comp16542_c0_seq2,comp16542_c0_seq3	1511	1175.77	Q8H1Q2	ATP-binding protein involved in chromosome partitioning	-	[D] Cell cycle control, cell division, chromosome partitioning	K03593	-	5359.64	4450.19	4393.5	3798.69	2981.47	3540.07	117.23	112.47	124.65	95.48	87.79	89.68	4734.44	3440.08	118.117	90.9833	0.376538	0.376538	0.00500423	0.067677	no
comp13302_c0	comp13302_c0_seq1,comp13302_c0_seq2,comp13302_c0_seq3	2787	2367.93	C0LGK9	-	GO:0016021(integral to membrane);GO:0005524(ATP binding);GO:0004674(protein serine/threonine kinase activity);GO:0004872(receptor activity)	-	K00924	-	1135.76	898.13	832.45	1179.86	1076.02	1170.04	12.04	10.9	11.5	14.73	16.27	14.83	955.447	1141.97	11.48	15.2767	-0.412207	0.412207	0.00499721	0.067677	no
comp17089_c0	comp17089_c0_seq1	1445	1445	Q9FVI1	cofilin	GO:0005622(intracellular);GO:0003779(actin binding)	[Z] Cytoskeleton	K05765	ko04360(Axon guidance);ko04666(Fc gamma R-mediated phagocytosis);ko04810(Regulation of actin cytoskeleton)	39017.9	40111.8	36795.2	17816.6	16614.9	21588.7	634.91	738.28	764.27	361.75	399.86	443.86	38641.6	18673.4	712.487	401.823	0.826302	0.826302	0.0050162	0.0677809	no
comp3981_c0	comp3981_c0_seq1	302	302	Q9FDW1	myb proto-oncogene protein, plant	GO:0005634(nucleus);GO:0003677(DNA binding);GO:0009738(abscisic acid mediated signaling pathway);GO:0006355(regulation of transcription, DNA-dependent);GO:0009733(response to auxin stimulus);GO:0046686(response to cadmium ion);GO:0010200(response to chiti	[K] Transcription	K09422	-	149.17	148.74	140.05	227.19	164.76	197.54	14.6	16.46	17.49	27.74	23.84	24.42	145.987	196.497	16.1833	25.3333	-0.646528	0.646528	0.00502512	0.0678255	no
comp18792_c0	comp18792_c0_seq1	4326	4326	P28737	adenosinetriphosphatase	GO:0016021(integral to membrane);GO:0005741(mitochondrial outer membrane);GO:0005524(ATP binding);GO:0017111(nucleoside-triphosphatase activity);GO:0006626(protein targeting to mitochondrion)	[O] Posttranslational modification, protein turnover, chaperones	K01509	ko00230(Purine metabolism)	3898.35	3258.42	3348.66	6391.08	4587.38	5504.76	20.45	19.34	22.43	41.84	35.6	36.49	3501.81	5494.41	20.74	37.9767	-0.872697	0.872697	0.00502791	0.0678436	no
comp23259_c0	comp23259_c0_seq1	250	250	O94906	-	-	[A] RNA processing and modification	-	-	176.16	122.54	129.6	190.53	192.97	213.34	22.33	17.57	20.97	30.14	36.18	34.17	142.767	198.947	20.29	33.4967	-0.723249	0.723249	0.00505097	0.0680131	no
comp17090_c0	comp17090_c0_seq1	1963	1963	O23255	adenosylhomocysteinase	GO:0005829(cytosol);GO:0005886(plasma membrane);GO:0009506(plasmodesma);GO:0005774(vacuolar membrane);GO:0004013(adenosylhomocysteinase activity);GO:0005507(copper ion binding);GO:0009793(embryo development ending in seed dormancy);GO:0006346(methylation-	[H] Coenzyme transport and metabolism	K01251	ko00270(Cysteine and methionine metabolism);ko00450(Selenoamino acid metabolism)	59825.5	47561.3	49339.5	22502.2	23382.5	31328.6	706.54	635.35	743.79	331.61	408.42	467.48	52242.1	25737.8	695.227	402.503	0.788483	0.788483	0.00505181	0.0680131	no
comp13369_c0	comp13369_c0_seq1,comp13369_c0_seq2,comp13369_c0_seq3,comp13369_c0_seq4,comp13369_c0_seq5,comp13369_c0_seq6	2521	2292.06	-	-	-	[Z] Cytoskeleton	-	-	442.86	462.88	320.01	571.91	495.7	559	4.44	5.19	4.01	7.58	7.6	7.05	408.583	542.203	4.54667	7.41	-0.704664	0.704664	0.00509112	0.0680716	no
comp24799_c0	comp24799_c0_seq1	2879	2879	Q9T0G7	euchromatic histone-lysine N-methyltransferase	GO:0000775(chromosome, centromeric region);GO:0005634(nucleus);GO:0042393(histone binding);GO:0018024(histone-lysine N-methyltransferase activity);GO:0008270(zinc ion binding);GO:0009294(DNA mediated transformation)	[B] Chromatin structure and dynamics ;[K] Transcription	K11420	ko00310(Lysine degradation)	887.5	776.39	724.33	1054.07	997.82	1109.3	7.06	6.98	7.35	10.46	11.74	11.15	796.073	1053.73	7.13	11.1167	-0.64075	0.64075	0.00508326	0.0680716	no
comp16578_c1	comp16578_c1_seq1,comp16578_c1_seq10,comp16578_c1_seq11,comp16578_c1_seq12,comp16578_c1_seq13,comp16578_c1_seq14,comp16578_c1_seq15,comp16578_c1_seq16,comp16578_c1_seq17,comp16578_c1_seq18,comp16578_c1_seq19,comp16578_c1_seq2,comp16578_c1_seq20,comp16578_	5605	4267.76	-	-	-	-	-	-	2212.74	1762.54	1659.43	2759.28	2851.14	3028.59	11.11	9.22	10.06	17.61	21.44	19.7	1878.24	2879.67	10.13	19.5833	-0.950992	0.950992	0.00508163	0.0680716	no
comp4717_c0	comp4717_c0_seq1	1232	1232	-	-	-	[R] General function prediction only	-	-	936.45	903.34	713.48	528.1	446.01	562.96	18.04	19.68	17.55	12.7	12.71	13.7	851.09	512.357	18.4233	13.0367	0.498959	0.498959	0.00508579	0.0680716	no
comp13802_c0	comp13802_c0_seq1,comp13802_c0_seq2,comp13802_c0_seq3,comp13802_c0_seq4	2096	1895.58	Q39635	-	GO:0004519(endonuclease activity);GO:0003676(nucleic acid binding)	-	-	-	2018.22	1935.26	1638.28	1039.17	915.14	1207.69	24.93	26.74	25.27	15.46	16.53	19	1863.92	1054	25.6467	16.9967	0.593519	0.593519	0.00508604	0.0680716	no
comp13165_c0	comp13165_c0_seq1,comp13165_c0_seq2,comp13165_c0_seq3	1605	1350.43	Q9SVU4	-	-	-	-	-	1303.09	1389.45	1034.41	1479.27	1436.39	1458	21.96	26.89	21.76	34.48	38.78	34.82	1242.32	1457.89	23.5367	36.0267	-0.614155	0.614155	0.00506938	0.0680716	no
comp18180_c0	comp18180_c0_seq1	3616	3616	B9S2H4	-	GO:0016021(integral to membrane)	-	-	-	7197.29	5629.37	5026.09	8913.82	6481.25	7951.42	45.33	40.11	40.41	70.06	60.38	63.28	5950.92	7782.16	41.95	64.5733	-0.622268	0.622268	0.00507277	0.0680716	no
comp22966_c0	comp22966_c0_seq1	3362	3362	Q9FWR2	inorganic pyrophosphatase	GO:0000139(Golgi membrane);GO:0016021(integral to membrane);GO:0005773(vacuole);GO:0009678(hydrogen-translocating pyrophosphatase activity);GO:0004427(inorganic diphosphatase activity);GO:0015992(proton transport)	-	K01507	ko00190(Oxidative phosphorylation)	2162.23	1977.46	1828.03	2243.63	2073.93	2245.39	14.67	15.18	15.83	19	20.81	19.25	1989.24	2187.65	15.2267	19.6867	-0.370619	0.370619	0.0050676	0.0680716	no
comp29057_c0	comp29057_c0_seq1	1032	1032	Q94K18	-	GO:0016021(integral to membrane)	[U] Intracellular trafficking, secretion, and vesicular transport	-	-	450.09	392.29	395	206.94	226.98	237.98	10.48	10.33	11.74	6.01	7.82	7	412.46	223.967	10.85	6.94333	0.643995	0.643995	0.00511007	0.0681475	no
comp13086_c0	comp13086_c0_seq1,comp13086_c0_seq2,comp13086_c0_seq3,comp13086_c0_seq4	1634	1509.3	-	-	-	-	-	-	315.41	244.96	226.77	344.87	326.71	386	4.95	4.36	4.6	6.51	7.5	7.35	262.38	352.527	4.63667	7.12	-0.618789	0.618789	0.00511222	0.0681572	no
comp15908_c0	comp15908_c0_seq1,comp15908_c0_seq2,comp15908_c0_seq3,comp15908_c0_seq4,comp15908_c0_seq5,comp15908_c0_seq6,comp15908_c0_seq7	2166	1183.07	-	-	-	-	-	-	591.02	479.65	440	728.96	718	719.13	7.54	8.06	9.6	16.1	18.04	14.55	503.557	722.03	8.4	16.23	-0.950202	0.950202	0.0051196	0.0682366	no
comp10233_c0	comp10233_c0_seq1,comp10233_c0_seq2,comp10233_c0_seq3	2212	1475.77	Q8VYN2	-	GO:0005886(plasma membrane);GO:0005198(structural molecule activity)	[U] Intracellular trafficking, secretion, and vesicular transport	-	-	3619.36	3516.37	2452.22	4492.81	3943.83	4099.02	58.06	62.84	50.3	83.93	89.78	79.08	3195.98	4178.55	57.0667	84.2633	-0.562257	0.562257	0.00513808	0.068388	no
comp23723_c0	comp23723_c0_seq1	1103	1103	-	-	-	-	-	-	913.9	761.76	791.4	379.93	378.81	510	19.81	18.68	21.9	10.28	12.15	13.97	822.353	422.913	20.13	12.1333	0.730371	0.730371	0.00514524	0.0684322	no
comp17311_c0	comp17311_c0_seq1	1151	1151	Q94A20	-	GO:0016021(integral to membrane)	[T] Signal transduction mechanisms	K06890	-	16336.5	13265.5	12986.8	5977.13	5570.58	8270.01	338.4	310.81	343.38	154.49	170.66	216.44	14196.3	6605.91	330.863	180.53	0.873997	0.873997	0.00515481	0.0684322	no
comp2542_c0	comp2542_c0_seq1,comp2542_c0_seq2	1823	1813.75	Q5ZMS6	-	GO:0005737(cytoplasm);GO:0005634(nucleus);GO:0003682(chromatin binding);GO:0035064(methylated histone residue binding);GO:0003723(RNA binding);GO:0003713(transcription coactivator activity);GO:0016568(chromatin modification);GO:0006397(mRNA processing)	[S] Function unknown	-	-	358.02	374	256	439.7	395.61	511	4.6	5.43	4.19	7.03	7.5	8.28	329.34	448.77	4.74	7.60333	-0.681745	0.681745	0.00514776	0.0684322	no
comp3181_c0	comp3181_c0_seq1,comp3181_c0_seq2	2111	2007.25	Q9LS46	-	GO:0016021(integral to membrane);GO:0009705(plant-type vacuole membrane);GO:0005253(anion channel activity);GO:0015743(malate transport);GO:0010044(response to aluminum ion)	[R] General function prediction only	-	-	459.98	440.2	342	191.48	154	216	5.44	5.88	4.78	2.62	2.49	3.04	414.06	187.16	5.36667	2.71667	0.982189	0.982189	0.00515851	0.0684322	no
comp23586_c0	comp23586_c0_seq1	2630	2630	O60508	Ca2+/calmodulin-dependent protein kinase	GO:0071013(catalytic step 2 spliceosome);GO:0005654(nucleoplasm);GO:0031124(mRNA 3'-end processing);GO:0006406(mRNA export from nucleus);GO:0000398(nuclear mRNA splicing, via spliceosome);GO:0006369(termination of RNA polymerase II transcription)	[S] Function unknown	K00908	-	1277.26	1003.21	974.68	1237.3	1177.15	1293.04	11.15	9.9	10.86	13.48	15.2	14.26	1085.05	1235.83	10.6367	14.3133	-0.428314	0.428314	0.00515829	0.0684322	no
comp14853_c0	comp14853_c0_seq1,comp14853_c0_seq10,comp14853_c0_seq11,comp14853_c0_seq12,comp14853_c0_seq2,comp14853_c0_seq3,comp14853_c0_seq4,comp14853_c0_seq5,comp14853_c0_seq6,comp14853_c0_seq7,comp14853_c0_seq8,comp14853_c0_seq9	3936	2942.87	Q5XI69	adenosinetriphosphatase	GO:0005524(ATP binding);GO:0008026(ATP-dependent helicase activity);GO:0003676(nucleic acid binding)	[A] RNA processing and modification	K01509	ko00230(Purine metabolism)	522.85	578.91	377.49	880.99	720.6	763.96	4.24	5.39	4.06	8.02	7.91	6.99	493.083	788.517	4.56333	7.64	-0.743485	0.743485	0.0051681	0.0685106	no
comp3997_c0	comp3997_c0_seq1,comp3997_c0_seq2	2716	2606.29	P51820	thymidylate synthase	GO:0004146(dihydrofolate reductase activity);GO:0004799(thymidylate synthase activity);GO:0006231(dTMP biosynthetic process);GO:0006545(glycine biosynthetic process)	[F] Nucleotide transport and metabolism	K00560	ko00240(Pyrimidine metabolism);ko00670(One carbon pool by folate)	857.9	829.83	625.75	885.01	820.32	924.5	7.56	8.26	7.03	9.74	10.69	10.31	771.16	876.61	7.61667	10.2467	-0.427923	0.427923	0.00517321	0.0685515	no
comp10519_c0	comp10519_c0_seq1,comp10519_c0_seq2	3215	3203.37	Q9ERA6	-	GO:0005737(cytoplasm);GO:0005578(proteinaceous extracellular matrix);GO:0003677(DNA binding);GO:0005515(protein binding);GO:0003700(sequence-specific DNA binding transcription factor activity);GO:0031214(biomineral tissue development);GO:0030154(cell diff	[A] RNA processing and modification	-	-	713.86	674.94	488.27	961.06	695.64	948.36	5.11	5.43	4.46	8.58	7.31	8.56	625.69	868.353	5	8.15	-0.704872	0.704872	0.00518148	0.0685815	no
comp7087_c0	comp7087_c0_seq1,comp7087_c0_seq2	3098	3026.24	-	-	-	-	-	-	1586.98	1664.84	1321.04	1903.7	1570.57	1977.78	12.02	14.26	12.77	17.95	17.55	18.89	1524.29	1817.35	13.0167	18.13	-0.478019	0.478019	0.00518262	0.0685815	no
comp17168_c0	comp17168_c0_seq1	1715	1715	P43296	-	GO:0005634(nucleus);GO:0005773(vacuole);GO:0004197(cysteine-type endopeptidase activity);GO:0042742(defense response to bacterium);GO:0006508(proteolysis);GO:0009651(response to salt stress)	[O] Posttranslational modification, protein turnover, chaperones	K01376	-	31089.3	27578.5	23211.2	14509.5	9958.61	15243.7	422.66	424.08	402.79	246.13	200.23	261.84	27293	13237.3	416.51	236.067	0.819157	0.819157	0.00519191	0.0686477	no
comp18255_c0	comp18255_c0_seq1	876	876	Q9FJP3	large subunit ribosomal protein L29	GO:0009941(chloroplast envelope);GO:0009570(chloroplast stroma);GO:0009295(nucleoid);GO:0005840(ribosome);GO:0003735(structural constituent of ribosome);GO:0006412(translation)	[J] Translation, ribosomal structure and biogenesis	K02904	ko03010(Ribosome)	1772.09	1500.91	1555.94	630.27	795.17	793.27	49.29	47.22	55.25	21.88	32.71	27.88	1609.65	739.57	50.5867	27.49	0.87985	0.87985	0.00520073	0.0686705	no
comp18006_c0	comp18006_c0_seq1	1025	1025	Q54YS0	-	GO:0003677(DNA binding)	[D] Cell cycle control, cell division, chromosome partitioning	K06875	-	7188.88	5949.54	5829.95	2600.81	2768.65	3616.43	168.64	157.87	174.57	76.13	96.06	107.19	6322.79	2995.3	167.027	93.1267	0.842812	0.842812	0.00519813	0.0686705	no
comp20809_c0	comp20809_c0_seq1	805	805	Q9LQY3	-	-	[U] Intracellular trafficking, secretion, and vesicular transport	-	-	2098.01	1696.68	1644.9	687.98	786.14	977.88	64.03	58.57	64.08	26.2	35.48	37.71	1813.2	817.333	62.2267	33.13	0.909395	0.909395	0.00522583	0.0688192	no
comp13495_c0	comp13495_c0_seq1,comp13495_c0_seq2,comp13495_c0_seq3,comp13495_c0_seq4,comp13495_c0_seq5,comp13495_c0_seq6	1685	1492.08	-	-	-	[R] General function prediction only	-	-	275.22	237	231	360	352.34	412.21	4.29	4.35	4.89	7.32	8.49	8.63	247.74	374.85	4.51	8.14667	-0.853082	0.853082	0.0052353	0.0688192	no
comp16873_c1	comp16873_c1_seq1,comp16873_c1_seq10,comp16873_c1_seq11,comp16873_c1_seq12,comp16873_c1_seq13,comp16873_c1_seq14,comp16873_c1_seq15,comp16873_c1_seq16,comp16873_c1_seq17,comp16873_c1_seq18,comp16873_c1_seq19,comp16873_c1_seq2,comp16873_c1_seq20,comp16873_	4697	2096.74	Q8RY22	-	GO:0009507(chloroplast);GO:0005829(cytosol);GO:0004252(serine-type endopeptidase activity);GO:0010205(photoinhibition);GO:0006508(proteolysis)	[R] General function prediction only	-	-	1438.01	1318.51	1248.65	2494.39	2650.79	2893.85	21.46	21.57	22.4	38.98	44.59	42.15	1335.06	2679.68	21.81	41.9067	-0.94219	0.94219	0.00522981	0.0688192	no
comp12703_c0	comp12703_c0_seq1,comp12703_c0_seq2	3436	3323.79	Q69ZF3	beta-glucosidase	GO:0016021(integral to membrane);GO:0005886(plasma membrane);GO:0008422(beta-glucosidase activity);GO:0004348(glucosylceramidase activity);GO:0006680(glucosylceramide catabolic process)	[G] Carbohydrate transport and metabolism	K01188	ko00460(Cyanoamino acid metabolism);ko00500(Starch and sucrose metabolism);ko00940(Phenylpropanoid biosynthesis)	926.03	872.16	688.21	1222.22	901.6	1199.04	6.37	6.79	6.05	10.45	9.13	10.37	828.8	1107.62	6.40333	9.98333	-0.640698	0.640698	0.00524775	0.0689113	no
comp6091_c0	comp6091_c0_seq1,comp6091_c0_seq2	1136	1049.59	-	-	-	[S] Function unknown	-	-	2006.31	1850.7	1753.93	975.38	1059.7	1127	46.29	48.26	51.64	27.83	35.59	32.47	1870.31	1054.03	48.73	31.9633	0.608392	0.608392	0.00525353	0.068925	no
comp9863_c0	comp9863_c0_seq1,comp9863_c0_seq2	2462	2450.12	C0LGD7	interleukin-1 receptor-associated kinase 4	GO:0016021(integral to membrane);GO:0005886(plasma membrane);GO:0005524(ATP binding);GO:0004674(protein serine/threonine kinase activity);GO:0004872(receptor activity)	-	K04733	ko04210(Apoptosis);ko04620(Toll-like receptor signaling pathway);ko04722(Neurotrophin signaling pathway);ko05140(Leishmaniasis);ko05142(Chagas disease)	309.95	378	304	649.53	486	511.73	2.91	4.02	3.65	7.61	6.75	6.07	330.65	549.087	3.52667	6.81	-0.94935	0.94935	0.00526993	0.0689385	no
comp10794_c0	comp10794_c0_seq1,comp10794_c0_seq2	1422	1372.41	-	-	-	-	K00599	ko00340(Histidine metabolism);ko00350(Tyrosine metabolism);ko00450(Selenoamino acid metabolism);ko00626(Naphthalene and anthracene degradation)	666.89	660.51	544.38	272.98	310.8	326	11.19	12.92	11.87	6.1	8.3	7.46	623.927	303.26	11.9933	7.28667	0.718902	0.718902	0.00527258	0.0689406	no
comp2508_c0	comp2508_c0_seq1	1420	1420	Q8RXW0	rhomboid domain-containing protein 1	GO:0016021(integral to membrane);GO:0005622(intracellular);GO:0005886(plasma membrane);GO:0004252(serine-type endopeptidase activity);GO:0008270(zinc ion binding)	[S] Function unknown	K09651	-	351.17	304.59	305.08	171.97	153	214	5.82	5.71	6.45	3.56	3.75	4.48	320.28	179.657	5.99333	3.93	0.608829	0.608829	0.00528155	0.068959	no
comp17571_c0	comp17571_c0_seq1	694	694	O24542	-	GO:0005634(nucleus);GO:0046983(protein dimerization activity);GO:0009734(auxin mediated signaling pathway);GO:0006355(regulation of transcription, DNA-dependent);GO:0006351(transcription, DNA-dependent)	-	-	-	13023	12761.3	12162.3	6334.14	6865.75	6718.34	468.6	519.39	558.62	284.4	365.38	305.44	12648.8	6639.41	515.537	318.407	0.695204	0.695204	0.00527888	0.068959	no
comp9536_c0	comp9536_c0_seq1,comp9536_c0_seq2	2722	2640.71	-	-	-	-	-	-	1089.34	1035.01	780.98	1143.21	1037.9	1154.01	9.46	10.19	8.67	12.43	13.33	12.69	968.443	1111.71	9.44	12.8167	-0.441162	0.441162	0.00528149	0.068959	no
comp24909_c0	comp24909_c0_seq1	3295	3295	P0C8Q6	-	GO:0005739(mitochondrion)	[R] General function prediction only	-	-	716.99	636.98	455	782.99	681.93	854	4.97	4.99	4.02	6.77	6.99	7.47	602.99	772.973	4.66	7.07667	-0.60274	0.60274	0.00528467	0.0689622	no
comp3655_c0	comp3655_c0_seq1,comp3655_c0_seq2	1854	1773.22	-	-	-	[R] General function prediction only	-	-	357.55	354.01	348	466.41	424.02	456	4.71	5.24	5.86	7.57	8.2	7.51	353.187	448.81	5.27	7.76	-0.558254	0.558254	0.005288	0.0689788	no
comp18003_c0	comp18003_c0_seq1	883	883	-	-	-	-	-	-	5522.52	4759.57	3628.39	2095.74	2320.38	2592.23	152.29	148.46	127.72	72.11	94.64	90.32	4636.83	2336.12	142.823	85.69	0.737033	0.737033	0.00530421	0.0691166	no
comp14363_c0	comp14363_c0_seq1,comp14363_c0_seq2,comp14363_c0_seq3,comp14363_c0_seq4	983	728.84	-	-	-	-	-	-	121.11	106	112.54	61	63	77	4.45	4.58	4.96	2.76	3.49	3.05	113.217	67	4.66333	3.1	0.589093	0.589093	0.00530768	0.0691309	no
comp12918_c0	comp12918_c0_seq1,comp12918_c0_seq2,comp12918_c0_seq3	4193	3679.37	Q9FNP1	adenosinetriphosphatase	GO:0005777(peroxisome);GO:0005524(ATP binding);GO:0017111(nucleoside-triphosphatase activity);GO:0006635(fatty acid beta-oxidation);GO:0016558(protein import into peroxisome matrix)	[O] Posttranslational modification, protein turnover, chaperones	K01509	ko00230(Purine metabolism)	649.23	747.8	512.64	1415.06	1004.86	1140.88	5.03	5.95	4.06	11.2	9.68	8.92	636.557	1186.93	5.01333	9.93333	-0.986508	0.986508	0.00530991	0.069134	no
comp82575_c0	comp82575_c0_seq1	515	515	-	-	-	-	-	-	48.86	32	31	57	45	64	2.47	1.83	2	3.6	3.37	4.09	37.2867	55.3333	2.1	3.68667	-0.811928	0.811928	0.00531809	0.0691555	no
comp15072_c0	comp15072_c0_seq1,comp15072_c0_seq2,comp15072_c0_seq3,comp15072_c0_seq4	4407	3414.17	Q9ZNV9	-	GO:0005829(cytosol);GO:0005634(nucleus);GO:0009927(histidine phosphotransfer kinase activity);GO:0043424(protein histidine kinase binding);GO:0051301(cell division);GO:0016049(cell growth);GO:0009736(cytokinin mediated signaling pathway);GO:0009553(embryo	[F] Nucleotide transport and metabolism	-	-	4179.02	3660.21	3491.22	2818.13	2474.6	2514.05	29.92	29.71	32.12	23.34	25.23	21.88	3776.82	2602.26	30.5833	23.4833	0.381108	0.381108	0.00533147	0.0691967	no
comp18141_c0	comp18141_c0_seq1	1130	1130	Q9LVP9	vesicle transport through interaction with t-SNAREs 1	GO:0016021(integral to membrane);GO:0006886(intracellular protein transport);GO:0016192(vesicle-mediated transport)	[U] Intracellular trafficking, secretion, and vesicular transport	K08493	ko04130(SNARE interactions in vesicular transport)	6306.29	5007.1	5193.84	2597.83	2170.96	2777.93	133.23	119.65	140.06	68.48	67.83	74.15	5502.41	2515.57	130.98	70.1533	0.900763	0.900763	0.00532898	0.0691967	no
comp14638_c0	comp14638_c0_seq1,comp14638_c0_seq2,comp14638_c0_seq3,comp14638_c0_seq4,comp14638_c0_seq5,comp14638_c0_seq6,comp14638_c0_seq7	1567	1252.24	-	-	-	-	-	-	680	644.42	631.21	686.12	626.05	754.02	13.23	13.67	15.1	17.83	19.4	20.23	651.877	688.73	14	19.1533	-0.452169	0.452169	0.00533572	0.0692144	no
comp23087_c0	comp23087_c0_seq1	706	706	-	-	-	-	-	-	438.3	402	349.42	545.83	438.5	569.2	15.47	16.05	15.74	24.04	22.89	25.39	396.573	517.843	15.7533	24.1067	-0.613775	0.613775	0.0053537	0.0693092	no
comp4015_c0	comp4015_c0_seq1,comp4015_c0_seq2	1235	1182.08	Q9SZB9	peroxidase	GO:0005576(extracellular region);GO:0020037(heme binding);GO:0004601(peroxidase activity);GO:0006979(response to oxidative stress)	-	K00430	ko00360(Phenylalanine metabolism);ko00680(Methane metabolism);ko00940(Phenylpropanoid biosynthesis)	1802.44	1583.78	1520.51	676.53	758.15	746	36.13	35.45	38.23	17.4	23.76	19.67	1635.58	726.893	36.6033	20.2767	0.852155	0.852155	0.00536176	0.0693433	no
comp13321_c0	comp13321_c0_seq1,comp13321_c0_seq2,comp13321_c0_seq3	1418	1104.41	P38385	protein transport protein SEC61 subunit gamma and related proteins	GO:0005789(endoplasmic reticulum membrane);GO:0016021(integral to membrane);GO:0015450(P-P-bond-hydrolysis-driven protein transmembrane transporter activity);GO:0006605(protein targeting)	-	K07342	ko03060(Protein export);ko04145(Phagosome);ko05110(Vibrio cholerae infection)	4426.75	4100.02	3909.01	1900.36	2161.52	2487.42	103.09	108.08	117.06	54.8	73.01	71.48	4145.26	2183.1	109.41	66.43	0.719838	0.719838	0.0053771	0.0693433	no
comp23284_c0	comp23284_c0_seq1	1073	1073	-	-	-	-	-	-	496.74	425.52	278.02	646.85	561.8	553.3	11.09	10.75	7.93	18.02	18.56	15.61	400.093	587.317	9.92333	17.3967	-0.809914	0.809914	0.00537047	0.0693433	no
comp4381_c0	comp4381_c0_seq1	623	623	Q8LDK3	-	GO:0005747(mitochondrial respiratory chain complex I);GO:0022900(electron transport chain);GO:0006810(transport)	-	-	-	2129.2	2153.86	1941.25	696.95	890.66	1080.07	86.52	99	100.69	35.34	53.53	55.45	2074.77	889.227	95.4033	48.1067	0.987803	0.987803	0.00536466	0.0693433	no
comp18938_c0	comp18938_c0_seq1	1391	1391	-	-	-	-	-	-	4029.08	3165.41	3354.6	2056.45	1502.78	1763.39	68.25	60.65	72.53	43.47	37.65	37.74	3516.36	1774.21	67.1433	39.62	0.761015	0.761015	0.00540516	0.0694844	no
comp16103_c0	comp16103_c0_seq1,comp16103_c0_seq10,comp16103_c0_seq11,comp16103_c0_seq12,comp16103_c0_seq13,comp16103_c0_seq14,comp16103_c0_seq15,comp16103_c0_seq16,comp16103_c0_seq17,comp16103_c0_seq18,comp16103_c0_seq19,comp16103_c0_seq2,comp16103_c0_seq20,comp16103_	1768	1310.56	-	-	-	[E] Amino acid transport and metabolism	-	-	615.7	589.03	548.88	704.7	624.89	733.99	11.06	12.32	12.99	15.59	16.03	17.17	584.537	687.86	12.1233	16.2633	-0.423837	0.423837	0.00541051	0.0694897	no
comp12263_c0	comp12263_c0_seq1,comp12263_c0_seq2,comp12263_c0_seq3	1295	1228.7	Q944A7	-	GO:0005886(plasma membrane);GO:0009506(plasmodesma);GO:0005773(vacuole);GO:0005524(ATP binding);GO:0005515(protein binding);GO:0004674(protein serine/threonine kinase activity);GO:0009742(brassinosteroid mediated signaling pathway);GO:0009737(response to	-	-	-	841.52	747.95	771.4	1217.92	1239.66	1330.88	16.77	16.62	19.15	30.92	37.37	33.76	786.957	1262.82	17.5133	34.0167	-0.957788	0.957788	0.00542026	0.0695182	no
comp24032_c0	comp24032_c0_seq1	2972	2972	-	-	-	-	-	-	1336.09	962.32	1075.54	1424.04	1392.17	1578.77	10.29	8.38	10.57	13.68	15.85	15.36	1124.65	1464.99	9.74667	14.9633	-0.618451	0.618451	0.00542143	0.0695182	no
comp22074_c0	comp22074_c0_seq1	2257	2257	Q336M2	cyclin-dependent kinase 8/11	GO:0005524(ATP binding);GO:0004693(cyclin-dependent protein kinase activity);GO:0008353(RNA polymerase II carboxy-terminal domain kinase activity)	[K] Transcription	K02208	-	1383.01	1491.47	1048.87	1901.37	1468.54	1876.39	14.13	17.24	13.68	24.25	22.2	24.23	1307.78	1748.77	15.0167	23.56	-0.649775	0.649775	0.00542871	0.0695744	no
comp10475_c0	comp10475_c0_seq1	1886	1886	-	-	-	-	-	-	317	267.99	222.75	197.11	156.98	172	3.9	3.73	3.5	3.03	2.86	2.68	269.247	175.363	3.71	2.85667	0.377086	0.377086	0.00544477	0.0697052	no
comp17102_c0	comp17102_c0_seq1	484	484	P0CG85	ubiquitin C	GO:0005737(cytoplasm);GO:0005634(nucleus)	[O] Posttranslational modification, protein turnover, chaperones ;[R] General function prediction only	K08770	ko03320(PPAR signaling pathway)	20091.1	16208.8	17734.6	9031.65	6229.81	9084.91	1093.21	997.6	1231.76	613.21	501.35	624.58	18011.5	8115.46	1107.52	579.713	0.933926	0.933926	0.00544787	0.0697084	no
comp18830_c0	comp18830_c0_seq1	1122	1122	Q0JNR2	-	GO:0005576(extracellular region);GO:0004869(cysteine-type endopeptidase inhibitor activity);GO:0006952(defense response)	-	-	-	3211.21	3023.9	2578.02	1644.66	1063.97	1595.01	68.36	72.81	70.05	43.69	33.5	42.9	2937.71	1434.55	70.4067	40.03	0.81463	0.81463	0.00545489	0.0697424	no
comp17319_c0	comp17319_c0_seq1	2097	2097	Q43432	V-type H+-transporting ATPase subunit B	GO:0033180(proton-transporting V-type ATPase, V1 domain);GO:0005524(ATP binding);GO:0046933(hydrogen ion transporting ATP synthase activity, rotational mechanism);GO:0046961(proton-transporting ATPase activity, rotational mechanism);GO:0015991(ATP hydroly	[C] Energy production and conversion	K02147	ko00190(Oxidative phosphorylation);ko04145(Phagosome);ko04966(Collecting duct acid secretion);ko05110(Vibrio cholerae infection);ko05120(Epithelial cell signaling in Helicobacter pylori infection)	15550.5	14347.2	14048.9	8101.91	7752.42	9754.79	171.49	178.96	197.76	111.49	126.44	135.92	14648.8	8536.37	182.737	124.617	0.552269	0.552269	0.00546451	0.0697777	no
comp14309_c0	comp14309_c0_seq1,comp14309_c0_seq2,comp14309_c0_seq3,comp14309_c0_seq4,comp14309_c0_seq5,comp14309_c0_seq6	1667	1278.78	-	-	-	-	-	-	73	71	45.31	126.98	75	121	1.22	1.57	1.46	3.07	2.46	2.84	63.1033	107.66	1.41667	2.79	-0.977765	0.977765	0.00551246	0.0697777	no
comp22766_c0	comp22766_c0_seq1	5275	5275	-	-	-	[R] General function prediction only	-	-	1095.89	1181.79	1057.55	1808.92	1720.28	1643.53	4.7	5.73	5.79	9.68	10.91	8.91	1111.74	1724.24	5.40667	9.83333	-0.862941	0.862941	0.00550346	0.0697777	no
comp17710_c0	comp17710_c0_seq1	2377	2377	Q55DE7	-	GO:0005488(binding)	[A] RNA processing and modification	-	-	12128.9	10806.6	11057.2	17058.5	12615.9	14614.8	117.49	118.41	136.72	206.19	180.75	178.88	11330.9	14763.1	124.207	188.607	-0.602638	0.602638	0.00547984	0.0697777	no
comp20978_c0	comp20978_c0_seq1	2459	2459	Q9ZPI1	lysyl-tRNA synthetase, class II	GO:0005829(cytosol);GO:0009506(plasmodesma);GO:0005524(ATP binding);GO:0004824(lysine-tRNA ligase activity);GO:0003676(nucleic acid binding);GO:0006430(lysyl-tRNA aminoacylation)	[J] Translation, ribosomal structure and biogenesis	K04567	ko00970(Aminoacyl-tRNA biosynthesis)	1867.48	1859.55	1354.83	2383.84	1994.73	2245.35	17.47	19.67	16.18	27.82	27.6	26.54	1693.95	2207.97	17.7733	27.32	-0.620243	0.620243	0.00546717	0.0697777	no
comp3481_c0	comp3481_c0_seq1,comp3481_c0_seq2	1744	1727.34	Q8L4R0	putative ABC transport system permease protein	GO:0009706(chloroplast inner membrane);GO:0009707(chloroplast outer membrane);GO:0016021(integral to membrane);GO:0005319(lipid transporter activity)	-	K02066	-	454.91	426.92	419.98	219	209.55	218	6.12	6.54	7.28	3.68	4.23	3.74	433.937	215.517	6.64667	3.88333	0.775335	0.775335	0.00549603	0.0697777	no
comp23136_c0	comp23136_c0_seq1	2021	2021	-	-	-	-	-	-	2556.42	2185.59	2300.76	1122.03	1004.01	1314.04	29.29	28.33	33.65	16.04	17.01	19.02	2347.59	1146.69	30.4233	17.3567	0.809688	0.809688	0.00551784	0.0697777	no
comp18788_c0	comp18788_c0_seq1	2336	2336	Q9M028	-	GO:0016021(integral to membrane)	-	-	-	8211.74	7226.63	7158.7	4559.52	4480.04	4972.75	80.99	80.62	90.12	56.11	65.35	61.97	7532.36	4670.77	83.91	61.1433	0.456648	0.456648	0.00552195	0.0697777	no
comp18459_c0	comp18459_c0_seq1	1110	1110	Q8GT74	E3 ubiquitin-protein ligase RNF115/126	GO:0009535(chloroplast thylakoid membrane);GO:0031351(integral to plastid membrane);GO:0005515(protein binding);GO:0008270(zinc ion binding);GO:0009299(mRNA transcription);GO:0009416(response to light stimulus)	[O] Posttranslational modification, protein turnover, chaperones	K11982	-	3306.94	2658.12	2367.94	2015.23	1462.74	1861.8	71.21	64.74	65.09	54.15	46.59	50.66	2777.67	1779.92	67.0133	50.4667	0.409117	0.409117	0.00549579	0.0697777	no
comp17044_c0	comp17044_c0_seq1	2204	2204	P48631	omega-6 fatty acid desaturase (delta-12 desaturase)	GO:0005789(endoplasmic reticulum membrane);GO:0016021(integral to membrane);GO:0016717(oxidoreductase activity, acting on paired donors, with oxidation of a pair of donors resulting in the reduction of molecular oxygen to two molecules of water);GO:000663	-	K10256	ko01040(Biosynthesis of unsaturated fatty acids)	84229.9	76785.5	75616.6	34885	30171.6	36471.1	882.21	909.68	1010.95	455.92	467.38	482.64	78877.3	33842.6	934.28	468.647	0.995354	0.995354	0.00549228	0.0697777	no
comp12932_c0	comp12932_c0_seq1,comp12932_c0_seq2,comp12932_c0_seq3,comp12932_c0_seq4,comp12932_c0_seq5,comp12932_c0_seq6,comp12932_c0_seq7,comp12932_c0_seq8	1809	1563.18	Q9SZR0	choline monooxygenase	GO:0009570(chloroplast stroma);GO:0051537(2 iron, 2 sulfur cluster binding);GO:0019133(choline monooxygenase activity);GO:0005506(iron ion binding);GO:0006725(cellular aromatic compound metabolic process)	-	K00499	ko00260(Glycine, serine and threonine metabolism)	354	392.96	325.67	481.92	454.97	483.99	5.07	6.58	6.26	8.73	10.08	9.19	357.543	473.627	5.97	9.33333	-0.644661	0.644661	0.0055109	0.0697777	no
comp24992_c0	comp24992_c0_seq1	2249	2249	Q75LL6	transcriptional adapter 2-alpha	GO:0005634(nucleus);GO:0003677(DNA binding);GO:0008270(zinc ion binding);GO:0006355(regulation of transcription, DNA-dependent);GO:0006351(transcription, DNA-dependent)	[B] Chromatin structure and dynamics	K11314	-	887.8	772.73	573.98	910.91	894.19	1013.1	9.11	8.97	7.52	11.66	13.57	13.13	744.837	939.4	8.53333	12.7867	-0.583459	0.583459	0.00547878	0.0697777	no
comp19151_c0	comp19151_c0_seq1	2218	2218	O49675	9-cis-epoxycarotenoid dioxygenase	GO:0010287(plastoglobule);GO:0046872(metal ion binding);GO:0016702(oxidoreductase activity, acting on single donors with incorporation of molecular oxygen, incorporation of two atoms of oxygen);GO:0005515(protein binding)	[Q] Secondary metabolites biosynthesis, transport and catabolism	K09840	ko00906(Carotenoid biosynthesis)	1627.59	1333.12	1447.99	614	673.68	822	16.94	15.69	19.23	7.97	10.37	10.81	1469.57	703.227	17.2867	9.71667	0.831126	0.831126	0.00551284	0.0697777	no
comp18319_c0	comp18319_c0_seq1	1449	1449	Q9FWR5	-	-	-	K00680	ko00350(Tyrosine metabolism);ko00624(1- and 2-Methylnaphthalene degradation);ko00632(Benzoate degradation via CoA ligation);ko00642(Ethylbenzene degradation);ko00903(Limonene and pinene degradation)	8283.85	7376.06	6981.41	3365.94	3576.35	4402.39	134.4	135.37	144.59	68.14	85.82	90.25	7547.11	3781.56	138.12	81.4033	0.762762	0.762762	0.00552034	0.0697777	no
comp5321_c1	comp5321_c1_seq1	1504	1504	Q8W0Z9	-	GO:0005829(cytosol);GO:0005634(nucleus);GO:0046872(metal ion binding);GO:0004535(poly(A)-specific ribonuclease activity);GO:0003723(RNA binding);GO:0006355(regulation of transcription, DNA-dependent);GO:0006351(transcription, DNA-dependent)	[K] Transcription	-	-	353.81	429.88	256.05	606.01	475.57	643.08	5.52	7.59	5.1	11.8	10.97	12.68	346.58	574.887	6.07	11.8167	-0.961055	0.961055	0.00550959	0.0697777	no
comp2702_c0	comp2702_c0_seq1	824	824	-	-	-	-	-	-	13	12	11	17	14	15	0.39	0.4	0.42	0.63	0.62	0.56	12	15.3333	0.403333	0.603333	-0.580983	0.580983	0.00553069	0.0698038	no
comp25505_c0	comp25505_c0_seq1	1922	1922	O64682	protein-serine/threonine kinase	GO:0009986(cell surface);GO:0005829(cytosol);GO:0005524(ATP binding);GO:0005515(protein binding);GO:0004674(protein serine/threonine kinase activity);GO:0009734(auxin mediated signaling pathway);GO:0009926(auxin polar transport);GO:0048825(cotyledon devel	[R] General function prediction only	K08286	-	1004.65	892.78	904.4	507.55	506	556.09	12.13	12.19	13.94	7.65	9.03	8.48	933.943	523.213	12.7533	8.38667	0.604705	0.604705	0.00553954	0.069809	no
comp14608_c0	comp14608_c0_seq1,comp14608_c0_seq10,comp14608_c0_seq11,comp14608_c0_seq12,comp14608_c0_seq13,comp14608_c0_seq14,comp14608_c0_seq15,comp14608_c0_seq16,comp14608_c0_seq17,comp14608_c0_seq18,comp14608_c0_seq2,comp14608_c0_seq3,comp14608_c0_seq4,comp14608_c0	2432	1469.66	-	-	-	-	-	-	985.26	941.79	667.36	1441.52	1140.56	1326.37	16.56	17.49	12.59	28.6	26.65	25.43	864.803	1302.82	15.5467	26.8933	-0.790643	0.790643	0.00554681	0.0698175	no
comp16211_c2	comp16211_c2_seq1,comp16211_c2_seq2,comp16211_c2_seq3,comp16211_c2_seq4	2782	1697.13	Q500Y9	-	GO:0005829(cytosol);GO:0005524(ATP binding);GO:0003951(NAD+ kinase activity);GO:0042736(NADH kinase activity);GO:0006741(NADP biosynthetic process)	[R] General function prediction only	-	-	597.32	684.03	498.2	1124.9	1134.06	1177	9.08	11.26	9.83	15.95	19.48	18.38	593.183	1145.32	10.0567	17.9367	-0.83476	0.83476	0.00554849	0.0698175	no
comp25285_c0	comp25285_c0_seq1	4019	4019	Q9LYN8	-	GO:0016021(integral to membrane);GO:0005886(plasma membrane);GO:0005524(ATP binding);GO:0005515(protein binding);GO:0004674(protein serine/threonine kinase activity);GO:0004872(receptor activity);GO:0007126(meiosis);GO:0009556(microsporogenesis);GO:001023	-	K00924	-	342.04	348.99	209.4	448.26	455.11	549	1.93	2.23	1.51	3.16	3.81	3.92	300.143	484.123	1.89	3.63	-0.941583	0.941583	0.00555502	0.0698175	no
comp5437_c0	comp5437_c0_seq1	1450	1450	P32289	glutamine synthetase	GO:0005737(cytoplasm);GO:0005524(ATP binding);GO:0004356(glutamate-ammonia ligase activity);GO:0006542(glutamine biosynthetic process);GO:0009399(nitrogen fixation)	[E] Amino acid transport and metabolism	K01915	ko00250(Alanine, aspartate and glutamate metabolism);ko00330(Arginine and proline metabolism);ko00910(Nitrogen metabolism);ko02020(Two-component system)	760.26	649.05	607.37	1196.13	1030.94	1055.3	12.33	11.9	12.57	24.2	24.72	21.62	672.227	1094.12	12.2667	23.5133	-0.938736	0.938736	0.00556308	0.069843	no
comp14803_c0	comp14803_c0_seq1,comp14803_c0_seq2,comp14803_c0_seq3,comp14803_c0_seq4,comp14803_c0_seq5,comp14803_c0_seq6	3612	2510.65	Q39008	mitogen-activated protein kinase kinase kinase 5	GO:0005634(nucleus);GO:0005524(ATP binding);GO:0003677(DNA binding);GO:0019900(kinase binding);GO:0004709(MAP kinase kinase kinase activity);GO:0000165(MAPKKK cascade);GO:0046777(protein autophosphorylation);GO:0009409(response to cold);GO:0009651(respons	[T] Signal transduction mechanisms	K04426	ko04010(MAPK signaling pathway);ko04722(Neurotrophin signaling pathway);ko05014(Amyotrophic lateral sclerosis (ALS))	3196.34	3055.55	3157.73	4975.77	4196.5	4462.82	29.84	32.13	38.1	52.43	53.84	48.48	3136.54	4545.03	33.3567	51.5833	-0.62893	0.62893	0.0055859	0.069966	no
comp11068_c1	comp11068_c1_seq1	724	724	Q42962	phosphoglycerate kinase	GO:0005737(cytoplasm);GO:0005524(ATP binding);GO:0004618(phosphoglycerate kinase activity);GO:0006096(glycolysis)	[G] Carbohydrate transport and metabolism	K00927	ko00010(Glycolysis / Gluconeogenesis);ko00710(Carbon fixation in photosynthetic organisms)	4107.42	3736.27	3031.33	1514.07	1347.29	2064.65	140.97	145.05	132.8	64.84	68.39	89.53	3625.01	1642	139.607	74.2533	0.91084	0.91084	0.00558318	0.069966	no
comp12290_c0	comp12290_c0_seq1,comp12290_c0_seq2	2156	1908.07	Q0WQG8	-	GO:0016021(integral to membrane);GO:0005792(microsome);GO:0005886(plasma membrane);GO:0010427(abscisic acid binding);GO:0005525(GTP binding);GO:0051020(GTPase binding);GO:0004872(receptor activity);GO:0009737(response to abscisic acid stimulus);GO:0010228	[T] Signal transduction mechanisms	-	-	1833.35	1652.15	1434.65	1602.77	1367.93	1586.71	22.48	23.58	23.27	26.11	26.5	26.34	1640.05	1519.14	23.11	26.3167	-0.18746	0.18746	0.00559891	0.0699889	no
comp10208_c0	comp10208_c0_seq1,comp10208_c0_seq2,comp10208_c0_seq3	2935	2686.1	Q8RWG1	aarF domain-containing kinase	GO:0010287(plastoglobule);GO:0005524(ATP binding);GO:0004672(protein kinase activity)	[R] General function prediction only	K08869	-	1440.35	1717.96	1245.81	2629.42	1810.1	2330	12.39	16.7	13.76	27.26	22.3	24.79	1468.04	2256.51	14.2833	24.7833	-0.795038	0.795038	0.00560765	0.0700533	no
comp17379_c0	comp17379_c0_seq1	1473	1473	-	-	-	[B] Chromatin structure and dynamics ;[K] Transcription	-	-	13054.4	12742.5	12288	7311.63	3892.2	5491.96	208.17	229.84	250.12	145.49	91.8	110.65	12695	5565.26	229.377	115.98	0.983843	0.983843	0.00561483	0.0701181	no
comp9563_c0	comp9563_c0_seq1,comp9563_c0_seq2,comp9563_c0_seq3	2623	2439.54	Q9FLB0	-	GO:0005524(ATP binding);GO:0008026(ATP-dependent helicase activity);GO:0003723(RNA binding)	[A] RNA processing and modification	K01529	-	1146.16	782.71	869.98	1410.7	1114.53	1193.36	10.79	8.37	10.44	16.42	15.38	14.22	932.95	1239.53	9.86667	15.34	-0.636664	0.636664	0.00562496	0.0701643	no
comp11697_c0	comp11697_c0_seq1,comp11697_c0_seq2	1021	1011.9	O22165	large subunit ribosomal protein L24e	GO:0022625(cytosolic large ribosomal subunit);GO:0005730(nucleolus);GO:0003735(structural constituent of ribosome);GO:0042254(ribosome biogenesis);GO:0006412(translation)	[J] Translation, ribosomal structure and biogenesis	K02896	ko03010(Ribosome)	8270.96	6726.56	5790.75	3570.36	3772.07	4338.69	196.96	180.96	175.65	106.07	132.77	130.35	6929.42	3893.71	184.523	123.063	0.584402	0.584402	0.00563636	0.0702292	no
comp9453_c0	comp9453_c0_seq1,comp9453_c0_seq2,comp9453_c0_seq3,comp9453_c0_seq4	2639	2489.98	Q8RXN5	-	GO:0051539(4 iron, 4 sulfur cluster binding);GO:0010181(FMN binding);GO:0005506(iron ion binding);GO:0016491(oxidoreductase activity);GO:0008033(tRNA processing)	[C] Energy production and conversion	-	-	642.98	589.88	501.92	913.51	888.37	983.03	5.93	6.2	5.9	10.55	12.14	11.33	578.26	928.303	6.01	11.34	-0.915984	0.915984	0.00564288	0.0702815	no
comp15026_c1	comp15026_c1_seq1	2101	2101	-	-	-	-	-	-	181.54	132	107	227.64	190.03	211	2	1.64	1.5	3.13	3.09	2.93	140.18	209.557	1.71333	3.05	-0.832003	0.832003	0.00569001	0.0706335	no
comp7274_c0	comp7274_c0_seq1,comp7274_c0_seq2	1936	1702.13	Q9XI90	-	GO:0005634(nucleus);GO:0043565(sequence-specific DNA binding);GO:0003700(sequence-specific DNA binding transcription factor activity)	-	-	-	682.54	544.47	484.69	1017.39	733.19	1017.01	9.27	8.75	9.59	17.67	15.5	17.96	570.567	922.53	9.20333	17.0433	-0.888979	0.888979	0.0057107	0.0707331	no
comp20569_c0	comp20569_c0_seq1	3025	3025	Q9SVN5	methionyl-tRNA synthetase	GO:0005829(cytosol);GO:0005524(ATP binding);GO:0004825(methionine-tRNA ligase activity);GO:0000049(tRNA binding);GO:0006431(methionyl-tRNA aminoacylation);GO:0046686(response to cadmium ion)	[J] Translation, ribosomal structure and biogenesis	K01874	ko00450(Selenoamino acid metabolism);ko00970(Aminoacyl-tRNA biosynthesis)	2155.35	1960.62	1776.01	2623.74	2454.09	2616.41	16.29	16.77	17.14	24.75	27.44	24.99	1963.99	2564.75	16.7333	25.7267	-0.62054	0.62054	0.00574016	0.0709515	no
comp22660_c0	comp22660_c0_seq1	1510	1510	-	-	-	[A] RNA processing and modification ;[D] Cell cycle control, cell division, chromosome partitioning	-	-	1319.21	1143.83	1035.74	1801.57	1610.03	2012.13	20.49	20.1	20.54	34.92	36.99	39.5	1166.26	1807.91	20.3767	37.1367	-0.865926	0.865926	0.00575358	0.0709649	no
comp26436_c0	comp26436_c0_seq1	841	841	-	-	-	-	-	-	499.24	519.53	459.03	253	216.01	291	14.52	17.09	17.04	9.18	9.29	10.69	492.6	253.337	16.2167	9.72	0.738449	0.738449	0.00574878	0.0709649	no
comp17984_c0	comp17984_c0_seq1	1281	1281	Q9FJX3	voltage-dependent anion channel	-	[P] Inorganic ion transport and metabolism	K05862	ko04020(Calcium signaling pathway);ko05012(Parkinson's disease);ko05016(Huntington's disease)	5641.19	4203.88	4457.04	1880.07	2164.36	2681.29	104.27	87.89	105.15	43.36	59.17	62.62	4767.37	2241.91	99.1033	55.05	0.848191	0.848191	0.005757	0.0709649	no
comp3999_c0	comp3999_c0_seq1,comp3999_c0_seq2	1628	1147.58	P49572	indole-3-glycerol phosphate synthase	GO:0009507(chloroplast);GO:0005829(cytosol);GO:0005507(copper ion binding);GO:0004425(indole-3-glycerol-phosphate synthase activity);GO:0000162(tryptophan biosynthetic process)	[E] Amino acid transport and metabolism	K01609	ko00400(Phenylalanine, tyrosine and tryptophan biosynthesis)	1889.47	1569.81	1308.51	925.7	1053.32	1228.85	69.16	63.75	71.88	25.97	40.43	36.85	1589.26	1069.29	68.2633	34.4167	0.988003	0.988003	0.00575542	0.0709649	no
comp17867_c0	comp17867_c0_seq1	1449	1449	-	-	-	-	-	-	5194.77	4551.22	4614.87	2286.66	1801.56	2244.9	84.28	83.52	95.58	46.29	43.23	46.02	4786.95	2111.04	87.7933	45.18	0.958427	0.958427	0.00575898	0.0709649	no
comp8526_c0	comp8526_c0_seq1	485	485	-	-	-	-	-	-	32.96	28.1	17	39.88	42	48	1.79	1.73	1.18	2.7	3.37	3.29	26.02	43.2933	1.56667	3.12	-0.993848	0.993848	0.00575466	0.0709649	no
comp16584_c4	comp16584_c4_seq1,comp16584_c4_seq2,comp16584_c4_seq3,comp16584_c4_seq4	999	899.13	O48650	-	GO:0003743(translation initiation factor activity);GO:0006417(regulation of translation)	[J] Translation, ribosomal structure and biogenesis	-	-	35622.7	31243.8	32905.2	20622.8	13852.9	15666.2	961.82	952.45	1132.68	692.2	554.44	535.33	33257.2	16714	1015.65	593.99	0.773893	0.773893	0.00577125	0.0710067	no
comp7865_c0	comp7865_c0_seq1,comp7865_c0_seq2	2568	2376.71	-	-	-	[O] Posttranslational modification, protein turnover, chaperones	-	-	1442.32	1023.71	921.04	1898.53	1671.63	2304.29	13.96	11.18	11.63	22.24	23.26	27.32	1129.02	1958.15	12.2567	24.2733	-0.985806	0.985806	0.0057683	0.0710067	no
comp25232_c0	comp25232_c0_seq1	972	972	Q9SK27	-	GO:0046658(anchored to plasma membrane);GO:0009506(plasmodesma);GO:0005507(copper ion binding);GO:0009055(electron carrier activity)	-	-	-	260	261.55	197.57	387.98	374.86	364.95	6.46	7.35	6.27	12.03	13.77	11.46	239.707	375.93	6.69333	12.42	-0.891868	0.891868	0.00583884	0.0715033	no
comp5231_c0	comp5231_c0_seq1,comp5231_c0_seq2	2095	1938.05	-	-	-	-	-	-	4332.57	3884.51	2797.36	5152.15	4306.28	5842.35	53.39	54.28	44.56	78.3	75.03	88.95	3671.48	5100.26	50.7433	80.76	-0.670423	0.670423	0.00583992	0.0715033	no
comp21561_c0	comp21561_c0_seq1	1447	1447	P43394	CDP-4-dehydro-6-deoxyglucose reductase	GO:0016491(oxidoreductase activity)	-	K00523	ko00520(Amino sugar and nucleotide sugar metabolism)	473.06	360	375.09	512.01	511.03	551	7.69	6.62	7.78	10.38	12.28	11.31	402.717	524.68	7.36333	11.3233	-0.620868	0.620868	0.00586872	0.0715894	no
comp10100_c0	comp10100_c0_seq1,comp10100_c0_seq2	1831	1718.15	Q9LDI3	-	GO:0009705(plant-type vacuole membrane);GO:0005524(ATP binding);GO:0005515(protein binding);GO:0004674(protein serine/threonine kinase activity);GO:0009651(response to salt stress);GO:0007165(signal transduction)	[T] Signal transduction mechanisms	K00924	-	1397.24	1435.86	1114.98	1539.31	1183.97	1384.3	18.22	21.09	18.61	27.14	24.96	25.02	1316.03	1369.19	19.3067	25.7067	-0.413043	0.413043	0.00587462	0.0715894	no
comp21127_c0	comp21127_c0_seq1	3602	3602	-	-	-	[A] RNA processing and modification	-	-	1660.69	1578.87	1164.08	2006.48	1693.04	2042.64	10.5	11.29	9.4	15.83	15.83	16.32	1467.88	1914.05	10.3967	15.9933	-0.62135	0.62135	0.00586361	0.0715894	no
comp20594_c0	comp20594_c0_seq1	1164	1164	Q9CX30	-	GO:0016021(integral to membrane)	[S] Function unknown	-	-	2192.93	2143.28	1910.52	1114.65	966.92	1138.44	44.88	49.62	49.91	28.47	29.27	29.44	2082.24	1073.34	48.1367	29.06	0.728102	0.728102	0.00587683	0.0715894	no
comp21974_c0	comp21974_c0_seq1	1563	1563	Q94JW0	deoxyhypusine monooxygenase	GO:0005829(cytosol);GO:0019135(deoxyhypusine monooxygenase activity);GO:0046872(metal ion binding);GO:0008612(peptidyl-lysine modification to hypusine)	[R] General function prediction only	K06072	-	1918.88	1927.36	1419.91	891.11	745.25	1047.01	28.75	32.66	27.16	16.66	16.51	19.82	1755.38	894.457	29.5233	17.6633	0.741098	0.741098	0.00588774	0.0716678	no
comp13120_c0	comp13120_c0_seq1,comp13120_c0_seq2,comp13120_c0_seq3,comp13120_c0_seq4	2611	2220.01	-	-	-	-	-	-	989.48	787.1	569.75	1400.06	1140.97	1110.54	10.66	9.46	7.81	17.81	17.13	14.51	782.11	1217.19	9.31	16.4833	-0.824155	0.824155	0.00589372	0.0716683	no
comp13129_c0	comp13129_c0_seq1,comp13129_c0_seq2	1664	1556.53	-	-	-	-	-	-	391.04	349	375.06	698.77	589.06	574.02	5.99	5.99	7.3	12.7	13.13	10.67	371.7	620.617	6.42667	12.1667	-0.920791	0.920791	0.00592357	0.0717015	no
comp14488_c1	comp14488_c1_seq1,comp14488_c1_seq2,comp14488_c1_seq3,comp14488_c1_seq4	2934	2208.85	Q9FFH3	ribonuclease P subunit RPR2	GO:0005634(nucleus);GO:0003677(DNA binding);GO:0008270(zinc ion binding);GO:0010260(organ senescence);GO:0048573(photoperiodism, flowering);GO:0045893(positive regulation of transcription, DNA-dependent);GO:0048510(regulation of timing of transition from	[R] General function prediction only	K03540	-	1485.53	1253.91	1417.65	1991.2	1725.24	2155.59	18.58	17.9	22.75	30.55	31.97	36.75	1385.7	1957.34	19.7433	33.09	-0.74503	0.74503	0.00590392	0.0717015	no
comp4487_c1	comp4487_c1_seq1	1648	1648	P49076	Arf/Sar family, other	GO:0005794(Golgi apparatus);GO:0005525(GTP binding);GO:0015031(protein transport);GO:0007264(small GTPase mediated signal transduction);GO:0016192(vesicle-mediated transport)	[U] Intracellular trafficking, secretion, and vesicular transport	K07977	-	1215.76	1250.29	1077.42	1957.45	1658.25	1646.11	17.23	20.04	19.49	34.62	34.76	29.48	1181.16	1753.94	18.92	32.9533	-0.800512	0.800512	0.00591718	0.0717015	no
comp59877_c0	comp59877_c0_seq1	1402	1402	-	-	-	-	-	-	60.81	46.99	36	93	74	73.01	1.02	0.89	0.77	1.95	1.84	1.55	47.9333	80.0033	0.893333	1.78	-0.994607	0.994607	0.005923	0.0717015	no
comp3698_c0	comp3698_c0_seq1,comp3698_c0_seq2	2766	2146.15	-	-	-	-	-	-	440.26	382.95	324.56	343.04	264.99	317.36	5.13	5	4.77	4.15	3.99	4.11	382.59	308.463	4.96667	4.08333	0.282531	0.282531	0.00591788	0.0717015	no
comp23272_c0	comp23272_c0_seq1	2113	2113	Q8VZL4	-	-	-	-	-	1795.64	1825.13	1539.14	1019.01	971.93	1110.5	19.65	22.59	21.5	13.91	15.73	15.35	1719.97	1033.81	21.2467	14.9967	0.502595	0.502595	0.00592778	0.0717015	no
comp23320_c0	comp23320_c0_seq1	2001	2001	Q06265	exosome complex component RRP45	GO:0005829(cytosol);GO:0000176(nuclear exosome (RNase complex));GO:0005730(nucleolus);GO:0005634(nucleus);GO:0000175(3'-5'-exoribonuclease activity);GO:0017091(AU-rich element binding);GO:0043928(exonucleolytic nuclear-transcribed mRNA catabolic process i	[J] Translation, ribosomal structure and biogenesis	K03678	ko03018(RNA degradation)	852.84	862.72	725.8	1298.79	1024.76	1085.01	9.87	11.3	10.73	18.76	17.55	15.87	813.787	1136.19	10.6333	17.3933	-0.709941	0.709941	0.00592325	0.0717015	no
comp9745_c0	comp9745_c0_seq1,comp9745_c0_seq2,comp9745_c0_seq3,comp9745_c0_seq4,comp9745_c0_seq5	1774	1209.05	Q9C7A8	GINS complex subunit 2	GO:0005634(nucleus);GO:0006260(DNA replication)	[S] Function unknown	K10733	-	756.77	596	619.17	777.51	738.19	842.91	15.06	13.19	15.75	18.9	21.21	20.48	657.313	786.203	14.6667	20.1967	-0.461576	0.461576	0.00591547	0.0717015	no
comp20372_c0	comp20372_c0_seq1	3276	3276	-	-	-	-	-	-	1837.65	1689.77	1756.87	2501.86	1872.75	2218.14	12.8	13.32	15.62	21.75	19.3	19.53	1761.43	2197.58	13.9133	20.1933	-0.537411	0.537411	0.0059323	0.0717015	no
comp11374_c0	comp11374_c0_seq1,comp11374_c0_seq2,comp11374_c0_seq3	1757	1538.06	-	COP9 signalosome complex subunit 7	-	-	K12180	-	2213.82	2185.29	1498.27	2979.03	2530.06	2747.09	34.26	37.96	29.57	54.66	55.52	51.74	1965.79	2752.06	33.93	53.9733	-0.669685	0.669685	0.00594023	0.0717793	no
comp15222_c0	comp15222_c0_seq1,comp15222_c0_seq2,comp15222_c0_seq3,comp15222_c0_seq4,comp15222_c0_seq5,comp15222_c0_seq6,comp15222_c0_seq7	5473	4102.52	Q5U4E6	-	-	-	-	-	689.83	593	589.99	1230.38	1057.79	1098.66	5.04	5.82	6.35	9.13	8.71	8.47	624.273	1128.94	5.73667	8.77	-0.612364	0.612364	0.00595191	0.0718119	no
comp4654_c0	comp4654_c0_seq1	3711	3711	-	LATS, large tumor suppressor	-	[T] Signal transduction mechanisms ;[U] Intracellular trafficking, secretion, and vesicular transport	K08791	-	1704.48	1661.05	1569.15	2128.41	2126.57	2343.99	10.46	11.52	12.29	16.29	19.29	18.17	1644.89	2199.66	11.4233	17.9167	-0.649319	0.649319	0.00594492	0.0718119	no
comp9592_c1	comp9592_c1_seq1,comp9592_c1_seq2	2505	1964.59	O23661	-	GO:0005634(nucleus);GO:0003677(DNA binding);GO:0003700(sequence-specific DNA binding transcription factor activity);GO:0010158(abaxial cell fate specification);GO:0009734(auxin mediated signaling pathway);GO:0009850(auxin metabolic process);GO:0010050(veg	-	-	-	480.73	354	269.85	620.8	509	580.95	5.73	4.82	4.13	9.08	8.61	8.31	368.193	570.25	4.89333	8.66667	-0.82466	0.82466	0.00596315	0.0718752	no
comp11377_c0	comp11377_c0_seq1,comp11377_c0_seq2	427	347.52	-	-	-	-	-	-	1495.53	1279.13	1026.64	591	615.78	778.07	122.25	117.55	106.45	58.87	74.23	79.84	1267.1	661.617	115.417	70.98	0.701367	0.701367	0.00597153	0.0719041	no
comp21846_c0	comp21846_c0_seq1	2798	2798	-	-	-	[U] Intracellular trafficking, secretion, and vesicular transport	-	-	1738.96	1569.02	1590.48	2215.29	1893.92	2256.49	14.24	14.53	16.63	22.64	22.94	23.35	1632.82	2121.9	15.1333	22.9767	-0.60244	0.60244	0.00602198	0.0720955	no
comp2573_c0	comp2573_c0_seq1,comp2573_c0_seq2	374	323.45	-	-	-	-	-	-	102	132	118	183.98	161.99	151.39	7.59	11.1	11.95	20.79	20.68	18.14	117.333	165.787	10.2133	19.87	-0.960138	0.960138	0.00602981	0.0721713	no
comp10918_c1	comp10918_c1_seq1	787	787	B1I1J7	small subunit ribosomal protein S17	GO:0005840(ribosome);GO:0019843(rRNA binding);GO:0003735(structural constituent of ribosome);GO:0006412(translation)	[J] Translation, ribosomal structure and biogenesis	K02961	ko03010(Ribosome)	2838.11	2337.32	2487.87	1228.86	1222.26	1410.27	88.8	82.72	99.36	47.98	56.56	55.75	2554.43	1287.13	90.2933	53.43	0.756969	0.756969	0.00604563	0.0722345	no
comp21562_c0	comp21562_c0_seq1	2079	2079	Q8W490	-	GO:0005524(ATP binding);GO:0004674(protein serine/threonine kinase activity)	[T] Signal transduction mechanisms	K00924	-	1766.58	1635.54	1197.72	1894	1714.4	1853.22	19.66	20.58	17.01	26.3	28.21	26.05	1533.28	1820.54	19.0833	26.8533	-0.492788	0.492788	0.00605668	0.0722978	no
comp8415_c0	comp8415_c0_seq1,comp8415_c0_seq2	1161	1159.59	P42814	ribonuclease T2	GO:0005783(endoplasmic reticulum);GO:0010168(ER body);GO:0005773(vacuole);GO:0033897(ribonuclease T2 activity);GO:0003723(RNA binding);GO:0010507(negative regulation of autophagy);GO:0006950(response to stress);GO:0016075(rRNA catabolic process)	[A] RNA processing and modification	K01166	-	3501.91	3193.74	3094.03	1664.78	1434.26	1624.47	71.94	74.19	81.11	42.76	43.64	42.22	3263.23	1574.5	75.7467	42.8733	0.821102	0.821102	0.00605563	0.0722978	no
comp2399_c0	comp2399_c0_seq1	2475	2475	Q0WQF7	pyruvate dehydrogenase E2 component (dihydrolipoamide acetyltransferase)	GO:0005759(mitochondrial matrix);GO:0005524(ATP binding);GO:0004742(dihydrolipoyllysine-residue acetyltransferase activity);GO:0006096(glycolysis)	[C] Energy production and conversion	K00627	ko00010(Glycolysis / Gluconeogenesis);ko00020(Citrate cycle (TCA cycle));ko00620(Pyruvate metabolism)	438.17	426.09	309.99	516.87	522.12	589.09	4.07	4.48	3.68	5.99	7.18	6.92	391.417	542.693	4.07667	6.69667	-0.716053	0.716053	0.00605995	0.0723094	no
comp18039_c0	comp18039_c0_seq1	1142	1142	O48964	isopentenyl-diphosphate delta-isomerase	GO:0016787(hydrolase activity);GO:0004452(isopentenyl-diphosphate delta-isomerase activity);GO:0046872(metal ion binding);GO:0015995(chlorophyll biosynthetic process);GO:0008299(isoprenoid biosynthetic process);GO:0015979(photosynthesis)	[Q] Secondary metabolites biosynthesis, transport and catabolism	K01823	ko00900(Terpenoid backbone biosynthesis)	5576.04	5025.58	4342.85	3596.44	3079.43	3282.57	116.48	118.74	115.8	93.74	95.14	86.64	4981.49	3319.48	117.007	91.84	0.349396	0.349396	0.00607132	0.0723634	no
comp14401_c0	comp14401_c0_seq1,comp14401_c0_seq2,comp14401_c0_seq3,comp14401_c0_seq4,comp14401_c0_seq5	1451	1117.24	-	-	-	-	-	-	208.66	204.95	146.02	314.25	325.01	307	4.72	5.67	4.08	8.29	10.23	8.62	186.543	315.42	4.82333	9.04667	-0.907356	0.907356	0.00607329	0.0723634	no
comp15408_c0	comp15408_c0_seq1,comp15408_c0_seq2,comp15408_c0_seq3,comp15408_c0_seq4,comp15408_c0_seq5,comp15408_c0_seq6,comp15408_c0_seq7,comp15408_c0_seq8,comp15408_c0_seq9	4957	4194.15	Q46888	-	GO:0008442(3-hydroxyisobutyrate dehydrogenase activity);GO:0050662(coenzyme binding);GO:0004616(phosphogluconate dehydrogenase (decarboxylating) activity);GO:0006098(pentose-phosphate shunt);GO:0006573(valine metabolic process)	[R] General function prediction only	K00120	ko00361(gamma-Hexachlorocyclohexane degradation);ko00363(Bisphenol A degradation);ko00624(1- and 2-Methylnaphthalene degradation);ko00626(Naphthalene and anthracene degradation);ko00632(Benzoate degradation via CoA ligation);ko00903(Limonene and pinene de	1138.6	988.41	798.48	2245.58	1818.03	1818.96	8.87	6.8	7.04	14.11	13.87	11.61	975.163	1960.86	7.57	13.1967	-0.801808	0.801808	0.00608399	0.0723634	no
comp16010_c0	comp16010_c0_seq1	1657	1657	P31843	-	GO:0005739(mitochondrion);GO:0003723(RNA binding);GO:0003964(RNA-directed DNA polymerase activity);GO:0006278(RNA-dependent DNA replication)	[R] General function prediction only	-	-	66.91	49	35	90	63	91.98	0.94	0.78	0.63	1.58	1.31	1.64	50.3033	81.66	0.783333	1.51	-0.94685	0.94685	0.00606782	0.0723634	no
comp22447_c0	comp22447_c0_seq1	2032	2032	-	-	-	-	-	-	2254.29	2097.68	1663.22	1313.45	851.86	1062.83	25.69	27.03	24.19	18.67	14.36	15.3	2005.06	1076.05	25.6367	16.11	0.670252	0.670252	0.00609595	0.0724072	no
comp5535_c0	comp5535_c0_seq1,comp5535_c0_seq2	1788	1662.1	Q8VD33	protein phosphatase	GO:0005488(binding)	[R] General function prediction only	K01090	-	1607.91	1327.67	1411.76	2213.73	1759.3	1866.03	22.62	21.33	24.46	40.12	38.05	33.91	1449.11	1946.35	22.8033	37.36	-0.71225	0.71225	0.00609682	0.0724072	no
comp12877_c0	comp12877_c0_seq1,comp12877_c0_seq2,comp12877_c0_seq3,comp12877_c0_seq4,comp12877_c0_seq5,comp12877_c0_seq6,comp12877_c0_seq7,comp12877_c0_seq8	1581	1531.22	Q8W5S1	cyclin H	GO:0005737(cytoplasm);GO:0005675(holo TFIIH complex);GO:0004672(protein kinase activity);GO:0019901(protein kinase binding);GO:0007049(cell cycle);GO:0051301(cell division);GO:0000079(regulation of cyclin-dependent protein kinase activity);GO:0006355(regu	[D] Cell cycle control, cell division, chromosome partitioning ;[K] Transcription ;[L] Replication, recombination and repair	K06634	ko03420(Nucleotide excision repair);ko04110(Cell cycle)	654.29	740.21	610.78	920.55	818.93	1089.85	9.92	12.72	11.85	17.64	18.45	21.21	668.427	943.11	11.4967	19.1	-0.732357	0.732357	0.00610763	0.072506	no
comp10101_c0	comp10101_c0_seq1,comp10101_c0_seq2	2382	2327.93	-	-	-	[S] Function unknown	-	-	3240.1	2979.87	2239.67	3623.96	3168.56	3754.9	31.77	33.27	27.89	46.36	47.5	47.89	2819.88	3515.81	30.9767	47.25	-0.609132	0.609132	0.00614928	0.0725902	no
comp10036_c0	comp10036_c0_seq1,comp10036_c0_seq2	1233	962.09	-	-	-	-	-	-	248.89	212	199.74	75.29	93.45	76	5.83	6.41	6.55	2.65	3.98	2.95	220.21	81.58	6.26333	3.19333	0.971868	0.971868	0.00615453	0.0725902	no
comp14721_c0	comp14721_c0_seq1,comp14721_c0_seq10,comp14721_c0_seq11,comp14721_c0_seq2,comp14721_c0_seq3,comp14721_c0_seq4,comp14721_c0_seq5,comp14721_c0_seq6,comp14721_c0_seq7,comp14721_c0_seq8,comp14721_c0_seq9	2379	1520.1	Q8LAC4	-	GO:0005829(cytosol);GO:0047724(inosine nucleosidase activity);GO:0035251(UDP-glucosyltransferase activity);GO:0045437(uridine nucleosidase activity);GO:0006148(inosine catabolic process);GO:0010150(leaf senescence)	[F] Nucleotide transport and metabolism	-	-	1382.96	1309.37	865.06	1378.6	1365.35	1641.19	20.21	21.08	16.54	26.96	30.79	31.49	1185.8	1461.71	19.2767	29.7467	-0.625872	0.625872	0.00613195	0.0725902	no
comp18524_c0	comp18524_c0_seq1	1295	1295	-	-	-	[S] Function unknown	-	-	5545.76	5459.04	4651.89	2877.96	2408.15	2845.94	101.33	112.82	108.49	65.61	65.08	65.7	5218.9	2710.68	107.547	65.4633	0.716204	0.716204	0.00614263	0.0725902	no
comp9955_c0	comp9955_c0_seq1,comp9955_c0_seq2	1926	1844.09	Q9LLY4	1-acyl-sn-glycerol-3-phosphate acyltransferase	GO:0031969(chloroplast membrane);GO:0016021(integral to membrane);GO:0003841(1-acylglycerol-3-phosphate O-acyltransferase activity);GO:0008654(phospholipid biosynthetic process)	[I] Lipid transport and metabolism	K00655	ko00561(Glycerolipid metabolism);ko00564(Glycerophospholipid metabolism)	375.02	388.66	353.2	675.96	590.51	573	4.89	5.74	5.74	10.72	11.38	9.31	372.293	613.157	5.45667	10.47	-0.94017	0.94017	0.00614845	0.0725902	no
comp9779_c0	comp9779_c0_seq1,comp9779_c0_seq2,comp9779_c0_seq3	3169	2934.58	Q38998	hyperpolarization activated cyclic nucleotide-gated potassium channel 2	GO:0016021(integral to membrane);GO:0005886(plasma membrane);GO:0042802(identical protein binding);GO:0005242(inward rectifier potassium channel activity);GO:0009651(response to salt stress);GO:0048767(root hair elongation)	[P] Inorganic ion transport and metabolism ;[T] Signal transduction mechanisms	K04955	-	1637.3	1507.85	1110.14	2765.01	2108.91	2251.81	13.45	14.29	10.88	28.62	25.19	22.71	1418.43	2375.24	12.8733	25.5067	-0.986489	0.986489	0.00613804	0.0725902	no
comp30601_c0	comp30601_c0_seq1	594	594	-	-	-	-	-	-	343	274	296.96	170.2	118.01	168	14.72	13.3	16.26	9.11	7.49	9.11	304.653	152.07	14.76	8.57	0.784326	0.784326	0.00615472	0.0725902	no
comp29700_c0	comp29700_c0_seq1	1179	1179	-	-	-	-	-	-	872.01	667.04	608.43	348.22	317	458.21	17.61	15.23	15.68	8.77	9.47	11.69	715.827	374.477	16.1733	9.97667	0.696987	0.696987	0.00618655	0.072599	no
comp19240_c0	comp19240_c0_seq1	1403	1403	-	-	-	-	-	-	3133.66	2278.55	2291.24	3417.19	2706.06	3126.78	52.6	43.26	49.09	71.58	67.18	66.32	2567.82	3083.34	48.3167	68.36	-0.500631	0.500631	0.00618211	0.072599	no
comp8653_c0	comp8653_c0_seq1,comp8653_c0_seq2	3380	3144.96	O80739	KUP system potassium uptake protein	GO:0009507(chloroplast);GO:0016021(integral to membrane);GO:0005886(plasma membrane);GO:0015079(potassium ion transmembrane transporter activity)	-	K03549	-	3920.48	3465.31	3166.09	5091.38	4088.52	4474.47	28.65	28.61	29.56	45.68	43.78	41.05	3517.29	4551.46	28.94	43.5033	-0.588061	0.588061	0.00618279	0.072599	no
comp19962_c0	comp19962_c0_seq1	1384	1384	P0CO87	mortality factor 4-like protein 1	GO:0005634(nucleus);GO:0016568(chromatin modification);GO:0006281(DNA repair);GO:0006355(regulation of transcription, DNA-dependent);GO:0006351(transcription, DNA-dependent)	[B] Chromatin structure and dynamics ;[K] Transcription	K11339	-	1496.29	1228.44	968.56	1804.51	1645.36	1599.65	25.48	23.66	21.05	38.35	41.44	34.42	1231.1	1683.17	23.3967	38.07	-0.702352	0.702352	0.00619537	0.0726669	no
comp34653_c0	comp34653_c0_seq1	1816	1816	O64763	E3 ubiquitin-protein ligase RNF115/126	GO:0016021(integral to membrane);GO:0004842(ubiquitin-protein ligase activity);GO:0008270(zinc ion binding);GO:0050832(defense response to fungus);GO:0010200(response to chitin)	[O] Posttranslational modification, protein turnover, chaperones	K11982	-	466.94	361.88	305.96	445.5	393.87	486.01	5.98	5.24	5	7.12	7.46	7.86	378.26	441.793	5.40667	7.48	-0.468299	0.468299	0.00619475	0.0726669	no
comp99859_c0	comp99859_c0_seq1	485	485	-	-	-	-	-	-	23	14.02	13	31	22	26	1.25	0.86	0.9	2.1	1.77	1.78	16.6733	26.3333	1.00333	1.88333	-0.908487	0.908487	0.0061969	0.0726671	no
comp21340_c0	comp21340_c0_seq1	3234	3234	Q3LSN5	lipoic acid synthetase	GO:0005739(mitochondrion);GO:0051539(4 iron, 4 sulfur cluster binding);GO:0016992(lipoate synthase activity);GO:0046872(metal ion binding)	[H] Coenzyme transport and metabolism	K03644	ko00785(Lipoic acid metabolism)	2123.14	1714.04	1750.29	1105.67	1056.48	1168.53	14.99	13.69	15.77	9.74	11.03	10.42	1862.49	1110.23	14.8167	10.3967	0.5111	0.5111	0.00620495	0.072726	no
comp27781_c0	comp27781_c0_seq1	694	694	-	-	-	-	-	-	417	393.12	349.95	189.64	188.23	241.99	15	16	16.07	8.51	10.02	11	386.69	206.62	15.69	9.84333	0.672626	0.672626	0.00621503	0.0727775	no
comp14743_c0	comp14743_c0_seq1,comp14743_c0_seq2,comp14743_c0_seq3	2661	2428.51	Q8LAP6	-	GO:0009535(chloroplast thylakoid membrane);GO:0005198(structural molecule activity)	-	-	-	307.52	249.17	214	312	385.77	376.65	2.92	2.74	2.57	4.57	5.35	4.67	256.897	358.14	2.74333	4.86333	-0.826016	0.826016	0.00621614	0.0727775	no
comp8886_c0	comp8886_c0_seq1	773	773	Q9SD88	-	GO:0016021(integral to membrane)	[S] Function unknown	-	-	4176.32	3792.39	3622.35	1430.5	1653.11	2106.77	133.29	136.91	147.57	56.97	78.03	84.96	3863.69	1730.13	139.257	73.32	0.925468	0.925468	0.00621873	0.0727808	no
comp9321_c0	comp9321_c0_seq1	939	939	-	-	-	-	-	-	144.64	157.98	161.32	280.19	191.92	273.84	3.73	4.61	5.31	9.02	7.32	8.92	154.647	248.65	4.55	8.42	-0.887954	0.887954	0.00623028	0.0728272	no
comp17624_c0	comp17624_c0_seq1	1628	1628	Q2KJD3	-	GO:0005681(spliceosomal complex);GO:0003723(RNA binding);GO:0000398(nuclear mRNA splicing, via spliceosome)	[S] Function unknown	-	-	15817.3	14406.2	13193.8	10295.8	7345.02	9407.71	227.07	233.93	241.77	184.43	155.95	170.64	14472.4	9016.18	234.257	170.34	0.459673	0.459673	0.00624781	0.0729383	no
comp22704_c0	comp22704_c0_seq1	543	543	O14280	BolA protein	-	[T] Signal transduction mechanisms	K05527	-	438.17	401.04	368.32	204.34	200	256	20.84	21.58	22.36	12.13	14.07	15.39	402.51	220.113	21.5933	13.8633	0.639312	0.639312	0.00625516	0.0729848	no
comp20253_c0	comp20253_c0_seq1	1198	1198	O48671	-	GO:0005801(cis-Golgi network);GO:0005783(endoplasmic reticulum);GO:0016021(integral to membrane);GO:0006890(retrograde vesicle-mediated transport, Golgi to ER)	[U] Intracellular trafficking, secretion, and vesicular transport	-	-	2297.73	2343.36	2065.15	1137.83	1227.89	1364.91	45.61	52.61	52.32	28.18	36.04	34.23	2235.41	1243.54	50.18	32.8167	0.612684	0.612684	0.00625897	0.0729848	no
comp14690_c0	comp14690_c0_seq1,comp14690_c0_seq2,comp14690_c0_seq3	2084	1943.27	Q50EK3	-	GO:0016021(integral to membrane);GO:0009055(electron carrier activity);GO:0020037(heme binding);GO:0004497(monooxygenase activity);GO:0016705(oxidoreductase activity, acting on paired donors, with incorporation or reduction of molecular oxygen)	[Q] Secondary metabolites biosynthesis, transport and catabolism ;[I] Lipid transport and metabolism	K00517	ko00361(gamma-Hexachlorocyclohexane degradation);ko00626(Naphthalene and anthracene degradation);ko00903(Limonene and pinene degradation);ko00945(Stilbenoid, diarylheptanoid and gingerol biosynthesis)	583.35	537.15	535	765.39	556.79	650	6.53	6.88	7.82	11.95	10.42	10.25	551.833	657.393	7.07667	10.8733	-0.619652	0.619652	0.00625688	0.0729848	no
comp22339_c0	comp22339_c0_seq1	2623	2623	-	-	-	-	-	-	896.38	756.78	803.03	1359.18	1231.16	1179.03	7.85	7.49	8.97	14.84	15.94	13.04	818.73	1256.46	8.10333	14.6067	-0.85004	0.85004	0.00627016	0.0730443	no
comp3497_c0	comp3497_c0_seq1	2340	2340	-	-	-	-	-	-	509	328	403.09	580.79	577.94	636.27	5.01	3.65	5.07	7.13	8.42	7.91	413.363	598.333	4.57667	7.82	-0.772871	0.772871	0.00626973	0.0730443	no
comp13235_c0	comp13235_c0_seq1,comp13235_c0_seq2	1756	1470.88	B7KI17	peptide chain release factor RF-1	GO:0005737(cytoplasm);GO:0016149(translation release factor activity, codon specific)	[J] Translation, ribosomal structure and biogenesis	K02835	-	394	380	247.24	583.05	658.83	599.05	7.55	8.24	6.44	13.05	15.96	13.46	340.413	613.643	7.41	14.1567	-0.933936	0.933936	0.00627631	0.0730861	no
comp10322_c0	comp10322_c0_seq1,comp10322_c0_seq2,comp10322_c0_seq3	3070	2625.89	-	-	-	-	-	-	347.03	349.27	224.34	508.19	393.59	533.73	4.01	3.81	3.43	5.45	4.8	5.41	306.88	478.503	3.75	5.22	-0.477159	0.477159	0.00628686	0.0730861	no
comp3473_c0	comp3473_c0_seq1,comp3473_c0_seq2	1281	1204.81	Q9SX33	phospholipid-translocating ATPase	GO:0016021(integral to membrane);GO:0005524(ATP binding);GO:0015662(ATPase activity, coupled to transmembrane movement of ions, phosphorylative mechanism);GO:0000287(magnesium ion binding);GO:0004012(phospholipid-translocating ATPase activity);GO:0006754(	[R] General function prediction only	K01530	-	211.98	217.07	200.89	268	245.07	278.99	4.17	4.85	5.1	6.54	7.03	6.92	209.98	264.02	4.70667	6.83	-0.53718	0.53718	0.00629248	0.0731091	no
comp6031_c0	comp6031_c0_seq1,comp6031_c0_seq2	2782	2062.92	Q05AS3	adenosinetriphosphatase	GO:0016021(integral to membrane);GO:0005874(microtubule);GO:0005815(microtubule organizing center);GO:0005634(nucleus);GO:0048471(perinuclear region of cytoplasm);GO:0043014(alpha-tubulin binding);GO:0005524(ATP binding);GO:0048487(beta-tubulin binding);G	[O] Posttranslational modification, protein turnover, chaperones	K01509	ko00230(Purine metabolism)	761	715.11	492.99	1484.41	1003.7	1150.95	8.8	9.26	7.18	18.79	15.59	15.39	656.367	1213.02	8.41333	16.59	-0.979564	0.979564	0.00631305	0.0732064	no
comp19735_c0	comp19735_c0_seq1	817	817	Q9LT96	interleukin-1 receptor-associated kinase 4	GO:0016021(integral to membrane);GO:0005524(ATP binding);GO:0004674(protein serine/threonine kinase activity);GO:0004872(receptor activity)	-	K04733	ko04210(Apoptosis);ko04620(Toll-like receptor signaling pathway);ko04722(Neurotrophin signaling pathway);ko05140(Leishmaniasis);ko05142(Chagas disease)	766.21	701.39	701.06	1002.84	1002.56	1165.88	23.01	23.82	26.87	37.57	44.52	44.23	722.887	1057.09	24.5667	42.1067	-0.777347	0.777347	0.00633448	0.0732818	no
comp3305_c0	comp3305_c0_seq1	1249	1249	-	-	-	-	-	-	535.72	464.38	396.51	170	193.28	236	10.17	9.97	9.61	4.03	5.43	5.66	465.537	199.76	9.91667	5.04	0.976432	0.976432	0.00635472	0.0733529	no
comp17661_c0	comp17661_c0_seq1	1581	1581	Q9ZS34	geranylgeranyl reductase	GO:0009507(chloroplast);GO:0005488(binding);GO:0045550(geranylgeranyl reductase activity);GO:0016628(oxidoreductase activity, acting on the CH-CH group of donors, NAD or NADP as acceptor);GO:0015995(chlorophyll biosynthetic process);GO:0033385(geranylgera	-	K10960	ko00860(Porphyrin and chlorophyll metabolism);ko00900(Terpenoid backbone biosynthesis)	6708.18	5404.56	5178.4	3468.36	2088.91	2770.37	99.31	90.5	97.85	64.07	45.74	51.82	5763.71	2775.88	95.8867	53.8767	0.83167	0.83167	0.00636738	0.0734108	no
comp12368_c0	comp12368_c0_seq1,comp12368_c0_seq2,comp12368_c0_seq3	1418	1349.76	Q8BZI6	-	-	[S] Function unknown	-	-	1512.91	1482.99	1395.53	901.83	676.1	799.92	26.46	29.22	31.16	19.76	17.55	17.81	1463.81	792.617	28.9467	18.3733	0.655784	0.655784	0.00637008	0.0734242	no
comp9027_c0	comp9027_c0_seq1,comp9027_c0_seq2	3227	2500.56	Q8N9R8	-	GO:0005737(cytoplasm);GO:0016021(integral to membrane);GO:0005634(nucleus);GO:0005515(protein binding);GO:0003714(transcription corepressor activity);GO:0030336(negative regulation of cell migration);GO:0035024(negative regulation of Rho protein signal tr	-	-	-	1743.1	1550.43	1202.49	1859.26	1530.43	1898	16.29	16.41	14.39	20.35	20.15	21.32	1498.67	1762.56	15.6967	20.6067	-0.392653	0.392653	0.00637314	0.0734243	no
comp18546_c0	comp18546_c0_seq1	1972	1972	Q9FK12	EREBP-like factor	GO:0005737(cytoplasm);GO:0005634(nucleus);GO:0003677(DNA binding);GO:0005515(protein binding);GO:0003700(sequence-specific DNA binding transcription factor activity);GO:0048825(cotyledon development);GO:0009736(cytokinin mediated signaling pathway);GO:000	-	K09286	-	8219.83	6791.11	7047.08	10055.1	8148.93	8582.86	96.62	90.29	105.73	147.47	141.66	127.46	7352.67	8928.96	97.5467	138.863	-0.509501	0.509501	0.00637242	0.0734243	no
comp27055_c0	comp27055_c0_seq1	1761	1761	Q9SUI2	1-phosphatidylinositol-4-phosphate 5-kinase	GO:0005886(plasma membrane);GO:0016308(1-phosphatidylinositol-4-phosphate 5-kinase activity);GO:0005524(ATP binding)	[R] General function prediction only	K00889	ko00562(Inositol phosphate metabolism);ko04070(Phosphatidylinositol signaling system);ko04144(Endocytosis);ko04666(Fc gamma R-mediated phagocytosis);ko04810(Regulation of actin cytoskeleton)	824.69	749.46	614.12	301.87	299.95	418	10.91	11.21	10.37	4.98	5.87	6.98	729.423	339.94	10.83	5.94333	0.865689	0.865689	0.00637759	0.0734402	no
comp22665_c0	comp22665_c0_seq1	763	763	-	-	-	-	-	-	905.53	850.17	735.12	425.64	333	503.55	29.32	31.14	30.38	17.2	15.95	20.6	830.273	420.73	30.28	17.9167	0.757063	0.757063	0.00637702	0.0734402	no
comp13506_c0	comp13506_c0_seq1,comp13506_c0_seq2,comp13506_c0_seq3,comp13506_c0_seq4	1662	1457.35	-	-	-	[A] RNA processing and modification	-	-	244.01	223	164.36	285.98	295.02	322.16	3.96	4.05	3.28	5.7	6.96	6.58	210.457	301.053	3.76333	6.41333	-0.769063	0.769063	0.00638148	0.0734498	no
comp15890_c2	comp15890_c2_seq1,comp15890_c2_seq2,comp15890_c2_seq3,comp15890_c2_seq4,comp15890_c2_seq5	1834	1319.01	Q39056	molybdenum cofactor biosynthesis protein C	GO:0006777(Mo-molybdopterin cofactor biosynthetic process)	[H] Coenzyme transport and metabolism	K03637	-	745.51	709.74	630.18	351.15	392	455.94	13.33	14.4	14.03	7.85	9.74	9.68	695.143	399.697	13.92	9.09	0.614807	0.614807	0.00638002	0.0734498	no
comp13515_c0	comp13515_c0_seq1,comp13515_c0_seq2,comp13515_c0_seq3,comp13515_c0_seq4,comp13515_c0_seq5,comp13515_c0_seq6,comp13515_c0_seq7,comp13515_c0_seq8	2888	2384.83	-	cyclin-dependent kinase 3	-	[R] General function prediction only	K02088	-	982.58	910.16	790.84	1534.74	1150.3	1515.15	9.55	10.04	9.98	18.19	16.03	18.07	894.527	1400.06	9.85667	17.43	-0.822401	0.822401	0.00639178	0.0735255	no
comp5032_c0	comp5032_c0_seq1	1452	1452	O04373	-	GO:0005788(endoplasmic reticulum lumen);GO:0005886(plasma membrane);GO:0010179(IAA-Ala conjugate hydrolase activity);GO:0009611(response to wounding)	-	K01463	-	1669.96	1632.01	1259.82	942.16	773.82	1043.96	27.04	29.89	26.03	19.03	18.53	21.35	1520.6	919.98	27.6533	19.6367	0.493903	0.493903	0.00642292	0.0736657	no
comp29105_c0	comp29105_c0_seq1	2230	2230	Q6CCU8	-	GO:0032585(multivesicular body membrane);GO:0005774(vacuolar membrane);GO:0006914(autophagy);GO:0015031(protein transport)	-	-	-	596.45	553.03	548.92	698.05	609.01	664.01	6.17	6.47	7.25	9.01	9.32	8.68	566.133	657.023	6.63	9.00333	-0.44145	0.44145	0.00642327	0.0736657	no
comp19854_c0	comp19854_c0_seq1	1288	1288	-	-	-	-	-	-	3481.17	3094.66	3094.08	1994.43	1530.51	1946.4	63.97	64.33	72.58	45.73	41.6	45.19	3223.3	1823.78	66.96	44.1733	0.600124	0.600124	0.00642995	0.0737	no
comp73070_c0	comp73070_c0_seq1	211	211	-	-	-	-	-	-	33	29	24	15	16	17	5.37	5.34	4.99	3.05	3.85	3.5	28.6667	16	5.23333	3.46667	0.594181	0.594181	0.00642894	0.0737	no
comp4261_c0	comp4261_c0_seq1,comp4261_c0_seq2,comp4261_c0_seq3,comp4261_c0_seq4	2098	1476.4	-	-	-	[I] Lipid transport and metabolism	-	-	16145.1	13392.1	14082	9532.45	8861.64	8615.47	372.95	340.08	419.26	203.9	254.68	196.04	14539.8	9003.19	377.43	218.207	0.790514	0.790514	0.00644891	0.0738011	no
comp19577_c0	comp19577_c0_seq1	7036	7036	-	-	-	[S] Function unknown	-	-	5535.87	4945.08	4799.49	7688.21	7713.53	8468.07	17.74	17.92	19.63	30.74	36.56	34.28	5093.48	7956.6	18.43	33.86	-0.877526	0.877526	0.00646419	0.0738509	no
comp11363_c0	comp11363_c0_seq1,comp11363_c0_seq2,comp11363_c0_seq3,comp11363_c0_seq4	2576	1978.16	-	-	-	-	-	-	1457.75	1287.07	1141	2383.85	2093.84	2079	17.43	17.14	17.45	32.64	34.88	30.5	1295.27	2185.56	17.34	32.6733	-0.91401	0.91401	0.00646747	0.0738509	no
comp28581_c0	comp28581_c0_seq1	2237	2237	Q9FH28	DnaJ homolog, subfamily B, member 12	GO:0016021(integral to membrane);GO:0031072(heat shock protein binding);GO:0051082(unfolded protein binding);GO:0006457(protein folding)	-	K09518	-	583.01	481.58	481.41	585	552.17	650.97	6.01	5.62	6.34	7.53	8.42	8.48	515.333	596.047	5.99	8.14333	-0.443063	0.443063	0.00646752	0.0738509	no
comp13476_c0	comp13476_c0_seq1,comp13476_c0_seq2	3285	2424.89	Q9LV11	H+-transporting ATPase	GO:0016021(integral to membrane);GO:0005886(plasma membrane);GO:0005524(ATP binding);GO:0008553(hydrogen-exporting ATPase activity, phosphorylative mechanism);GO:0046872(metal ion binding);GO:0006754(ATP biosynthetic process)	[P] Inorganic ion transport and metabolism	K01535	ko00190(Oxidative phosphorylation)	2453.18	2338.11	2174.96	3375.46	3276.39	3576.94	18.99	20.03	20.64	30.21	34.86	31.86	2322.08	3409.6	19.8867	32.31	-0.700179	0.700179	0.00647379	0.0738745	no
comp3658_c0	comp3658_c0_seq1,comp3658_c0_seq2	2231	2229.07	Q84K11	protein phosphatase 5	GO:0005789(endoplasmic reticulum membrane);GO:0016021(integral to membrane);GO:0031965(nuclear membrane);GO:0016607(nuclear speck);GO:0046872(metal ion binding);GO:0004629(phospholipase C activity);GO:0004722(protein serine/threonine phosphatase activity)	[R] General function prediction only	K04460	ko04010(MAPK signaling pathway)	335.94	309.62	285.65	490.76	390.34	530.96	3.48	3.62	3.77	6.35	5.98	6.96	310.403	470.687	3.62333	6.43	-0.827501	0.827501	0.00650507	0.0739048	no
comp14518_c0	comp14518_c0_seq1,comp14518_c0_seq2,comp14518_c0_seq3,comp14518_c0_seq4,comp14518_c0_seq5,comp14518_c0_seq6,comp14518_c0_seq7,comp14518_c0_seq8	1589	1308.29	-	-	-	[R] General function prediction only	-	-	512.94	527.08	484.63	976.62	753.73	798	9.43	10.97	11.23	23.1	20.85	18.73	508.217	842.783	10.5433	20.8933	-0.986712	0.986712	0.00649996	0.0739048	no
comp70408_c0	comp70408_c0_seq1	683	683	-	-	-	-	-	-	61	62	48	91	64	84	2.23	2.57	2.24	4.16	3.47	3.89	57	79.6667	2.34667	3.84	-0.710493	0.710493	0.00648369	0.0739048	no
comp2699_c0	comp2699_c0_seq1,comp2699_c0_seq2	3084	2724.41	Q9FPS2	ubiquitin carboxyl-terminal hydrolase 36/42	GO:0008234(cysteine-type peptidase activity);GO:0004221(ubiquitin thiolesterase activity);GO:0006511(ubiquitin-dependent protein catabolic process)	[O] Posttranslational modification, protein turnover, chaperones	K11855	-	764.75	757.02	615.26	1300.27	965.32	1071.16	6.11	6.39	5.91	13.27	11.92	11.32	712.343	1112.25	6.13667	12.17	-0.987802	0.987802	0.00649957	0.0739048	no
comp23070_c0	comp23070_c0_seq1	1282	1282	-	-	-	-	-	-	1432.06	1354.01	1250.12	912.9	618.94	724.25	26.45	28.28	29.47	21.04	16.91	16.9	1345.4	752.03	28.0667	18.2833	0.618329	0.618329	0.00650845	0.0739048	no
[truncated: 2,897 more rows]
