# Supplementary material for: Genome-wide identification of new reference genes for RT-qPCR normalization in CGMMV-infected Lagenaria siceraria
Source: PeerJ. 2018 Oct 12;6:e5642. doi: 10.7717/peerj.5642 (PMC6188008; doi:10.7717/peerj.5642)
Supplement: Table S3 — The RPKM > 40, RPKMmax/min < 2.0, and CV < 0.3, p < 0.05. All the selected internal RGs have only one transcript. [file peerj-06-5642-s008.xls]

## Sheet: Sheet1
gene_ID	transcript_id(s)	length	effective_length	Name	Annotation	GO_Term	KOG_des	KEGG_KO	KEGG_Pathway	L1_LCG_count	L2_LCG_count	L3_LCG_count	L1_LCK_count	L2_LCK_count	L3_LCK_count	L1_LCG_rpkm	L2_LCG_rpkm	L3_LCG_rpkm	L1_LCK_rpkm	L2_LCK_rpkm	L3_LCK_rpkm	mean_count_LCG	mean_count_LCK	mean_rpkm_LCG	mean_rpkm_LCK	log2fold_change	ABS(log2fold_change)	pvalue	FDR	significant	rpkm max	rpkm min	max/min	average	SD	CV
comp17564_c0	comp17564_c0_seq1	1859	1859	Q9XF61	prolyl 4-hydroxylase, beta polypeptide	GO:0005788(endoplasmic reticulum lumen);GO:0009055(electron carrier activity);GO:0003756(protein disulfide isomerase activity);GO:0015035(protein disulfide oxidoreductase activity);GO:0045454(cell redox homeostasis);GO:0006662(glycerol ether metabolic process)	[O] Posttranslational modification, protein turnover, chaperones	K09580	-	3596.73	3917.69	4717.44	3660.61	2632.29	6131.64	52.97	50.49	49.39	54.88	60.52	62.21	4077.29	4141.51	50.95	59.2033	-0.216596	0.216596	0.0467411	0.800877	no	62.21	49.39	1.25957	55.0767	5.26055	0.0955132
comp11127_c2	comp11127_c2_seq1	2096	2096	-	-	-	-	-	-	5326	5107.56	7857.16	6308.05	3807.51	9693.03	69.25	58.11	72.62	83.49	77.27	86.82	6096.91	6602.86	66.66	82.5267	-0.308039	0.308039	0.047087	0.800877	no	86.82	58.11	1.49406	74.5933	10.3918	0.139313
comp19078_c0	comp19078_c0_seq1	1715	1715	Q9Y7K5	-	GO:0005829(cytosol)	-	-	-	3793.27	3721.33	4722.61	2544.96	1763.71	4168.69	60.77	52.17	53.78	41.51	44.11	46.01	4079.07	2825.79	55.5733	43.8767	0.340939	0.340939	0.0299352	0.800877	no	60.77	41.51	1.46398	49.725	7.17257	0.144245
comp17353_c0	comp17353_c0_seq1	1836	1836	Q39010	-	GO:0005524(ATP binding);GO:0004674(protein serine/threonine kinase activity);GO:0009742(brassinosteroid mediated signaling pathway);GO:0032880(regulation of protein localization)	[G] Carbohydrate transport and metabolism	K00924	-	8359.34	8168.71	9832.08	5279.81	3592.01	9388.8	124.73	106.65	104.28	80.19	83.66	96.51	8786.71	6086.87	111.887	86.7867	0.366493	0.366493	0.0401668	0.800877	no	124.73	80.19	1.55543	99.3367	16.3895	0.16499
comp18589_c0	comp18589_c0_seq1	1013	1013	P34727	Arf/Sar family, other	GO:0005794(Golgi apparatus);GO:0005525(GTP binding);GO:0015031(protein transport);GO:0007264(small GTPase mediated signal transduction);GO:0016192(vesicle-mediated transport)	[U] Intracellular trafficking, secretion, and vesicular transport	K07977	-	2586.52	2363.94	3371.06	1672.82	1287.21	2557.72	72.42	57.91	67.09	47.68	56.25	49.33	2773.84	1839.25	65.8067	51.0867	0.365287	0.365287	0.0524287	0.800877	no	72.42	47.68	1.51888	58.4467	9.73765	0.166607
comp17031_c0	comp17031_c0_seq1	1365	1365	P59169	histone H3	GO:0000786(nucleosome);GO:0005634(nucleus);GO:0003677(DNA binding);GO:0006334(nucleosome assembly)	[B] Chromatin structure and dynamics	K11253	ko05322(Systemic lupus erythematosus)	25843	26555.5	33339.9	16035.6	12043.7	27195.3	526.28	473.19	482.61	332.43	382.83	381.52	28579.5	18424.9	494.027	365.593	0.434349	0.434349	0.00528306	0.800877	no	526.28	332.43	1.58313	429.81	74.8305	0.174101
comp17102_c0	comp17102_c0_seq1	484	484	P0CG85	ubiquitin C	GO:0005737(cytoplasm);GO:0005634(nucleus)	[O] Posttranslational modification, protein turnover, chaperones ;[R] General function prediction only	K08770	ko03320(PPAR signaling pathway)	17316.6	15859.5	21412.9	10600.4	7981.62	16635.3	1110.4	889.85	976	691.95	798.88	734.86	18196.3	11739.1	992.083	741.897	0.419243	0.419243	0.0416286	0.800877	no	1110.4	691.95	1.60474	866.99	157.728	0.181926
comp18435_c0	comp18435_c0_seq1	1735	1735	Q8RXN3	-	GO:0031969(chloroplast membrane);GO:0016021(integral to membrane);GO:0005739(mitochondrion);GO:0009528(plastid inner membrane);GO:0015121(phosphoenolpyruvate:phosphate antiporter activity);GO:0015120(phosphoglycerate transmembrane transporter activity);GO:0008643(carbohydrate transport)	[G] Carbohydrate transport and metabolism ;[E] Amino acid transport and metabolism	-	-	3039.81	3110.9	4411.94	4303.57	2438.66	6651.29	48.11	43.09	49.64	69.34	60.25	72.53	3520.88	4464.51	46.9467	67.3733	-0.521155	0.521155	0.0155261	0.800877	no	72.53	43.09	1.68322	57.16	12.0876	0.21147
comp17694_c0	comp17694_c0_seq1	2097	2097	Q39817	calnexin	GO:0005789(endoplasmic reticulum membrane);GO:0016021(integral to membrane);GO:0005509(calcium ion binding);GO:0005529(sugar binding);GO:0051082(unfolded protein binding);GO:0006457(protein folding)	[O] Posttranslational modification, protein turnover, chaperones	K08054	ko04145(Phagosome);ko04612(Antigen processing and presentation)	9361.49	10884.1	13079.4	13179.7	9492.86	18933.2	121.66	123.77	120.82	174.36	192.56	169.5	11108.3	13868.6	122.083	178.807	-0.550534	0.550534	0.0138835	0.800877	no	192.56	120.82	1.59378	150.445	32.0202	0.212837
comp18229_c0	comp18229_c0_seq1	1975	1975	Q39193	-	GO:0005829(cytosol);GO:0005634(nucleus);GO:0005524(ATP binding);GO:0005515(protein binding);GO:0004674(protein serine/threonine kinase activity);GO:0009738(abscisic acid mediated signaling pathway);GO:0009789(positive regulation of abscisic acid mediated signaling pathway);GO:0010029(regulation of seed germination);GO:0009739(response to gibberellin stimulus);GO:0009651(response to salt stress)	[T] Signal transduction mechanisms	K00924	-	9178.23	8115.81	10087.4	4543.67	3983.13	7569.19	126.93	98.21	99.16	63.97	85.98	72.11	9127.14	5365.33	108.1	74.02	0.546379	0.546379	0.0473272	0.800877	no	126.93	63.97	1.98421	91.06	22.4596	0.246646
comp17092_c0	comp17092_c0_seq1	1934	1934	Q07346	glutamate decarboxylase	GO:0005516(calmodulin binding);GO:0004351(glutamate decarboxylase activity);GO:0030170(pyridoxal phosphate binding);GO:0006536(glutamate metabolic process)	[E] Amino acid transport and metabolism	K01580	ko00250(Alanine, aspartate and glutamate metabolism);ko00410(beta-Alanine metabolism);ko00430(Taurine and hypotaurine metabolism);ko00650(Butanoate metabolism);ko04940(Type I diabetes mellitus)	58526	73303.4	90394.8	31510.7	28959	66939.6	827.25	906.61	908.22	453.4	638.92	651.81	74074.7	42469.8	880.693	581.377	0.599167	0.599167	0.0289137	0.800877	no	908.22	453.4	2.00313	731.035	180.733	0.247228
