# Supplementary material for: Genome-wide identification of new reference genes for RT-qPCR normalization in CGMMV-infected Lagenaria siceraria
Source: PeerJ. 2018 Oct 12;6:e5642. doi: 10.7717/peerj.5642 (PMC6188008; doi:10.7717/peerj.5642)
Supplement: Table S4 — The RPKM > 40, RPKMmax/min < 2.0, and CV < 0.2, p < 0.05. All the selected internal RGs have only one transcript, and are ranked from small to large according to their RPKMmax/min values. [file peerj-06-5642-s009.xlsx]

## Sheet: Sheet1
gene_ID	transcript_id(s)	length	effective_length	Name	Annotation	GO_Term	KOG_des	KEGG_KO	KEGG_Pathway	F1_FCG_count	F2_FCG_count	F3_FCG_count	F1_FCK_count	F2_FCK_count	F3_FCK_count	F1_FCG_rpkm	F2_FCG_rpkm	F3_FCG_rpkm	F1_FCK_rpkm	F2_FCK_rpkm	F3_FCK_rpkm	mean_count_FCG	mean_count_FCK	mean_rpkm_FCG	mean_rpkm_FCK	log2fold_change	ABS(log2fold_change)	pvalue	FDR	significant	rpkm max	rpkm min	max/min	Average	SD	CV
comp18112_c0	comp18112_c0_seq1	1496	1496	-	prolyl 4-hydroxylase	-	[E] Amino acid transport and metabolism	K00472	ko00330(Arginine and proline metabolism)	3217.77	2876.67	2406.57	2842.68	2490.89	3091.11	50.48	51.05	48.19	55.65	57.8	61.27	2833.67	2808.23	49.9067	58.24	-0.222778	0.222778	0.0198376	0.110366	no	61.27	48.19	1.27143	54.0733	4.99664	0.0924049
comp17950_c0	comp17950_c0_seq1	2612	2612	B9DHT4	BTB/POZ domain-containing protein 11	GO:0005634(nucleus);GO:0005886(plasma membrane);GO:0005515(protein binding);GO:0010187(negative regulation of seed germination);GO:0009737(response to abscisic acid stimulus);GO:0009651(response to salt stress)	[S] Function unknown	K10483	-	9788.14	9255.42	7909.94	9247.28	8135.21	9709.64	86.04	92.02	88.75	101.43	105.76	107.84	8984.5	9030.71	88.9367	105.01	-0.239676	0.239676	0.00337091	0.0587687	no	107.84	86.04	1.25337	96.9733	9.23957	0.0952795
comp4224_c1	comp4224_c1_seq1	1614	1614	Q5HZL1	-	GO:0005622(intracellular);GO:0004527(exonuclease activity);GO:0003676(nucleic acid binding);GO:0008270(zinc ion binding)	[L] Replication, recombination and repair	K01175	-	13440.4	12242.3	9880.23	8672.88	8233.64	8569.57	194.7	200.6	182.7	156.77	176.41	156.85	11854.3	8492.03	192.667	163.343	0.238199	0.238199	0.0268764	0.12461	no	200.6	156.77	1.27958	178.005	18.5057	0.103962
comp4452_c0	comp4452_c0_seq1	489	489	Q9FI56	ATP-dependent Clp protease ATP-binding subunit ClpC	GO:0005618(cell wall);GO:0009570(chloroplast stroma);GO:0009535(chloroplast thylakoid membrane);GO:0005739(mitochondrion);GO:0031897(Tic complex);GO:0005524(ATP binding);GO:0004176(ATP-dependent peptidase activity);GO:0003677(DNA binding);GO:0004518(nuclease activity);GO:0009658(chloroplast organization);GO:0006289(nucleotide-excision repair);GO:0045037(protein import into chloroplast stroma);GO:…	[O] Posttranslational modification, protein turnover, chaperones	K03696	-	885.49	832.7	776.87	829.01	758	938.95	47.6	50.63	53.31	55.61	60.27	63.77	831.687	841.987	50.5133	59.8833	-0.24549	0.24549	0.0368942	0.143872	no	63.77	47.6	1.33971	55.1983	6.02553	0.109161
comp18144_c0	comp18144_c0_seq1	2393	2393	Q8RY59	-	GO:0005737(cytoplasm);GO:0016363(nuclear matrix);GO:0003950(NAD+ ADP-ribosyltransferase activity);GO:0005515(protein binding);GO:0009816(defense response to bacterium, incompatible interaction);GO:0009790(embryo development);GO:0009873(ethylene mediated signaling pathway);GO:0044419(interspecies interaction between organisms);GO:0009867(jasmonic acid mediated signaling pathway);GO:0010102(lateral…	-	-	-	8945.38	8282.39	7194.75	9352.06	7388.74	8556.47	86.06	90.12	88.35	112.26	105.13	104	8140.84	8432.42	88.1767	107.13	-0.280894	0.280894	0.00855683	0.0815192	no	112.26	86.06	1.30444	97.6533	10.8374	0.110978
comp18719_c0	comp18719_c0_seq1	2713	2713	Q4KLL4	-	GO:0016021(integral to membrane)	[U] Intracellular trafficking, secretion, and vesicular transport	-	-	5998.68	5555.04	5556.43	6042.57	4937.76	6402.25	50.71	53.12	59.96	63.74	61.74	68.38	5703.38	5794.19	54.5967	64.62	-0.243168	0.243168	0.0477135	0.160882	no	68.38	50.71	1.34845	59.6083	6.63264	0.11127
comp20335_c0	comp20335_c0_seq1	831	831	Q8LBM4	-	GO:0005739(mitochondrion);GO:0051536(iron-sulfur cluster binding);GO:0046872(metal ion binding);GO:0005198(structural molecule activity);GO:0016226(iron-sulfur cluster assembly)	[P] Inorganic ion transport and metabolism	-	-	1934.71	1838.01	1466.19	1258.75	1148.96	1271.17	57.02	61.27	55.16	46.29	50.08	47.33	1746.3	1226.29	57.8167	47.9	0.27146	0.27146	0.0145711	0.0983721	no	61.27	46.29	1.32361	52.8583	5.91266	0.111859
comp17829_c0	comp17829_c0_seq1	1047	1047	P54168	-	GO:0046872(metal ion binding);GO:0008081(phosphoric diester hydrolase activity)	-	K06950	-	6157.39	5013.35	4661.4	5595.94	5034.02	5791.98	141.18	130.02	136.42	160.1	170.71	167.79	5277.38	5473.98	135.873	166.2	-0.290658	0.290658	0.00258124	0.0553163	no	170.71	130.02	1.31295	151.037	17.3341	0.114768
comp18758_c0	comp18758_c0_seq1	1845	1845	O80507	casein kinase 2, beta polypeptide	GO:0005737(cytoplasm);GO:0005634(nucleus);GO:0005956(protein kinase CK2 complex);GO:0019887(protein kinase regulator activity);GO:0004674(protein serine/threonine kinase activity);GO:0007623(circadian rhythm);GO:0048573(photoperiodism, flowering);GO:0042753(positive regulation of circadian rhythm)	[T] Signal transduction mechanisms ;[D] Cell cycle control, cell division, chromosome partitioning ;[K] Transcription	K03115	ko04310(Wnt signaling pathway);ko04520(Adherens junction);ko04530(Tight junction);ko04712(Circadian rhythm - plant)	5032.59	4700.86	4315.41	3595.39	2652.23	3696.37	63.4	66.98	69.39	56.51	49.41	58.83	4682.95	3314.66	66.59	54.9167	0.278061	0.278061	0.033338	0.137324	no	69.39	49.41	1.40437	60.7533	7.35859	0.121122
comp15199_c0	comp15199_c0_seq1	437	437	P47192	vesicle-associated membrane protein 72	GO:0005768(endosome);GO:0016021(integral to membrane);GO:0005886(plasma membrane);GO:0009506(plasmodesma);GO:0005774(vacuolar membrane);GO:0015031(protein transport);GO:0016192(vesicle-mediated transport)	[U] Intracellular trafficking, secretion, and vesicular transport	K08511	-	1879.26	1697.76	1468.04	1860.06	1504.58	1951.11	115.5	118.02	115.17	142.64	136.76	151.51	1681.69	1771.92	116.23	143.637	-0.305442	0.305442	0.0199414	0.110525	no	151.51	115.17	1.31553	129.933	15.7596	0.12129
comp19688_c0	comp19688_c0_seq1	1336	1336	Q8VZU2	syntaxin 1B/2/3	GO:0016021(integral to membrane);GO:0005886(plasma membrane);GO:0009506(plasmodesma);GO:0005484(SNAP receptor activity);GO:0006886(intracellular protein transport);GO:0009737(response to abscisic acid stimulus);GO:0016192(vesicle-mediated transport)	[U] Intracellular trafficking, secretion, and vesicular transport	K08486	ko04130(SNARE interactions in vesicular transport)	4865.15	3780.38	3610.61	3193.57	2627.67	2740.68	86	75.59	81.47	70.44	68.7	61.21	4085.38	2853.97	81.02	66.7833	0.27879	0.27879	0.0263858	0.123734	no	86	61.21	1.405	73.9017	9.01797	0.122027
comp17000_c0	comp17000_c0_seq1	1651	1651	Q8BZJ7	-	-	[S] Function unknown	-	-	72648.7	60305.3	60840.6	45691.7	39914.3	49435	1027.73	964.97	1098.63	806.55	835.11	883.6	64598.2	45013.7	1030.44	841.753	0.291796	0.291796	0.0211086	0.112875	no	1098.63	806.55	1.36214	936.098	114.354	0.12216
comp17647_c0	comp17647_c0_seq1	2133	2133	P48724	translation initiation factor eIF-5	GO:0005525(GTP binding);GO:0003743(translation initiation factor activity);GO:0016070(RNA metabolic process)	[J] Translation, ribosomal structure and biogenesis	K03262	-	13310.6	13117.2	11801.8	9193.02	7818.54	9530.36	144.22	160.76	163.22	124.29	125.29	130.47	12743.2	8847.31	156.067	126.683	0.300936	0.300936	0.0294049	0.129467	no	163.22	124.29	1.31322	141.375	17.4964	0.123759
comp17987_c0	comp17987_c0_seq1	1697	1697	-	-	-	-	-	-	5483.09	4762.97	4474.27	3613.31	2919.66	3514.82	75.37	74.05	78.5	61.97	59.36	61.04	4906.78	3349.26	75.9733	60.79	0.321659	0.321659	0.00161894	0.0477876	no	78.5	59.36	1.32244	68.3817	8.4823	0.124044
comp18530_c0	comp18530_c0_seq1	2645	2645	Q9ASQ5	interleukin-1 receptor-associated kinase 4	-	[T] Signal transduction mechanisms	K04733	ko04210(Apoptosis);ko04620(Toll-like receptor signaling pathway);ko04722(Neurotrophin signaling pathway);ko05140(Leishmaniasis);ko05142(Chagas disease)	6084.84	5103.93	4696.65	6224.86	4983.29	5574.88	52.8	50.09	52.02	67.4	63.95	61.12	5295.14	5594.34	51.6367	64.1567	-0.313203	0.313203	0.0103238	0.0868029	no	67.4	50.09	1.34558	57.8967	7.19446	0.124264
comp18701_c0	comp18701_c0_seq1	849	849	Q39255	S-phase kinase-associated protein 1	GO:0005829(cytosol);GO:0005634(nucleus);GO:0009524(phragmoplast);GO:0005886(plasma membrane);GO:0005819(spindle);GO:0005515(protein binding);GO:0009734(auxin mediated signaling pathway);GO:0007059(chromosome segregation);GO:0009873(ethylene mediated signaling pathway);GO:0044419(interspecies interaction between organisms);GO:0007275(multicellular organismal development);GO:0045910(negative regula…	[O] Posttranslational modification, protein turnover, chaperones	K03094	ko04110(Cell cycle);ko04111(Cell cycle - yeast);ko04114(Oocyte meiosis);ko04120(Ubiquitin mediated proteolysis);ko04310(Wnt signaling pathway);ko04350(TGF-beta signaling pathway)	2854.74	2555.09	2106.21	1683.19	1586.55	1882.75	82.18	83.19	77.39	60.46	67.55	68.48	2505.35	1717.5	80.92	65.4967	0.305075	0.305075	0.0100059	0.0858493	no	83.19	60.46	1.37595	73.2083	9.105	0.124371
comp18740_c0	comp18740_c0_seq1	1504	1504	Q94AT1	protein phosphatase	GO:0008287(protein serine/threonine phosphatase complex);GO:0046872(metal ion binding);GO:0004722(protein serine/threonine phosphatase activity);GO:0006470(protein dephosphorylation)	[T] Signal transduction mechanisms	K01090	-	4526.6	3914.1	3877.74	2801.07	2615.22	3130.48	70.62	69.07	77.22	54.53	60.34	61.71	4106.15	2848.92	72.3033	58.86	0.296775	0.296775	0.0161391	0.102193	no	77.22	54.53	1.4161	65.5817	8.21716	0.125297
comp18415_c0	comp18415_c0_seq1	939	939	-	-	-	-	-	-	3317.73	3152.96	2440.34	2084.06	1781.38	2276.71	85.57	91.98	80.34	67.07	67.95	74.19	2970.34	2047.38	85.9633	69.7367	0.301804	0.301804	0.02093	0.112683	no	91.98	67.07	1.3714	77.85	9.93045	0.127559
comp17907_c0	comp17907_c0_seq1	1975	1975	Q93ZG7	-	GO:0005737(cytoplasm);GO:0005635(nuclear envelope);GO:0005886(plasma membrane);GO:0005524(ATP binding);GO:0008026(ATP-dependent helicase activity);GO:0003723(RNA binding);GO:0008186(RNA-dependent ATPase activity);GO:0016973(poly(A)+ mRNA export from nucleus);GO:0009737(response to abscisic acid stimulus);GO:0009409(response to cold);GO:0009408(response to heat)	[A] RNA processing and modification	K01529	-	9431.9	8946.49	8131.26	5856.74	5579.59	6769.77	110.69	118.76	121.81	85.76	96.84	100.38	8836.55	6068.7	117.087	94.3267	0.311839	0.311839	0.0168607	0.103802	no	121.81	85.76	1.42036	105.707	13.8521	0.131043
comp18039_c0	comp18039_c0_seq1	1142	1142	O48964	isopentenyl-diphosphate delta-isomerase	GO:0016787(hydrolase activity);GO:0004452(isopentenyl-diphosphate delta-isomerase activity);GO:0046872(metal ion binding);GO:0015995(chlorophyll biosynthetic process);GO:0008299(isoprenoid biosynthetic process);GO:0015979(photosynthesis)	[Q] Secondary metabolites biosynthesis, transport and catabolism	K01823	ko00900(Terpenoid backbone biosynthesis)	5576.04	5025.58	4342.85	3596.44	3079.43	3282.57	116.48	118.74	115.8	93.74	95.14	86.64	4981.49	3319.48	117.007	91.84	0.349396	0.349396	0.00607132	0.0723634	no	118.74	86.64	1.3705	104.423	14.1161	0.135181
comp17892_c0	comp17892_c0_seq1	2993	2993	P35016	heat shock protein 90kDa beta	GO:0005788(endoplasmic reticulum lumen);GO:0005524(ATP binding);GO:0051082(unfolded protein binding);GO:0006457(protein folding);GO:0006950(response to stress)	[O] Posttranslational modification, protein turnover, chaperones	K09487	ko04621(NOD-like receptor signaling pathway);ko04626(Plant-pathogen interaction);ko05200(Pathways in cancer);ko05215(Prostate cancer)	9651.06	8591.35	6781.74	8828.04	8488.8	9073.78	73.76	74.27	66.16	84.19	95.95	87.62	8341.38	8796.87	71.3967	89.2533	-0.322049	0.322049	0.0174247	0.104914	no	95.95	66.16	1.45027	80.325	10.8877	0.135545
comp20034_c0	comp20034_c0_seq1	1302	1302	P24068	extracellular signal-regulated kinase 1/2	GO:0005634(nucleus);GO:0046983(protein dimerization activity);GO:0043565(sequence-specific DNA binding);GO:0003700(sequence-specific DNA binding transcription factor activity)	-	K04371	ko04010(MAPK signaling pathway);ko04012(ErbB signaling pathway);ko04013(MAPK signaling pathway - fly);ko04062(Chemokine signaling pathway);ko04114(Oocyte meiosis);ko04150(mTOR signaling pathway);ko04270(Vascular smooth muscle contraction);ko04320(Dorso-ventral axis formation);ko04350(TGF-beta signaling pathway);ko04360(Axon guidance);ko04370(VEGF signaling pathway);ko04510(Focal adhesion);ko04520…	2998.32	2562.18	2676.37	1970.96	1785.63	1832.99	54.47	52.65	62.06	44.68	47.98	42.07	2745.62	1863.19	56.3933	44.91	0.328488	0.328488	0.0367516	0.143596	no	62.06	42.07	1.47516	50.6517	7.2824	0.143774
comp19078_c0	comp19078_c0_seq1	1715	1715	Q9Y7K5	-	GO:0005829(cytosol)	-	-	-	4940.59	4608.92	3637.6	3191.31	2440.56	3135.54	67.17	70.87	63.12	54.14	49.07	53.86	4395.7	2922.47	67.0533	52.3567	0.356936	0.356936	0.00774562	0.0783339	no	70.87	49.07	1.44426	59.705	8.6056	0.144135
comp18665_c0	comp18665_c0_seq1	1502	1502	Q9SHI7	ubiquitin-conjugating enzyme E2 J2	GO:0016021(integral to membrane);GO:0005524(ATP binding);GO:0004842(ubiquitin-protein ligase activity);GO:0006511(ubiquitin-dependent protein catabolic process)	[O] Posttranslational modification, protein turnover, chaperones	K04554	ko04120(Ubiquitin mediated proteolysis);ko05012(Parkinson's disease)	4426.95	4226.23	3918.17	3306.97	2309.53	2895.54	69.16	74.68	78.13	64.47	53.36	57.15	4190.45	2837.35	73.99	58.3267	0.343175	0.343175	0.0217017	0.114189	no	78.13	53.36	1.46421	66.1583	9.72366	0.146976
comp17965_c0	comp17965_c0_seq1	2225	2225	Q96321	-	GO:0005618(cell wall);GO:0005829(cytosol);GO:0005643(nuclear pore);GO:0005730(nucleolus);GO:0005515(protein binding);GO:0008565(protein transporter activity);GO:0006606(protein import into nucleus)	[U] Intracellular trafficking, secretion, and vesicular transport	-	-	14316.1	12322.7	12242.6	10197.3	7270.09	8653.57	148.48	144.56	162.08	131.97	111.52	113.4	12960.5	8706.99	151.707	118.963	0.350768	0.350768	0.0190664	0.10855	no	162.08	111.52	1.45337	135.335	20.1634	0.148989
comp17208_c0	comp17208_c0_seq1	1748	1748	-	-	-	[J] Translation, ribosomal structure and biogenesis	-	-	34478.4	31768.2	27458.2	19739.8	18736.9	22452.7	459.49	478.88	467.1	328.26	369.31	378.07	31234.9	20309.8	468.49	358.547	0.385857	0.385857	0.0112557	0.0896848	no	478.88	328.26	1.45884	413.518	62.8275	0.151934
comp18035_c0	comp18035_c0_seq1	3285	3285	Q9FKZ0	-	GO:0005524(ATP binding);GO:0006915(apoptosis);GO:0006952(defense response)	-	-	-	8477.07	8562.21	6346.55	9778.3	7328.78	8373.67	58.9	67.29	56.28	84.77	75.31	73.51	7795.28	8493.58	60.8233	77.8633	-0.356319	0.356319	0.0241996	0.119389	no	84.77	56.28	1.50622	69.3433	10.7226	0.154631
comp18346_c0	comp18346_c0_seq1	1470	1470	A3RCV9	translation initiation factor eIF-4E	-	[J] Translation, ribosomal structure and biogenesis	K03259	ko04150(mTOR signaling pathway);ko04910(Insulin signaling pathway)	6182.51	6123.13	5132.75	3815.95	3669.67	3863.73	98.8	110.68	104.7	76.09	86.73	78.01	5812.8	3783.12	104.727	80.2767	0.383576	0.383576	0.00675202	0.0748233	no	110.68	76.09	1.45459	92.5017	14.3637	0.155281
comp19540_c0	comp19540_c0_seq1	980	980	Q13435	-	GO:0071013(catalytic step 2 spliceosome);GO:0005654(nucleoplasm);GO:0005689(U12-type spliceosomal complex);GO:0003676(nucleic acid binding);GO:0044419(interspecies interaction between organisms);GO:0000398(nuclear mRNA splicing, via spliceosome)	[A] RNA processing and modification	-	-	2105.59	1920.09	1828.24	2077.83	2043.92	2336.11	51.85	53.48	57.46	63.84	74.44	72.68	1951.31	2152.62	54.2633	70.32	-0.373957	0.373957	0.0227307	0.116483	no	74.44	51.85	1.43568	62.2917	9.67384	0.155299
comp18929_c0	comp18929_c0_seq1	1891	1891	-	-	-	[R] General function prediction only	-	-	3881.55	3330.93	3050.34	3740.13	3225.2	4374.75	47.66	46.26	47.81	57.3	58.57	67.87	3420.94	3780.03	47.2433	61.2467	-0.374521	0.374521	0.0494601	0.163224	no	67.87	46.26	1.46714	54.245	8.5113	0.156905
comp18326_c0	comp18326_c0_seq1	1785	1785	-	-	-	-	-	-	5476.38	4371.2	3849.18	3280.78	2610.85	2920.73	71.4	64.47	64.06	53.38	50.35	48.12	4565.59	2937.45	66.6433	50.6167	0.396848	0.396848	0.00766565	0.0781645	no	71.4	48.12	1.48379	58.63	9.30854	0.158767
comp18089_c0	comp18089_c0_seq1	927	927	Q9Y5Z4	-	GO:0005739(mitochondrion)	-	-	-	4496.04	4122.57	3956.49	2671.13	2449.3	3055.77	117.59	121.96	132.08	87.17	94.74	100.98	4191.7	2725.4	123.877	94.2967	0.393626	0.393626	0.00734861	0.077	no	132.08	87.17	1.5152	109.087	17.4276	0.159759
comp7631_c0	comp7631_c0_seq1	2274	2274	Q39030	p70 ribosomal S6 kinase	GO:0005634(nucleus);GO:0005524(ATP binding);GO:0004674(protein serine/threonine kinase activity);GO:0045727(positive regulation of translation);GO:0009409(response to cold);GO:0009408(response to heat);GO:0009651(response to salt stress)	[R] General function prediction only ;[T] Signal transduction mechanisms	K04688	ko04012(ErbB signaling pathway);ko04150(mTOR signaling pathway);ko04350(TGF-beta signaling pathway);ko04666(Fc gamma R-mediated phagocytosis);ko04910(Insulin signaling pathway);ko05221(Acute myeloid leukemia)	7411.51	6053.7	6081.27	4298.49	4227.42	4177.19	75.16	69.44	78.72	54.39	63.4	53.52	6515.49	4234.37	74.44	57.1033	0.382503	0.382503	0.0147312	0.0989006	no	78.72	53.52	1.47085	65.7717	10.5312	0.160117
comp17158_c0	comp17158_c0_seq1	584	584	P35133	ubiquitin-conjugating enzyme E2 D/E	GO:0005524(ATP binding);GO:0031625(ubiquitin protein ligase binding);GO:0004842(ubiquitin-protein ligase activity);GO:0006511(ubiquitin-dependent protein catabolic process)	[O] Posttranslational modification, protein turnover, chaperones	K06689	ko04120(Ubiquitin mediated proteolysis)	12862.4	11156.9	10710.1	6917.9	7052.09	8810.01	562.65	552.03	598.02	377.6	456.24	486.92	11576.5	7593.33	570.9	440.253	0.374904	0.374904	0.0409698	0.150687	no	598.02	377.6	1.58374	505.577	81.3895	0.160983
comp17947_c0	comp17947_c0_seq1	1540	1540	Q9Y5K3	choline-phosphate cytidylyltransferase	GO:0005783(endoplasmic reticulum);GO:0004105(choline-phosphate cytidylyltransferase activity)	[I] Lipid transport and metabolism	K00968	ko00440(Phosphonate and phosphinate metabolism);ko00564(Glycerophospholipid metabolism)	9408.37	8097.74	6900.35	6529.38	4352.73	5182.9	143.17	139.39	134.04	123.98	97.97	99.65	8135.49	5355	138.867	107.2	0.373395	0.373395	0.0528979	0.168417	no	143.17	97.97	1.46137	123.033	19.8495	0.161335
comp17649_c0	comp17649_c0_seq1	1453	1453	Q8LES0	-	-	[G] Carbohydrate transport and metabolism	-	-	6818.04	6040.19	5904.94	3919.87	3705.04	4473.45	110.3	110.53	121.94	79.13	88.65	91.44	6254.39	4032.79	114.257	86.4067	0.403064	0.403064	0.00651854	0.073943	no	121.94	79.13	1.54101	100.332	16.3421	0.162881
comp18459_c0	comp18459_c0_seq1	1110	1110	Q8GT74	E3 ubiquitin-protein ligase RNF115/126	GO:0009535(chloroplast thylakoid membrane);GO:0031351(integral to plastid membrane);GO:0005515(protein binding);GO:0008270(zinc ion binding);GO:0009299(mRNA transcription);GO:0009416(response to light stimulus)	[O] Posttranslational modification, protein turnover, chaperones	K11982	-	3306.94	2658.12	2367.94	2015.23	1462.74	1861.8	71.21	64.74	65.09	54.15	46.59	50.66	2777.67	1779.92	67.0133	50.4667	0.409117	0.409117	0.00549579	0.0697777	no	71.21	46.59	1.52844	58.74	9.65195	0.164316
comp5366_c0	comp5366_c0_seq1	1658	1658	Q9FGK3	calcium binding protein 39	GO:0005488(binding)	[S] Function unknown	K08272	ko04150(mTOR signaling pathway)	5717.67	5392.73	4990.09	3427.7	3185.36	3653.26	80.53	85.91	89.71	60.24	66.35	65.01	5366.83	3422.11	85.3833	63.8667	0.418891	0.418891	0.0039749	0.0623869	no	89.71	60.24	1.48921	74.625	12.3096	0.164953
comp17467_c0	comp17467_c0_seq1	1639	1639	Q0WQK2	-	GO:0016021(integral to membrane);GO:0005886(plasma membrane);GO:0016746(transferase activity, transferring acyl groups);GO:0008270(zinc ion binding)	[R] General function prediction only	-	-	7212.86	5858.46	5295.44	3692.09	3710.02	4255.04	102.82	94.46	96.36	65.67	78.22	76.64	6122.25	3885.72	97.88	73.51	0.413074	0.413074	0.0100126	0.085879	no	102.82	65.67	1.56571	85.695	14.3018	0.166891
comp18138_c0	comp18138_c0_seq1	1489	1489	Q6NRL0	prolyl-tRNA synthetase	-	-	K01881	ko00970(Aminoacyl-tRNA biosynthesis)	6781.59	6067.54	5804.06	4303.19	3554.81	3939.93	106.92	108.2	116.81	84.66	82.89	78.48	6217.73	3932.64	110.643	82.01	0.432045	0.432045	0.00311696	0.057597	no	116.81	78.48	1.4884	96.3267	16.1736	0.167903
comp17128_c0	comp17128_c0_seq1	2606	2606	Q9LS28	E1A/CREB-binding protein	GO:0005634(nucleus);GO:0006355(regulation of transcription, DNA-dependent);GO:0006351(transcription, DNA-dependent)	[K] Transcription	K04498	ko04110(Cell cycle);ko04310(Wnt signaling pathway);ko04330(Notch signaling pathway);ko04350(TGF-beta signaling pathway);ko04520(Adherens junction);ko04630(Jak-STAT signaling pathway);ko04720(Long-term potentiation);ko04916(Melanogenesis);ko05016(Huntington's disease);ko05200(Pathways in cancer);ko05211(Renal cell carcinoma);ko05215(Prostate cancer)	20942.8	17823.2	18160.7	21774.6	21093	20147.9	184.53	177.63	204.25	239.39	274.87	224.29	18975.6	21005.2	188.803	246.183	-0.382849	0.382849	0.0420973	0.152624	no	274.87	177.63	1.54743	217.493	36.5207	0.167916
comp18703_c0	comp18703_c0_seq1	1324	1324	-	-	-	[O] Posttranslational modification, protein turnover, chaperones	-	-	4522.06	3685.9	3130.34	2819.49	2217.64	2214.79	80.71	74.41	71.31	62.79	58.54	49.94	3779.43	2417.31	75.4767	57.09	0.402793	0.402793	0.0202821	0.11138	no	80.71	49.94	1.61614	66.2833	11.3023	0.170514
comp17419_c0	comp17419_c0_seq1	1905	1905	P0CH30	E3 ubiquitin-protein ligase RNF115/126	GO:0016874(ligase activity);GO:0008270(zinc ion binding)	[O] Posttranslational modification, protein turnover, chaperones	K11982	-	15948.1	13344.2	10778.5	8391.7	7544.73	9349.95	194.31	183.9	167.63	127.58	135.96	143.94	13356.9	8428.79	181.947	135.827	0.421749	0.421749	0.0116627	0.0908556	no	194.31	127.58	1.52304	158.887	27.1517	0.170887
comp18902_c0	comp18902_c0_seq1	1631	1631	Q9FG38	-	-	[U] Intracellular trafficking, secretion, and vesicular transport	-	-	4565.95	3970.74	3820.18	2398.98	2632.52	2876.22	65.42	64.35	69.87	42.89	55.79	52.07	4118.96	2635.91	66.5467	50.25	0.405243	0.405243	0.0351888	0.140642	no	69.87	42.89	1.62905	58.3983	10.0368	0.171868
comp17356_c0	comp17356_c0_seq1	2736	2736	Q94AH6	cullin 3	GO:0000794(condensed nuclear chromosome);GO:0031461(cullin-RING ubiquitin ligase complex);GO:0005829(cytosol);GO:0009524(phragmoplast);GO:0005819(spindle);GO:0031625(ubiquitin protein ligase binding);GO:0009734(auxin mediated signaling pathway);GO:0007049(cell cycle);GO:0009793(embryo development ending in seed dormancy);GO:0009873(ethylene mediated signaling pathway);GO:0009867(jasmonic acid med…	[D] Cell cycle control, cell division, chromosome partitioning	K03869	ko04120(Ubiquitin mediated proteolysis)	13582.6	12714.9	11833.5	16104.2	13237.1	15093.6	113.83	120.53	126.59	168.41	164.07	159.82	12710.3	14811.6	120.317	164.1	-0.447739	0.447739	0.00112056	0.0432683	no	168.41	113.83	1.47949	142.208	24.4697	0.17207
comp19665_c0	comp19665_c0_seq1	1624	1624	Q688R1	cation efflux system protein, CDF family	GO:0016021(integral to membrane);GO:0006829(zinc ion transport)	[P] Inorganic ion transport and metabolism	K03295	-	4691.89	3992.25	4319.34	3241.5	2508.88	2737.43	67.53	64.99	79.36	58.22	53.41	49.78	4334.49	2829.27	70.6267	53.8033	0.392517	0.392517	0.0424182	0.153117	no	79.36	49.78	1.59421	62.215	10.7519	0.172819
comp18454_c0	comp18454_c0_seq1	1196	1196	Q9S7V4	-	GO:0016021(integral to membrane);GO:0042538(hyperosmotic salinity response);GO:0009737(response to abscisic acid stimulus);GO:0009409(response to cold);GO:0009414(response to water deprivation)	[U] Intracellular trafficking, secretion, and vesicular transport	-	-	3119.25	2852.62	2893.76	1929.87	1771.15	1953.55	62.02	64.16	73.44	47.88	52.08	49.08	2955.21	1884.86	66.54	49.68	0.421557	0.421557	0.029426	0.129507	no	73.44	47.88	1.53383	58.11	10.0941	0.173707
comp18303_c0	comp18303_c0_seq1	2170	2170	-	-	-	-	-	-	7723.25	6507.84	6042.63	5021.23	3264.3	4733.29	82.2	78.35	82.1	66.69	51.39	63.65	6757.91	4339.61	80.8833	60.5767	0.41708	0.41708	0.0412172	0.151148	no	82.2	51.39	1.59953	70.73	12.3238	0.174238
comp18808_c0	comp18808_c0_seq1	1751	1751	-	-	-	[K] Transcription	-	-	8111.04	6359.3	6620.21	5230.85	3536.26	4898.07	107.9	95.69	112.42	86.83	69.58	82.33	7030.18	4555.06	105.337	79.58	0.40453	0.40453	0.0231339	0.11747	no	112.42	69.58	1.61569	92.4583	16.1557	0.174735
comp18093_c0	comp18093_c0_seq1	1191	1191	Q9SAI5	large subunit ribosomal protein L7e	GO:0022625(cytosolic large ribosomal subunit);GO:0005730(nucleolus);GO:0003735(structural constituent of ribosome);GO:0006412(translation)	[J] Translation, ribosomal structure and biogenesis	K02937	ko03010(Ribosome)	5316.05	3880.85	3790.32	5680.71	4217	4853.75	106.17	87.67	96.63	141.57	124.57	122.48	4329.07	4917.15	96.8233	129.54	-0.419971	0.419971	0.0158753	0.101797	no	141.57	87.67	1.61481	113.182	19.9801	0.176531
comp19045_c0	comp19045_c0_seq1	1105	1105	Q03389	translation initiation factor eIF-4E	GO:0005737(cytoplasm);GO:0005515(protein binding);GO:0003743(translation initiation factor activity);GO:0006417(regulation of translation)	[J] Translation, ribosomal structure and biogenesis	K03259	ko04150(mTOR signaling pathway);ko04910(Insulin signaling pathway)	4387.57	4107.71	3832.78	2354.73	2565.7	2945.9	94.94	100.54	105.86	63.58	82.11	80.54	4109.35	2622.11	100.447	75.41	0.413602	0.413602	0.0327816	0.136141	no	105.86	63.58	1.66499	87.9283	15.5631	0.176997
comp18214_c0	comp18214_c0_seq1	1512	1512	-	translocation protein SEC62	-	[U] Intracellular trafficking, secretion, and vesicular transport	K12275	ko03060(Protein export)	6358.6	5244.72	5295.16	3357.03	3323	3967.43	98.65	92.03	104.86	64.99	76.25	77.77	5632.83	3549.15	98.5133	73.0033	0.432357	0.432357	0.00975403	0.0851665	no	104.86	64.99	1.61348	85.7583	15.2049	0.1773
comp17432_c0	comp17432_c0_seq1	1467	1467	Q13442	-	GO:0008283(cell proliferation);GO:0007165(signal transduction)	[R] General function prediction only	-	-	18021.5	13824.7	12532.5	8976.58	9015.56	9767.85	288.62	250.43	256.2	179.39	213.55	197.65	14792.9	9253.33	265.083	196.863	0.429252	0.429252	0.0124391	0.0929715	no	288.62	179.39	1.6089	230.973	41.0194	0.177594
comp17624_c0	comp17624_c0_seq1	1628	1628	Q2KJD3	-	GO:0005681(spliceosomal complex);GO:0003723(RNA binding);GO:0000398(nuclear mRNA splicing, via spliceosome)	[S] Function unknown	-	-	15817.3	14406.2	13193.8	10295.8	7345.02	9407.71	227.07	233.93	241.77	184.43	155.95	170.64	14472.4	9016.18	234.257	170.34	0.459673	0.459673	0.00624781	0.0729383	no	241.77	155.95	1.5503	202.298	36.447	0.180164
comp19264_c0	comp19264_c0_seq1	2065	2065	Q0VD51	-	GO:0005789(endoplasmic reticulum membrane);GO:0000139(Golgi membrane);GO:0016021(integral to membrane);GO:0031902(late endosome membrane);GO:0005765(lysosomal membrane);GO:0005637(nuclear inner membrane);GO:0004842(ubiquitin-protein ligase activity);GO:0008270(zinc ion binding);GO:0051865(protein autoubiquitination)	[O] Posttranslational modification, protein turnover, chaperones	-	-	5888.22	5113.85	5287.48	3693.84	2801.36	3849.07	65.98	64.81	75.63	51.65	46.42	54.49	5429.85	3448.09	68.8067	50.8533	0.436206	0.436206	0.0161895	0.102235	no	75.63	46.42	1.62925	59.83	10.8399	0.181179
comp19069_c0	comp19069_c0_seq1	1447	1447	Q01484	ankyrin	GO:0016324(apical plasma membrane);GO:0016323(basolateral plasma membrane);GO:0005856(cytoskeleton);GO:0005829(cytosol);GO:0030017(sarcomere);GO:0005515(protein binding);GO:0007411(axon guidance);GO:0007165(signal transduction)	[R] General function prediction only	K10380	-	4771.3	4135.18	4177.19	3049.69	2419.23	2691.39	77.53	76	86.64	61.83	58.14	55.25	4361.22	2720.1	80.0567	58.4067	0.454888	0.454888	0.00928318	0.083641	no	86.64	55.25	1.56814	69.2317	12.5779	0.181679
comp18788_c0	comp18788_c0_seq1	2336	2336	Q9M028	-	GO:0016021(integral to membrane)	-	-	-	8211.74	7226.63	7158.7	4559.52	4480.04	4972.75	80.99	80.62	90.12	56.11	65.35	61.97	7532.36	4670.77	83.91	61.1433	0.456648	0.456648	0.00552195	0.0697777	no	90.12	56.11	1.60613	72.5267	13.2598	0.182826
comp17019_c0	comp17019_c0_seq1	1655	1655	Q9FUM1	elongation factor EF-1 gamma subunit	GO:0005853(eukaryotic translation elongation factor 1 complex);GO:0003746(translation elongation factor activity)	[O] Posttranslational modification, protein turnover, chaperones	K03233	-	87622.4	86583	85730.5	56176.2	56845.7	54428.4	1236.43	1381.94	1544.17	989.12	1186.35	970.39	86645.3	55816.8	1387.51	1048.62	0.40401	0.40401	0.0426492	0.15359	no	1544.17	970.39	1.59129	1218.07	222.846	0.18295
comp18596_c0	comp18596_c0_seq1	3122	3122	Q9LFE4	phosphatidylinositol 4-kinase	-	-	K00888	ko00562(Inositol phosphate metabolism);ko04070(Phosphatidylinositol signaling system)	7041.98	6474.72	4638.55	6969.95	6381.15	7681.83	51.54	53.6	43.34	63.66	69.08	71.04	6051.75	7010.98	49.4933	67.9267	-0.456744	0.456744	0.0111904	0.089444	no	71.04	43.34	1.63913	58.71	10.9346	0.186247
comp18182_c0	comp18182_c0_seq1	1321	1321	Q9FYF9	-	GO:0005634(nucleus);GO:0008270(zinc ion binding)	-	-	-	16577.6	12196.5	11314.8	9081.38	6602.76	9580.22	296.58	246.81	258.39	202.73	174.71	216.55	13362.9	8421.45	267.26	197.997	0.432768	0.432768	0.0250407	0.120935	no	296.58	174.71	1.69756	232.628	43.5007	0.186997
comp4147_c0	comp4147_c0_seq1	2458	2458	Q9SZJ5	glycine hydroxymethyltransferase	GO:0048046(apoplast);GO:0009507(chloroplast);GO:0022626(cytosolic ribosome);GO:0005739(mitochondrion);GO:0005634(nucleus);GO:0005886(plasma membrane);GO:0010319(stromule);GO:0004372(glycine hydroxymethyltransferase activity);GO:0008266(poly(U) RNA binding);GO:0005515(protein binding);GO:0030170(pyridoxal phosphate binding);GO:0006544(glycine metabolic process);GO:0006563(L-serine metabolic proces…	[E] Amino acid transport and metabolism	K00600	ko00260(Glycine, serine and threonine metabolism);ko00460(Cyanoamino acid metabolism);ko00670(One carbon pool by folate);ko00680(Methane metabolism)	4765.72	4321.56	4501.98	5300.56	4900.48	5828.88	44.6	45.74	53.78	61.89	67.82	68.92	4529.75	5343.31	48.04	66.21	-0.462813	0.462813	0.00891503	0.0827632	no	68.92	44.6	1.54529	57.125	10.7135	0.187544
comp4548_c0	comp4548_c0_seq1	1635	1635	Q9ZQ34	-	-	[S] Function unknown	-	-	7712.8	6777.54	6533.66	4834.95	3412.68	4797.11	110.23	109.56	119.19	86.22	72.13	86.62	7008	4348.25	112.993	81.6567	0.468595	0.468595	0.00813873	0.0797523	no	119.19	72.13	1.65243	97.325	18.2593	0.187612
comp17696_c0	comp17696_c0_seq1	1345	1345	Q54ZS8	-	GO:0005737(cytoplasm);GO:0005634(nucleus);GO:0000166(nucleotide binding);GO:0008143(poly(A) RNA binding);GO:0006378(mRNA polyadenylation)	[A] RNA processing and modification	-	-	7957.75	7024.97	6615.01	4306.71	4375.64	4482.11	139.68	139.47	148.21	94.33	113.59	99.4	7199.24	4388.15	142.453	102.44	0.47571	0.47571	0.00893123	0.0827768	no	148.21	94.33	1.57119	122.447	23.0246	0.188038
comp18747_c0	comp18747_c0_seq1	1415	1415	Q8GW78	-	GO:0009941(chloroplast envelope);GO:0009570(chloroplast stroma);GO:0043424(protein histidine kinase binding);GO:0019538(protein metabolic process)	-	-	-	3585.56	3655.36	3251.13	2119.67	2037.14	2308.73	59.65	68.78	69.04	44	50.12	48.53	3497.35	2155.18	65.8233	47.55	0.469154	0.469154	0.0119991	0.0916605	no	69.04	44	1.56909	56.6867	10.754	0.189709
comp19050_c0	comp19050_c0_seq1	1833	1833	B9DFG5	-	GO:0005886(plasma membrane);GO:0005524(ATP binding);GO:0004715(non-membrane spanning protein tyrosine kinase activity);GO:0019901(protein kinase binding)	[T] Signal transduction mechanisms	K00924	-	4114.23	3554.78	3367.68	5102.23	3617.01	4315.68	52.18	51	54.52	80.75	67.85	69.16	3678.9	4344.97	52.5667	72.5867	-0.465556	0.465556	0.0329812	0.136625	no	80.75	51	1.58333	62.5767	11.9033	0.190219
comp19365_c0	comp19365_c0_seq1	1405	1405	Q9M5P2	-	GO:0016021(integral to membrane);GO:0005886(plasma membrane);GO:0030658(transport vesicle membrane);GO:0015031(protein transport)	[U] Intracellular trafficking, secretion, and vesicular transport	-	-	3523.29	3171.84	3271.68	2224.1	1758.52	2204.69	59.05	60.13	70	46.52	43.59	46.69	3322.27	2062.44	63.06	45.6	0.467691	0.467691	0.0296848	0.130245	no	70	43.59	1.60587	54.33	10.3555	0.190603
comp11295_c1	comp11295_c1_seq1	519	519	P53492	actin, other eukaryote	GO:0005618(cell wall);GO:0005856(cytoskeleton);GO:0005829(cytosol);GO:0005739(mitochondrion);GO:0005730(nucleolus);GO:0005886(plasma membrane);GO:0009506(plasmodesma);GO:0005524(ATP binding);GO:0005515(protein binding);GO:0051301(cell division);GO:0009733(response to auxin stimulus);GO:0009416(response to light stimulus);GO:0009611(response to wounding);GO:0048767(root hair elongation);GO:0009845…	[Z] Cytoskeleton	K10355	-	1408.78	1471.06	1133.36	794.59	795.23	886.37	70.63	83.42	72.53	49.71	58.96	56.14	1337.73	825.397	75.5267	54.9367	0.459217	0.459217	0.0168768	0.103802	no	83.42	49.71	1.67813	65.2317	12.459	0.190997
comp18805_c0	comp18805_c0_seq1	2456	2456	Q9C6I8	-	GO:0016020(membrane);GO:0005730(nucleolus);GO:0005525(GTP binding);GO:0042254(ribosome biogenesis)	[R] General function prediction only	K06943	-	6071.09	5744.7	5078.57	6105.66	6327.76	7298.84	56.86	60.86	60.71	71.35	87.65	86.37	5631.45	6577.42	59.4767	81.79	-0.459601	0.459601	0.0438102	0.155607	no	87.65	56.86	1.54151	70.6333	13.5751	0.192191
comp18669_c0	comp18669_c0_seq1	1531	1531	O22892	-	-	[R] General function prediction only	-	-	4541.98	4433.97	3154	5440.87	4130.64	4605.94	69.55	76.79	61.64	103.95	93.54	89.11	4043.32	4725.82	69.3267	95.5333	-0.462594	0.462594	0.0134307	0.0952033	no	103.95	61.64	1.6864	82.43	15.8814	0.192665
comp17083_c0	comp17083_c0_seq1	1191	1191	Q9M2Z4	dihydrofolate reductase	GO:0009535(chloroplast thylakoid membrane);GO:0016021(integral to membrane);GO:0005634(nucleus);GO:0005886(plasma membrane);GO:0020037(heme binding);GO:0005496(steroid binding)	[R] General function prediction only	K00287	ko00670(One carbon pool by folate);ko00790(Folate biosynthesis)	32955.9	29339	26063.6	21109.1	14160.3	18684.5	658.21	662.8	664.46	526.07	418.28	471.5	29452.8	17984.7	661.823	471.95	0.487812	0.487812	0.0254691	0.121706	no	664.46	418.28	1.58855	566.887	109.461	0.193091
comp19394_c0	comp19394_c0_seq1	1107	1107	Q9LUL8	-	GO:0005618(cell wall);GO:0016021(integral to membrane);GO:0009506(plasmodesma);GO:0045330(aspartyl esterase activity);GO:0004857(enzyme inhibitor activity);GO:0030599(pectinesterase activity);GO:0042545(cell wall modification)	-	-	-	3216.79	2195.57	1962.39	3089.77	2370.86	3063.05	69.47	53.63	54.1	83.26	75.73	83.58	2458.25	2841.23	59.0667	80.8567	-0.453023	0.453023	0.0345905	0.139654	no	83.58	53.63	1.55846	69.9617	13.5214	0.193268
comp18509_c0	comp18509_c0_seq1	1291	1291	Q9LK32	-	GO:0005886(plasma membrane)	-	-	-	4765.41	4647.26	4606.77	3382.76	2323.56	3138.92	87.36	96.36	107.79	77.38	63	72.7	4673.15	2948.41	97.17	71.0267	0.45215	0.45215	0.026981	0.124745	no	107.79	63	1.71095	84.0983	16.3858	0.194842
comp17745_c0	comp17745_c0_seq1	2166	2166	Q9SRT0	-	GO:0005634(nucleus);GO:0005886(plasma membrane);GO:0000151(ubiquitin ligase complex);GO:0070696(transmembrane receptor protein serine/threonine kinase binding);GO:0004842(ubiquitin-protein ligase activity);GO:0009738(abscisic acid mediated signaling pathway)	[S] Function unknown	-	-	9090.99	8182.97	7605.49	5272.23	4584.17	4991.68	96.95	98.7	103.53	70.16	72.3	67.26	8293.15	4949.36	99.7267	69.9067	0.512549	0.512549	0.000411365	0.0318509	no	103.53	67.26	1.53925	84.8167	16.5522	0.195153
comp19433_c0	comp19433_c0_seq1	2376	2376	P52481	-	GO:0005886(plasma membrane);GO:0003779(actin binding);GO:0030036(actin cytoskeleton organization);GO:0000902(cell morphogenesis)	[Z] Cytoskeleton ;[T] Signal transduction mechanisms	-	-	5942.86	5145.06	5279.16	3377.56	3061.16	3485.09	57.59	56.4	65.31	40.84	43.88	42.67	5455.69	3307.94	59.7667	42.4633	0.493123	0.493123	0.0176803	0.105545	no	65.31	40.84	1.59917	51.115	10.0059	0.195753
comp17031_c0	comp17031_c0_seq1	1365	1365	P59169	histone H3	GO:0000786(nucleosome);GO:0005634(nucleus);GO:0003677(DNA binding);GO:0006334(nucleosome assembly)	[B] Chromatin structure and dynamics	K11253	ko05322(Systemic lupus erythematosus)	30992.8	29192.8	25521.2	18910.3	15122.1	17091.7	535.57	570.61	562.94	407.76	386.49	373.17	28568.9	17041.4	556.373	389.14	0.515764	0.515764	0.000341261	0.0302757	no	570.61	373.17	1.52909	472.757	92.9923	0.196702
comp19240_c0	comp19240_c0_seq1	1403	1403	-	-	-	-	-	-	3133.66	2278.55	2291.24	3417.19	2706.06	3126.78	52.6	43.26	49.09	71.58	67.18	66.32	2567.82	3083.34	48.3167	68.36	-0.500631	0.500631	0.00618211	0.072599	no	71.58	43.26	1.65465	58.3383	11.5156	0.197393
comp17516_c0	comp17516_c0_seq1	2323	2323	-	-	-	-	-	-	13157.1	11554.3	10389.6	8107.31	5286.8	8176.67	130.51	129.64	131.55	100.35	77.56	102.48	11700.3	7190.26	130.567	93.4633	0.482314	0.482314	0.0426405	0.153589	no	131.55	77.56	1.69611	112.015	22.129	0.197554
comp18402_c0	comp18402_c0_seq1	2014	2014	-	-	-	-	-	-	9841.52	8787.95	7306.2	5534.23	4191.71	5787.78	113.17	114.31	107.25	79.41	71.29	84.09	8645.22	5171.24	111.577	78.2633	0.511627	0.511627	0.0035229	0.0595369	no	114.31	71.29	1.60345	94.92	18.8536	0.198626
comp17981_c0	comp17981_c0_seq1	1930	1930	Q42290	mitochondrial processing peptidase	GO:0005618(cell wall);GO:0009507(chloroplast);GO:0005758(mitochondrial intermembrane space);GO:0005759(mitochondrial matrix);GO:0005741(mitochondrial outer membrane);GO:0005750(mitochondrial respiratory chain complex III);GO:0005730(nucleolus);GO:0005774(vacuolar membrane);GO:0004222(metalloendopeptidase activity);GO:0016491(oxidoreductase activity);GO:0008270(zinc ion binding);GO:0006508(proteol…	[O] Posttranslational modification, protein turnover, chaperones	K01412	-	9551.1	7806.79	8500.08	4756.84	5044.49	6514.63	114.8	106.14	130.42	71.35	89.68	98.94	8619.32	5438.65	117.12	86.6567	0.434605	0.434605	0.048479	0.161696	no	130.42	71.35	1.82789	101.888	20.441	0.200621
comp5856_c0	comp5856_c0_seq1	1877	1877	O64517	-	GO:0005829(cytosol);GO:0005886(plasma membrane);GO:0009506(plasmodesma);GO:0004197(cysteine-type endopeptidase activity);GO:0006952(defense response);GO:0043068(positive regulation of programmed cell death);GO:0016540(protein autoprocessing);GO:0006508(proteolysis)	[D] Cell cycle control, cell division, chromosome partitioning ;[O] Posttranslational modification, protein turnover, chaperones	-	-	5095.83	4564.89	4686.91	2884.99	2565.23	3282.08	63.05	63.89	74.03	44.54	46.94	51.31	4782.54	2910.77	66.99	47.5967	0.493085	0.493085	0.0154751	0.100847	no	74.03	44.54	1.6621	57.2933	11.5101	0.200897
comp19298_c1	comp19298_c1_seq1	1433	1433	-	-	-	-	-	-	2550.69	2210.57	2112.26	3024.6	2636.49	2687.43	41.87	41.05	44.26	61.96	64.01	55.74	2291.17	2782.84	42.3933	60.57	-0.514766	0.514766	0.010192	0.0864875	no	64.01	41.05	1.55932	51.4817	10.3754	0.201536
comp18555_c0	comp18555_c0_seq1	1712	1712	A7RWP6	translation initiation factor eIF-3 subunit 6	GO:0005737(cytoplasm);GO:0003743(translation initiation factor activity)	[J] Translation, ribosomal structure and biogenesis	K03250	-	6046.27	5729.35	4937.64	3414.31	3039.02	3384.73	82.35	88.26	85.84	58.03	61.22	58.25	5571.09	3279.35	85.4833	59.1667	0.530859	0.530859	0.00060279	0.0367099	no	88.26	58.03	1.52094	72.325	14.5798	0.201587
comp4271_c1	comp4271_c1_seq1	1526	1526	-	-	-	-	-	-	5646.75	4652.02	4835.46	3548.7	2327.12	3506.98	86.76	80.85	94.83	68.03	52.88	68.08	5044.74	3127.6	87.48	62.9967	0.473678	0.473678	0.0211899	0.113054	no	94.83	52.88	1.79331	75.2383	15.1735	0.201672
comp4447_c0	comp4447_c0_seq1	768	768	P56331	translation initiation factor eIF-1A	GO:0003743(translation initiation factor activity)	[J] Translation, ribosomal structure and biogenesis	K03236	-	87543.3	64695.3	65110.4	42466.8	39940.2	47543.5	2814.16	2352.35	2671.66	1703.41	1898.89	1931.01	72449.7	43316.8	2612.72	1844.44	0.502374	0.502374	0.0153375	0.10055	no	2814.16	1703.41	1.65207	2228.58	453.341	0.203421
comp18546_c0	comp18546_c0_seq1	1972	1972	Q9FK12	EREBP-like factor	GO:0005737(cytoplasm);GO:0005634(nucleus);GO:0003677(DNA binding);GO:0005515(protein binding);GO:0003700(sequence-specific DNA binding transcription factor activity);GO:0048825(cotyledon development);GO:0009736(cytokinin mediated signaling pathway);GO:0009873(ethylene mediated signaling pathway);GO:0048366(leaf development);GO:0042991(transcription factor import into nucleus)	-	K09286	-	8219.83	6791.11	7047.08	10055.1	8148.93	8582.86	96.62	90.29	105.73	147.47	141.66	127.46	7352.67	8928.96	97.5467	138.863	-0.509501	0.509501	0.00637242	0.0734243	no	147.47	90.29	1.63329	118.205	24.0542	0.203495
comp18148_c0	comp18148_c0_seq1	432	432	-	-	-	-	-	-	1904.63	1493.39	1396.19	835.79	932.14	1148.89	118.69	105.26	111.06	64.99	85.91	90.46	1598.07	972.273	111.67	80.4533	0.473018	0.473018	0.039167	0.147624	no	118.69	64.99	1.82628	96.0617	19.6035	0.204072
