# Supplementary material for: Genome-wide identification of new reference genes for RT-qPCR normalization in CGMMV-infected Lagenaria siceraria
Source: PeerJ. 2018 Oct 12;6:e5642. doi: 10.7717/peerj.5642 (PMC6188008; doi:10.7717/peerj.5642)
Supplement: Table S5 — The RPKM > 4 0, RPKMmax/ min < 2.0, and CV < 0.2, p < 0.05. All the selected internal RGs have only one transcript. [file peerj-06-5642-s010.xlsx]

## Sheet: Sheet1
gene_ID	transcript_id(s)	length	effective_length	Name	Annotation	GO_Term	KOG_des	KEGG_KO	KEGG_Pathway	L1_LCG_count	L2_LCG_count	L3_LCG_count	L1_LCK_count	L2_LCK_count	L3_LCK_count	L1_LCG_rpkm	L2_LCG_rpkm	L3_LCG_rpkm	L1_LCK_rpkm	L2_LCK_rpkm	L3_LCK_rpkm	mean_count_LCG	mean_count_LCK	mean_rpkm_LCG	mean_rpkm_LCK	log2fold_change	ABS(log2fold_change)	pvalue	FDR	significant	rpkm max	rpkm min	max/min	average	SD	CV
comp17031_c0	comp17031_c0_seq1	1365	1365	P59169	histone H3	GO:0000786(nucleosome);GO:0005634(nucleus);GO:0003677(DNA binding);GO:0006334(nucleosome assembly)	[B] Chromatin structure and dynamics	K11253	ko05322(Systemic lupus erythematosus)	30992.8	29192.8	25521.2	18910.3	15122.1	17091.7	535.57	570.61	562.94	407.76	386.49	373.17	28568.9	17041.4	556.373	389.14	0.515764	0.515764	0.000341261	0.0302757	no	570.61	373.17	1.52909	472.757	92.9923	0.196702
comp19078_c0	comp19078_c0_seq1	1715	1715	Q9Y7K5	-	GO:0005829(cytosol)	-	-	-	4940.59	4608.92	3637.6	3191.31	2440.56	3135.54	67.17	70.87	63.12	54.14	49.07	53.86	4395.7	2922.47	67.0533	52.3567	0.356936	0.356936	0.00774562	0.0783339	no	70.87	49.07	1.44426	59.705	8.6056	0.144135
gene_ID	transcript_id(s)	length	effective_length	Name	Annotation	GO_Term	KOG_des	KEGG_KO	KEGG_Pathway	F1_FCG_count	F2_FCG_count	F3_FCG_count	F1_FCK_count	F2_FCK_count	F3_FCK_count	F1_FCG_rpkm	F2_FCG_rpkm	F3_FCG_rpkm	F1_FCK_rpkm	F2_FCK_rpkm	F3_FCK_rpkm	mean_count_FCG	mean_count_FCK	mean_rpkm_FCG	mean_rpkm_FCK	log2fold_change	ABS(log2fold_change)	pvalue	FDR	significant	rpkm max	rpkm min	max/min	Average	SD	CV
comp17031_c0	comp17031_c0_seq1	1365	1365	P59169	histone H3	GO:0000786(nucleosome);GO:0005634(nucleus);GO:0003677(DNA binding);GO:0006334(nucleosome assembly)	[B] Chromatin structure and dynamics	K11253	ko05322(Systemic lupus erythematosus)	25843	26555.5	33339.9	16035.6	12043.7	27195.3	526.28	473.19	482.61	332.43	382.83	381.52	28579.5	18424.9	494.027	365.593	0.434349	0.434349	0.00528306	0.800877	no	526.28	332.43	1.58313	429.81	74.8305	0.174101
comp19078_c0	comp19078_c0_seq1	1715	1715	Q9Y7K5	-	GO:0005829(cytosol)	-	-	-	3793.27	3721.33	4722.61	2544.96	1763.71	4168.69	60.77	52.17	53.78	41.51	44.11	46.01	4079.07	2825.79	55.5733	43.8767	0.340939	0.340939	0.0299352	0.800877	no	60.77	41.51	1.46398	49.725	7.17257	0.144245

## Sheet: Sheet2
gene_ID	transcript_id(s)	length	effective_length	Name	Annotation	GO_Term	KOG_des	KEGG_KO	KEGG_Pathway	L1_LCG_rpkm	L2_LCG_rpkm	L3_LCG_rpkm	L1_LCK_rpkm	L2_LCK_rpkm	L3_LCK_rpkm	F1_FCG_rpkm	F2_FCG_rpkm	F3_FCG_rpkm	F1_FCK_rpkm	F2_FCK_rpkm	F3_FCK_rpkm	rpkm max	rpkm min	max/min	Average	SD	CV
comp19078_c0	comp19078_c0_seq1	1715	1715	Q9Y7K5	-	GO:0005829(cytosol)	-	-	-	67.17	70.87	63.12	60.77	52.17	53.78	54.14	49.07	53.86	41.51	44.11	46.01	70.87	41.51	1.7073	54.715	9.17661	0.167717
comp17031_c0	comp17031_c0_seq1	1365	1365	P59169	histone H3	GO:0000786(nucleosome);GO:0005634(nucleus);GO:0003677(DNA binding);GO:0006334(nucleosome assembly)	[B] Chromatin structure and dynamics	K11253	ko05322(Systemic lupus erythematosus)	535.57	570.61	562.94	526.28	473.19	482.61	407.76	386.49	373.17	332.43	382.83	381.52	570.61	332.43	1.71648	451.283	83.5405	0.185118
